# Supplementary material for: The α-tertiary amine motif drives remarkable selectivity for Pd-catalyzed carbonylation of β-methylene C–H bonds
Source: Royal Society of Chemistry journal article supplement (doi:10.1039/c7sc03876c), 2017-01-01

## Supplementary Materials

### Table of Contents

|                                                                |             |
|----------------------------------------------------------------|-------------|
| <b>General Experimental</b>                                    | <b>S2</b>   |
| <b>Synthesis of Starting Amines</b>                            | <b>S3</b>   |
| <b>Synthesis of <math>\beta</math>-Lactam Products</b>         | <b>S40</b>  |
| <b>Functionalization of <math>\beta</math>-Lactam Products</b> | <b>S60</b>  |
| <b>NMR Spectra of Starting Amines</b>                          | <b>S62</b>  |
| <b>NMR Spectra of <math>\beta</math>-Lactams</b>               | <b>S93</b>  |
| <b>NMR Spectra of Functionalized Products</b>                  | <b>S127</b> |

## General Experimental

All reactions were run under an inert atmosphere ( $\text{N}_2$  or Ar where specified) unless otherwise stated, with oven-dried glassware, using standard techniques. Anhydrous solvents were obtained from solvent stills ( $\text{Et}_2\text{O}$  was distilled from sodium triphenylmethane ketyl; THF from  $\text{LiAlH}_4$ ; MeCN,  $\text{CH}_2\text{Cl}_2$ , hexane and toluene from  $\text{CaH}_2$ ). All other commercial reagents were used as supplied unless otherwise stated. 1,4-benzoquinone was recrystallised from hexane prior to use and stored in the dark. Silver salts were obtained from Alfa Aesar and used as supplied. Palladium salts were obtained from Alfa Aesar, and used as supplied. Silver pivalate was prepared according to a literature procedure.<sup>1</sup>

Analytical thin-layer chromatography (TLC) was performed on Merck Kiesegel 60 F254 0.20 mm precoated, glass backed silica gel plates. Visualisation of the developed chromatogram was performed by UV absorbance ( $\lambda_{\text{max}} = 254 \text{ nm}$ ), and/or by aqueous  $\text{KMnO}_4$ . Flash column chromatography was performed using silica gel (Merck Geduran Si 60 [40-63  $\mu\text{m}$ ]) with the indicated solvent system. P.E. refers to 40-60 petroleum ether.

Nuclear magnetic resonance (NMR) spectra were recorded on a Bruker DPX 400 or DPX 500 spectrometer with cryoprobe. Chemical shifts ( $\delta$ ) for  $^1\text{H}$  NMR spectra are recorded in ppm from  $\text{Me}_4\text{Si}$  with the solvent resonance as the internal standard ( $\text{CDCl}_3 = 7.26 \text{ ppm}$ ,  $\text{D}_2\text{O} = 4.79 \text{ ppm}$ ,  $(\text{CD}_3)_2\text{SO} = 2.50 \text{ ppm}$ ,  $\text{CD}_3\text{OD} = 3.31 \text{ ppm}$ ). Data is reported as follows: chemical shift [integration, multiplicity (s = singlet, d = doublet, t = triplet, q = quartet, qt = quintet, sxt = sextet, spt = septet, m = multiplet, br = broad), coupling constant and molecular assignment].  $^{13}\text{C}$  NMR spectra are reported in ppm from  $\text{Me}_4\text{Si}$  with the solvent resonance as the internal standard ( $\text{CDCl}_3 = 77.16 \text{ ppm}$ ,  $(\text{CD}_3)_2\text{SO} = 39.52$ ,  $\text{CD}_3\text{OD} = 49.00$ ).

Infrared spectra (FT-IR) were recorded using a Perkin-Elmer Paragon 1000 Fourier transform Spectrometer equipped with ATR and analysed as thin films, with absorption maxima ( $\nu_{\text{max}}$ ) being quoted in wavenumbers ( $\text{cm}^{-1}$ ) and characteristic peaks being defined (s = strong, br = broad). High Resolution Mass spectrometry (HRMS) was carried out by the ESPRC Mass Spectrometry Service at the University of Swansea using an LTQ Orbitrap XL spectrometer with positive ion nano-electrospray. Melting points (m.p.) were recorded using a Gallenkamp melting point apparatus and are reported uncorrected.

---

<sup>1</sup>Endo, K.; Grubbs, R. H. *J. Am. Chem. Soc.* **2011**, *133*, 8525.

## Procedures for the Synthesis of Starting Materials

### (1-(ethylamino)cyclohexyl)methyl pivalate (1a)

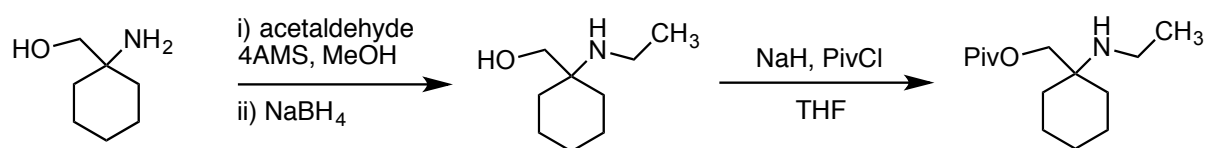

#### Step 1

To a solution of (1-aminocyclohexyl)methanol<sup>2</sup> (1.08 g, 8.4 mmol) in MeOH (10 mL) was added powdered 4Å molecular sieves (~1 g) and acetaldehyde (0.71 mL, 12.5 mmol) and the mixture stirred at ambient temperature for 16 h. The mixture was cooled to 0 °C, sodium borohydride (0.473 g, 12.5 mmol) was added portion-wise and mixture allowed to warm to room temperature and stirred for an additional 2 h. The reaction mixture was filtered and the MeOH removed *in vacuo*. 10% Aqueous NaOH solution was added and the mixture extracted with EtOAc (3 x 10 mL). The combined organic phases were dried ( $\text{MgSO}_4$ ) and concentrated *in vacuo* to afford the crude product as a white solid (1.12 g, 85%) which was used in the next step without further purification.  $^1\text{H}$  NMR (400 MHz,  $\text{CDCl}_3$ )  $\delta$ : 3.29 (2 H, s), 2.50 (2 H, q,  $J = 7.1$  Hz), 1.58 – 1.29 (10 H, m), 1.09 (3 H, t,  $J = 7.1$  Hz).

#### Step 2

(1-(ethylamino)cyclohexyl)methanol (1.12 g, 7.12 mmol) was dissolved in THF (15 mL) and cooled to 0 °C. Sodium hydride (60% in mineral oil, 0.29 g, 7.12 mmol) was added portion-wise and the reaction mixture stirred for 30 minutes at 0 °C. Trimethylacetyl chloride (1.05 mL, 8.55 mmol) was added drop-wise and the reaction mixture allowed to stir for 2 h at room temperature. The solution was concentrated *in vacuo* and water (15 mL) was added. The aqueous layer was extracted with  $\text{CH}_2\text{Cl}_2$  (2 x 20 mL), the combined organic layers washed with saturated aqueous  $\text{NaHCO}_3$  (15 mL) then water (15 mL), dried over  $\text{MgSO}_4$  and concentrated *in vacuo*. The residue was purified by flash column chromatography (alumina, Gradient elution: P.E. to 10% EtOAc in P.E.) to afford the title compound as a colourless oil (0.972 g, 57%). IR  $\nu_{\text{max}}/\text{cm}^{-1}$  (film): 2929, 2857, 1728 (C=O), 1481, 1453, 1395, 1366, 1282, 115;  $^1\text{H}$  NMR (500 MHz,  $\text{CDCl}_3$ )  $\delta$ : 3.95 (2 H, s), 2.50 (2 H, q,  $J = 7.1$  Hz), 1.64 – 1.54 (2 H, m), 1.54 – 1.44 (3 H, m), 1.43 – 1.32 (5 H, m), 1.21 (9 H, s), 1.06 (3 H, t,  $J = 7.1$  Hz);  $^{13}\text{C}$  NMR (126 MHz,  $\text{CDCl}_3$ )  $\delta$ : 178.5, 67.5, 53.9, 39.1, 35.4, 33.0, 27.4, 26.2, 21.5, 16.3; m/z HRMS found  $[\text{M} + \text{H}]^+$  242.2108,  $\text{C}_{14}\text{H}_{28}\text{NO}_2$  requires 242.2115.

<sup>2</sup> Meinzer, A.; Breckel, A.; Thaher, B. A.; Manicone, N.; Otto, H-H. *Helv. Chim. Acta*, **2004**, 90.

### *N*-ethyl-1-(((triisopropylsilyl)oxy)methyl)cyclohexan-1-amine (1b)

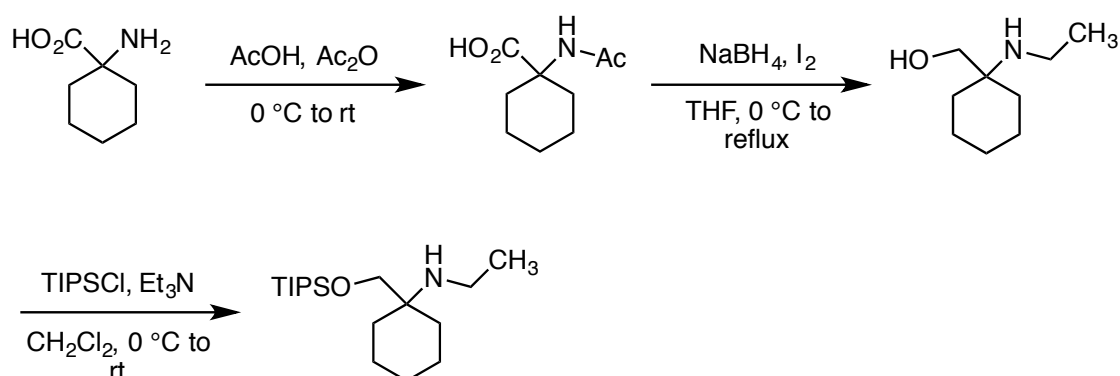

#### Step 1

Acetic anhydride (2.0 mL) was added dropwise to a solution of 1-aminocyclohexane-1-carboxylic acid (1.36 g, 9.5 mmol) in acetic acid (5 mL) at room temperature. After the addition was complete the reaction mixture was stirred for an additional 16 hours and quenched by the addition of ice water (10 mL). The solvent was removed *in vacuo* to give the crude *N*-acetyl amino acid which was used directly in the next step without further purification (1.55 g, 88%). <sup>1</sup>H NMR (400 MHz, (CD<sub>3</sub>)<sub>2</sub>SO) δ: 7.78 (1 H, s), 1.82 (3 H, s), 1.67 – 1.55 (4 H, m), 1.54 – 1.37 (6 H, m).

#### Step 2

To a vigorously stirred suspension of *N*-acetyl amino acid (1.55 g, 8.4 mmol) and sodium borohydride (0.89 g, 23.4 mmol) in anhydrous THF (25 mL) was added a solution of iodine (2.55 g, 10.0 mmol) in anhydrous THF (12 mL) dropwise at 0 °C. Once gas evolution had ceased the mixture was heated at reflux for 18 hours and subsequently cooled to room temperature. Methanol was added cautiously until the solution became clear and the solvent was subsequently removed *in vacuo* to afford a white paste. The paste was dissolved in the minimum amount of 20% aqueous KOH (ca. 7 mL) and stirred at room temperature for 1 hour. The mixture was diluted with 20% aqueous KOH (20 mL) and extracted with CH<sub>2</sub>Cl<sub>2</sub> (3 x 30 mL). The organics were combined, dried over MgSO<sub>4</sub> and removed *in vacuo* to give the crude amino alcohol as a colorless oil (0.98 g, 75%) which was used in the next step without further purification <sup>1</sup>H NMR (400 MHz, CDCl<sub>3</sub>) δ: 3.31 (2 H, s), 2.49 (2 H, q, *J* = 7.1 Hz), 1.57 – 1.35 (10 H, m), 1.11 (3 H, t, *J* = 7.1 Hz).

#### Step 3

Triisopropylsilyl chloride (0.74 mL, 3.5 mmol) was added dropwise to a solution of amino alcohol (0.50 g, 3.2 mmol) and triethylamine (0.88 mL, 6.3 mmol) in anhydrous CH<sub>2</sub>Cl<sub>2</sub> (32 mL) at 0 °C. The resulting solution was allowed to warm to room temperature over 16 hours and was quenched with

H<sub>2</sub>O (30 mL). The organics were separated and washed with additional H<sub>2</sub>O (2 x 30 mL) and brine (30 mL), dried over Na<sub>2</sub>SO<sub>4</sub> and removed *in vacuo*. The crude oil was purified by flash column chromatography (EtOAc) to provide the desired amine as pale yellow oil (0.32g, 32%). IR  $\nu_{\text{max}}/\text{cm}^{-1}$  (film): 2929, 2865, 1463, 1383, 1368, 1306, 1248, 1111, 1093, 1069, 1058. <sup>1</sup>H NMR (400 MHz, CDCl<sub>3</sub>)  $\delta$ : 3.51 (2 H, s), 2.48 (2 H, q,  $J = 7.1$  Hz), 1.60 – 1.53 (2 H, m), 1.46 – 1.30 (9 H, m), 1.07 – 1.02 (24 H, m). <sup>13</sup>C NMR (101 MHz, CDCl<sub>3</sub>)  $\delta$ : 66.0, 55.2, 35.2, 32.6, 26.4, 22.0, 18.2, 16.2, 12.1.  $m/z$  HRMS found  $[M + H]^+$  314.2871, C<sub>18</sub>H<sub>40</sub>ONSi requires 314.2874.

### 1-butyl-*N*-ethylcyclohexan-1-amine (1c)

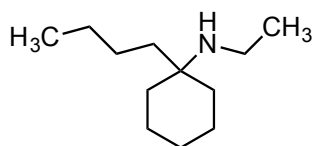

Cyclohexanone (2.07 mL, 20 mmol) and ethylamine (2M solution in THF, 10 mL, 20 mmol) were dissolved in THF (10 mL) over powdered molecular sieves (2 g) and the solution stirred for 18 h. The mixture was filtered and the solvent removed *in vacuo* to afford a light yellow liquid which was dissolved in hexane (4 mL) and added *via* syringe pump over 15 minutes to a stirred solution of *n*-butyl lithium (2.5 M solution in hexane, 16 mL, 40 mmol) in anhydrous hexane (10 mL) at 0 °C. The reaction mixture was allowed to warm to room temperature and stirred for 2 h after which the solution was poured slowly over crushed ice with swirling. The resulting aqueous solution was extracted with Et<sub>2</sub>O (2 x 15 mL), dried over MgSO<sub>4</sub> and concentrated *in vacuo*. Purification by Kugelrohr distillation followed by flash column chromatography (gradient elution: 10% EtOAc in P.E. to 20% EtOAc in P.E.) afforded the desired compound as a light yellow oil (0.459 g, 2.5 mmol, 13%). IR  $\nu_{\text{max}}/\text{cm}^{-1}$  (film): 2921, 2857, 1453, 1380, 1267, 1161, 1116, 1078; <sup>1</sup>H NMR (400 MHz, CDCl<sub>3</sub>)  $\delta$ : 2.46 (2 H, q,  $J = 7.1$  Hz), 1.52 – 1.15 (16 H, m), 1.08 (3 H, t,  $J = 7.1$  Hz), 0.90 (3 H, t,  $J = 7.2$  Hz); <sup>13</sup>C NMR (101 MHz, CDCl<sub>3</sub>)  $\delta$ : 53.5, 36.4, 35.8, 34.9, 26.4, 25.0, 23.6, 22.1, 16.3, 14.4;  $m/z$  HRMS found  $[M + H]^+$  184.2055, C<sub>12</sub>H<sub>26</sub>N requires 184.2060.

## 2-ethyl-2-(ethylamino)butyl pivalate (1d)

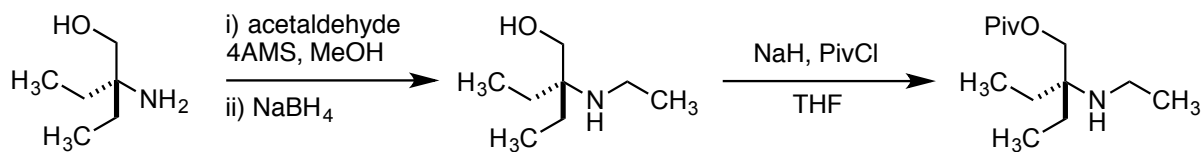

### Step 1

To a solution of 2-amino-2-ethylbutan-1-ol<sup>3</sup> (0.586 g, 5.00 mmol) in MeOH (10 mL) was added powdered 4Å molecular sieves (~1 g) and acetaldehyde (0.42 mL, 7.5 mmol) and the mixture stirred at ambient temperature for 16 hours. The mixture was cooled to 0 °C, sodium borohydride (0.28 g, 7.5 mmol) was added portion-wise and mixture allowed to warm to ambient temperature and stirred for an additional 2 h. The reaction mixture was filtered and the MeOH removed *in vacuo*. 10% Aqueous NaOH solution was added and the mixture extracted with EtOAc (3 x 10 mL). The combined organic phases were dried (MgSO<sub>4</sub>) and concentrated *in vacuo* to afford the crude product as a light yellow oil (0.796 g, 97%) which was used in the next step without further purification. <sup>1</sup>H NMR (400 MHz, CDCl<sub>3</sub>) δ: 3.23 (2 H, s), 2.46 (2 H, q, *J* = 7.1 Hz), 1.35 (2 H, dq, *J* = 15.1, 7.6 Hz), 1.30 – 1.20 (2 H, m), 1.07 (3 H, t, *J* = 7.1 Hz), 0.79 (6 H, t, *J* = 7.6 Hz).

### Step 2

2-ethyl-2-(ethylamino)butan-1-ol (0.706 g, 4.86 mmol) was dissolved in THF (10 mL) and cooled to 0 °C. Sodium hydride (0.194 g, 4.86 mmol) was added portion-wise and the reaction mixture stirred for 30 minutes at 0 °C. Trimethylacetyl chloride (0.719 mL, 5.83 mmol) was added drop-wise and the reaction mixture allowed to stir for 2 hours at room temperature. The solution was concentrated *in vacuo* and water (10 mL) was added. The aqueous layer was extracted with CH<sub>2</sub>Cl<sub>2</sub> (2 x 10 mL), the combined organic layers washed with saturated aqueous NaHCO<sub>3</sub> (15 mL) then water (15 mL), dried over MgSO<sub>4</sub> and concentrated *in vacuo*. The residue was purified by flash column chromatography (alumina, gradient elution: P.E. to 10% EtOAc in P.E.) to afford the title compound as a colourless oil (0.528 g, 47%). IR ν<sub>max</sub>/cm<sup>-1</sup> (film): 2967, 2872, 1730, 1480, 1461, 1396, 1365, 1282, 1149, 1034; <sup>1</sup>H NMR (400 MHz, CDCl<sub>3</sub>) δ: 3.90 (2 H, s), 2.49 (2 H, q, *J* = 7.1 Hz), 1.49 – 1.31 (4 H, m), 1.21 (9 H, s), 1.07 (3 H, t, *J* = 7.1 Hz), 0.83 (6 H, t, *J* = 7.5 Hz); <sup>13</sup>C NMR (101 MHz, CDCl<sub>3</sub>) δ: 178.4, 65.8, 57.1, 39.1, 35.5, 27.4, 26.0, 16.2, 7.5; *m/z* HRMS found [M + H]<sup>+</sup> 230.2113, C<sub>13</sub>H<sub>28</sub>NO<sub>2</sub> requires 230.2115.

<sup>3</sup> Calleja, J.; Pla, D.; Gorman, T. W.; Domingo, V.; Haffemayer, B.; Gaunt, M. J. *Nat. Chem.*, **2015**, 1009.

***N*-cyclohexyl-1-(((triisopropylsilyl)oxy)methyl)cyclohexan-1-amine**

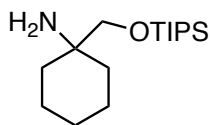

(1-aminocyclohexyl)methanol (6.46 g, 50.0 mmol) was dissolved in CH<sub>2</sub>Cl<sub>2</sub> (100 mL). Triethylamine (13.95 mL, 60.0 mmol) was added followed by slow addition of triisopropylsilyl chloride (12.85 mL, 100.0 mmol). The reaction mixture was stirred at room temperature for 16 hours, quenched with water (100 mL) and extracted with CH<sub>2</sub>Cl<sub>2</sub> (2 x 100 mL). The combined organic layers were washed with brine (100 mL), dried over MgSO<sub>4</sub> and concentrated *in vacuo*. The residue was purified by flash column chromatography (gradient elution: 100% CH<sub>2</sub>Cl<sub>2</sub> to 5% MeOH in CH<sub>2</sub>Cl<sub>2</sub>) to afford the desired compound as a light yellow oil (5.48 g, 38%). IR  $\nu_{\text{max}}/\text{cm}^{-1}$  (film): 2930, 2865, 1463, 1383, 1249, 1094, 1068, 1013; <sup>1</sup>H NMR (400 MHz, CDCl<sub>3</sub>)  $\delta$ : 3.46 (2 H, s), 1.59 – 1.24 (10 H, m), 1.14 – 0.99 (21 H, m); <sup>13</sup>C NMR (101 MHz, CDCl<sub>3</sub>)  $\delta$ : 72.4, 52.5, 35.3, 26.4, 22.1, 18.2, 12.1; *m/z* HRMS found [M + H]<sup>+</sup> 286.2554, C<sub>16</sub>H<sub>35</sub>NOSi requires 286.2561.

***N*-isopropyl-1-(((triisopropylsilyl)oxy)methyl)cyclohexan-1-amine (1e)**

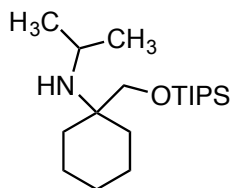

Acetone (1.65 mL, 22.5 mmol) was dissolved in titanium(IV) isopropoxide (6.66 mL, 22.5 mmol) followed by the addition of 1-(((triisopropylsilyl)oxy)methyl)cyclohexan-1-amine (4.28 g, 15.0 mmol) and stirred at ambient temperature overnight before cooling to 0 °C and adding MeOH (30 mL) to the reaction mixture. Sodium borohydride (1.02 g, 27.0 mmol) was added portion-wise and the reaction mixture stirred at 0 °C for 20 minutes then ambient temperature for 1 h. The reaction was quenched by the addition of 10% aqueous NaOH (30 mL) and then diluted with CH<sub>2</sub>Cl<sub>2</sub> (30 mL). The mixture was filtered through Celite, eluting with CH<sub>2</sub>Cl<sub>2</sub>. The organic phase was separated, dried over MgSO<sub>4</sub> and concentrated *in vacuo*. The resulting crude product was purified by flash column chromatography (10% EtOAc in P.E) to afford the title compound as a light yellow oil (0.661 g, 14%). IR  $\nu_{\text{max}}/\text{cm}^{-1}$  (film): 2928, 2865, 1462, 1378, 1361, 1248, 1171, 1111, 1090, 1062, 1012; <sup>1</sup>H NMR (400 MHz, CDCl<sub>3</sub>)  $\delta$ : 3.54 (2 H, s), 2.92 (1 H, hept, *J* = 6.2 Hz), 1.66 – 1.52 (2 H, m), 1.48 – 1.29 (8 H, m), 1.10 – 1.02 (27 H, m). <sup>13</sup>C NMR (101 MHz, CDCl<sub>3</sub>)  $\delta$ : 67.0, 56.3, 41.8, 33.3, 26.4, 26.4, 22.3, 18.3, 12.2; *m/z* HRMS found [M + H]<sup>+</sup> 328.3024, C<sub>19</sub>H<sub>42</sub>NOSi requires 328.3030.

**(1-(heptylamino)cyclohexyl)methyl pivalate (1f)**

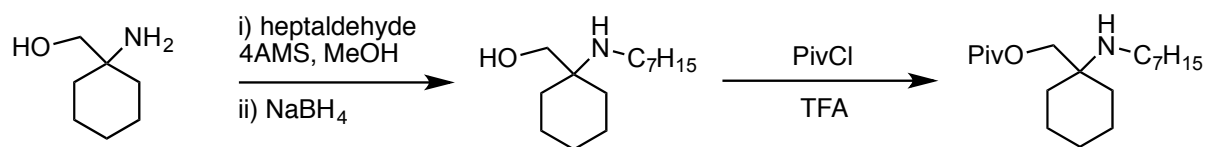

**Step 1**

To a solution of (1-aminocyclohexyl)methanol<sup>2</sup> (1.00 g, 7.7 mmol) in MeOH (10 mL) was added powdered 4Å molecular sieves (~1 g) and heptaldehyde (1.61 mL, 11.55 mmol) and the mixture stirred at ambient temperature for 16 h. The mixture was cooled to 0 °C, sodium borohydride (437 mg, 11.55 mmol) was added portion-wise and mixture allowed to warm to ambient temperature and stirred for an additional 2 h. The reaction mixture was filtered and the MeOH removed *in vacuo*. 10% Aqueous NaOH solution was added and the mixture extracted with EtOAc (3 x 10 mL). The combined organic phases were dried (MgSO<sub>4</sub>) and concentrated *in vacuo* to afford the crude product as a white waxy solid (1.24 g, 71%) which was used in the next step without further purification. <sup>1</sup>H NMR (400 MHz, CDCl<sub>3</sub>) δ: 3.31 (2 H, s), 2.46 (2 H, t, *J* = 7.0 Hz), 1.59 – 1.43 (8 H, m), 1.43 – 1.35 (4 H, m), 1.35 – 1.20 (8 H, m), 0.88 (3 H, t, *J* = 6.8 Hz).

**Step 2**

(1-(heptylamino)cyclohexyl)methanol (1.24 g, 5.45 mmol) was dissolved in trifluoroacetic acid (2.8 mL) and the solution cooled to 0 °C. Trimethylacetyl chloride (1 mL, 8.2 mmol) was added and the solution allowed to warm to room temperature overnight. The volatiles were removed *in vacuo* and the residue dissolved in CH<sub>2</sub>Cl<sub>2</sub>. Water (5 mL) and triethylamine (5 mL) were added until the solution was basic and the mixture stirred for 5 minutes. The resulting solution was extracted with CH<sub>2</sub>Cl<sub>2</sub> (3 x 10 mL) and the combined organic layers washed with water, dried over MgSO<sub>4</sub> and concentrated *in vacuo*. Purification by flash column chromatography (15% EtOAc in P.E.) afforded the title compound as a light yellow oil (953 mg, 56%). IR  $\nu_{\text{max}}$ /cm<sup>-1</sup> (film): 2929, 2853, 1728, 1477, 1459, 1395, 1362, 1280, 1150, 1031; <sup>1</sup>H NMR (400 MHz, CDCl<sub>3</sub>) δ: 3.95 (2 H, s), 2.45 (2 H, t, *J* = 7.0 Hz), 1.65 – 1.54 (2 H, m), 1.54 – 1.44 (3 H, m), 1.44 – 1.34 (7 H, m), 1.33 – 1.23 (8 H, m), 1.21 (9 H, s), 0.87 (3 H, t, *J* = 6.8 Hz); <sup>13</sup>C NMR (101 MHz, CDCl<sub>3</sub>) δ: 178.5, 67.6, 53.8, 41.2, 39.1, 32.9, 32.0, 31.2, 29.4, 27.6, 27.4, 26.2, 22.8, 21.5, 14.2; *m/z* HRMS found [M + H]<sup>+</sup> 312.2893, C<sub>19</sub>H<sub>38</sub>NO<sub>2</sub> requires 312.2897.

## 2-ethyl-2-(propylamino)butyl pivalate (1g)

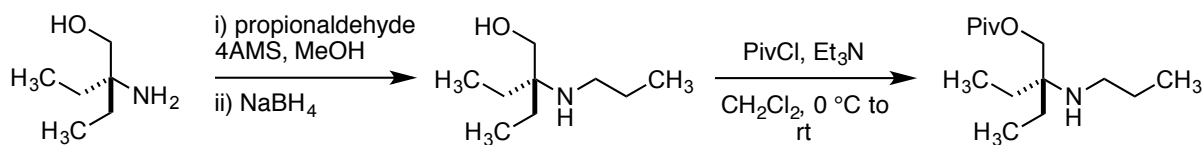

### Step 1

To a solution of 2-amino-2-ethylbutan-1-ol (0.50 g, 4.27 mmol) in MeOH (10 mL) was added powdered 4Å molecular sieves (~1 g) and propionaldehyde (0.46 mL, 6.4 mmol) and the mixture stirred at ambient temperature for 16 hours. The mixture was cooled to 0 °C, sodium borohydride (0.24 g, 6.4 mmol) was added portion-wise and the mixture allowed to warm to ambient temperature and stirred for an additional 2 h. The reaction mixture was filtered and the MeOH removed *in vacuo*. 10% aqueous NaOH solution was added and the mixture extracted with EtOAc (3 x 10 mL). The combined organic phases were dried (MgSO<sub>4</sub>) and concentrated *in vacuo* to afford the crude product as a colourless oil (0.694 g, quant.) which was used in the next step without further purification. <sup>1</sup>H NMR (400 MHz, CDCl<sub>3</sub>) δ: 3.24 (2 H, s), 2.39 (2 H, t, *J* = 7.0 Hz), 1.51 – 1.40 (2 H, m), 1.40 – 1.30 (2 H, m), 1.29 – 1.22 (2 H, m), 0.93 (3 H, t, *J* = 7.3 Hz), 0.80 (6 H, t, *J* = 7.5 Hz).

### Step 2

2-ethyl-2-(propylamino)butan-1-ol (0.694 g, 4.27 mmol) was dissolved in CH<sub>2</sub>Cl<sub>2</sub> (10 mL) and cooled to 0 °C. Triethylamine (1.19 mL, 8.54 mmol) was added followed by drop-wise addition of trimethylacetyl chloride (0.63 mL, 5.12 mmol). The reaction mixture was allowed to warm slowly to ambient temperature and stirred for 16 hours after which it was quenched with water (10 mL) and extracted with CH<sub>2</sub>Cl<sub>2</sub> (x2). The combined organic phases were washed with brine, dried (MgSO<sub>4</sub>) and concentrated *in vacuo*. The resulting residue was purified by flash column chromatography (alumina, gradient elution, P.E. to 5% EtOAc in P.E.) to afford the title compound as a colourless oil (0.718 g, 69%). IR ν<sub>max</sub>/cm<sup>-1</sup> (film): 2964, 2873, 1730, 1481, 1459, 1397, 1366, 1282, 1152, 1035; <sup>1</sup>H NMR (400 MHz, CDCl<sub>3</sub>) δ: 3.89 (2 H, s), 2.40 (2 H, t, *J* = 7.1 Hz), 1.50 – 1.31 (6 H, m), 1.20 (9 H, s), 0.91 (3 H, t, *J* = 7.4 Hz), 0.82 (6 H, t, *J* = 7.5 Hz); <sup>13</sup>C NMR (101 MHz, CDCl<sub>3</sub>) δ: 178.4, 65.8, 56.8, 43.2, 39.1, 27.4, 26.0, 24.0, 12.1, 7.4; *m/z* HRMS found [M + H]<sup>+</sup> 244.2269, C<sub>14</sub>H<sub>30</sub>NO<sub>2</sub> requires 244.2271.

**(1-((3-ethoxy-3-oxopropyl)amino)cyclohexyl)methyl pivalate (1h)**

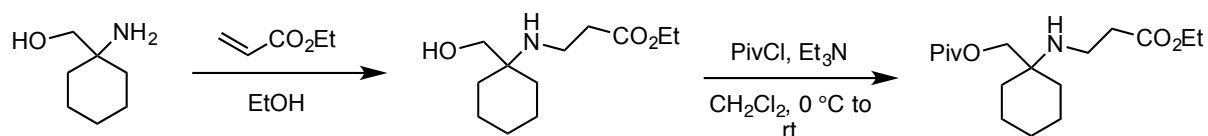

**Step 1**

(1-aminocyclohexyl)methanol<sup>2</sup> (0.646 g, 5.0 mmol) was dissolved in EtOH (5 mL) and the solution cooled to 0 °C. Ethyl acrylate (0.36 mL, 3.33 mmol) was added drop-wise and the mixture stirred at room temperature for 24 h after which it was concentrated *in vacuo*. Purification of the resulting residue by flash column chromatography (5% MeOH in CH<sub>2</sub>Cl<sub>2</sub>) afforded the desired compound as a light yellow oil (0.614 g, 80%). IR  $\nu_{\text{max}}/\text{cm}^{-1}$  (film): 3429 (br), 2933, 2853, 1728, 1447, 1374, 1261, 1181, 1165, 1098, 1027; <sup>1</sup>H NMR (400 MHz, CDCl<sub>3</sub>)  $\delta$ : 4.16 (2 H, q,  $J = 7.1$  Hz), 3.31 (2 H, s), 2.73 (2 H, t,  $J = 5.8$  Hz), 2.48 (2 H, t,  $J = 5.7$  Hz), 1.60 – 1.30 (10 H, m), 1.27 (3 H, t,  $J = 7.1$  Hz); <sup>13</sup>C NMR (101 MHz, CDCl<sub>3</sub>)  $\delta$ : 173.3, 65.4, 60.8, 36.0, 35.4, 32.8, 26.2, 21.8, 14.4; m/z HRMS found [M + H]<sup>+</sup> 230.1750, C<sub>12</sub>H<sub>24</sub>NO<sub>3</sub> requires 230.1751.

**Step 2**

Ethyl 3-((1-(hydroxymethyl)cyclohexyl)amino)propanoate (0.60 g, 2.60 mmol) was dissolved in CH<sub>2</sub>Cl<sub>2</sub> (5 mL) and cooled to 0 °C. Triethylamine (0.73 mL, 3.12 mmol) was added followed by drop-wise addition of trimethylacetyl chloride (0.38 mL, 5.20 mmol). The reaction mixture was allowed to warm slowly to ambient temperature and stirred for 16 h after which it was quenched with water (5 mL) and extracted with CH<sub>2</sub>Cl<sub>2</sub> (2 x 10 mL). The combined organic phases were washed with brine, dried (MgSO<sub>4</sub>) and concentrated *in vacuo*. The resulting residue was purified by flash column chromatography (20% EtOAc in P.E.) to afford the desired compound as a light yellow oil (0.673 g, 83%). IR  $\nu_{\text{max}}/\text{cm}^{-1}$  (film): 2933, 2857, 1726, 1483, 1459, 1395, 1368, 1282, 1215, 1152, 1102, 1056, 1031; <sup>1</sup>H NMR (400 MHz, CDCl<sub>3</sub>)  $\delta$ : 4.13 (2 H, q,  $J = 7.1$  Hz), 3.93 (2 H, s), 2.76 (2 H, t,  $J = 6.4$  Hz), 2.44 (2 H, t,  $J = 6.3$  Hz), 1.62 – 1.31 (10 H, m), 1.26 (3 H, t,  $J = 7.1$  Hz), 1.22 (9 H, s); <sup>13</sup>C NMR (101 MHz, CDCl<sub>3</sub>)  $\delta$ : 178.5, 173.0, 68.3, 60.5, 54.0, 39.1, 37.0, 36.2, 32.7, 27.4, 26.2, 21.4, 14.4; m/z HRMS found [M + H]<sup>+</sup> 314.2332, C<sub>17</sub>H<sub>32</sub>NO<sub>4</sub> requires 314.2326.

**(1-((2-(phenylsulfonyl)ethyl)amino)cyclohexyl)methyl pivalate (1i)**

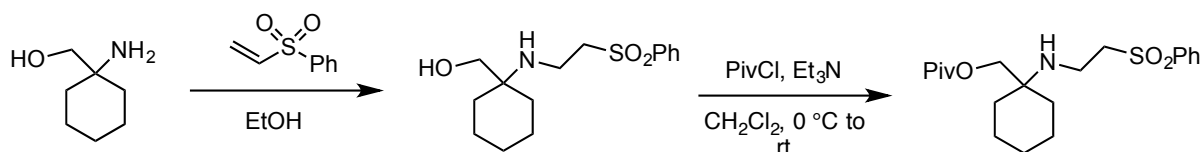

**Step 1**

(1-aminocyclohexyl)methanol<sup>2</sup> (1.00 g, 7.74 mmol) was dissolved in EtOH (5 mL) and the solution cooled to 0 °C. Phenyl vinyl sulfone (0.868 g, 5.16 mmol) in EtOH (10 mL) was added drop-wise and the mixture stirred at room temperature for 24 hours after which it was concentrated *in vacuo*. Purification of the resulting residue by flash column chromatography (5% MeOH in CH<sub>2</sub>Cl<sub>2</sub>) afforded the desired compound as a light yellow solid (1.38 g, 60%). m.p: 60–62 °C; IR  $\nu_{\text{max}}/\text{cm}^{-1}$  (film): 3111 (br), 2917, 2845, 1479, 1447, 1415, 1312, 1290, 1259, 1221, 1179, 1152, 1088, 1070, 1052, 1036, 1015; <sup>1</sup>H NMR (400 MHz, CDCl<sub>3</sub>)  $\delta$ : 7.94 (2 H, m), 7.71 – 7.63 (1 H, m), 7.58 (2 H, td,  $J$  = 6.8, 1.5 Hz), 3.28 (2 H, t,  $J$  = 6.1 Hz), 3.27 (2 H, s), 2.97 – 2.84 (2 H, m), 1.56 – 1.38 (7 H, m), 1.37 – 1.21 (3 H, m); <sup>13</sup>C NMR (101 MHz, CDCl<sub>3</sub>)  $\delta$ : 139.6, 134.0, 129.6, 128.0, 65.3, 57.3, 55.4, 34.7, 32.6, 26.1, 21.7; m/z HRMS found  $[M + H]^+$  298.1469, C<sub>15</sub>H<sub>24</sub>NO<sub>3</sub>S requires 298.1471.

**Step 2**

(1-((2-(phenylsulfonyl)ethyl)amino)cyclohexyl)methanol (1.20 g, 4.0 mmol) was dissolved in CH<sub>2</sub>Cl<sub>2</sub> (10 mL) and cooled to 0 °C. Triethylamine (1.11 mL, 8.0 mmol) was added followed by drop-wise addition of trimethylacetyl chloride (0.59 mL, 4.8 mmol). The reaction mixture was allowed to warm slowly to ambient temperature and stirred for 16 h after which it was quenched with water (10 mL) and extracted with CH<sub>2</sub>Cl<sub>2</sub> (2 x 10 mL). The combined organic phases were washed with brine, dried (MgSO<sub>4</sub>) and concentrated *in vacuo*. The resulting residue was purified by flash column chromatography (40% EtOAc in P.E.) to afford the title compound as a viscous colourless oil (1.52 g, quant.). IR  $\nu_{\text{max}}/\text{cm}^{-1}$  (film): 2933, 2857, 1722, 1479, 1449, 1397, 1362, 1304, 1282, 1142, 1082, 1035; <sup>1</sup>H NMR (400 MHz, CDCl<sub>3</sub>)  $\delta$ : 7.94 – 7.90 (2 H, m), 7.69 – 7.63 (1 H, m), 7.60 – 7.54 (2 H, m), 3.89 (2 H, s), 3.27 (2 H, t,  $J$  = 6.3 Hz), 2.93 (2 H, t,  $J$  = 6.3 Hz), 1.62 – 1.25 (10 H, m), 1.20 (9 H, s); <sup>13</sup>C NMR (101 MHz, CDCl<sub>3</sub>)  $\delta$ : 178.5, 139.7, 133.9, 129.5, 128.1, 68.0, 57.6, 54.3, 39.1, 35.4, 32.5, 27.4, 26.0, 21.3; m/z HRMS found  $[M + H]^+$  382.2046, C<sub>20</sub>H<sub>32</sub>NO<sub>4</sub>S requires 382.2047.

**(1-((3-(pyridin-2-yl)propyl)amino)cyclohexyl)methyl pivalate (1j)**

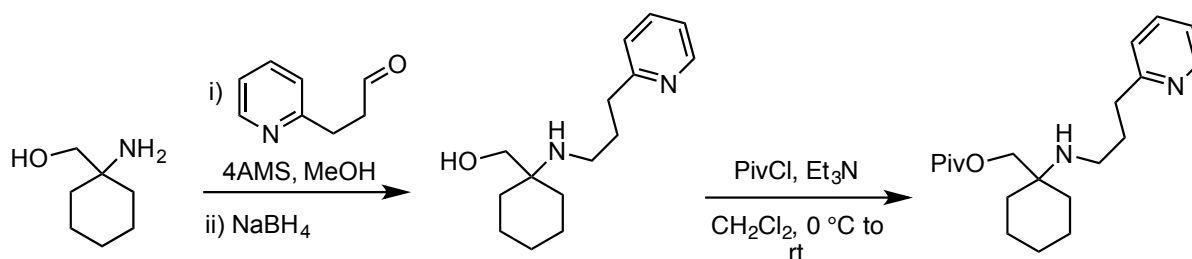

**Step 1**

To a solution of (1-aminocyclohexyl)methanol<sup>2</sup> (0.646 g, 5.00 mmol) in MeOH (10 mL) was added powdered 4Å molecular sieves (~1 g) and 3-(pyridin-2-yl)propanal<sup>4</sup> (0.811 g, 6.00 mmol) and the mixture stirred at ambient temperature for 16 hours. The mixture was cooled to 0 °C, sodium borohydride (0.227 g, 6.00 mmol) was added portion-wise and mixture allowed to warm to ambient temperature and stirred for an additional 3 h. The reaction mixture was filtered and the MeOH removed *in vacuo*. 10% aqueous NaOH solution was added and the mixture extracted with EtOAc (3 x 10 mL). The combined organic phases were dried (MgSO<sub>4</sub>) and concentrated *in vacuo* to afford the crude product, which was purified by flash column chromatography (10% MeOH in CH<sub>2</sub>Cl<sub>2</sub>) to afford the desired compound as a light brown viscous oil (923 mg, 74%); <sup>1</sup>H NMR (400 MHz, CDCl<sub>3</sub>) δ: 8.49 (1 H, d, *J* = 4.9 Hz), 7.60 (1 H, td, *J* = 7.7, 1.8 Hz), 7.16 (1 H, d, *J* = 7.8 Hz), 7.11 (1 H, dd, *J* = 7.4, 5.0 Hz), 3.28 (2 H, s), 2.88 (2 H, t, *J* = 7.3 Hz), 2.47 (2 H, t, *J* = 6.5 Hz), 1.89 (2 H, qt, *J* = 6.9 Hz), 1.52 – 1.27 (10 H, m); <sup>13</sup>C NMR (101 MHz, CDCl<sub>3</sub>) δ: 161.8, 149.1, 136.8, 123.1, 121.3, 64.9, 55.0, 39.0, 35.5, 32.8, 30.8, 26.2, 21.8.

**Step 2**

(1-((3-(pyridin-2-yl)propyl)amino)cyclohexyl)methanol (0.90 g, 3.60 mmol) was dissolved in CH<sub>2</sub>Cl<sub>2</sub> (7 mL) and cooled to 0 °C. Triethylamine (1.00 mL, 7.2 mmol) was added followed by drop-wise addition of trimethylacetyl chloride (0.532 mL, 4.32 mmol). The reaction mixture was allowed to warm slowly to ambient temperature and stirred for 16 h after which it was quenched with water (7 mL) and extracted with CH<sub>2</sub>Cl<sub>2</sub> (2 x 10 mL). The combined organic phases were washed with brine (10 mL), dried (MgSO<sub>4</sub>) and concentrated *in vacuo*. The resulting residue was purified by flash column chromatography (5% MeOH in CH<sub>2</sub>Cl<sub>2</sub>) to afford the title compound as a light yellow oil (0.802 g, 67%). IR  $\nu_{\text{max}}$ /cm<sup>-1</sup> (film): 2933, 2853, 1728, 1590, 1570, 1477, 1435, 1397, 1364, 1282, 1154, 1102, 1035; <sup>1</sup>H NMR (400 MHz, CDCl<sub>3</sub>) δ: 8.50 (1 H, dd, *J* = 4.8, 0.8 Hz), 7.57 (1 H, td, *J* = 7.7, 1.8 Hz), 7.14 (1 H, d, *J* = 7.8 Hz), 7.08 (1 H, dd, *J* = 7.3, 5.6 Hz), 3.91 (2 H, s), 2.86 (2 H, t, *J* =

<sup>4</sup> Kitbunnadaj, R.; Zuiderveld, O.P.; Christophe, B.; Hulscher, S.; Menge, W. M. P.B.; Gelens, E.; Snip, E.; Bakker, R. A.; Celanire, S.; Gillard, M.; Talaga, P.; Timmerman, H.; Leurs, R. *J. Med Chem.*, **2004**, 2414.

7.8 Hz), 2.53 (2 H, t,  $J = 6.9$  Hz), 1.86 (2 H, qt,  $J = 7.3$  Hz), 1.63 – 1.27 (10 H, m), 1.18 (9 H, s);  $^{13}\text{C}$  NMR (101 MHz,  $\text{CDCl}_3$ )  $\delta$ : 178.5, 162.2, 149.3, 136.4, 122.8, 121.1, 68.0, 53.8, 40.7, 39.1, 36.4, 32.8, 31.3, 27.4, 26.2, 21.4;  $m/z$  HRMS found  $[\text{M} + \text{H}]^+$  333.2535,  $\text{C}_{20}\text{H}_{33}\text{N}_2\text{O}_2$  requires 333.2527.

***N*-cyclohexyl-1-(((triisopropylsilyl)oxy)methyl)cyclohexan-1-amine (1k)**

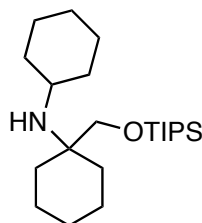

Cyclohexanone (0.40 mL, 3.85 mmol) was dissolved in titanium(IV) isopropoxide (1.55 mL, 5.25 mmol), 1-(((triisopropylsilyl)oxy)methyl)cyclohexan-1-amine (1.00 g, 3.50 mmol) was added and the reaction mixture stirred at room temperature overnight before cooling to 0 °C and adding methanol (15 mL). Sodium borohydride (0.24 g, 6.30 mmol) was added portion-wise and the reaction mixture stirred at 0 °C for 20 minutes then ambient temperature for 1 h. The reaction was quenched by the addition of 10% aqueous NaOH (15 mL) and then diluted with  $\text{CH}_2\text{Cl}_2$  (15 mL). The mixture was filtered through Celite, eluting with  $\text{CH}_2\text{Cl}_2$  (30 mL). The organic phase was separated, dried over  $\text{MgSO}_4$  and concentrated *in vacuo*. The resulting crude product was purified by flash column chromatography (20% EtOAc in P.E) followed by SCX column, loaded in MeOH, washed with MeOH and eluted with ammonia in MeOH solution (2 M, 50 mL) to afford the title compound as a colourless oil (0.164 g, 13%). IR  $\nu_{\text{max}}/\text{cm}^{-1}$  (film): 2930, 2864, 1462, 1383, 1247, 1093, 1068, 1012;  $^1\text{H}$  NMR (400 MHz,  $\text{CDCl}_3$ )  $\delta$ : 3.53 (2 H, s), 2.46 (1 H, tt,  $J = 10.2, 3.7$  Hz), 1.77 (2 H, app d,  $J = 11.7$  Hz), 1.68 (2 H, dt,  $J = 12.9, 2.9$  Hz), 1.63 – 1.52 (3 H, m), 1.45 – 1.12 (13 H, m), 1.10 – 1.02 (21 H, m).  $^{13}\text{C}$  NMR (101 MHz,  $\text{CDCl}_3$ )  $\delta$ : 67.2, 56.2, 50.1, 37.0, 33.4, 26.4, 26.0, 25.9, 22.3, 18.3, 12.2;  $m/z$  HRMS found  $[\text{M} + \text{H}]^+$  368.3336,  $\text{C}_{22}\text{H}_{46}\text{NOSi}$  requires 368.3343.

**(1-(methylamino)cyclohexyl)methanol**

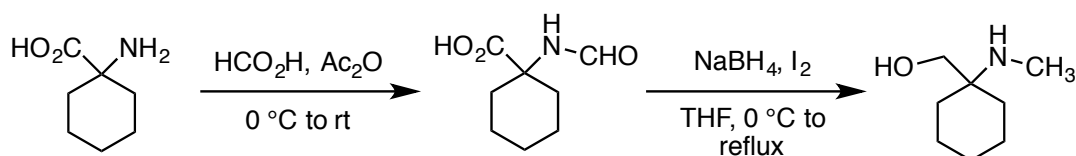

**Step 1**

To a dry 250 mL 3-neck round-bottomed flask equipped with pressure-equalizing addition funnel, thermometer and nitrogen inlet was added 1-aminocyclohexane-1-carboxylic acid (7.16 g, 50 mmol)

and formic acid (> 95%, 125 mL). Acetic anhydride (47.5 mL) was added dropwise over 30 minutes ensuring the temperature remained below 50 °C. The solution was stirred at room temperature for 90 minutes and was quenched with ice water (130 mL). The solvent was removed *in vacuo* to give the crude *N*-formyl amino acid which was used directly in the next step without further purification (quantitative yield). <sup>1</sup>H NMR (400 MHz, (CD<sub>3</sub>)<sub>2</sub>SO) δ: 12.02 (1 H, br s), 7.94 (1 H, s), 1.99 – 1.88 (2 H, s), 1.70 – 1.58 (2 H, m), 1.56 – 1.39 (6 H, m).

## Step 2

To a dry 250 mL 3-neck round-bottomed flask equipped with pressure-equalizing addition funnel and condenser under nitrogen was added *N*-formyl amino acid (6.84 g, 40 mmol), sodium borohydride (4.26 g, 112.2 mmol) and anhydrous THF (100 mL). The mixture was cooled to 0 °C and a solution of iodine (11.85 g, 46.6 mmol) in anhydrous THF (40 mL) was added dropwise with vigorous stirring (*Caution – vigorous gas evolution can be delayed!*). Once gas evolution had ceased the mixture was heated to a vigorous reflux for 18 hours. The mixture was cooled to room temperature and then to 0 °C and quenched cautiously by the dropwise addition of methanol. Once the solution had become clear, the solvent was removed *in vacuo* and the residue stirred with a mixture of 20% aqueous KOH (50 mL) and CH<sub>2</sub>Cl<sub>2</sub> (50 mL) for 36 hours. The mixture was diluted with brine (100 mL), CH<sub>2</sub>Cl<sub>2</sub> (50 mL) and the organic layer separated. The aqueous was extracted with additional CH<sub>2</sub>Cl<sub>2</sub> (3 x 50 mL), the organics were combined, dried over MgSO<sub>4</sub> and the solvent removed *in vacuo* to give the crude amino alcohol as a colorless oil (5.29 g, 92%) which was used in the next step without further purification. IR  $\nu_{\text{max}}$ /cm<sup>-1</sup> (film): 3304 (br), 2927, 2855, 1449, 1361, 1301, 1118, 1064, 1040. <sup>1</sup>H NMR (400 MHz, CDCl<sub>3</sub>) δ: 3.29 (2 H, s), 2.23 (3 H, s), 1.51 – 1.32 (10 H, m). <sup>13</sup>C NMR (101 MHz, CDCl<sub>3</sub>) δ: 64.7, 54.9, 32.1, 27.2, 26.1, 21.8. *m/z* HRMS found [M + H]<sup>+</sup> 144.1381, C<sub>8</sub>H<sub>18</sub>ON requires 144.1383

## (1-(methylamino)cyclohexyl)methyl pivalate (1m)

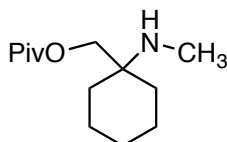

To a solution of (1-(methylamino)cyclohexyl)methanol (0.47 g, 3.3 mmol) in anhydrous CH<sub>2</sub>Cl<sub>2</sub> (30 mL) was added triethylamine (0.92 mL, 6.6 mmol) and trimethylacetyl chloride (0.45 mL, 3.6 mmol) dropwise at 0 °C. The reaction mixture was warmed to room temperature over 16 hours and quenched by the addition of saturated aqueous NaHCO<sub>3</sub> (30 mL). The organic layer was separated and washed with additional saturated aqueous NaHCO<sub>3</sub> (2 x 30 mL), brine (30 mL) and dried over MgSO<sub>4</sub>. The solvent was removed *in vacuo* and the crude oil purified by flash column chromatography (EtOAc) to

afford the product as a colourless oil (0.33 g, 44%). IR  $\nu_{\text{max}}/\text{cm}^{-1}$  (film): 2931, 2855, 1728, 1480, 1463, 1397, 1364, 1282, 1150.  $^1\text{H}$  NMR (400 MHz,  $\text{CDCl}_3$ )  $\delta$ : 3.77 (2 H, s), 2.09 (3 H, s), 1.43 – 1.16 (10 H, m), 1.04 (9 H, s).  $^{13}\text{C}$  NMR (101 MHz,  $\text{CDCl}_3$ )  $\delta$ : 177.9, 66.8, 53.5, 38.7, 32.0, 27.6, 27.0, 25.8, 21.1.  $m/z$  HRMS found  $[\text{M} + \text{H}]^+$  228.1953,  $\text{C}_{13}\text{H}_{26}\text{O}_2\text{N}$  requires 228.1958.

***N*-methyl-1-(((triisopropylsilyl)oxy)methyl)cyclohexan-1-amine (1n)**

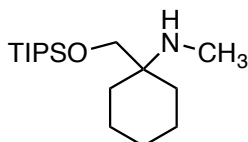

Triisopropylsilyl chloride (7.31 mL, 34.16 mmol) was added dropwise to a solution of (1-(methylamino)cyclohexyl)methanol (5.15 g, 36.0 mmol) and triethylamine (7.52 mL, 53.9 mmol) in anhydrous  $\text{CH}_2\text{Cl}_2$  (100 mL) at 0 °C. The resulting solution was allowed to warm to room temperature over 16 hours and was quenched with  $\text{H}_2\text{O}$  (100 mL). The organics were separated and washed with additional  $\text{H}_2\text{O}$  (2 x 100 mL) and brine (100 mL), dried over  $\text{Na}_2\text{SO}_4$  and removed *in vacuo*. The crude oil was purified by flash column chromatography (gradient elution: 1% MeOH in  $\text{CH}_2\text{Cl}_2$  to 5% MeOH in  $\text{CH}_2\text{Cl}_2$ ) to provide the desired amine as pale yellow oil (5.56 g, 52%). IR  $\nu_{\text{max}}/\text{cm}^{-1}$  (film): 2929, 2865, 1463, 1383, 1367, 1307, 1254, 1123, 1090, 1057.  $^1\text{H}$  NMR (400 MHz,  $\text{CDCl}_3$ )  $\delta$ : 3.51 (2 H, s), 2.25 (3 H, s), 1.85 (1 H, br s), 1.61 – 1.52 (2 H, m), 1.50 – 1.43 (3 H, m), 1.39 – 1.31 (5 H, m), 1.09 – 1.04 (21 H, m).  $^{13}\text{C}$  NMR (101 MHz,  $\text{CDCl}_3$ )  $\delta$ : 65.8, 55.3, 32.0, 27.9, 26.4, 21.8, 18.2, 12.1.  $m/z$  HRMS found  $[\text{M} + \text{H}]^+$  300.2715,  $\text{C}_{17}\text{H}_{38}\text{NOSi}$  requires 300.2717

**(4-(methylamino)tetrahydro-2H-pyran-4-yl)methyl pivalate (1o)**

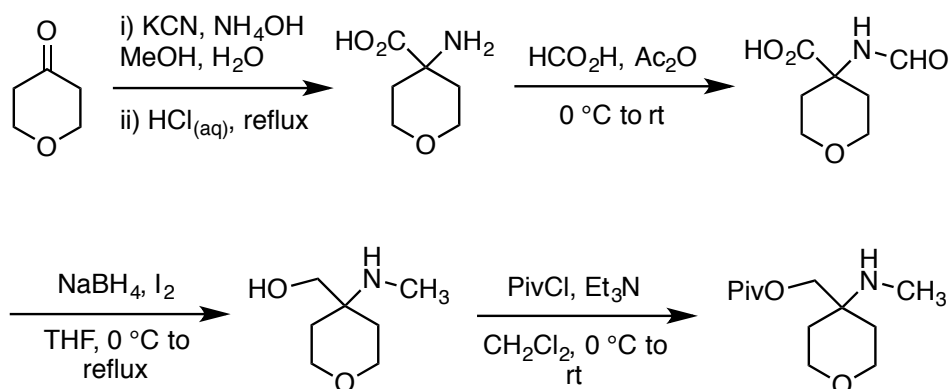

### Step 1

A solution of tetrahydro-4H-pyran-4-one (2.5 mL, 27.1 mmol) in methanol (16 mL) was added to a vigorously stirred solution of potassium cyanide (1.76 g, 27.1 mmol), ammonium hydroxide solution (35%, 8.0 mL) and ammonium chloride (1.60 g, 29.8 mmol) in H<sub>2</sub>O (5.5 mL) at room temperature. The reaction mixture was stirred overnight, diluted with CH<sub>2</sub>Cl<sub>2</sub> (20 mL) and the organic layer separated. The aqueous phase was extracted with CH<sub>2</sub>Cl<sub>2</sub> (2 x 20 mL), the organics were combined, dried over MgSO<sub>4</sub> and removed *in vacuo*. The resulting product was obtained as yellow oil (3.07 g, 90%) and used without further purification. <sup>1</sup>H NMR (400 MHz, CDCl<sub>3</sub>) δ: 3.98 (2 H, dt, *J* = 12.4, 4.1 Hz), 3.66 (2 H, ddd, *J* = 12.4, 10.3, 2.5 Hz), 2.02 – 1.95 (2H, m), 1.75 (2 H, ddd, *J* = 13.9, 10.3, 4.1 Hz).

### Step 2

The crude product was treated with conc. HCl (80 mL) and water (40 mL) and refluxed for 16 hours. The reaction mixture was subsequently cooled to room temperature and the solvent removed *in vacuo*. The resulting solid was dissolved in the minimum amount of water (80 °C) and was treated with 10% aqueous NaOH until pH = 6. The mixture was cooled to 0 °C and the resulting precipitate removed by vacuum filtration to afford the product as a pale brown solid (2.40 g, 69%). (If no precipitate is formed the solvent is removed *in vacuo*, the residue taken up in ethanol and filtered, and the resulting filtrate removed *in vacuo* to afford the product). <sup>1</sup>H NMR (400 MHz, D<sub>2</sub>O) δ: 2.89 – 2.76 (4 H m), 2.41 – 2.32 (2 H, m), 2.09 – 2.03 (2 H, m).

### Step 3

Acetic anhydride (6 mL) was added dropwise to a solution of crude amino acid (1.05 g, 8.7 mmol) in formic acid (> 95%, 17 mL) at room temperature. After the addition was complete the reaction mixture was stirred for an additional hour and quenched by the addition of ice water (10 mL). The solvent was removed *in vacuo* to give the crude *N*-formyl amino acid which was used directly in the next step without further purification (quantitative yield). <sup>1</sup>H NMR (400 MHz, (CD<sub>3</sub>)<sub>2</sub>SO) δ: 7.96 (1 H, s), 2.81 – 2.70 (2 H, m), 2.48 – 2.43 (2 H, m), 2.29 – 2.21 (2 H, m), 1.97 – 1.88 (2 H, m).

### Step 4

To a vigorously stirred suspension of *N*-formyl amino acid (1.25 g, 7.2 mmol) and sodium borohydride (0.77 g, 20.2 mmol) in anhydrous THF (20 mL) was added a solution of iodine (2.2 g, 8.7 mmol) in anhydrous THF (10 mL) dropwise at 0 °C. Once gas evolution had ceased the mixture was heated at reflux for 18 hours and subsequently cooled to room temperature. Methanol was added cautiously until the solution became clear and the solvent was subsequently removed *in vacuo* to afford a white paste. The paste was dissolved in the minimum amount of 20% aqueous KOH (ca. 5

mL) and stirred at room temperature for 1 hour. The mixture was diluted with 20% aqueous KOH (10 mL) and extracted with CH<sub>2</sub>Cl<sub>2</sub> (3 x 30 mL). The organics were combined, dried over MgSO<sub>4</sub> and removed *in vacuo* to give the crude amino alcohol as a colorless oil (0.57 g, 54%) which was used in the next step without further purification <sup>1</sup>H NMR (400 MHz, CDCl<sub>3</sub>) δ: 3.38 (2 H, s), 2.77 – 2.68 (2 H, m), 2.59 – 2.50 (2 H, m), 2.29 (3 H, s), 1.95 – 1.81 (2 H, m), 1.77 – 1.67 (2 H, m).

### Step 5

To a solution of crude amino alcohol (0.57 g, 3.9 mmol) in anhydrous CH<sub>2</sub>Cl<sub>2</sub> (30 mL) was added triethylamine (1.1 mL, 7.9 mmol) and trimethylacetyl chloride (0.53 mL, 4.3 mmol) dropwise at 0 °C. The reaction mixture was warmed to room temperature over 16 hours and quenched by the addition of saturated aqueous NaHCO<sub>3</sub> (20 mL). The organic layer was separated and washed with additional saturated aqueous NaHCO<sub>3</sub> (2 x 20 mL), brine (20 mL) and dried over MgSO<sub>4</sub>. The solvent was removed *in vacuo* and the crude oil purified by flash column chromatography (EtOAc) to afford the product as a colourless oil (0.32 g, 36%). IR  $\nu_{\text{max}}$ /cm<sup>-1</sup> (film): 2959, 2928, 1726, 1480, 1460, 1428, 1387, 1365, 1281, 1152, 1102, 1078, 1036. <sup>1</sup>H NMR (400 MHz, CDCl<sub>3</sub>) δ: 3.80 (2 H, s), 2.91 (2 H, ddd, *J* = 2.6, 11.5, 13.7 Hz), 2.24 (2 H, dt, *J* = 3.7, 13.6 Hz), 2.15 (3 H, s), 1.76 (2 H, dt, *J* = 3.2, 14.3 Hz), 1.57 (2 H, ddd, *J* = 3.4, 11.4, 13.4 Hz), 1.12 (9 H, s), 0.78 (1 H, br s). <sup>13</sup>C NMR (101 MHz, CDCl<sub>3</sub>) δ: 178.0, 67.4, 52.6, 38.9, 33.2, 27.3, 27.1, 22.8. *m/z* HRMS found [M + H]<sup>+</sup> 230.1749, C<sub>12</sub>H<sub>24</sub>O<sub>3</sub>N requires 230.1751.

### (4-(methylamino)tetrahydro-2H-thiopyran-4-yl)methyl pivalate (1p)

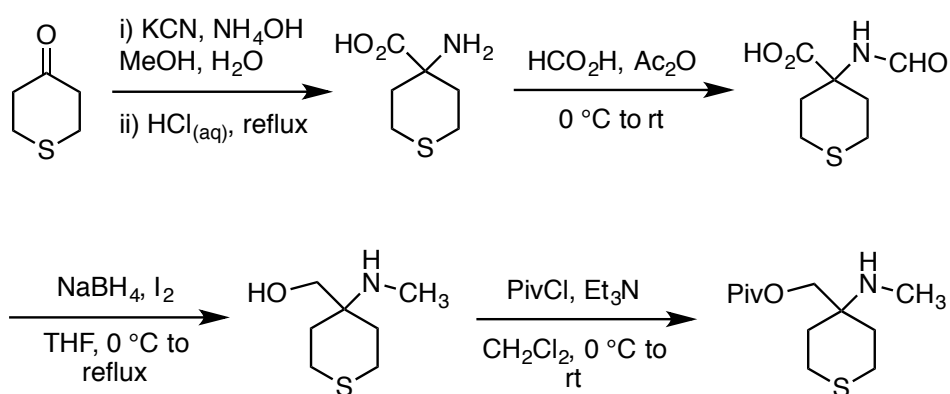

### Step 1

A solution of tetrahydro-4H-thiopyran-4-one (2.0 g, 17.2 mmol) in methanol (10 mL) was added to a vigorously stirred solution of potassium cyanide (1.12 g, 17.2 mmol), ammonium hydroxide solution (35%, 5.0 mL) and ammonium chloride (1.01 g, 18.9 mmol) in H<sub>2</sub>O (3.5 mL) at room temperature. The reaction mixture was stirred overnight, diluted with CH<sub>2</sub>Cl<sub>2</sub> (15 mL) and the organic layer

separated. The aqueous was extracted with  $\text{CH}_2\text{Cl}_2$  (2 x 15 mL), the organics were combined, dried over  $\text{MgSO}_4$  and removed *in vacuo*. The resulting product was obtained as brown oil (2.18 g, 89%) and used without further purification.  $^1\text{H}$  NMR (400 MHz,  $\text{CDCl}_3$ )  $\delta$ : 2.91 – 2.82 (2 H, m), 2.79 – 2.69 (2 H, m), 2.32 – 2.22 (2 H, m), 1.91 – 1.82 (2 H, m).

## Step 2

The crude product was treated with conc.  $\text{HCl}$  (50 mL) and water (25 mL) and refluxed for 16 hours. The reaction mixture was subsequently cooled to room temperature and the solvent removed *in vacuo*. The resulting solid was dissolved in the minimum amount of water (80 °C) and was treated with 10% aqueous  $\text{NaOH}$  until  $\text{pH} = 6$ . The mixture was cooled to 0 °C and the resulting precipitate removed by vacuum filtration to afford the product as a pale brown solid (2.08 g, 84%). (If no precipitate is formed the solvent is removed *in vacuo*, the residue taken up in ethanol and filtered, and the resulting filtrate removed *in vacuo* to afford the product).  $^1\text{H}$  NMR (400 MHz,  $\text{D}_2\text{O}$ )  $\delta$ : 4.04 – 3.79 (4 H, m), 2.31 – 2.19 (2 H, m), 1.91 – 1.83 (2 H, m).

## Step 3

Acetic anhydride (8 mL) was added dropwise to a solution of crude amino acid (1.50 g, 9.3 mmol) in formic acid (> 95%, 18 mL) at room temperature. After the addition was complete the reaction mixture was stirred for 1 hour and quenched by the addition of ice water (10 mL). The solvent was removed *in vacuo* to give the crude *N*-formyl amino acid which was used directly in the next step without further purification (quantitative yield).  $^1\text{H}$  NMR (400 MHz,  $(\text{CD}_3)_2\text{SO}$ )  $\delta$ : 7.98 (1 H, s), 3.74 – 3.60 (2 H, m), 3.58 – 3.50 (2 H, m), 1.91 – 1.83 (4 H, m).

## Step 4

To a vigorously stirred suspension of *N*-formyl amino acid (1.70 g, 9.0 mmol) and sodium borohydride (0.95 g, 25.2 mmol) in anhydrous THF (25 mL) was added a solution of iodine (2.74 g, 10.8 mmol) in anhydrous THF (10 mL) dropwise at 0 °C. Once gas evolution had ceased the mixture was heated at reflux for 18 hours and subsequently cooled to room temperature. Methanol was added cautiously until the solution became clear and the solvent was subsequently removed *in vacuo* to afford a white paste. The paste was dissolved in the minimum amount of 20% aqueous  $\text{KOH}$  (ca. 7 mL) and stirred at room temperature for 1 hour. The mixture was diluted with 20% aqueous  $\text{KOH}$  (15 mL) and extracted with  $\text{CH}_2\text{Cl}_2$  (3 x 40 mL). The organics were combined, dried over  $\text{MgSO}_4$  and removed *in vacuo* to give the crude amino alcohol as a yellow oil (0.50 g, 39%) which was used in the next step without further purification.  $^1\text{H}$  NMR (400 MHz,  $\text{CDCl}_3$ )  $\delta$ : 3.75 – 3.62 (4 H, m), 3.43 (2 H, s), 2.30 (3 H, s), 1.62 – 1.54 (4 H, m).

## Step 5

To a solution of crude amino alcohol (0.49 g, 3.0 mmol) in anhydrous  $\text{CH}_2\text{Cl}_2$  (30 mL) was added triethylamine (0.9 mL, 6.2 mmol) and trimethylacetyl chloride (0.42 mL, 3.4 mmol) dropwise at 0 °C. The reaction mixture was warmed to room temperature over 16 hours and quenched by the addition of saturated aqueous  $\text{NaHCO}_3$  (20 mL). The organic layer was separated and washed with additional saturated aqueous  $\text{NaHCO}_3$  (2 x 20 mL), brine (20 mL) and dried over  $\text{MgSO}_4$ . The solvent was removed *in vacuo* and the crude oil purified by flash column chromatography (EtOAc) to afford the product as a colourless oil (0.25 g, 33%). IR  $\nu_{\text{max}}/\text{cm}^{-1}$  (film): 2956, 2867, 1727, 1480, 1463, 1397, 1364, 1282, 1238, 1151, 1110, 1091, 1033.  $^1\text{H}$  NMR (400 MHz,  $\text{CDCl}_3$ )  $\delta$ : 3.90 (2 H, s), 3.73 (2 H, app td,  $J = 2.8, 11.3$  Hz), 3.58 (2 H, dt,  $J = 4.3, 11.5$  Hz), 2.21 (3 H, s), 1.53 (2 H, ddd,  $J = 4.3, 10.0, 14.3$  Hz), 1.45 – 1.41 (2 H, m), 1.15 (9 H, s), 1.02 (1 H, br s).  $^{13}\text{C}$  NMR (101 MHz,  $\text{CDCl}_3$ )  $\delta$ : 178.2, 66.9, 63.0, 51.9, 39.0, 32.5, 27.8, 27.2.  $m/z$  HRMS found  $[\text{M} + \text{H}]^+$  246.1521,  $\text{C}_{12}\text{H}_{24}\text{O}_2\text{NS}$  requires 246.1522

### (4-(methylamino)-1-tosylpiperidin-4-yl)methyl pivalate (1q)

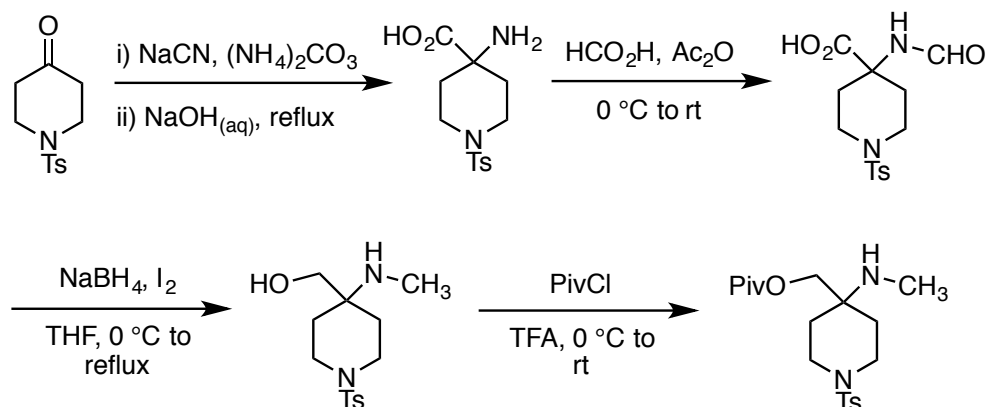

## Step 1

1-tosyl-4-piperidone<sup>5</sup> (4.0 g, 15.8 mmol), sodium cyanide (0.85 g, 17.4 mmol), and ammonium carbonate (3.5 g, 75.8 mmol) were suspended in ethanol/water (1:1, 50 mL) and heated at 60 °C for 16 hours. The solution was cooled to room temperature and the resulting precipitate was collected by vacuum filtration, washed with water (50 mL) and dried under vacuum to afford the desired product as a white solid (5.0 g, 98%) which was used directly in the next step without further purification.  $^1\text{H}$  NMR (400 MHz,  $(\text{CD}_3)_2\text{SO}$ )  $\delta$ : 10.66 (1 H, br s), 8.42 (1 H, s), 7.63 (2 H, d,  $J = 8.0$  Hz), 7.46 (2 H, d,  $J = 8.0$  Hz), 3.50 – 3.42 (2 H, m), 2.79 – 2.70 (2 H, m), 2.42 (3 H, s), 1.92 – 1.75 (2 H, m), 1.69 – 1.56 (2 H, m).

<sup>5</sup> Pagenkopf, B. L.; Moustafa, M. *Org. Lett.*, **2010**, *12*, 3168

## Step 2

Crude hydantoin (5.0 g, 15.5 mmol) was suspended in aqueous sodium hydroxide (5 M, 25 mL) and heated at 120 °C for 24 hours. The solution was cooled to room temperature and the solid removed by filtration. The mother liquor was acidified to pH = 6 and the resulting solid removed by vacuum filtration to afford the product as a white solid (3.81 g, 85%). <sup>1</sup>H NMR (400 MHz, CD<sub>3</sub>OD) δ: 7.70 (2 H, d, *J* = 8.2 Hz), 7.45 (2 H, d, *J* = 8.2 Hz), 3.37 – 3.32 (2 H, m), 3.28 – 3.21 (2 H, m), 2.46 (3 H, s), 2.32 – 2.20 (2 H, m), 1.85 (2 H, m).

## Step 3

Acetic anhydride (4 mL) was added dropwise to a solution of crude amino acid (1.40 g, 4.7 mmol) in formic acid (> 95%, 10 mL) at room temperature. After the addition was complete the reaction mixture was stirred for 1 hour and quenched by the addition of ice water (10 mL). The solvent was removed *in vacuo* to give the crude *N*-formyl amino acid which was used directly in the next step without further purification (1.43 g, 93%). <sup>1</sup>H NMR (400 MHz, (CD<sub>3</sub>)<sub>2</sub>SO) δ: 7.85 (1 H, s), 7.63 (2 H, d, *J* = 8.2 Hz), 7.45 (4 H, d, *J* = 8.2 Hz), (4 H, obscured), 2.41 (3 H, s), 2.05 – 1.97 (2 H, m), 1.94 – 1.86 (2 H, m).

## Step 4

To a vigorously stirred suspension of *N*-formyl amino acid (1.35 g, 4.1 mmol) and sodium borohydride (0.44 g, 11.6 mmol) in anhydrous THF (11 mL) was added a solution of iodine (1.26 g, 4.8 mmol) in anhydrous THF (5 mL) dropwise at 0 °C. Once gas evolution had ceased the mixture was heated at reflux for 18 hours and subsequently cooled to room temperature. Methanol was added cautiously until the solution became clear and the solvent was subsequently removed *in vacuo* to afford a white paste. The paste was dissolved in the minimum amount of 20% aqueous KOH (ca. 5 mL) and stirred at room temperature for 1 hour. The mixture was diluted with 20% aqueous KOH (10 mL) and extracted with CH<sub>2</sub>Cl<sub>2</sub> (3 x 20 mL). The organics were combined, dried over MgSO<sub>4</sub> and removed *in vacuo* to give the crude amino alcohol as a white solid (0.52 g, 42%) which was used in the next step without further purification <sup>1</sup>H NMR (400 MHz, CDCl<sub>3</sub>) δ: 7.64 (2 H, d, *J* = 8.1 Hz), 7.32 (2 H, d, *J* = 8.1 Hz), 3.29 (2 H, d, *J* = 5.0 Hz), 3.25 – 3.16 (2 H, m), 2.94 – 2.81 (2 H, m), 2.45 (3 H, s), 2.18 (3 H, s), 1.63 – 1.54 (4 H, m).

## Step 5

A 10 mL round-bottomed flask was charged with crude amino alcohol (0.50 g, 1.7 mmol) and cooled in an ice bath. Trifluoroacetic acid (1 mL) was added dropwise with vigorous stirring to afford a viscous solution. The reaction mixture was stirred at 0 °C for 5 minutes and trimethylacetyl chloride (0.30 mL, 2.5 mmol) was added dropwise. The flask was sealed with a glass-stopper and warmed to

room temperature over 16 hours. The solvent was removed *in vacuo*, the residue was dissolved in diethyl ether (10 mL) and treated with triethylamine until pH = 9. Water (10 mL) was added and the layers were separated and the aqueous was extracted with diethyl ether (3 x 10 mL). The organics were combined, dried over MgSO<sub>4</sub> and removed *in vacuo*. The crude product was purified by flash column chromatography (30% EtOAc in CH<sub>2</sub>Cl<sub>2</sub>) to afford the product as a white solid (0.26 g, 41%). IR  $\nu_{\text{max}}/\text{cm}^{-1}$  (film): 2971, 2862, 1722, 1661, 1598, 1475, 1461, 1432, 1398, 1347, 1330, 1281, 1246, 1160, 1090. <sup>1</sup>H NMR (400 MHz, CDCl<sub>3</sub>)  $\delta$ : 7.59 (2 H, d, *J* = 8.1 Hz), 7.27 (2 H, d, *J* = 8.1 Hz), 3.82 (2 H, s), 3.43 – 3.33 (2 H, m), 2.79 – 2.70 (2 H, m), 2.38 (3 H, s), 2.09 (3 H, s), 1.58 – 1.51 (4 H, m), 1.14 (9 H, s), 0.96 (1 H, br s). <sup>13</sup>C NMR (101 MHz, CDCl<sub>3</sub>)  $\delta$ : 177.9, 143.3, 133.6, 129.6, 127.5, 66.7, 51.8, 41.2, 38.9, 31.1, 27.5, 27.1, 21.4. *m/z* HRMS found [M + H]<sup>+</sup> 383.1997, C<sub>19</sub>H<sub>31</sub>O<sub>4</sub>N<sub>2</sub>S requires 383.1999.

### 2-ethyl-2-(methylamino)butyl pivalate (1r)

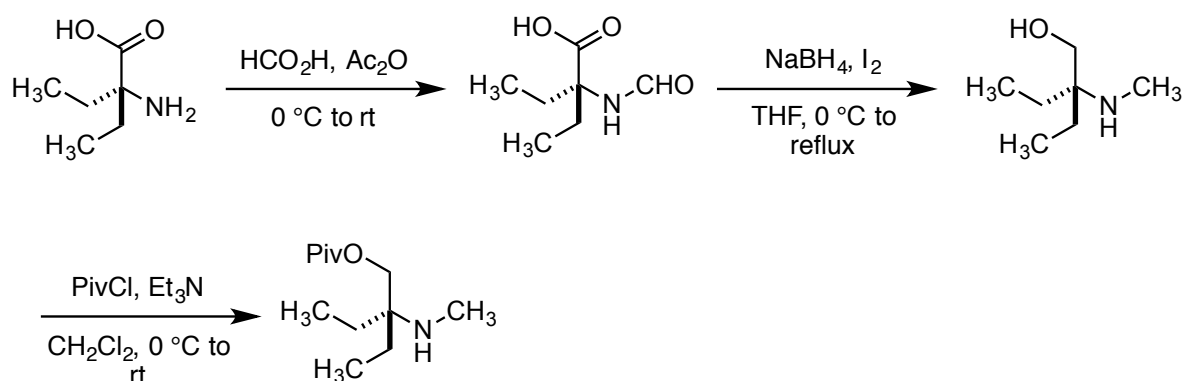

#### Step 1

Acetic anhydride (10 mL) was added drop-wise to a solution of 2-amino-2-ethylbutanoic acid (2.00 g, 15.2 mmol) in formic acid (> 95%, 32 mL) at 0 °C. After the addition was complete the reaction mixture allowed to warm to room temperature, stirred for 14 h and quenched by the addition of ice water (10 mL). The solvent was removed *in vacuo* to give the crude *N*-formyl amino acid as a white solid which was used directly in the next step without further purification (2.01 g, 87%). <sup>1</sup>H NMR (400 MHz, (CD<sub>3</sub>)<sub>2</sub>SO)  $\delta$ : 8.24 (1 H, s), 1.77 – 1.57 (4 H, m), 0.85 (6 H, t, *J* = 7.5 Hz).

#### Step 2

In a 3-necked flask, to a vigorously stirred suspension of *N*-formyl amino acid (2.01 g, 13.2 mmol) and sodium borohydride (1.40 g, 37.0 mmol) in anhydrous THF (35 mL) was added a solution of iodine (4.01 g, 15.8 mmol) in anhydrous THF (15 mL) dropwise at 0 °C. Once gas evolution had ceased the mixture was heated at reflux for 18 hours and subsequently cooled to room temperature. MeOH was added cautiously until the solution became clear and the solvent was subsequently

removed *in vacuo* to afford a white paste. The paste was dissolved in 20% aqueous KOH (30 mL) and stirred at room temperature for 1.5 h. The mixture was extracted with CH<sub>2</sub>Cl<sub>2</sub> (3 x 40 mL). The organics were combined, washed with brine (40 mL), dried over MgSO<sub>4</sub> and concentrated *in vacuo* to give the crude amino alcohol as a colourless oil (0.901 g, 52%) which was used in the next step without further purification. <sup>1</sup>H NMR (400 MHz, CDCl<sub>3</sub>) δ: 3.29 (2 H, s), 2.22 (3 H, s), 1.58 – 1.51 (4 H, m), 0.93 (6 H, t, *J* = 7.3 Hz).

### Step 3

2-ethyl-2-(methylamino)butan-1-ol (0.90 g, 6.86 mmol) was dissolved in CH<sub>2</sub>Cl<sub>2</sub> (10 mL) and cooled to 0 °C. Triethylamine (1.91 mL, 13.72 mmol) was added followed by dropwise addition of trimethylacetyl chloride (1.01 mL, 8.23 mmol). The reaction mixture was allowed to warm slowly to ambient temperature and stirred for 16 hours after which it was quenched with water (10 mL) and extracted with CH<sub>2</sub>Cl<sub>2</sub> (2 x 10 mL). The combined organic phases were washed with brine, dried (MgSO<sub>4</sub>) and concentrated *in vacuo*. The resulting residue was purified by flash column chromatography (30% EtOAc in P.E.) to afford the title compound as a light yellow oil (0.119 g, 8%). IR  $\nu_{\text{max}}$ /cm<sup>-1</sup> (film): 2965, 2880, 1730, 1646, 1515, 1480, 1461, 1397, 1365, 1281, 1150, 1034; <sup>1</sup>H NMR (400 MHz, CDCl<sub>3</sub>) δ: 3.94 (2 H, s), 2.30 (3 H, s), 1.45 (4 H, qq, *J* = 14.5, 7.4 Hz), 1.22 (9 H, s), 0.85 (6 H, t, *J* = 7.5 Hz); <sup>13</sup>C NMR (101 MHz, CDCl<sub>3</sub>) δ: 178.4, 65.3, 57.7, 39.1, 28.0, 27.3, 25.3, 7.4; *m/z* HRMS found [M + H]<sup>+</sup> 216.1957, C<sub>12</sub>H<sub>27</sub>NO<sub>2</sub> requires 216.1958.

### N-(2-(1-(methylamino)cyclohexyl)ethyl)phthalimide (1s)

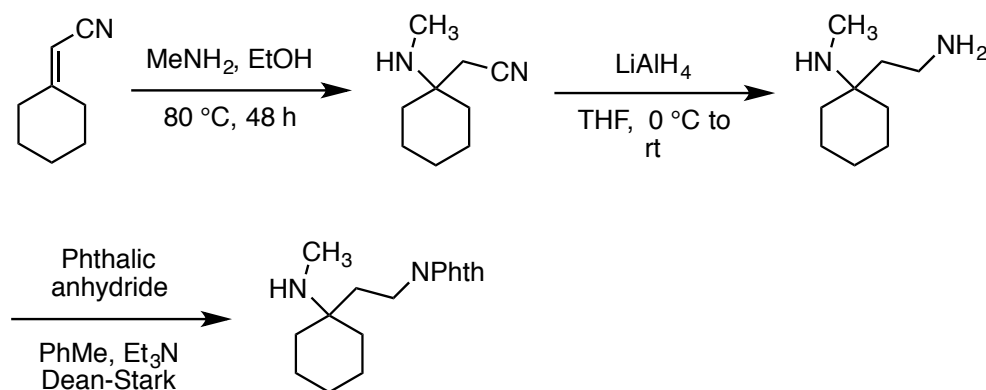

### Step 1

A solution of 2-cyclohexylideneacetonitrile<sup>6</sup> (1.89 g, 15.7 mmol) in ethanol (2 mL) and methylamine (33% w/w in EtOH, 3.9 mL, 31.3 mmol) were stirred at 80 °C in a sealed tube for 48 hours. After such time the solution was cooled to room temperature and the solvent removed *in vacuo*. The crude

<sup>6</sup> Karagiozov, S. K.; Abbott, F. S. *Synth. Commun.*, **2004**, 34, 871

oil was purified by flash column chromatography (100% EtOAc) to provide the desired amine as a colorless oil (1.45 g, 61%).  $^1\text{H}$  NMR (400 MHz,  $\text{CDCl}_3$ )  $\delta$ : 2.43 (2 H, s), 2.29 (3 H, s), 1.66 – 1.23 (10 H, m), 1.18 (1 H, br s (N-H)).

## Step 2

To a solution of ethyl 2-(1-(methylamino)cyclohexyl)acetonitrile (1.45 g, 9.5 mmol) in anhydrous  $\text{Et}_2\text{O}$  (50 mL) was added  $\text{LiAlH}_4$  (0.90 g, 23.8 mmol) portionwise at 0 °C and then heated at reflux for 16 hours. The resulting solution cooled to warm to room temperature and was quenched successively with  $\text{H}_2\text{O}$  (1 mL), 10%  $\text{NaOH}$  (1.3 mL) and  $\text{H}_2\text{O}$  (2.5 mL). The resulting slurry was stirred with  $\text{MgSO}_4$  and filtered. The filter cake was washed with hot  $\text{CH}_2\text{Cl}_2$  (100 mL). The filter cake was then removed and heated to 100 °C in 10%  $\text{NaOH}$  (100 mL) for 2 hours. The mixture was cooled to room temperature, filtered and the solution extracted with  $\text{CH}_2\text{Cl}_2$  (3 x 100 mL). The combined organics were dried over  $\text{K}_2\text{CO}_3$  and removed *in vacuo* to afford the crude diamine as a colorless oil (1.16 g, 78%) which was used without further purification.  $^1\text{H}$  NMR (400 MHz,  $\text{CDCl}_3$ )  $\delta$ : 2.72 (2 H, t,  $J = 8.0$  Hz), 2.26 (3 H, s), 1.54 – 1.41 (10 H, m), 1.37 – 1.29 (4 H, m).

## Step 3

The crude diamine (1.16 g, 7.5 mmol), phthalic anhydride (1.10 g, 7.5 mmol) and triethylamine (1.04 mL, 7.5 mmol) were heated under Dean-Stark conditions in toluene (10 mL) for 6 hours. The solution was cooled to room temperature and the solvent removed *in vacuo* and the resulting oil purified by flash column chromatography (gradient elution: 1% MeOH in  $\text{CH}_2\text{Cl}_2$  to 5% MeOH in  $\text{CH}_2\text{Cl}_2$ ) to provide the desired amine as a pale red viscous oil (1.53 g, 72%). IR  $\nu_{\text{max}}/\text{cm}^{-1}$  (film): 3351 (br), 2927, 2854, 2799, 1770, 1706, 1641, 1615, 1559, 1466, 1443, 11396, 1367, 1223, 1187, 1159, 1131.  $^1\text{H}$  NMR (400 MHz,  $\text{CDCl}_3$ )  $\delta$ : 7.79 (2 H, dd,  $J = 3.1, 5.4$  Hz), 7.66 (2 H, dd,  $J = 3.1, 5.4$  Hz), 3.71 – 3.66 (2 H, m), 2.32 (3 H, s), 1.70 – 1.66 (2 H, m), 1.52 – 1.32 (10 H, m).  $^{13}\text{C}$  NMR (101 MHz,  $\text{CDCl}_3$ )  $\delta$  168.5, 133.9, 132.4, 123.1, 53.1, 35.1, 34.2, 33.2, 27.5, 26.1, 21.7.  $m/z$  HRMS found  $[\text{M} + \text{H}]^+$  287.1754,  $\text{C}_{17}\text{H}_{23}\text{O}_2\text{N}_2$  requires 287.1754.

## (1-(methylamino)cycloheptyl)methyl pivalate (1t)

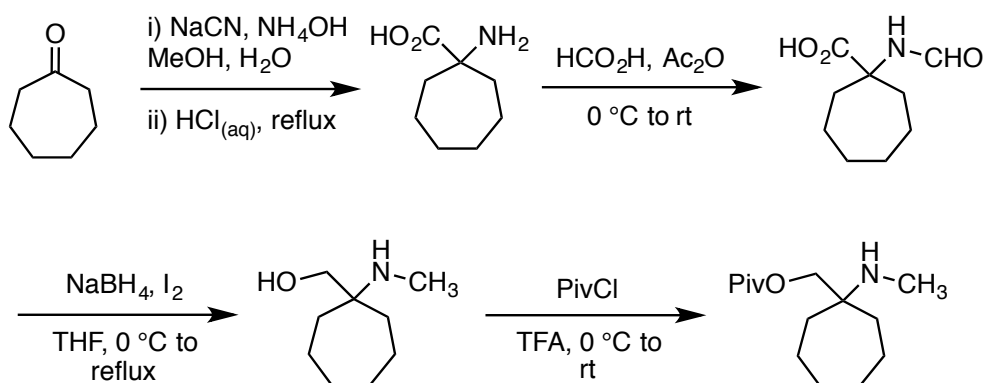

### Step 1

A solution of cycloheptanone (2.38 mL, 21.2 mmol) in methanol (12.5 mL) was added to a vigorously stirred solution of sodium cyanide (1.07 g, 21.2 mmol), ammonium hydroxide solution (35%, 7.0 mL) and ammonium chloride (1.25 g, 23.3 mmol) in H<sub>2</sub>O (4.2 mL) at room temperature. The reaction mixture was stirred for 16 h, diluted with CH<sub>2</sub>Cl<sub>2</sub> (15 mL) and the organic layer separated. The aqueous was extracted with CH<sub>2</sub>Cl<sub>2</sub> (2 x 15 mL), the organics were combined, dried over MgSO<sub>4</sub> and removed *in vacuo*. The resulting product was obtained as colourless oil (quantitative yield) and used without further purification. <sup>1</sup>H NMR (400 MHz, CDCl<sub>3</sub>) δ: 2.10 – 2.00 (4 H, m), 1.77 – 1.51 (8 H, m).

### Step 2

The crude product was treated with conc. HCl (70 mL) and water (35 mL) and refluxed for 16 hours. The reaction mixture was subsequently cooled to room temperature and the solvent removed *in vacuo*. The resulting solid was dissolved in the minimum amount of water (80 °C) and was treated with 10% aqueous NaOH until pH = 6. The mixture was cooled to 0 °C and the resulting precipitate removed by vacuum filtration to afford the product as a white crystalline solid (1.75 g, 53%). (If no precipitate is formed the solvent is removed *in vacuo*, the residue taken up in ethanol and filtered, and the resulting filtrate removed *in vacuo* to afford the product). <sup>1</sup>H NMR (400 MHz, D<sub>2</sub>O) 2.24 – 2.15 (2 H, m), 1.86 – 1.78 (2 H, m), 1.78 – 1.70 (2 H, m), 1.65 – 1.54 (6 H, m).

### Step 3

Acetic anhydride (8 mL) was added dropwise to a solution of crude amino acid (1.70 g, 10.8 mmol) in formic acid (> 95%, 22 mL) at room temperature. After the addition was complete the reaction mixture was stirred for an additional hour and quenched by the addition of ice water (10 mL). The solvent was removed *in vacuo* to give the crude *N*-formyl amino acid which was used directly in the next step without further purification (1.66 g, 83%). <sup>1</sup>H NMR (400 MHz, (CD<sub>3</sub>)<sub>2</sub>SO) δ: 7.86 (1 H, s), 2.03 – 1.84 (4 H, m), 1.53 – 1.42 (8 H, m).

### Step 4

To a vigorously stirred suspension of *N*-formyl amino acid (1.60 g, 8.6 mmol) and sodium borohydride (0.92 g, 24.2 mmol) in anhydrous THF (36 mL) was added a solution of iodine (2.36 g, 10.4 mmol) in anhydrous THF (10 mL) dropwise at 0 °C. Once gas evolution had ceased the mixture was heated at reflux for 18 hours and subsequently cooled to room temperature. Methanol was added cautiously until the solution became clear and the solvent was subsequently removed *in vacuo* to afford a white paste. The paste was dissolved in the minimum amount of 20% aqueous KOH (ca. 7 mL) and stirred at room temperature for 1 hour. The mixture was diluted with 20% aqueous KOH (15

mL) and extracted with CH<sub>2</sub>Cl<sub>2</sub> (3 x 40 mL). The organics were combined, dried over MgSO<sub>4</sub> and removed *in vacuo* to give the crude amino alcohol as a colorless oil (1.29 g, 95%) which was used in the next step without further purification <sup>1</sup>H NMR (400 MHz, CDCl<sub>3</sub>) δ: 3.28 (2 H, s), 2.28 (3 H, s), 1.61 – 1.41 (12 H, m).

## Step 5

A 10 mL round-bottomed flask was charged with crude amino alcohol (0.36 g, 2.3 mmol) and cooled in an ice bath. Trifluoroacetic acid (1.2 mL) was added dropwise with vigorous stirring to afford a viscous solution. The reaction mixture was stirred at 0 °C for 5 minutes and trimethylacetyl chloride (0.43 mL, 3.5 mmol) was added dropwise. The flask was sealed with a glass-stopper and warmed to room temperature over 16 hours. The solvent was removed *in vacuo*, the residue was dissolved in diethyl ether (10 mL) and treated with triethylamine until pH = 9. Water (10 mL) was added and the layers were separated and the aqueous was extracted with diethyl ether (3 x 10 mL). The organics were combined, dried over MgSO<sub>4</sub> and removed *in vacuo*. The crude product was purified by SCX column, loaded in methanol, washed with methanol and eluted with ammonia in methanol solution (2 M) to afford the product as a colourless oil (0.24 g, 75%). IR  $\nu_{\text{max}}/\text{cm}^{-1}$  (film): 2925, 2856, 2802, 1727, 1480, 1463, 1397, 1463, 1397, 1364, 1282, 1154. <sup>1</sup>H NMR (400 MHz, CDCl<sub>3</sub>) δ: 3.86 (2 H, s), 2.22 (3 H, s), 1.54 – 1.37 (13 H, m), 1.17 (9 H, s). <sup>13</sup>C NMR (101 MHz, CDCl<sub>3</sub>) δ: 178.4, 67.3, 57.7, 39.0, 35.3, 30.6, 28.5, 27.3, 22.5. m/z HRMS found [M + H]<sup>+</sup> 242.2112, C<sub>14</sub>H<sub>28</sub>O<sub>2</sub>N requires 242.2115.

## (1-(methylamino)cyclopentyl)methyl pivalate (1u)

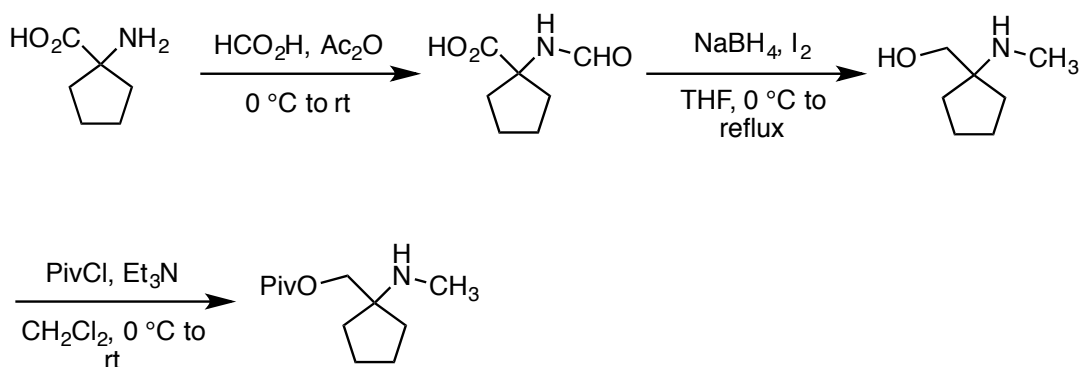

## Step 1

Acetic anhydride (12 mL) was added dropwise to a solution of 1-aminocyclopentane-1-carboxylic acid (2.0 g, 15.5 mmol) in formic acid (> 95%, 30 mL) at room temperature. After the addition was complete the reaction mixture was stirred for an additional hour and quenched by the addition of ice water (10 mL). The solvent was removed *in vacuo* to give the crude *N*-formyl amino acid which was

used directly in the next step without further purification (quantitative yield).  $^1\text{H}$  NMR (400 MHz,  $(\text{CD}_3)_2\text{SO}$ )  $\delta$ : 7.89 (1 H, s), 2.11 – 1.92 (2 H, m), 1.92 – 1.83 (2 H, m), 1.73 – 1.59 (4 H, m).

## Step 2

To a vigorously stirred suspension of *N*-formyl amino acid (2.4 g, 15.4 mmol) and sodium borohydride (1.87 g, 49.5 mmol) in anhydrous THF (40 mL) was added a solution of iodine (4.7 g, 18.6 mmol) in anhydrous THF (20 mL) dropwise at 0 °C. Once gas evolution had ceased the mixture was heated at reflux for 18 hours and subsequently cooled to room temperature. Methanol was added cautiously until the solution became clear and the solvent was subsequently removed *in vacuo* to afford a white paste. The paste was dissolved in the minimum amount of 20% aqueous KOH (ca. 10 mL) and stirred at room temperature for 1 hour. The mixture was diluted with 20% aqueous KOH (20 mL) and extracted with  $\text{CH}_2\text{Cl}_2$  (3 x 50 mL). The organics were combined, dried over  $\text{MgSO}_4$  and removed *in vacuo* to give the crude amino alcohol as a colorless oil (1.96 g, 97%) which was used in the next step without further purification  $^1\text{H}$  NMR (400 MHz,  $\text{CDCl}_3$ )  $\delta$ : 3.40 (2 H, s), 2.33 (3 H, s), 1.65 – 1.51 (8 H, m).

## Step 3

To a solution of crude amino alcohol (1.94 g, 15.0 mmol) in anhydrous  $\text{CH}_2\text{Cl}_2$  (150 mL) was added triethylamine (4.2 mL, 30.0 mmol) and trimethylacetyl chloride (2.0 mL, 16.5 mmol) dropwise at 0 °C. The reaction mixture was warmed to room temperature over 16 hours and quenched by the addition of saturated aqueous  $\text{NaHCO}_3$  (100 mL). The organic layer was separated and washed with additional saturated aqueous  $\text{NaHCO}_3$  (2 x 100 mL), brine (100 mL) and dried over  $\text{MgSO}_4$ . The solvent was removed *in vacuo* and the crude oil purified by flash column chromatography (EtOAc) to afford the product as a colourless oil (0.23 g, 7%). IR  $\nu_{\text{max}}/\text{cm}^{-1}$  (film): 2958, 2871, 2798, 1728, 1480, 1397, 1365, 1331, 1283, 1151, 1096, 1034.  $^1\text{H}$  NMR (400 MHz,  $\text{CDCl}_3$ )  $\delta$ : 3.94 (2 H, s), 2.25 (3 H, s), 1.73 – 1.63 (2 H, m), 1.59 – 1.50 (4 H, m), 1.48 0- 1.41 (3 H, m), 1.16 (9 H, s).  $^{13}\text{C}$  NMR (101 MHz,  $\text{CDCl}_3$ )  $\delta$ : 178.4, 66.8, 64.4, 38.9, 34.8, 29.5, 27.3, 24.7.  $m/z$  HRMS found  $[\text{M} + \text{H}]^+$  214.1799,  $\text{C}_{12}\text{H}_{24}\text{O}_2\text{N}$  requires 214.1802

## *N*-methyl-1-(2-((triisopropylsilyl)oxy)ethyl)cyclobutan-1-amine (1v)

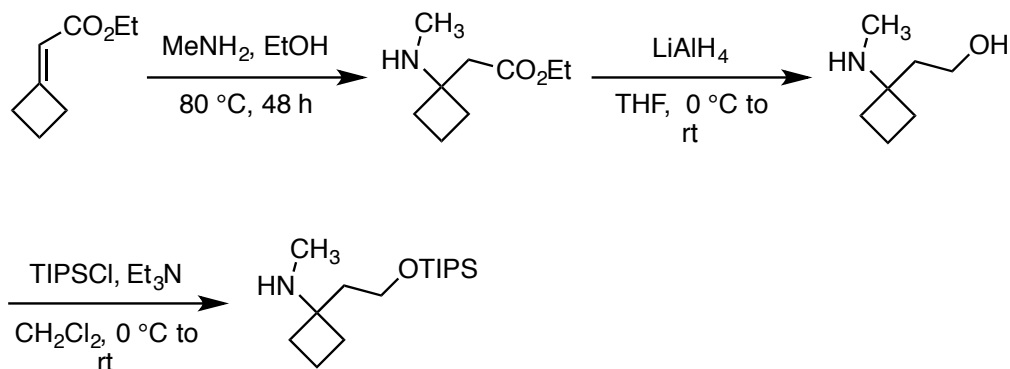

### Step 1

A solution of ethyl 2-cyclobutylideneacetate<sup>7</sup> (2.80 g, 20 mmol) and methylamine (33% w/w in EtOH, 4.98 mL, 40 mmol) were stirred at 80 °C in a sealed tube for 48 hours. After such time the solution was cooled to room temperature and the solvent removed *in vacuo* to afford the product as a colourless oil (3.13 g, 92%) which was used in the next step without further purification. <sup>1</sup>H NMR (400 MHz, CDCl<sub>3</sub>) δ: 4.10 (2 H, q, *J* = 7.1 Hz), 2.59 (2 H, s), 2.27 (3 H, s), 2.04 – 1.97 (2 H, m), 1.93 – 1.85 (2 H, m), 1.87 – 1.65 (3 H, m, (N-H)), 1.23 (3 H, t, *J* = 7.1 Hz).

### Step 2

To a solution of ethyl 2-(1-(methylamino)cyclobutyl)acetate (3.13 g, 18.3 mmol) in anhydrous THF (60 mL) was added LiAlH<sub>4</sub> (1.39 g, 36.6 mmol) portionwise at 0 °C. The resulting solution was allowed to warm to room temperature over 16 hours and quenched successively with H<sub>2</sub>O (1.5 mL), 10% NaOH (2 mL) and H<sub>2</sub>O (4 mL). The resulting slurry was stirred with MgSO<sub>4</sub> and filtered. The filter cake was washed with Et<sub>2</sub>O (100 mL) and the combined organics removed *in vacuo* to afford the crude amino alcohol in quantitative yield, which was used without further purification. <sup>1</sup>H NMR (400 MHz, CDCl<sub>3</sub>) δ: 3.79 (2 H, t, *J* = 5.3 Hz), 2.29 (3 H, s), 1.97 – 1.70 (8 H, m).

### Step 3

Triisopropylsilyl chloride (0.89 mL, 4.18 mmol) was added dropwise to a solution of amino alcohol (0.56 g, 4.4 mmol) and triethylamine (0.92 mL, 6.6 mmol) in anhydrous CH<sub>2</sub>Cl<sub>2</sub> (20 mL) at 0 °C. The resulting solution was allowed to warm to room temperature over 16 hours and was quenched with H<sub>2</sub>O (20 mL). The organics were separated and washed with additional H<sub>2</sub>O (2 x 20 mL) and brine (20 mL), dried over Na<sub>2</sub>SO<sub>4</sub> and removed *in vacuo*. The crude oil was purified by flash column chromatography (gradient elution: 1% MeOH in CH<sub>2</sub>Cl<sub>2</sub> to 5% MeOH in CH<sub>2</sub>Cl<sub>2</sub>) to provide the desired amine as colorless oil (0.55 g, 44%). IR ν<sub>max</sub>/cm<sup>-1</sup> (film): 2941, 2866, 1463, 1383, 1246, 1161, 1093, 1068, 1030. <sup>1</sup>H NMR (400 MHz, CDCl<sub>3</sub>) δ: 3.79 (2 H, t, *J* = 6.9 Hz), 2.41 (1 H, br s), 2.29 (3 H, s), 2.03 – 1.96 (2 H, m), 1.91 – 1.85 (4 H, m), 1.80 – 1.68 (2 H, m), 1.12 – 1.04 (21 H, m). <sup>13</sup>C NMR (125 MHz, CDCl<sub>3</sub>) δ 60.2, 59.4, 38.6, 32.1, 28.8, 18.2, 13.7, 12.1. *m/z* HRMS found [M + H]<sup>+</sup> 286.2559, C<sub>16</sub>H<sub>36</sub>ONSi requires 286.2561

---

<sup>7</sup> Afzal, M.; Walton, John C. *J. Chem. Soc., Perkin Trans. 2*, **1999**, 5, 937

***endo*-2-(methylamino)norbornane-2-methyl pivalate (1w)**

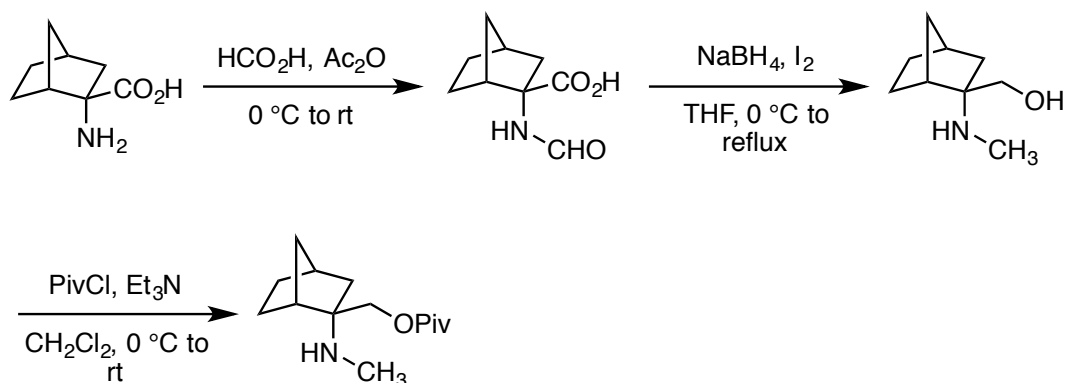

**Step 1**

Acetic anhydride (2.94 mL, 31.1 mmol) was added dropwise to a solution of *endo*-2-amino-2-norbornanecarboxylic acid (0.65 g, 4.19 mmol) in formic acid (>95%, 8.7 mL) at 0 °C. The resulting solution was allowed to stir at room temperature for 1 hour and quenched with ice water (6 mL). The solvent was removed *in vacuo* to give the crude *N*-formyl amino acid (0.72 g) which was used directly in the next step without further purification. <sup>1</sup>H NMR (400 MHz, (CD<sub>3</sub>)<sub>2</sub>SO) δ: 7.92 (1 H, s), 2.65 (1 H, d, *J* = 3.5 Hz), 2.17 – 2.10 (2 H, m), 2.07 (1 H, d, *J* = 10.0 Hz), 1.59 – 1.45 (2 H, m), 1.36 – 2.44 (3 H, m), 1.19 – 1.12 (1 H, m).

**Step 2**

To a vigorously stirred suspension of *N*-formyl amino acid (0.72 g, 3.9 mmol) and sodium borohydride (0.42 g, 11.1 mmol) in anhydrous THF (10 mL) was added a solution of iodine (1.17 g, 4.6 mmol) in anhydrous THF (5 mL) dropwise at 0 °C. Once gas evolution had ceased the mixture was heated at reflux for 18 hours and cooled to room temperature. Methanol was added cautiously until the solution became clear and the solvent was subsequently removed *in vacuo* to afford a white paste. The paste was dissolved in the minimum amount of 20% aqueous KOH (ca. 4 mL) and stirred at room temperature for 1 hour. The mixture was diluted with 20% aqueous KOH (10 mL) and extracted with CH<sub>2</sub>Cl<sub>2</sub> (3 x 15 mL). The organics were subsequently dried (Na<sub>2</sub>SO<sub>4</sub>) and removed *in vacuo* to give the crude amino alcohol as a colorless oil (0.55 g, 91%) which was used in the next step without further purification. <sup>1</sup>H NMR (400.1 MHz, CDCl<sub>3</sub>) δ 3.50 (1 H, d, *J* = 10.2 Hz), 3.24 (1 H, d, *J* = 10.5 Hz), 2.22 (3 H, s), 2.22 – 2.20 (1 H, m), 2.09 (1 H, d, *J* = 4.5 Hz), 1.68 (1 H, ddd, *J* = 3.1, 4.4, 13.0 Hz), 1.64 – 1.40 (3 H, m), 1.31 – 1.12 (3 H, m), 0.76 (1 H, dd, *J* = 2.7, 13.2 Hz).

### Step 3

To a solution of crude amino alcohol (0.55 g, 3.6 mmol) and 4-dimethylaminopyridine (22 mg, 0.18 mmol) in anhydrous  $\text{CH}_2\text{Cl}_2$  (8 mL) was added trimethylacetyl chloride (0.52 mL, 4.3 mmol) dropwise. The reaction mixture was cooled to 0 °C and triethylamine (1.15 mL, 4.3 mmol) was added dropwise and the solution allowed to warm to room temperature over 16 h. The reaction was then diluted with  $\text{CH}_2\text{Cl}_2$  (20 mL) and washed sequentially with water (2 x 30 mL), 0.1 M HCl (30 mL), sat.  $\text{NaHCO}_3$  (30 mL) and brine (30 mL). The organic phase was dried over  $\text{Na}_2\text{SO}_4$  and concentrated *in vacuo*. The crude oil was purified by flash column chromatography (gradient elution: 5% EtOAc in P.E. to 100% EtOAc) to provide the desired amine as colorless oil (0.19 g, 20%). IR  $\nu_{\text{max}}/\text{cm}^{-1}$  (film) 2950, 2870, 2800, 1727, 1480, 1467, 1443, 1397, 1364, 1328, 1313, 1282, 1152, 1101, 1064, 1036;  $^1\text{H}$  NMR (400 MHz,  $\text{CDCl}_3$ )  $\delta$ : 4.12 (1 H, d,  $J$  = 11.4 Hz), 3.91 (1 H, d,  $J$  = 11.4 Hz), 2.25 (3 H, s), 2.20 (1 H, app. t,  $J$  = 3.9 Hz), 2.10 (1 H, app. d,  $J$  = 2.6 Hz), 1.92 – 1.85 (1 H, m), 1.58 – 1.50 (2 H, m), 1.45 (1 H, ddd,  $J$  = 2.9, 4.4, 12.4 Hz), 1.37 – 1.24 (3 H, m), 1.21 (9 H, s), 0.93 (1 H, dd,  $J$  = 2.9, 12.6 Hz).  $^{13}\text{C}$  NMR (101 MHz,  $\text{CDCl}_3$ )  $\delta$ : 178.7, 65.3, 62.7, 42.1, 41.9, 39.1, 38.2, 36.9, 30.4, 29.0, 27.4, 22.8.  $m/z$  HRMS found  $[\text{M} + \text{H}]^+$  240.1959,  $\text{C}_{14}\text{H}_{26}\text{NO}_2$  requires 240.1958.

### *N*-(2-(1-tosyl-1H-indol-3-yl)ethyl)-1-(2-(((triisopropylsilyl)oxy)ethyl)cyclobutan-1-amine (1x)

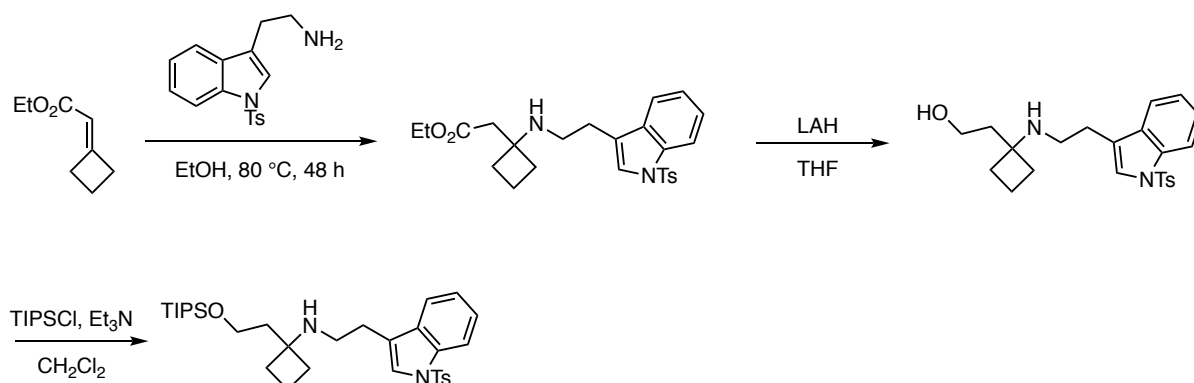

### Step 1

2-(1-tosyl-1H-indol-3-yl)ethan-1-amine<sup>8</sup> (4.21 g, 13.40 mmol) and ethyl 2-cyclobutylideneacetate<sup>4</sup> (0.94 g, 6.70 mmol) were combined in EtOH (5 mL) and heated at 80 °C in a sealed tube for 2 days. The reaction mixture was concentrated *in vacuo* and the residue purified by flash column chromatography (50% EtOAc in P.E.) to afford the title compound as a viscous yellow oil (3.00 g, 98%). IR  $\nu_{\text{max}}/\text{cm}^{-1}$  (film): 2979, 2936, 1726, 1446, 1367, 1274, 1241, 1170, 1118, 1095, 1019;  $^1\text{H}$  NMR (400 MHz,  $\text{CDCl}_3$ )  $\delta$ : 7.97 (1 H, d,  $J$  = 8.3 Hz), 7.75 (2 H, d,  $J$  = 8.3 Hz), 7.49 (1 H, d,  $J$  = 7.7 Hz), 7.40 (1 H, s), 7.29 (1 H, t,  $J$  = 7.7 Hz), 7.24 – 7.16 (3 H, m), 4.04 (2 H, q,  $J$  = 7.1 Hz), 2.83 (4 H, s), 2.61 (2 H, s), 2.31 (3 H, s), 1.98 – 1.69 (6 H, m), 1.17 (3 H, t,  $J$  = 7.1 Hz);  $^{13}\text{C}$  NMR (101 MHz,

<sup>8</sup> Logers, M.; Overman, L. E.; Welmaker, G. S.; *J. Am. Chem. Soc.*, **1995**, 9139.

CDCl<sub>3</sub>)  $\delta$ : 171.8, 144.8, 135.4, 135.3, 131.1, 129.9, 126.9, 124.7, 123.2, 123.1, 121.1, 119.6, 113.8, 60.2, 58.3, 41.6, 41.4, 32.3, 26.4, 21.6, 14.3, 13.8; *m/z* HRMS found  $[M + H]^+$  455.1988, C<sub>25</sub>H<sub>31</sub>N<sub>2</sub>O<sub>4</sub>S requires 455.1999.

## Step 2

Ethyl 2-(1-((2-(1-tosyl-1H-indol-3-yl)ethyl)amino)cyclobutyl)acetate (2.90 g, 6.40 mmol) was dissolved in THF (30 mL) and the solution cooled to 0 °C. Lithium aluminium hydride (0.968 g, 25.00 mmol) was added portion-wise and the solution allowed to warm to room temperature and stirred for 30 minutes. Water (1 mL) was added to the reaction carefully at 0 °C followed by the sequential addition of 10% aqueous NaOH solution (1 mL) and water (3 mL). MgSO<sub>4</sub> was added to the reaction mixture and the solution filtered through celite, eluting with Et<sub>2</sub>O, and concentrated *in vacuo* to afford the title compound as a white solid (2.04 g, 77%). <sup>1</sup>H NMR (400 MHz, CDCl<sub>3</sub>)  $\delta$ : 8.00 (1 H, d, *J* = 8.3 Hz), 7.76 (2 H, d, *J* = 8.4 Hz), 7.49 (1 H, d, *J* = 7.8 Hz), 7.37 (1 H, s), 7.40 – 7.29 (1 H, m), 7.25 – 7.17 (3 H, m), 3.86 – 3.77 (2 H, m), 2.90 – 2.84 (2 H, m), 2.83 – 2.77 (2 H, m), 2.33 (3 H, s), 1.97 – 1.57 (8 H, m); <sup>13</sup>C NMR (101 MHz, CDCl<sub>3</sub>)  $\delta$ : 145.0, 135.5, 135.4, 130.8, 130.0, 126.9, 125.0, 123.4, 123.3, 122.2, 119.5, 113.9, 60.7, 60.4, 41.0, 34.7, 33.0, 25.8, 21.7, 13.5.

## Step 3

2-(1-((2-(1-tosyl-1H-indol-3-yl)ethyl)amino)cyclobutyl)ethan-1-ol (1.90 g, 4.60 mmol) was dissolved in CH<sub>2</sub>Cl<sub>2</sub> (15 mL) and cooled to 0 °C. Triethylamine (0.96 mL, 6.90 mmol) was added followed by drop-wise addition of triisopropylsilyl chloride (0.94 mL, 4.37 mmol) and the solution was allowed to warm to room temperature overnight. The mixture was transferred to a separating funnel and diluted with CH<sub>2</sub>Cl<sub>2</sub>. The organic layer was washed sequentially with water (3 x 15 mL) then brine (15 mL), dried over MgSO<sub>4</sub> and concentrated *in vacuo*. The residue was purified by flash column chromatography (gradient elution: CH<sub>2</sub>Cl<sub>2</sub> to 15% MeOH in CH<sub>2</sub>Cl<sub>2</sub>) to afford the title compound as a light yellow solid (1.18 g, 45%). *m. p.*: 68–70 °C; IR  $\nu_{\text{max}}$ /cm<sup>-1</sup> (film): 2928, 2863, 1461, 1444, 1363, 1307, 1275, 1171, 1128, 1116, 1095; <sup>1</sup>H NMR (400 MHz, CDCl<sub>3</sub>)  $\delta$ : 7.99 (1 H, d, *J* = 8.3 Hz), 7.74 (2 H, app d, *J* = 8.4 Hz), 7.49 (1 H, d, *J* = 7.8 Hz), 7.37 (1 H, s), 7.31 (1 H, td, *J* = 8.3, 1.1 Hz), 7.24 – 7.18 (3 H, m), 3.75 (2 H, t, *J* = 7.0 Hz), 2.81 (4 H, s), 2.33 (3 H, s), 1.88 (4 H, t, *J* = 7.0 Hz), 1.85 – 1.76 (2 H, m), 1.74 – 1.63 (2 H, m), 1.08 – 1.02 (21 H, m); <sup>13</sup>C NMR (101 MHz, CDCl<sub>3</sub>)  $\delta$ : 144.9, 135.5, 135.5, 131.1, 129.9, 126.9, 124.8, 123.3, 123.2, 121.2, 119.6, 113.9, 60.2, 58.9, 41.8, 33.0, 26.5, 21.7, 18.2, 17.9, 13.8, 12.1; *m/z* HRMS found  $[M + H]^+$  569.3216, C<sub>32</sub>H<sub>49</sub>N<sub>2</sub>O<sub>3</sub>SSi requires 569.3228.

***N*-methyl-1-tosyl-3-(2-(((triisopropylsilyl)oxy)ethyl)piperidin-3-amine (1y)**

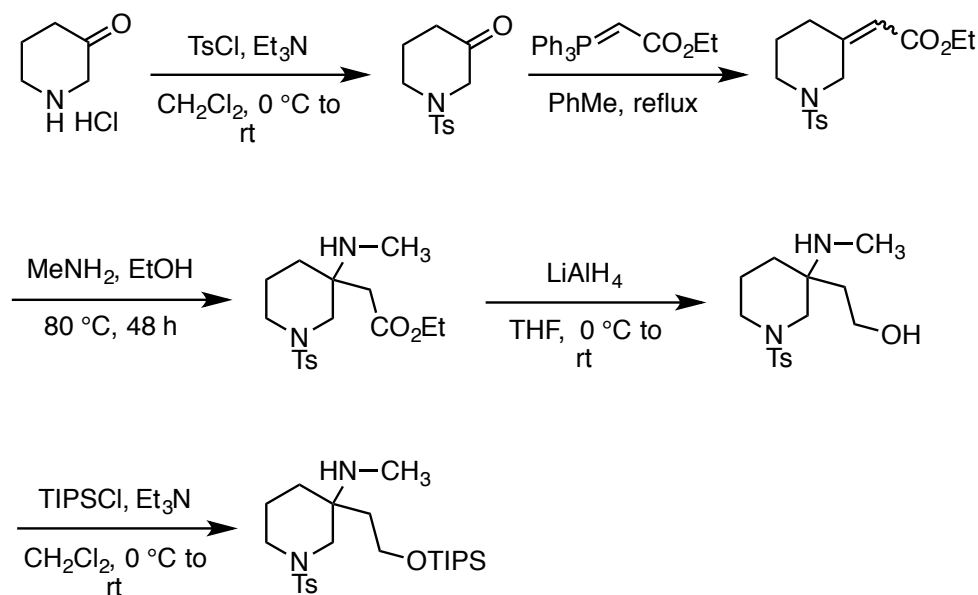

**Step 1**

Tosyl chloride (1.30 g, 6.8 mmol) was added portionwise to a solution of 3-piperidone hydrochloride hydrate (1.00 g, 6.5 mmol) and triethylamine (2.7 mL, 19.5 mmol) in dichloromethane (25 mL) at 0 °C. The solution was allowed to warm to room temperature over 16 hours and was quenched with H<sub>2</sub>O (20 mL). The organic layer was separated, and the aqueous extracted with additional dichloromethane (2 x 15 mL). The organics were combined and washed with 1M HCl (50 mL), brine (50 mL), dried over K<sub>2</sub>CO<sub>3</sub> and removed *in vacuo* to afford the crude 1-tosyl-3-piperidone as a pale yellow solid which was used without further purification (1.37 g, 84%). <sup>1</sup>H NMR (400 MHz, CDCl<sub>3</sub>) δ: 7.64 (2 H, d, *J* = 8.2 Hz), 7.33 (2 H, d, *J* = 8.2 Hz), 3.58 (2 H, s), 3.27 (2 H, t, *J* = 6.0 Hz), 2.42 (3 H, s), 2.34 (2 H, t, *J* = 6.9 Hz), 2.02 – 1.96 (2 H, m).

**Step 2**

A solution of 1-tosyl-3-piperidone (2.30 g, 9.1 mmol) and ethyl (triphenylphosphoranylidene)acetate (3.48 g, 10 mmol) was refluxed in toluene (20 mL) for 24 hours. The solution was subsequently cooled to room temperature and the solvent removed *in vacuo*. The resulting product was dissolved in 2:1 EtOAc/P.E. (50 mL), filtered over a bed of silica and celite, and washed with additional 2:1 EtOAc/P.E. (100 mL). The solvent was removed *in vacuo* and the resulting oil purified by flash column chromatography (gradient elution: 5% EtOAc in P.E. to 30% EtOAc in P.E.) to provide the desired product (1.97 g, 67%) as an inseparable mixture of diastereoisomers with *E*-form and *Z*-form (1:1). <sup>1</sup>H NMR (400 MHz, CDCl<sub>3</sub>) δ: 7.69 – 7.63 (4 H, m), 7.33 – 7.29 (4 H, m), 5.77 (1 H, s), 5.68 (1 H, s), 4.28 (2 H, s), 4.21 – 4.11 (4 H, m), 3.54 (2 H, s), 3.20 (2 H, t, *J* = 5.0 Hz), 3.13 (2 H, t, *J* =

4.90), 2.79 (2 H, t,  $J = 5.6$  Hz), 2.43 (3 H, s), 2.42 (3 H, s), 2.21 (2 H, t,  $J = 5.6$  Hz), 1.78 – 1.70 (4 H, m), 1.31 – 1.25 (6 H, m).

### Step 3

A solution of ethyl 2-(1-tosylpiperidin-3-ylidene)acetate (1.97 g, 6.1 mmol) in ethanol (2 mL) and methylamine (33% w/w in EtOH, 1.5 mL, 12.2 mmol) were stirred at 80 °C in a sealed tube for 48 hours. After such time the solution was cooled to room temperature and the solvent removed *in vacuo*. The crude oil was purified by flash column chromatography (gradient elution: 1% MeOH in CH<sub>2</sub>Cl<sub>2</sub> to 5% MeOH in CH<sub>2</sub>Cl<sub>2</sub>) to provide the desired amine as colorless oil (1.52 g, 70%). <sup>1</sup>H NMR (400 MHz, CDCl<sub>3</sub>)  $\delta$ : 7.60 (2 H, d,  $J = 8.4$  Hz), 7.29 (2 H, d,  $J = 8.1$  Hz), 4.11 (2 H, q,  $J = 7.1$  Hz), 2.94 – 2.87 (4 H, m), 2.49 (2 H, s), 2.40 (3 H, s), 2.29 (3 H, s), 1.79 (1 H, br s, (N-H)), 1.72 – 1.62 (2 H, m), 1.52 – 1.41 (2 H, m), 1.24 (3 H, t,  $J = 7.1$  Hz).

### Step 4

To a solution of ethyl 2-(3-(methylamino)-1-tosylpiperidin-3-yl)acetate (1.52 g, 4.3 mmol) in anhydrous THF (30 mL) was added LiAlH<sub>4</sub> (0.65 g, 17.1 mmol) portionwise at 0 °C. The resulting solution was allowed to warm to room temperature over 6 hours and quenched successively with H<sub>2</sub>O (0.75 mL), 10% NaOH (1 mL) and H<sub>2</sub>O (2 mL). The resulting slurry was stirred with MgSO<sub>4</sub> and filtered. The filter cake was washed with Et<sub>2</sub>O (100 mL) and the combined organics removed *in vacuo* to afford the crude amino alcohol (1.23 g, 91%) as a viscous oil which solidified on standing and was used without further purification. <sup>1</sup>H NMR (400 MHz, CDCl<sub>3</sub>)  $\delta$ : 7.63 (2 H, d,  $J = 8.3$  Hz), 7.33 (2 H, d,  $J = 7.8$  Hz), 3.80 – 3.74 (2 H, m), 3.56 – 3.51 (2 H, m), 2.44 (3 H, s), 2.35 (3 H, s), 2.19 (1 H, d,  $J = 11.2$  Hz), 1.86 – 1.48 (6 H, m), 1.22 – 1.13 (1 H, m).

### Step 5

Triisopropylsilyl chloride (0.80 mL, 3.7 mmol) was added dropwise to a solution of amino alcohol (1.23 g, 3.9 mmol) and triethylamine (0.82 mL, 5.8 mmol) in anhydrous dichloromethane (15 mL) at 0 °C. The resulting solution was allowed to warm to room temperature over 16 hours and was quenched with H<sub>2</sub>O (20 mL). The organics were separated and washed with additional H<sub>2</sub>O (2 x 20 mL) and brine (20 mL), dried over Na<sub>2</sub>SO<sub>4</sub> and removed *in vacuo*. The crude oil was purified by flash column chromatography (gradient elution: 50% EtOAc in P.E. to 100% EtOAc) to provide the desired amine as a white crystalline solid (1.49 g, 82%). m.p. 76–77 °C. IR  $\nu_{\text{max}}$ /cm<sup>-1</sup> (film): 3370, 2938, 2865, 2790, 1598, 1465, 1389, 1353, 1336, 1307, 1257, 1162, 1145, 1091, 1064. <sup>1</sup>H NMR (400 MHz, CDCl<sub>3</sub>)  $\delta$ : 7.61 (2 H, d,  $J = 8.6$  Hz), 7.30 (2 H, d,  $J = 8.2$  Hz), 3.81 (2 H, t,  $J = 6.7$  Hz), 3.27 – 3.24 (1 H, m), 3.19 (1 H, d,  $J = 11.5$  Hz), 2.58 – 2.53 (1 H, m), 2.50 (1 H, d,  $J = 11.5$  Hz), 2.42 (3 H, s), 2.26 (3 H, s), 1.74 (1 H, br s), 1.71 – 1.55 (5 H, m), 1.32 – 1.25 (1 H, m), 1.06 – 1.02 (21 H, m). <sup>13</sup>C NMR

(101 MHz, CDCl<sub>3</sub>)  $\delta$ : 143.5, 133.3, 129.7, 127.8, 59.2, 53.8, 52.9, 46.8, 37.1, 32.2, 27.9, 21.6, 21.2, 18.2, 12.0. m/z HRMS found  $[M + H]^+$  469.2904, C<sub>24</sub>H<sub>45</sub>O<sub>3</sub>N<sub>2</sub>SSi requires 469.2915.

**(2-(methylamino)-1,2,3,4-tetrahydronaphthalen-2-yl)methyl pivalate (1z)**

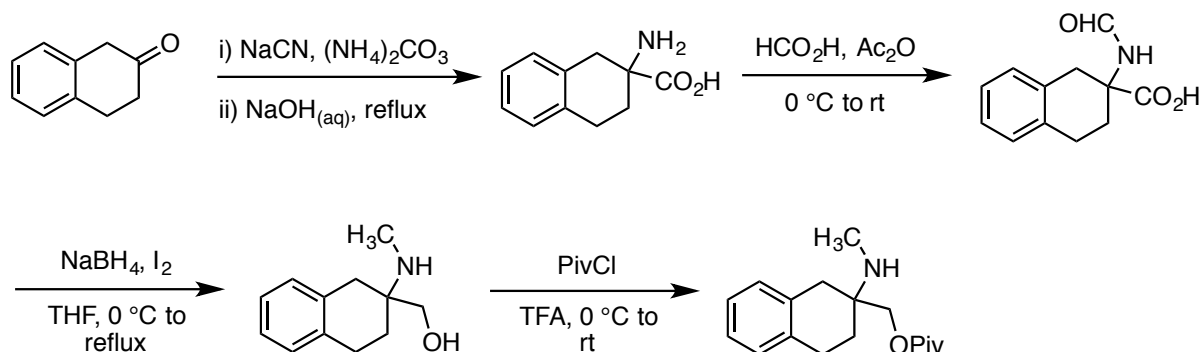

**Step 1**

$\beta$ -tetralone (3.5 g, 23.9 mmol), sodium cyanide (2.13 g, 26.3 mmol), and ammonium carbonate (5.3 g, 114.7 mmol) were suspended in ethanol/water (1:1, 80 mL) and heated at 60 °C for 16 hours. The solution was cooled to room temperature and the resulting precipitate was collected by vacuum filtration, washed with water (50 mL) and dried under vacuum to afford the desired product as a white solid (4.5 g, 87%) which was used directly in the next step without further purification. <sup>1</sup>H NMR (400 MHz, (CD<sub>3</sub>)<sub>2</sub>SO)  $\delta$ : 10.05 (1 H, br s), 8.24 (1 H, s), 7.32 – 6.74 (4 H, m), 3.11 (1 H, d,  $J$  = 17.0 Hz), 2.95 – 2.83 (2 H, m), 2.76 (1 H, d,  $J$  = 17.0 Hz), 1.97 – 1.89 (1 H, m), 1.87 – 1.76 (1 H, m).

**Step 2**

Crude hydantoin (4.5 g, 20.8 mmol) was suspended in aqueous sodium hydroxide (5 M, 25 mL) and heated at 120 °C for 24 hours. The solution was cooled to room temperature and the solid removed by filtration. The mother liquor was acidified to pH = 6 and the solvent removed *in vacuo*. The residue was suspended in ethanol (100 mL) and heated to reflux for 10 minutes. The solvent was rapidly filtered and the mother liquor cooled to room temperature and removed *in vacuo* to afford the crude amino acid as a pale pink solid (1.15 g, 25%). <sup>1</sup>H NMR (400 MHz, D<sub>2</sub>O)  $\delta$ : 7.30 – 7.18 (4 H, m), 3.23 (1 H, d,  $J$  = 16.7 Hz), 2.98 (1 H, d,  $J$  = 16.7 Hz), 2.89 – 2.76 (2 H, m), 2.42 – 2.31 (1 H, m), 2.05 – 1.99 (1 H, m).

**Step 3**

Acetic anhydride (4 mL) was added dropwise to a solution of crude amino acid (0.83 g, 5.2 mmol) in formic acid (> 95%, 10 mL) at room temperature. After the addition was complete the reaction mixture was stirred for an additional hour and quenched by the addition of ice water (10 mL). The solvent was removed *in vacuo* to give the crude *N*-formyl amino acid which was used directly in the

next step without further purification (0.76 g, 80%). <sup>1</sup>H NMR (400 MHz, (CD<sub>3</sub>)<sub>2</sub>SO) δ: 7.89 (1 H, s), 7.09 – 7.00 (4 H, m), 3.17 (1 H, d, *J* = 16.8 Hz), 3.04 (1 H, d, *J* = 16.8 Hz), 2.80 – 2.71 (2 H, m), 2.35 – 2.27 (1 H, m), 2.00 – 1.89 (1 H, m).

#### Step 4

To a vigorously stirred suspension of *N*-formyl amino acid (0.76 g, 3.5 mmol) and sodium borohydride (0.37 g, 9.7 mmol) in anhydrous THF (10 mL) was added a solution of iodine (1.06 g, 4.2 mmol) in anhydrous THF (5 mL) dropwise at 0 °C. Once gas evolution had ceased the mixture was heated at reflux for 18 hours and subsequently cooled to room temperature. Methanol was added cautiously until the solution became clear and the solvent was subsequently removed *in vacuo* to afford a white paste. The paste was dissolved in the minimum amount of 20% aqueous KOH (ca. 5 mL) and stirred at room temperature for 1 hour. The mixture was diluted with 20% aqueous KOH (10 mL) and extracted with CH<sub>2</sub>Cl<sub>2</sub> (3 x 20 mL). The organics were combined, dried over MgSO<sub>4</sub> and removed *in vacuo* to give the crude amino alcohol as a brown oil (0.40 g, 59%) which was used in the next step without further purification. <sup>1</sup>H NMR (400 MHz, CDCl<sub>3</sub>) δ: 7.14 – 7.16 (4 H, m), 3.52 – 3.33 (2 H, m), 2.86 – 2.67 (2 H, m), 2.33 (3 H, s), 1.91 – 1.82 (1 H, m), 1.79 – 1.69 (1 H, m), 1.62 – 1.52 (1 H, m), 1.44 – 1.33 (1 H, m).

#### Step 5

A 10 mL round-bottomed flask was charged with crude amino alcohol (0.40 g, 2.0 mmol) and cooled in an ice bath. Trifluoroacetic acid (1 mL) was added dropwise with vigorous stirring to afford a viscous solution. The reaction mixture was stirred at 0 °C for 5 minutes and trimethylacetyl chloride (0.37 mL, 3.0 mmol) was added dropwise. The flask was sealed with a glass-stopper and warmed to room temperature over 16 hours. The solvent was removed *in vacuo*, the residue was dissolved in diethyl ether (10 mL) and treated with triethylamine until pH = 9. Water (10 mL) was added and the layers were separated and the aqueous was extracted with diethyl ether (3 x 10 mL). The organics were combined, dried over MgSO<sub>4</sub> and removed *in vacuo*. The crude product was purified by flash column chromatography (30% EtOAc in P.E.) to afford the product as a white solid (0.26 g, 41%). m.p. 51–53 °C; IR  $\nu_{\text{max}}$ /cm<sup>-1</sup> (film): 3348, 2958, 2935, 2911, 1712, 1496, 1478, 1465, 1454, 1425, 1396, 1368, 1285, 1172, 1154, 1142, 1076, 1038. <sup>1</sup>H NMR (400 MHz, CDCl<sub>3</sub>) δ: 7.11 – 7.07 (4 H, m), 4.05 (2 H, dd, *J* = 11.1, 18.1 Hz), 2.95 – 2.71 (4 H, m), 2.37 (3 H, s), 1.91 – 1.75 (2 H, m), 1.24 (9 H, s), 1.16 (1 H, s). <sup>13</sup>C NMR (101 MHz, CDCl<sub>3</sub>) δ: 178.3, 135.6, 134.1, 129.6, 128.8, 126.0, 126.0, 66.4, 53.8, 39.1, 37.3, 28.7, 28.3, 27.3, 25.6. m/z HRMS found [M + H]<sup>+</sup> 276.1957, C<sub>17</sub>H<sub>26</sub>O<sub>2</sub>N requires 276.1958

**(1-(benzylamino)cyclohexyl)methyl pivalate (1aa)**

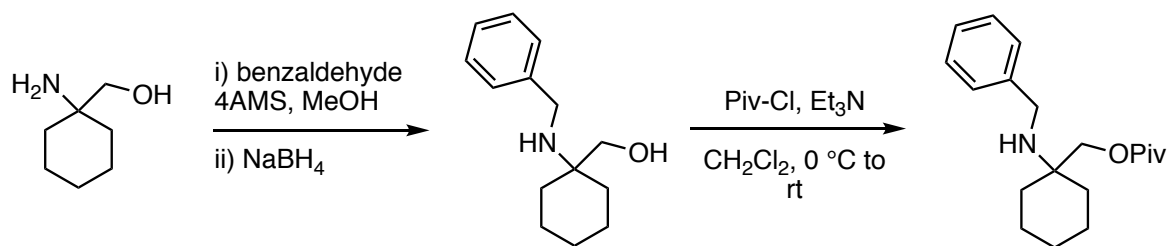

**Step 1**

To a solution of (1-aminocyclohexyl)methanol (1.00 g, 7.70 mmol) in MeOH (10 mL) was added powdered 4Å molecular sieves (~1 g) and benzaldehyde (1.17 mL, 11.6 mmol) and the mixture stirred at ambient temperature for 16 h. The mixture was cooled to 0 °C, sodium borohydride (0.43 g, 11.6 mmol) was added portion-wise and the mixture allowed to warm to ambient temperature and stirred for an additional 2 h. The reaction mixture was filtered and the MeOH removed *in vacuo*. 10% aqueous NaOH solution was added and the mixture was extracted with EtOAc (3 x 10 mL). The combined organic phases were dried (MgSO<sub>4</sub>) and concentrated *in vacuo* to afford the crude product as a colourless oil (1.46 g, 86%) which was used in the following step without further purification. <sup>1</sup>H NMR (400 MHz, CDCl<sub>3</sub>) δ: 7.39 – 7.29 (5 H, m), 3.64 (2 H, s), 3.39 (2 H, s), 1.69 – 1.59 (2 H, m), 1.58 – 1.34 (8 H, m).

**Step 2**

(1-(benzylamino)cyclohexyl)methanol (1.46 g, 6.66 mmol) was dissolved in CH<sub>2</sub>Cl<sub>2</sub> (15 mL) and cooled to 0 °C. Triethylamine (1.86 mL, 13.3 mmol) was added followed by drop-wise addition of trimethylacetyl chloride (0.984 mL, 7.99 mmol). The reaction mixture was allowed to warm slowly to ambient temperature and stirred for 16 h after which it was quenched with water (7 mL) and extracted with CH<sub>2</sub>Cl<sub>2</sub> (2 x 15 mL). The combined organic phases were washed with brine, dried (MgSO<sub>4</sub>) and concentrated *in vacuo*. The resulting residue was purified by flash column chromatography (5% EtOAc in P.E.) to afford the title compound as a colourless oil (1.40 g, 70%). IR ν<sub>max</sub>/cm<sup>-1</sup> (film): 2925, 2845, 1717, 1481, 1465, 1453, 1393, 1362, 1286, 1165, 1086, 1066, 1035; <sup>1</sup>H NMR (400 MHz, CDCl<sub>3</sub>) δ: 7.39 – 7.28 (4 H, m), 7.27 – 7.21 (1 H, m), 4.04 (2 H, s), 3.65 (2 H, s), 1.75 – 1.54 (5 H, m), 1.48 – 1.29 (5 H, m), 1.22 (9 H, s); <sup>13</sup>C NMR (101 MHz, CDCl<sub>3</sub>) δ: 178.5, 141.5, 128.5, 128.4, 127.0, 68.1, 54.2, 45.9, 39.1, 32.9, 27.4, 26.3, 21.4; m/z HRMS found [M + H]<sup>+</sup> 304.2269, C<sub>19</sub>H<sub>30</sub>NO<sub>2</sub> requires 304.2271.

**(1-((4-methylbenzyl)amino)cyclohexyl)methyl pivalate (1ab)**

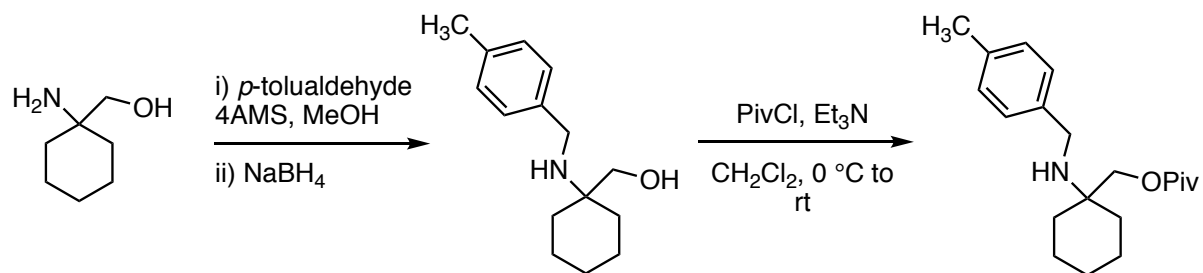

**Step 1**

To a solution of (1-aminocyclohexyl)methanol (1.0 g, 7.7 mmol) and powdered 4A molecular sieves (1 g) in anhydrous methanol (10 mL) was added *p*-tolualdehyde (1.36 mL, 11.6 mmol). The resulting mixture was stirred at room temperature for 16 hours and cooled to 0 °C. Sodium borohydride (0.44 g, 11.6 mmol) was cautiously added portionwise and warmed to room temperature over 2 hours. The crude reaction mixture was filtered over celite, washed with methanol and the solvent removed *in vacuo*. The resulting white paste was dissolved in 10% aqueous NaOH (30 mL) and stirred at room temperature for 2 hours. The aqueous was extracted with CH<sub>2</sub>Cl<sub>2</sub> (3 x 30 mL) and concentrated *in vacuo*. The resulting product was dissolved in 3M HCl (30 mL) and water (30 mL) and washed with diethyl ether (3 x 30 mL) and discarded. The resulting aqueous layer was cooled to 0 °C and basified carefully to pH = 10 with sodium hydroxide pellets. The solution was extracted with dichloromethane (3 x 30 mL), dried over Na<sub>2</sub>SO<sub>4</sub> and removed *in vacuo* to afford the crude amino alcohol as a white solid (1.43 g, 79%), which was used without further purification. <sup>1</sup>H NMR (400 MHz, CDCl<sub>3</sub>) δ: 7.23 (2 H, d, *J* = 7.8 Hz), 7.14 (2 H, d, *J* = 7.8 Hz), 3.59 (2 H, s), 3.37 (2 H, s), 2.34 (3 H, s), 1.65 – 1.37 (10 H, m).

**Step 2**

To a solution of crude amino alcohol (0.90 g, 3.9 mmol) in anhydrous dichloromethane (20 mL) was added triethylamine (1.19 mL, 8.6 mmol) and trimethylacetyl chloride (0.52 mL, 4.3 mmol) dropwise at 0 °C. The reaction mixture was warmed to room temperature over 16 hours and quenched by the addition of saturated aqueous NaHCO<sub>3</sub> (20 mL). The organic layer was separated and washed with additional saturated aqueous NaHCO<sub>3</sub> (2 x 20 mL), brine (20 mL) and dried over MgSO<sub>4</sub>. The solvent was removed *in vacuo* and the crude oil purified by flash column chromatography (gradient elution: 100% P.E. to 10% EtOAc in P.E.) to afford the product as a white solid (0.90 g, 73%). m.p. 42–44 °C. IR ν<sub>max</sub>/cm<sup>-1</sup> (film): 3321, 2923, 2848, 1712, 1514, 1481, 1463, 1441, 1398, 1360, 1286, 1185, 1166, 1088. <sup>1</sup>H NMR (400 MHz, CDCl<sub>3</sub>) δ: 7.24 (2 H, d, *J* = 7.7 Hz), 7.12 (2 H, d, *J* = 7.7 Hz), 4.03 (2 H, s), 3.60 (2 H, s), 2.33 (3 H, s), 1.73 – 1.56 (5 H, m), 1.47 – 1.30 (5 H, m), 1.22 (9 H, s). <sup>13</sup>C NMR (101 MHz, CDCl<sub>3</sub>) δ: 178.6, 138.5, 136.5, 129.2, 128.4, 68.1, 54.2, 45.6, 39.1, 32.9, 27.4, 26.3, 21.4,

21.2.  $m/z$  HRMS found  $[M + H]^+$  318.2429,  $C_{20}H_{32}NO_2$  requires 344.2428.

### Ethyl 1-aminocyclohexanecarboxylate hydrochloride

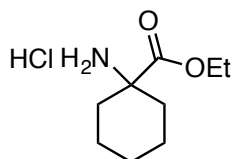

Thionyl chloride (30 mL) was added dropwise to a suspension of 1-aminocyclohexane-1-carboxylic acid hydrochloride (8.95 g, 50 mmol) in absolute ethanol (200 mL) at 0 °C. The resulting mixture was heated to reflux for 16 hours and subsequently cooled to room temperature. The solvent was removed *in vacuo* and residue dried under hi-vac (>1 mbar, 75 °C) to afford the product as a free-flowing white powder (10.2 g, 99%). m.p. 182 °C (sharp). IR  $\nu_{\max}/\text{cm}^{-1}$  (film): 2938, 2897, 2853, 1743, 1597, 1569, 1519, 1471, 1452, 1391, 1367, 1293, 1244, 1154, 1107, 1042, 1023.  $^1\text{H}$  NMR (400 MHz,  $\text{D}_2\text{O}$ )  $\delta$ : 4.32 (2 H, q,  $J = 7.1$  Hz), 2.17 – 2.10 (2 H, m), 1.85 – 1.73 (4 H, m), 1.60 – 1.50 (4 H, m), 1.32 (3 H, t,  $J = 7.1$  Hz).  $^{13}\text{C}$  NMR (101 MHz,  $\text{D}_2\text{O}$ )  $\delta$ : 172.2, 63.6, 59.9, 31.1, 23.5, 20.2, 13.1.  $m/z$  HRMS found  $[M + H]^+$  172.1328,  $\text{C}_9\text{H}_{18}\text{NO}_2$  requires 172.1332.

### (1-((4-chlorobenzyl)amino)cyclohexyl)methyl pivalate (1ac)

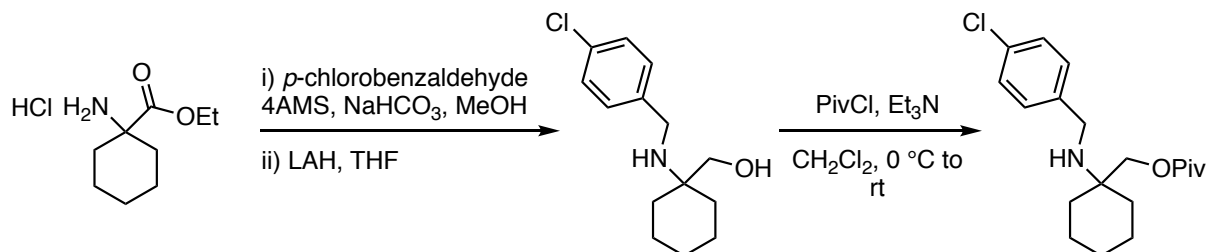

#### Step 1

To a solution of ethyl 1-aminocyclohexanecarboxylate hydrochloride (1.03 g, 5.0 mmol), sodium bicarbonate (0.42 g, 5.5 mmol) and powder 4A molecular sieves (1.0 g) in anhydrous methanol (10 mL) as added *p*-chlorobenzaldehyde (0.70 g, 5.0 mmol). The reaction was allowed to stir at room temperature for 16 hours and was subsequently filtered over celite and washed with methanol. The solvent was removed *in vacuo* and dried under vacuum. The resulting residue was dissolved in anhydrous THF (25 mL) and cooled to 0 °C before LAH (0.57 g, 15.0 mmol) was added portion-wise. The reaction mixture was warmed to room temperature over 2 hours, cooled to to 0 °C and quenched successively with  $\text{H}_2\text{O}$  (0.75 mL), 10% NaOH (1 mL) and  $\text{H}_2\text{O}$  (2 mL). The resulting slurry was stirred with  $\text{MgSO}_4$  and filtered. The filter cake was washed with  $\text{Et}_2\text{O}$  (100 mL) and the combined organics removed *in vacuo* to afford the crude amino alcohol as a white solid (1.23 g, 97%), which

was used without further purification.  $^1\text{H}$  NMR (400 MHz,  $\text{CDCl}_3$ )  $\delta$ : 7.33 – 7.26 (5 H, m), 3.60 (2 H, s), 3.38 (2 H, s), 1.61 – 1.40 (10 H, m).

## Step 2

To a solution of crude amino alcohol (1.01 g, 4.0 mmol) in anhydrous dichloromethane (20 mL) was added triethylamine (1.22 mL, 8.8 mmol) and trimethylacetyl chloride (0.53 mL, 4.4 mmol) dropwise at 0 °C. The reaction mixture was warmed to room temperature over 16 hours and quenched by the addition of saturated aqueous  $\text{NaHCO}_3$  (20 mL). The organic layer was separated and washed with additional saturated aqueous  $\text{NaHCO}_3$  (2 x 20 mL), brine (20 mL) and dried over  $\text{MgSO}_4$ . The solvent was removed *in vacuo* and the crude oil purified by flash column chromatography (gradient elution: 100% P.E. to 10% EtOAc in P.E.) to afford the product as a colourless oil (0.45 g, 33%). IR  $\nu_{\text{max}}/\text{cm}^{-1}$  (film): 2933, 2855, 1727, 1490, 1479, 1461, 1397, 1364, 1282, 1150, 1091, 1034, 1015.  $^1\text{H}$  NMR (400 MHz,  $\text{CDCl}_3$ )  $\delta$ : 7.28 – 7.26 (5 H, m), 4.02 (2 H, s), 3.61 (2 H, s), 1.70 – 1.57 (5 H, m), 1.46 – 1.31 (5 H, m), 1.21 (9 H, s).  $^{13}\text{C}$  NMR (101 MHz,  $\text{CDCl}_3$ )  $\delta$ : 178.5, 140.1, 132.6, 129.7, 128.6, 68.1, 54.3, 45.2, 39.1, 32.8, 27.4, 26.2, 21.4.  $m/z$  HRMS found  $[\text{M} + \text{H}]^+$  338.1884,  $\text{C}_{19}\text{H}_{29}\text{ClNO}_2$  requires 338.1881.

## (1-((3-nitrobenzyl)amino)cyclohexyl)methyl pivalate (1ad)

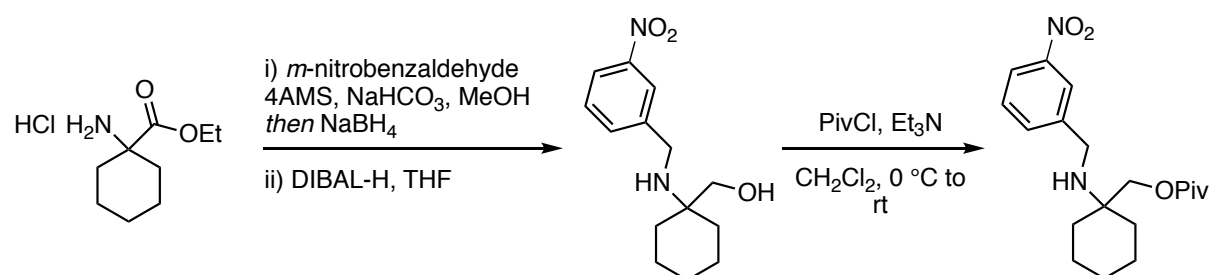

## Step 1

To a solution of ethyl 1-aminocyclohexanecarboxylate hydrochloride (1.03 g, 5.0 mmol), sodium bicarbonate (0.42 g, 5.5 mmol) and powder 4A molecular sieves (1.0 g) in anhydrous methanol (10 mL) as added *m*-nitrobenzaldehyde (0.76 g, 5.0 mmol). The reaction was allowed to stir at room temperature for 16 hours and was subsequently cooled to 0 °C. Sodium borohydride (0.28 g, 7.5 mmol) was cautiously added portion-wise and the mixture was allowed to warm to room temperature over 2 hours. The reaction mixture was filtered over celite, washed with methanol and the solvent removed *in vacuo* to afford the amino ester as a yellow oil (1.45 g, 95%), which was used without further purification.  $^1\text{H}$  NMR (400 MHz,  $\text{CDCl}_3$ )  $\delta$ : 8.23 (1 H, app s), 8.09 (1 H, dd,  $J = 1.6, 8.2$  Hz), 7.68 (1 H, d,  $J = 7.5$  Hz), 7.47 (1 H, t,  $J = 8.0$  Hz), 4.20 (2 H, q,  $J = 7.1$  Hz), 3.70 (2 H, s), 1.95 – 1.89 (2 H, m), 1.75 – 1.37 (8 H, m), 1.30 (3 H, t,  $J = 7.1$  Hz).

## Step 2

To a solution of the crude amino ester (1.38 g, 4.5 mmol) in anhydrous THF (20 mL) at 0 °C was added DIBAL-H (1 M in THF, 13.5 mL, 13.5 mmol) dropwise. The resulting solution was allowed to warm to room temperature over 16 hours. The solution was cooled to 0 °C and quenched with Rochelle's salt (20 mL). The mixture was allowed to stir at room temperature for 3 hours and the organic layer was separated. The aqueous was extracted with ethyl acetate (3 x 20 mL) and the combined organic layers washed with brine, dried over Na<sub>2</sub>SO<sub>4</sub> and concentrated *in vacuo*. The resulting solid was purified by flash column chromatography (gradient elution: 5% EtOAc in P.E. to 50% EtOAc in P.E.) to afford the amino alcohol as a pale yellow solid (0.58 g, 49%). <sup>1</sup>H NMR (400 MHz, CDCl<sub>3</sub>) δ: 8.22 (1 H, app s), 8.11 (1 H, dd, *J* = 1.3, 8.2 Hz), 7.70 (1 H, d, *J* = 7.6 Hz), 7.50 (1 H, t, *J* = 7.9 Hz), 3.76 (2 H, s), 3.42 (2 H, s), 1.97 (1 H, br s), 1.63 – 1.41 (10 H, m).

## Step 3

To a solution of crude amino alcohol (0.58 g, 2.2 mmol) in anhydrous dichloromethane (10 mL) was added triethylamine (0.67 mL, 4.8 mmol) and trimethylacetyl chloride (0.30 mL, 2.4 mmol) dropwise at 0 °C. The reaction mixture was warmed to room temperature over 16 hours and quenched by the addition of saturated aqueous NaHCO<sub>3</sub> (10 mL). The organic layer was separated and washed with additional saturated aqueous NaHCO<sub>3</sub> (2 x 10 mL), brine (10 mL) and dried over MgSO<sub>4</sub>. The solvent was removed *in vacuo* and the crude oil purified by flash column chromatography (gradient elution: 100% P.E. to 25% EtOAc in P.E.) to afford the product as a colourless oil (0.47 g, 61%). IR  $\nu_{\text{max}}/\text{cm}^{-1}$  (film): 2932, 2856, 1725, 1527, 1479, 1461, 1397, 1348, 1282, 1151, 1094, 1034. <sup>1</sup>H NMR (400 MHz, CDCl<sub>3</sub>) δ: 8.25 (1 H, app s), 8.09 (1 H, dd, *J* = 1.0, 8.0 Hz), 7.70 (1 H, d, *J* = 7.8 Hz), 7.45 (1 H, t, *J* = 7.8 Hz), 4.04 (2 H, s), 3.77 (2 H, s), 1.67 – 1.56 (5 H, m), 1.50 – 1.38 (5 H, m), 1.22 (9 H, s). <sup>13</sup>C NMR (101 MHz, CDCl<sub>3</sub>) δ: 178.5, 148.5, 143.5, 134.5, 129.3, 123.2, 122.1, 68.0, 54.5, 45.2, 39.2, 32.8, 27.4, 26.2, 21.4. *m/z* HRMS found [M + H]<sup>+</sup> 349.2122, C<sub>19</sub>H<sub>29</sub>N<sub>2</sub>O<sub>4</sub> requires 349.2122

## General procedure A for the synthesis of $\beta$ -Lactams

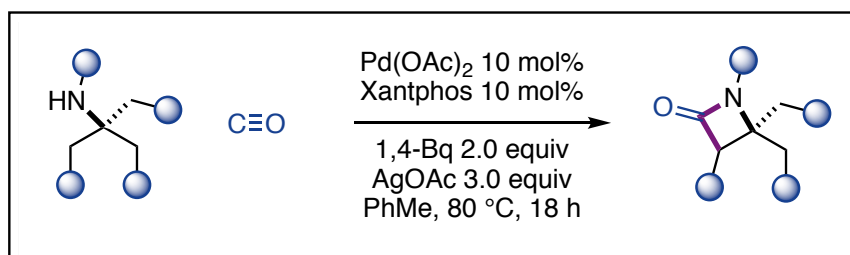

To a 10 mL oven-dried round-bottomed flask with large oval stirrer bar was added palladium (II) acetate (6.7 mg, 0.03 mmol, 0.1 equiv), silver(I) acetate (150 mg, 0.9 mmol, 3 equiv), Xantphos (17 mg, 0.03 mmol, 0.1 equiv) and 1,4-benzoquinone (66 mg, 0.6 mmol, 2 equiv). Anhydrous toluene (3 mL) and amine (0.3 mmol) were then added successively and the flask sealed with a new septum and Teflon tape. A balloon of carbon monoxide was placed on top and the flask purged (3 cycles). The flask was then placed into a preheated oil bath at 80 °C so as the solvent and oil level matched and left to stir at 500 rpm for 18 hours. After such time, the reaction mixture was allowed to cool to room temperature and the contents diluted with EtOAc (2 mL). The mixture was filtered over celite and washed with additional EtOAc (5 mL). The organics were removed under vacuum and the crude reaction mixture purified by flash column chromatography to afford the corresponding  $\beta$ -lactam.

### *cis*-(7-ethyl-8-oxo-7-azabicyclo[4.2.0]octan-6-yl)methyl pivalate (**2a**)

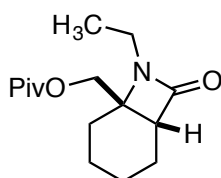

General procedure A was applied to (1-(ethylamino)cyclohexyl)methyl pivalate (72.4 mg, 0.3 mmol) for 18 hours. The crude product was purified by flash column chromatography (gradient elution: 5% EtOAc in P.E. to 30% EtOAc in P.E.) and filtered through a pad of activated charcoal (10% EtOAc in P.E.) to afford the product as a colourless oil (58.2 mg, 72%). IR ( $\nu_{\text{max}}/\text{cm}^{-1}$ ): 2937, 2872, 1727, 1481, 1459, 1399, 1376, 1282, 1228, 1148, 1035.  $^1\text{H}$  NMR (400 MHz,  $\text{CDCl}_3$ )  $\delta$ : 4.25 (1 H, d,  $J = 11.8$  Hz), 4.01 (1 H, d,  $J = 12.0$  Hz), 3.19 (1 H, sxt,  $J = 7.1$  Hz), 3.10 (1 H, sxt,  $J = 7.1$  Hz), 2.97 (1 H, dd,  $J = 3.1, 5.6$  Hz), 1.90 – 1.85 (1 H, m), 1.81 – 1.77 (1 H, m), 1.66 – 1.49 (6 H, m), 1.20 – 1.17 (12 H, m).  $^{13}\text{C}$  NMR (101 MHz,  $\text{CDCl}_3$ )  $\delta$ : 178.2, 169.8, 66.6, 59.1, 49.7, 39.1, 34.5, 27.3, 25.3, 19.4, 18.7, 17.2, 14.3.  $m/z$  HRMS found  $[\text{M} + \text{H}]^+$  268.1908,  $\text{C}_{15}\text{H}_{26}\text{NO}_3$  requires 268.1907.

***cis*-7-ethyl-6-(((triisopropylsilyl)oxy)methyl)-7-azabicyclo[4.2.0]octan-8-one (2b)**

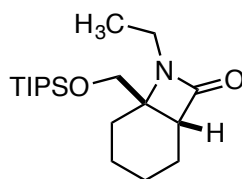

General procedure A was applied to *N*-ethyl-1-(((triisopropylsilyl)oxy)methyl)cyclohexan-1-amine (101.8 mg, 0.3 mmol) for 18 hours. The crude product was purified by flash column chromatography over silica (20% EtOAc in P.E.) and subsequently by flash column chromatography over alumina (gradient elution: 5% EtOAc in P.E. to 10% EtOAc in P.E.) to afford the product as a colourless oil (53.0 mg, 54%). IR ( $\nu_{\text{max}}/\text{cm}^{-1}$ ): 2941, 2866, 1743, 1462, 1401, 1375, 1199, 1116, 1066.  $^1\text{H}$  NMR (400 MHz,  $\text{CDCl}_3$ )  $\delta$ : 3.73 (2 H, dd,  $J = 10.4, 16.9$  Hz), 3.23 – 3.11 (2 H, m), 2.90 (1 H, dd,  $J = 3.2, 6.1$  Hz), 1.89 – 1.77 (2 H, m), 1.66 – 1.45 (6 H, m), 1.19 (3 H, t,  $J = 7.4$  Hz), 1.08 – 1.04 (21 H, m).  $^{13}\text{C}$  NMR (101 MHz,  $\text{CDCl}_3$ )  $\delta$ : 170.5, 68.2, 61.0, 49.3, 34.6, 25.3, 19.8, 19.1, 18.1, 17.7, 14.5, 12.0.  $m/z$  HRMS found  $[\text{M} + \text{H}]^+$  340.2666,  $\text{C}_{19}\text{H}_{38}\text{O}_2\text{NSi}$  requires 340.2666.

***cis*-6-butyl-7-ethyl-7-azabicyclo[4.2.0]octan-8-one (2c)**

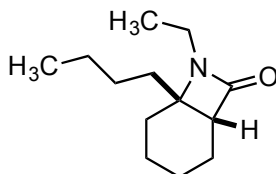

Prepared according to general procedure A using 1-butyl-*N*-ethylcyclohexan-1-amine (55.0 mg, 0.3 mmol),  $\text{Pd}(\text{OAc})_2$  (6.7 mg, 0.03 mmol), Xantphos (17 mg, 0.03 mmol), 1,4-benzoquinone (65 mg, 0.6 mmol) and silver(I) acetate (150 mg, 0.9 mmol) in toluene (3 mL) at 80 °C for 18 hours. The crude product was purified by flash column chromatography (20% EtOAc in P.E.) and subsequently by flash column chromatography over alumina (20% EtOAc in P.E.) to afford the product as a colourless oil (37.0 mg, 59%). IR  $\nu_{\text{max}}/\text{cm}^{-1}$  (film): 2929, 2861, 1734, 1455, 1399, 1376, 1334, 1302, 1191, 1142, 1086, 1056, 1035;  $^1\text{H}$  NMR (400 MHz,  $\text{CDCl}_3$ )  $\delta$ : 3.12 (2 H, d sept,  $J = 25.4, 7.2$  Hz), 2.85 (1 H, dd,  $J = 2.9, 5.3$  Hz), 1.94 – 1.80 (1 H, m), 1.75 – 1.63 (3 H, m), 1.63 – 1.45 (6 H, m), 1.39 – 1.23 (4 H, m), 1.19 (3 H, t,  $J = 7.3$  Hz), 0.91 (3 H, t,  $J = 7.0$  Hz);  $^{13}\text{C}$  NMR (101 MHz,  $\text{CDCl}_3$ )  $\delta$ : 170.5, 60.6, 51.5, 38.3, 34.1, 28.1, 26.7, 23.3, 19.8, 18.5, 17.7, 14.4, 14.2;  $m/z$  HRMS found  $[\text{M} + \text{H}]^+$  209.1786,  $\text{C}_{13}\text{H}_{23}\text{NO}$  requires 209.1780.

**(1,2-diethyl-3-methyl-4-oxoazetidin-2-yl)methyl pivalate (2d)**

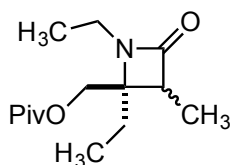

Prepared according to general procedure A using 2-ethyl-2-(ethylamino)butyl pivalate (64.0 mg, 0.3 mmol), Pd(OAc)<sub>2</sub> (6.7 mg, 0.03 mmol), Xantphos (17 mg, 0.03 mmol), 1,4-benzoquinone (65 mg, 0.6 mmol) and silver(I) acetate (150 mg, 0.9 mmol) in toluene (3 mL) at 80 °C for 18 hours. The crude product was purified by flash column chromatography (gradient elution: 10% EtOAc in P.E. to 30% EtOAc in P.E.) to afford the product as a colourless oil (39.0 mg, 51%, inseparable 1:1 mixture of diastereomers). IR  $\nu_{\text{max}}/\text{cm}^{-1}$  (film): 2972, 2935, 1728, 1480, 1461, 1399, 1368, 1280, 1148, 1092, 1035; <sup>1</sup>H NMR (400 MHz, CDCl<sub>3</sub>)  $\delta$ : 4.37 (1 H, d,  $J$  = 12.0 Hz), 4.35 (1 H, d,  $J$  = 12.0 Hz), 4.07 (2 H, d,  $J$  = 12.0 Hz), 3.21–3.11 (2 H, m), 3.16 (2 H, quintet,  $J$  = 7.4 Hz), 3.00 (1 H, q,  $J$  = 7.7 Hz), 2.98 (1 H, q,  $J$  = 7.6 Hz), 1.93 (1 H, dq,  $J$  = 7.4, 14.8 Hz), 1.88 (1 H, dq,  $J$  = 7.6, 15.2 Hz), 1.70 (1 H, dq,  $J$  = 7.6, 15.1 Hz), 1.59 (1 H, dq,  $J$  = 7.6, 15.0 Hz), 1.25–1.15 (12 H, m), 1.22 (9 H, s), 1.21 (9 H, s), 0.94 (6 H, q,  $J$  = 7.5 Hz); <sup>13</sup>C NMR (101 MHz, CDCl<sub>3</sub>)  $\delta$ : 178.1, 178.1, 170.1, 170.1, 65.5, 65.2, 63.2, 63.0, 50.8, 49.6, 39.1, 39.0, 35.0, 34.9, 27.3, 27.3, 27.1, 23.8, 14.7 (2C), 9.2, 9.1, 9.0, 8.5;  $m/z$  HRMS found  $[M + H]^+$  256.1909, C<sub>14</sub>H<sub>26</sub>NO<sub>3</sub> requires 256.1907.

***cis*-7-isopropyl-6-(((triisopropylsilyl)oxy)methyl)-7-azabicyclo[4.2.0]octan-8-one (2e)**

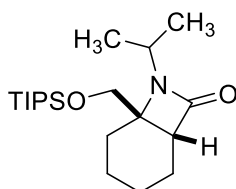

Prepared according to general procedure A using *N*-isopropyl-1-(((triisopropylsilyl)oxy)methyl)cyclohexan-1-amine (98.0 mg, 0.3 mmol), Pd(OAc)<sub>2</sub> (9.3 mg, 0.03 mmol), Xantphos (17 mg, 0.03 mmol), 1,4-benzoquinone (65 mg, 0.6 mmol) and silver(I) acetate (150 mg, 0.9 mmol) in toluene (3 mL) at 80 °C for 18 hours. The crude product was purified by flash column chromatography (20% EtOAc in P.E.) to afford an inseparable mixture of *cis*-7-isopropyl-6-(((triisopropylsilyl)oxy)methyl)-7-azabicyclo[4.2.0]octan-8-one and 4-methyl-1-(((triisopropylsilyl)oxy)methyl)cyclohexylazetidin-2-one as a colorless oil (21.0 mg, 20%, 1.5:1 ratio). The mixture was separated by preparative HPLC to obtain a clean sample of the title compound for analysis. IR  $\nu_{\text{max}}/\text{cm}^{-1}$  (neat): 2943, 2867, 1743, 1464, 1382, 1119, 1067, 1014; <sup>1</sup>H NMR (400 MHz, CDCl<sub>3</sub>)  $\delta$  3.74 (2H, d,  $J$  = 2.1 Hz), 3.55 (1H, spt,  $J$  = 6.8 Hz), 2.86 (1H, dd,  $J$  = 3.3, 6.3 Hz), 1.89–1.78 (2H, m), 1.72–1.63 (3H, m), 1.60–1.43 (3H, m), 1.33 (6H, dd,  $J$  = 2.7, 6.8 Hz),

1.17 – 0.98 (21H, m);  $^{13}\text{C}$  NMR (101 MHz,  $\text{CDCl}_3$ )  $\delta$  169.9, 68.6, 61.6, 49.2, 44.7, 25.9, 21.8, 21.6, 19.9, 19.2, 18.2, 18.0, 12.1;  $m/z$  HRMS found  $[\text{M} + \text{H}]^+$  354.2827,  $\text{C}_{20}\text{H}_{40}\text{NO}_2\text{Si}$  requires 354.2823.

#### 4-methyl-1-(1-(((triisopropylsilyl)oxy)methyl)cyclohexyl)azetidin-2-one

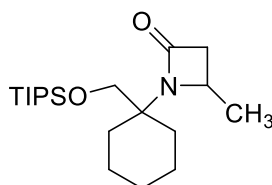

Prepared according to general procedure A using *N*-isopropyl-1-(((triisopropylsilyl)oxy)methyl)cyclohexan-1-amine (98.0 mg, 0.3 mmol),  $\text{Pd}(\text{OAc})_2$  (9.3 mg, 0.03 mmol), Xantphos (17 mg, 0.03 mmol), 1,4-benzoquinone (65 mg, 0.6 mmol) and silver(I) acetate (150 mg, 0.9 mmol) in toluene (3 mL) at 80 °C for 18 hours. The crude product was purified by flash column chromatography (20% EtOAc in P.E.) to afford an inseparable mixture of 4-methyl-1-(1-(((triisopropylsilyl)oxy)methyl)cyclohexyl)azetidin-2-one and *cis*-7-isopropyl-6-(((triisopropylsilyl)oxy)methyl)-7-azabicyclo[4.2.0]octan-8-one as a colorless oil (21.0 mg, 20%, 1:1.5 ratio). The mixture was separated by preparative HPLC to obtain a clean sample of the title compound for analysis.

IR  $\nu_{\text{max}}/\text{cm}^{-1}$  (neat): 2940, 2865, 1744, 1463, 1379, 1364, 1348, 1134, 1098, 1068;  $^1\text{H}$  NMR (400 MHz,  $\text{CDCl}_3$ )  $\delta$  3.85 (1H, qt d,  $J = 2.1, 5.7$  Hz), 3.70 (2H, dd,  $J = 9.6, 22.6$  Hz), 2.97 (1H, dd,  $J = 5.3, 14.3$  Hz), 2.33 (1 H, dd,  $J = 2.3, 14.3$  Hz), 2.24 – 2.12 (1H, m), 1.94 (1H, app. d,  $J = 13.5$  Hz), 1.68 – 1.43 (6H, m), 1.38 (3 H, d,  $J = 6.1$  Hz), 1.35 – 1.24 (2H, m), 1.23 – 0.92 (21H, m);  $^{13}\text{C}$  NMR (101 MHz,  $\text{CDCl}_3$ )  $\delta$  167.8, 68.4, 61.4, 47.2, 43.1, 30.7, 25.7, 22.6, 22.3, 22.2, 18.2, 12.1;  $m/z$  HRMS found  $[\text{M} + \text{H}]^+$  354.2828,  $\text{C}_{20}\text{H}_{40}\text{NO}_2\text{Si}$  requires 354.2823.

#### *cis*-7-heptyl-8-oxo-7-azabicyclo[4.2.0]octan-6-yl)methyl pivalate (2f)

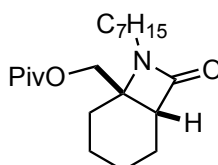

Prepared according to general procedure A using (1-(heptylamino)cyclohexyl)methyl pivalate (93.0 mg, 0.3 mmol),  $\text{Pd}(\text{OAc})_2$  (6.7 mg, 0.03 mmol), Xantphos (17 mg, 0.03 mmol), 1,4-benzoquinone (65 mg, 0.6 mmol) and silver(I) acetate (150 mg, 0.9 mmol) in toluene (3 mL) at 80 °C for 18 hours. The

crude product was purified by flash column chromatography (gradient elution: 5% EtOAc in P.E. to 15% EtOAc in P.E.) to afford the product as a brown oil (71 mg, 70%). IR  $\nu_{\text{max}}/\text{cm}^{-1}$  (film): 2933, 2861, 1730, 1481, 1461, 1393, 1368, 1276, 1148, 1037;  $^1\text{H}$  NMR (400 MHz,  $\text{CDCl}_3$ )  $\delta$ : 4.24 (1 H, d,  $J = 11.9$  Hz), 4.02 (1 H, d,  $J = 11.9$  Hz), 3.15 – 3.06 (1 H, m), 3.04 – 2.95 (2 H, m), 1.94 – 1.84 (1 H, m), 1.79 (1 H, dt,  $J = 3.6, 8.3$  Hz), 1.72 – 1.43 (8 H, m), 1.33 – 1.24 (8 H, m), 1.21 (9 H, s), 0.87 (3 H, t,  $J = 6.9$  Hz);  $^{13}\text{C}$  NMR (101 MHz,  $\text{CDCl}_3$ )  $\delta$ : 178.2, 170.1, 66.8, 59.0, 49.6, 40.2, 39.1, 31.9, 29.3, 29.1, 27.4, 27.3, 25.3, 22.7, 19.6, 18.8, 17.3, 14.2;  $m/z$  HRMS found  $[\text{M} + \text{H}]^+$  338.2691,  $\text{C}_{20}\text{H}_{36}\text{NO}_3$  requires 338.2690.

**(2-ethyl-3-methyl-4-oxo-1-propylazetidin-2-yl)methyl pivalate (2g)**

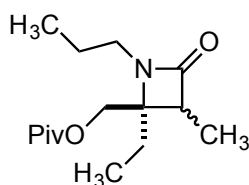

Prepared according to general procedure A using 2-ethyl-2-(propylamino)butyl pivalate (73.0 mg, 0.3 mmol),  $\text{Pd}(\text{OAc})_2$  (6.7 mg, 0.03 mmol), Xantphos (17 mg, 0.03 mmol), 1,4-benzoquinone (65 mg, 0.6 mmol) and silver(I) acetate (150 mg, 0.9 mmol) in toluene (3 mL) at 80 °C for 18 hours. The crude product was purified by flash column chromatography (20% EtOAc in P.E.) and subsequently by flash column chromatography over alumina (20% EtOAc in P.E.) to afford the product as a colourless oil (53.0 mg, 66%, inseparable 1:1 mixture of diastereomers). IR  $\nu_{\text{max}}/\text{cm}^{-1}$  (film): 2972, 2873, 1730, 1483, 1459, 1399, 1365, 1278, 1148, 1094, 1033;  $^1\text{H}$  NMR (400 MHz,  $\text{CDCl}_3$ )  $\delta$ : 4.36 (1 H, d,  $J = 11.9$  Hz), 4.34 (1 H, d,  $J = 12.0$  Hz), 4.06 (2 H, d,  $J = 12.0$  Hz), 3.10 – 2.90 (6 H, m), 1.99 – 1.82 (2 H, m), 1.75 – 1.63 (2 H, m), 1.64 – 1.50 (4 H, m), 1.26 – 1.16 (6 H, m), 1.21 (9 H, s), 1.20 (9 H, s), 0.96 – 0.90 (6 H, m), 0.89 (3 H, t,  $J = 7.5$  Hz), 0.89 (3 H, t,  $J = 7.4$  Hz);  $^{13}\text{C}$  NMR (101 MHz,  $\text{CDCl}_3$ )  $\delta$ : 178.1, 178.0, 170.4, 170.4, 65.5, 65.2, 63.1, 62.8, 50.7, 49.5, 42.2, 42.1, 39.1, 39.0, 27.3 (2C), 27.1, 23.7, 22.8, 22.7, 11.8, 11.8, 9.2, 9.1, 9.1, 8.5;  $m/z$  HRMS found  $[\text{M} + \text{H}]^+$  270.2065,  $\text{C}_{15}\text{H}_{28}\text{NO}_3$  requires 270.2064.

**(*cis*-7-(3-ethoxy-3-oxopropyl)-8-oxo-7-azabicyclo[4.2.0]octan-6-yl)methyl pivalate (2h)**

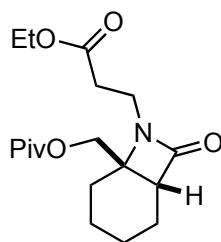

Prepared according to general procedure A using (1-((3-ethoxy-3-oxopropyl)amino)cyclohexyl)methyl pivalate (94.0 mg, 0.3 mmol), Pd(OAc)<sub>2</sub> (6.7 mg, 0.03 mmol), Xantphos (17 mg, 0.03 mmol), 1,4-benzoquinone (65 mg, 0.6 mmol) and silver(I) acetate (150 mg, 0.9 mmol) in toluene (3 mL) at 80 °C for 18 hours. The crude product was purified by flash column chromatography (gradient elution: 20% EtOAc in P.E. to 30% EtOAc in P.E.) and subsequently by filtration through activated charcoal, eluting with EtOAc, to afford the product as a yellow oil (84 mg, 82%). IR  $\nu_{\text{max}}/\text{cm}^{-1}$  (film): 2937, 2873, 1726, 1479, 1459, 1399, 1367, 1282, 1146, 1031; <sup>1</sup>H NMR (400 MHz, CDCl<sub>3</sub>)  $\delta$ : 4.23 (1 H, d,  $J$  = 11.9 Hz), 4.14 (2 H, q,  $J$  = 7.1 Hz), 4.04 (1 H, d,  $J$  = 11.9 Hz), 3.38 (2 H, dtd,  $J$  = 7.5, 14.4, 21.8 Hz), 2.97 (1 H, dd,  $J$  = 3.7, 5.9 Hz), 2.76 – 2.54 (2 H, m), 1.93 – 1.76 (2 H, m), 1.69 – 1.47 (6 H, m), 1.25 (3 H, t,  $J$  = 7.1 Hz), 1.21 (9 H, s); <sup>13</sup>C NMR (101 MHz, CDCl<sub>3</sub>)  $\delta$ : 178.1, 171.4, 170.4, 66.5, 61.0, 59.4, 49.7, 39.1, 35.7, 33.7, 27.3, 25.0, 19.5, 18.7, 17.3, 14.3;  $m/z$  HRMS found  $[M + H]^+$  340.2120, C<sub>18</sub>H<sub>30</sub>NO<sub>5</sub> requires 340.2118.

**(*cis*-8-oxo-7-(2-(phenylsulfonyl)ethyl)-7-azabicyclo[4.2.0]octan-6-yl)methyl pivalate (2i)**

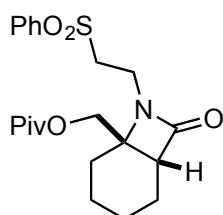

Prepared according to general procedure A using (1-((2-(phenylsulfonyl)ethyl)amino)cyclohexyl)methyl pivalate (1.15 g, 3 mmol), Pd(OAc)<sub>2</sub> (67.0 mg, 0.3 mmol), Xantphos (170.0 mg, 0.3 mmol), 1,4-benzoquinone (655.0 mg, 6.0 mmol) and silver(I) acetate (1.50 g, 9.0 mmol) in toluene (30 mL) at 80 °C for 18 hours. The crude product was purified by flash column chromatography (50% EtOAc in P.E.) to afford the product as a white amorphous solid (833 mg, 68%). m.p. 61–63 °C; IR  $\nu_{\text{max}}/\text{cm}^{-1}$  (film): 2940, 2865, 1752, 1724, 1477, 1449, 1403, 1368, 1306, 1280, 1151, 1140, 1082, 1050, 1031; <sup>1</sup>H NMR (500 MHz, CDCl<sub>3</sub>)  $\delta$ : 7.92 (2 H, app d,  $J$  = 7.2 Hz), 7.69 (1 H, tt,  $J$  = 7.5, 1.1 Hz), 7.59 (2 H, app t,  $J$  = 7.7 Hz), 4.27 (1 H, d,  $J$  = 12.0 Hz), 3.97 (1 H, d,  $J$  = 12.0 Hz), 3.60 – 3.35 (4 H, m), 2.92 (1 H, dd,  $J$  = 6.5, 3.8 Hz), 1.88 – 1.77 (2 H, m), 1.68 – 1.39 (6

H, m), 1.20 (9 H, s);  $^{13}\text{C}$  NMR (126 MHz,  $\text{CDCl}_3$ )  $\delta$ : 178.0, 170.3, 138.9, 134.3, 129.7, 128.2, 66.7, 59.7, 54.1, 50.0, 39.1, 34.0, 27.3, 24.9, 19.4, 18.8, 17.3;  $m/z$  HRMS found  $[\text{M} + \text{H}]^+$  408.1836,  $\text{C}_{21}\text{H}_{30}\text{NO}_5\text{S}$  requires 408.1839.

**(*cis*-8-oxo-7-(3-(pyridin-2-yl)propyl)-7-azabicyclo[4.2.0]octan-6-yl)methyl pivalate (2j)**

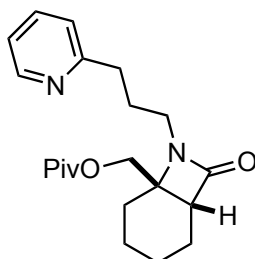

Prepared according to general procedure A using (1-((3-(pyridin-2-yl)propyl)amino)cyclohexyl)methyl pivalate (100.0 mg, 0.3 mmol),  $\text{Pd}(\text{OAc})_2$  (6.7 mg, 0.03 mmol), Xantphos (17 mg, 0.03 mmol), 1,4-benzoquinone (65 mg, 0.6 mmol) and silver(I) acetate (150 mg, 0.9 mmol) in toluene (3 mL) at 80 °C for 18 hours. The crude product was purified by flash column chromatography (gradient elution: 60% EtOAc in P.E. to 70% EtOAc in P.E.) to afford the product as a dark brown oil (83 mg, 77%). IR  $\nu_{\text{max}}/\text{cm}^{-1}$  (film): 2944, 2877, 1724, 1594, 1568, 1475, 1435, 1399, 1368, 1278, 1144, 1035;  $^1\text{H}$  NMR (400 MHz,  $\text{CDCl}_3$ )  $\delta$ : 8.51 (1 H, d,  $J = 4.1$  Hz), 7.60 (1 H, td,  $J = 7.7, 1.8$  Hz), 7.20 (1 H, d,  $J = 7.8$  Hz), 7.12 (1 H, dd,  $J = 7.4, 5.0$  Hz), 4.23 (1 H, d,  $J = 11.9$  Hz), 4.04 (1 H, d,  $J = 11.9$  Hz), 3.07 (2 H, d sept,  $J = 14.2, 7.6$  Hz), 2.98 (1 H, dd,  $J = 5.9, 3.6$  Hz), 2.83 (2H, t,  $J = 7.6$  Hz), 2.04 (2 H, qt,  $J = 7.6$  Hz), 1.95 – 1.84 (1 H, m), 1.84 – 1.74 (1 H, m), 1.74 – 1.44 (6 H, m), 1.18 (9 H, s);  $^{13}\text{C}$  NMR (101 MHz,  $\text{CDCl}_3$ )  $\delta$ : 178.2, 170.3, 160.8, 149.3, 136.8, 123.2, 121.4, 66.8, 59.1, 49.7, 39.7, 39.1, 35.8, 29.0, 27.3, 25.3, 19.6, 18.8, 17.4;  $m/z$  HRMS found  $[\text{M} + \text{H}]^+$  359.2329,  $\text{C}_{21}\text{H}_{31}\text{N}_2\text{O}_3$  requires 359.2329.

***cis*-7-cyclohexyl-6-(((triisopropylsilyl)oxy)methyl)-7-azabicyclo[4.2.0]octan-8-one (2k)**

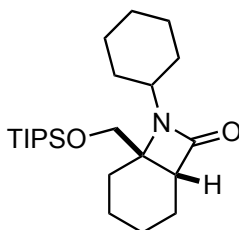

Prepared according to general procedure A using *N*-cyclohexyl-1-(((triisopropylsilyl)oxy)methyl)cyclohexan-1-amine (110 mg, 0.3 mmol),  $\text{Pd}(\text{OAc})_2$  (6.7 mg, 0.03

mmol), Xantphos (17 mg, 0.03 mmol), 1,4-benzoquinone (65 mg, 0.6 mmol) and silver(I) acetate (150 mg, 0.9 mmol) in toluene (3 mL) at 80 °C for 18 hours. The crude mixture was purified by flash column chromatography (10% EtOAc in P.E.) and subsequently by flash column chromatography over alumina (10% EtOAc in P.E.) to afford the title compound as a light yellow oil (29.0 mg, 25%). IR  $\nu_{\text{max}}/\text{cm}^{-1}$  (neat): 2931, 2863, 1736, 1450, 1364, 1288, 1115, 1090, 1065;  $^1\text{H}$  NMR (500 MHz,  $\text{CDCl}_3$ )  $\delta$  3.75 (2 H, s), 3.17 (1 H, tt,  $J$  = 3.9, 11.8 Hz), 2.86 (1 H, dd,  $J$  = 3.4, 6.3 Hz), 1.97 – 1.45 (16 H, m), 1.29 – 1.16 (2 H, m), 1.08 (21 H, m);  $^{13}\text{C}$  NMR (126 MHz,  $\text{CDCl}_3$ )  $\delta$  169.7, 68.8, 61.4, 52.6, 49.0, 31.8, 31.6, 25.8, 25.8, 25.7, 25.3, 19.8, 19.1, 18.0, 17.8, 11.9;  $m/z$  HRMS found  $[\text{M} + \text{H}]^+$  394.3127,  $\text{C}_{23}\text{H}_{44}\text{NO}_2\text{Si}$  requires 394.3136.

***cis*-7-methyl-8-oxo-7-azabicyclo[4.2.0]octan-6-yl)methyl pivalate (2m)**

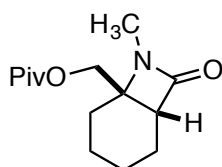

Prepared according to general procedure A using (1-(methylamino)cyclohexyl)methyl pivalate (68.2 mg, 0.3 mmol),  $\text{Pd}(\text{OAc})_2$  (6.7 mg, 0.03 mmol), Xantphos (17 mg, 0.03 mmol), 1,4-benzoquinone (65 mg, 0.6 mmol) and silver(I) acetate (150 mg, 0.9 mmol) in toluene (3 mL) at 80 °C for 18 hours. Purification by flash column chromatography (30% EtOAc in P.E.) gave the desired product as a colorless oil (65.6 mg, 86%). IR  $\nu_{\text{max}}/\text{cm}^{-1}$  (film): 2939, 2872, 1727, 1480, 1461, 1421, 1389, 1366, 1281, 1148, 1032.  $^1\text{H}$  NMR (400 MHz,  $\text{CDCl}_3$ )  $\delta$ : 4.30 (1 H, d,  $J$  = 11.9 Hz), 3.92 (1 H, d,  $J$  = 11.9 Hz), 2.99 – 2.97 (1 H, m), 2.65 (3 H, s), 1.88 – 1.72 (2 H, m), 1.66 – 1.45 (6 H, m), 1.17 (9H, s).  $^{13}\text{C}$  NMR (101 MHz,  $\text{CDCl}_3$ )  $\delta$ : 178.1, 170.0, 65.9, 58.6, 49.6, 39.0, 27.2, 24.8, 24.3, 19.4, 18.7, 17.1.  $m/z$  HRMS found  $[\text{M} + \text{H}]^+$  254.1751,  $\text{C}_{14}\text{H}_{24}\text{O}_3\text{N}$  requires 254.1751

***cis*-7-methyl-6-(((triisopropylsilyl)oxy)methyl)-7-azabicyclo[4.2.0]octan-8-one (2n)**

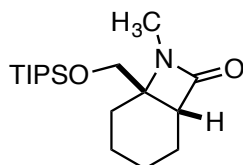

To a 250 mL round-bottomed flask equipped with large oval shaped stirrer bar was added palladium (II) acetate (168 mg, 0.75 mmol, 0.1 equiv), silver(I) acetate (3.75 g, 22.5 mmol, 3 equiv), Xantphos (425 mg, 0.75 mmol, 0.1 equiv) and 1,4-benzoquinone (1.65 g, 15 mmol, 2 equiv). *N*-methyl-1-

(((triisopropylsilyl)oxy)methyl)cyclohexan-1-amine (2.24 g, 7.5 mmol) was subsequently dissolved in toluene (30 mL) and added to the flask. The flask was sealed with a new septa and Teflon tape and purged with a balloon of CO (3 cycles). The flask was placed into a preheated oil bath at 80 °C and stirred vigorously for 18 hours. The flask was allowed to cool to room temperature, filtered over a plug of celite and washed with EtOAc. The solvent was removed *in vacuo* and the crude product was purified by flash column chromatography (5% EtOAc in P.E. to 30% EtOAc in P.E.) and subsequently by flash column chromatography over alumina (5% EtOAc in P.E. to 30% EtOAc in P.E.) to afford the product as a colourless oil (1.98 g, 81%). IR ( $\nu_{\text{max}}/\text{cm}^{-1}$ ): 2941, 2865, 1746, 1463, 1418, 1387, 1334, 1295, 1247, 1116, 1092, 1066.  $^1\text{H}$  NMR (400 MHz,  $\text{CDCl}_3$ )  $\delta$ : 3.74 (1 H, d,  $J = 10.1$  Hz), 3.86 (1 H, d,  $J = 10.1$  Hz), 2.92 – 2.90 (1 H, m), 2.71 (3 H, s), 1.88 – 1.77 (2 H, m), 1.62 – 1.45 (6 H, m), 1.09 – 1.02 (21 H, m).  $^{13}\text{C}$  NMR (101 MHz,  $\text{CDCl}_3$ )  $\delta$ : 170.6, 67.8, 60.2, 49.2, 25.1, 24.3, 19.7, 19.2, 18.1, 17.7, 12.0.  $m/z$  HRMS found  $[\text{M} + \text{H}]^+$  326.2503,  $\text{C}_{18}\text{H}_{36}\text{NO}_2\text{Si}$  requires 326.2510

***cis*-(7-methyl-8-oxo-3-oxa-7-azabicyclo[4.2.0]octan-6-yl)methyl pivalate (2o)**

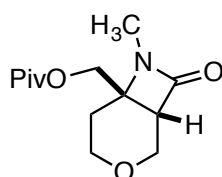

Prepared according to general procedure A using (4-(methylamino)tetrahydro-2*H*-pyran-4-yl)methyl pivalate (73.5 mg, 0.3 mmol),  $\text{Pd}(\text{OAc})_2$  (6.7 mg, 0.03 mmol), Xantphos (17 mg, 0.03 mmol), 1,4-benzoquinone (65 mg, 0.6 mmol) and silver(I) acetate (150 mg, 0.9 mmol) in toluene (3 mL) at 80 °C for 18 hours. Purification by flash column chromatography (gradient elution: 50% EtOAc in P.E. to 80% EtOAc in P.E.) gave the desired product as a colorless oil (65.6 mg, 86%). IR  $\nu_{\text{max}}/\text{cm}^{-1}$  (film): 2973, 2874, 1732, 1614, 1480, 1460, 1415, 1359, 1339, 1148, 1118.  $^1\text{H}$  NMR (400 MHz,  $\text{CDCl}_3$ )  $\delta$ : 5.59 (1 H, dd,  $J = 10.7, 17.3$  Hz), 5.41 (1 H, d,  $J = 10.8$  Hz), 5.22 (1 H, d,  $J = 17.4$  Hz), 4.29 (1 H, d,  $J = 11.8$  Hz), 4.11 (1 H, d,  $J = 11.8$  Hz), 3.03 (1 H, td,  $J = 2.9, 12.3$  Hz), 2.94 (3 H, s), 2.72 (1 H, ddd,  $J = 3.3, 5.9, 12.3$  Hz), 2.32 (1 H, ddd,  $J = 3.2, 11.7, 14.4$  Hz), 2.08 (1 H, ddd,  $J = 2.9, 4.9, 14.0$  Hz), 1.19 (9 H, s).  $^{13}\text{C}$  NMR (101 MHz,  $\text{CDCl}_3$ )  $\delta$ : 177.8, 167.1, 135.3, 118.2, 66.1, 64.5, 39.0, 32.5, 31.2, 27.2, 22.8.  $m/z$  HRMS found  $[\text{M} + \text{H}]^+$  256.1540,  $\text{C}_{13}\text{H}_{22}\text{O}_4\text{N}$  requires 256.1549

***cis*-(7-methyl-8-oxo-3-thia-7-azabicyclo[4.2.0]octan-6-yl)methyl pivalate (2p)**

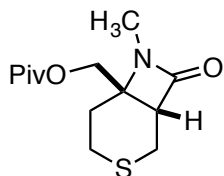

Prepared according to general procedure A using (4-(methylamino)tetrahydro-2*H*-thiopyran-4-yl)methyl pivalate (68.8 mg, 0.3 mmol), Pd(OAc)<sub>2</sub> (6.7 mg, 0.03 mmol), Xantphos (17 mg, 0.03 mmol), 1,4-benzoquinone (65 mg, 0.6 mmol) and silver(I) acetate (150 mg, 0.9 mmol) in toluene (3 mL) at 80 °C for 18 hours. Purification by flash column chromatography (30% EtOAc in P.E.) gave the desired product as a colorless oil (65.5 mg, 84%). IR  $\nu_{\text{max}}/\text{cm}^{-1}$  (film): 2979, 1732, 1683, 1480, 1462, 1396, 1280, 1149, 1070, 1037. <sup>1</sup>H NMR (400 MHz, CDCl<sub>3</sub>)  $\delta$ : 4.55 – 4.51 (1 H, m), 4.38 – 4.35 (1 H, m), 3.94 – 3.86 (3 H, m), 2.75 (3 H, s), 2.68 – 2.61 (1 H, m), 2.49 – 2.43 (1 H, m), 2.06 – 2.01 (1 H, m), 1.84 – 1.77 (1 H, m), 1.15 (9 H, s). <sup>13</sup>C NMR (101 MHz, CDCl<sub>3</sub>)  $\delta$ : 177.9, 173.3, 79.3, 73.5, 66.9, 64.0, 38.9, 38.2, 32.6, 27.2, 25.6. *m/z* HRMS found [M + H]<sup>+</sup> 272.1314, C<sub>13</sub>H<sub>22</sub>O<sub>3</sub>NS requires 272.1320.

***cis*-(7-methyl-8-oxo-3-tosyl-3,7-diazabicyclo[4.2.0]octan-6-yl)methyl pivalate (2q)**

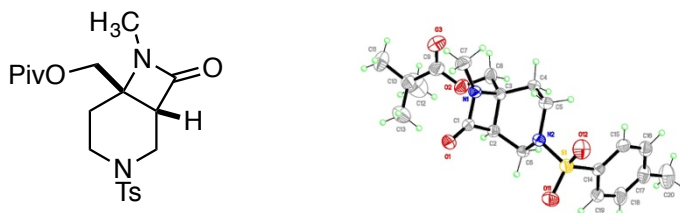

Prepared according to general procedure A using (4-(methylamino)-1-tosylpiperidin-4-yl)methyl pivalate (114.7 mg, 0.3 mmol), Pd(OAc)<sub>2</sub> (6.7 mg, 0.03 mmol), Xantphos (17 mg, 0.03 mmol), 1,4-benzoquinone (65 mg, 0.6 mmol) and silver(I) acetate (150 mg, 0.9 mmol) in toluene (3 mL) at 80 °C for 18 hours. Purification by flash column chromatography (30% EtOAc in P.E.) gave the desired product as an off-white solid (89.0 mg, 73%). m.p. 140–142 °C; IR  $\nu_{\text{max}}/\text{cm}^{-1}$  (film): 2959, 1756, 1737, 1716, 1599, 1461, 1399, 1378, 1358, 1340, 1308, 1286, 1166, 1090, 1040. <sup>1</sup>H NMR (400 MHz, CDCl<sub>3</sub>)  $\delta$ : 7.64 (2 H, d, *J* = 8.2 Hz), 7.29 (2 H, d, *J* = 8.2 Hz), 4.35 (1 H, d, *J* = 11.9 Hz), 3.92 (1 H, d, *J* = 11.9 Hz), 3.65 (1 H, dd, *J* = 3.3, 13.1 Hz), 3.47 (1 H, dt, *J* = 5.0, 12.0 Hz), 3.32 (1 H, dd, *J* = 5.9, 13.0 Hz), 3.14 (1 H, dd, *J* = 3.3, 5.6 Hz), 3.00 (1 H, td, *J* = 4.1, 11.7 Hz), 2.61 (3 H, s), 2.39 (3 H, s), 2.00 – 1.94 (1 H, m), 1.84 – 1.77 (1 H, m), 1.15 (9 H, s). <sup>13</sup>C NMR (101 MHz, CDCl<sub>3</sub>)  $\delta$ : 177.7, 166.7, 143.8, 134.3, 129.8, 127.5, 64.5, 56.8, 49.7, 40.0, 39.2, 39.0, 27.1, 25.2, 25.0, 21.6. *m/z* HRMS found [M + H]<sup>+</sup> 409.1793, C<sub>20</sub>H<sub>29</sub>O<sub>5</sub>N<sub>2</sub>S requires 409.1792.

**(2-ethyl-1,3-dimethyl-4-oxoazetidin-2-yl)methyl pivalate (2r)**

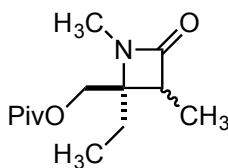

Prepared according to general procedure A using 2-ethyl-2-(methylamino)butyl pivalate (65.0 mg, 0.3 mmol), Pd(OAc)<sub>2</sub> (6.7 mg, 0.03 mmol), Xantphos (17 mg, 0.03 mmol), 1,4-benzoquinone (65 mg, 0.6 mmol) and silver(I) acetate (150 mg, 0.9 mmol) in toluene (3 mL) at 80 °C for 18 hours. The crude product was purified by flash column chromatography (10% EtOAc in P.E.) and subsequently by flash column chromatography over alumina (10% EtOAc in P.E.) to afford the product as a yellow oil (53.0 mg, 73%, inseparable 1:1 mixture of diastereomers). IR  $\nu_{\text{max}}/\text{cm}^{-1}$  (film): 2964, 2940, 1728, 1479, 1459, 1417, 1395, 1368, 1276, 1146, 1086, 1039; <sup>1</sup>H NMR (400 MHz, CDCl<sub>3</sub>)  $\delta$ : 4.41 (1 H, d,  $J$  = 12.0 Hz), 4.37 (1 H, d,  $J$  = 11.9 Hz), 4.08 (1 H, d,  $J$  = 11.9 Hz), 4.04 (1 H, d,  $J$  = 12.0 Hz), 3.01 (2 H, q,  $J$  = 7.6 Hz), 2.72 (3 H, s), 2.71 (3 H, s), 1.96 – 1.81 (2 H, m), 1.72 – 1.61 (1 H, m), 1.61 – 1.52 (1 H, m), 1.24–1.20 (6 H, m), 1.21 (9 H, s), 1.20 (9 H, s), 0.96 (3 H, t,  $J$  = 7.6 Hz), 0.93 (3 H, t,  $J$  = 7.5 Hz); <sup>13</sup>C NMR (101 MHz, CDCl<sub>3</sub>)  $\delta$ : 178.1, 178.1, 170.3, 170.2, 64.7, 64.7, 62.5, 62.3, 50.9, 49.7, 39.1, 39.0, 27.3, 27.3, 26.0, 25.4, 25.3, 22.9, 9.1, 9.1, 9.0, 8.3; m/z HRMS found  $[M + H]^+$  242.1751, C<sub>13</sub>H<sub>24</sub>NO<sub>3</sub> requires 242.1751.

***N*-(2-(*cis*-7-methyl-8-oxo-7-azabicyclo[4.2.0]octan-6-yl)ethyl)phthalimide (2s)**

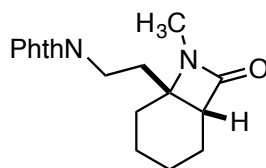

Prepared according to general procedure A using *N*-(2-(1-(methylamino)cyclohexyl)ethyl)phthalimide (57.3 mg, 0.3 mmol), Pd(OAc)<sub>2</sub> (9.3 mg, 0.03 mmol), Xantphos (17 mg, 0.03 mmol), 1,4-benzoquinone (65 mg, 0.6 mmol) and silver(I) pivalate (189 mg, 0.9 mmol) in toluene (3 mL) at 80 °C for 18 hours. The crude product was purified by flash column chromatography (gradient elution: 30% EtOAc in P.E. to 60% EtOAc in P.E.) and subsequently by flash column chromatography over alumina (gradient elution: 20% EtOAc in P.E. to 50% EtOAc in P.E.) to afford the product as a white crystalline solid (74.5 mg, 80%) (Product contains 5 % impurity by <sup>1</sup>H NMR spectroscopy). m.p. 124–126 °C. IR  $\nu_{\text{max}}/\text{cm}^{-1}$  (film): 2937, 2872, 1771, 1736, 1707, 1614, 1466, 1436, 1407, 1394, 1378, 1275, 1252, 1189, 1138, 1092. <sup>1</sup>H NMR (400 MHz, CDCl<sub>3</sub>)  $\delta$ : 7.85 (2 H, dd,  $J$  = 3.1, 5.5 Hz), 7.72 (2

H, dd,  $J = 3.1, 5.5$  Hz), 3.81 – 3.66 (2 H, m), 3.08 – 3.06 (1 H, m), 2.74 (3 H, s), 2.09 – 2.01 (1 H, m), 1.97 – 1.89 (2 H, m), 1.76 – 1.45 (7 H, m).  $^{13}\text{C}$  NMR (101 MHz,  $\text{CDCl}_3$ )  $\delta$ : 170.0, 168.2, 134.3, 132.2, 123.5, 58.5, 51.4, 35.5, 33.5, 27.2, 24.5, 19.4, 18.2, 17.1.  $m/z$  HRMS found  $[\text{M} + \text{H}]^+$  313.1552,  $\text{C}_{18}\text{H}_{21}\text{N}_2\text{O}_3$  requires 313.1552

***cis*-(8-methyl-9-oxo-8-azabicyclo[5.2.0]nonan-7-yl)methyl pivalate (2t)**

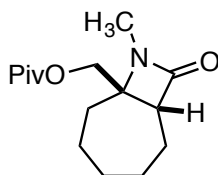

Prepared according to general procedure A using (1-(methylamino)cycloheptyl)methyl pivalate (72.4 mg, 0.3 mmol),  $\text{Pd}(\text{OAc})_2$  (6.7 mg, 0.03 mmol), Xantphos (17 mg, 0.03 mmol), 1,4-benzoquinone (65 mg, 0.6 mmol) and silver(I) acetate (150 mg, 0.9 mmol) in toluene (3 mL) at 80 °C for 18 hours. Purification by flash column chromatography (20% EtOAc in P.E.) gave the desired product as a colorless oil (71.0 mg, 89%). IR  $\nu_{\text{max}}/\text{cm}^{-1}$  (film): 2926, 2859, 1728, 1480, 1450, 1421, 1392, 1366, 1281, 1146, 1090, 1059, 1035.  $^1\text{H}$  NMR (400 MHz,  $\text{CDCl}_3$ )  $\delta$ : 4.35 – 4.31 (1 H, m), 3.97 (1 H, dt,  $J = 1.6, 11.9$  Hz), 3.08 (1 H, d, 4.4 Hz), 2.66 (3 H, s), 1.89 – 1.80 (2 H, m), 1.64 – 1.33 (8 H, m), 1.17 (9 H, s).  $^{13}\text{C}$  NMR (101 MHz,  $\text{CDCl}_3$ )  $\delta$ : 178.0, 1692, 66.3, 63.8, 56.2, 39.0, 31.6, 30.0, 27.2, 27.1, 25.7, 24.8, 24.0.  $m/z$  HRMS found  $[\text{M} + \text{H}]^+$  268.1907,  $\text{C}_{15}\text{H}_{26}\text{O}_3\text{N}$  requires 268.1907

***cis*-(6-methyl-7-oxo-6-azabicyclo[3.2.0]heptan-5-yl)methyl pivalate (2u)**

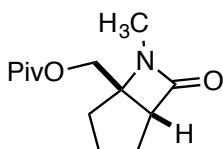

Prepared according to general procedure A using (1-(methylamino)cyclopentyl)methyl pivalate (64.0 mg, 0.3 mmol),  $\text{Pd}(\text{OAc})_2$  (6.7 mg, 0.03 mmol), Xantphos (17 mg, 0.03 mmol), 1,4-benzoquinone (65 mg, 0.6 mmol) and silver(I) acetate (150 mg, 0.9 mmol) in toluene (3 mL) at 80 °C for 18 hours. Purification by flash column chromatography (40% EtOAc in P.E.) gave the desired product as a colorless oil (59.0 mg, 82%). IR  $\nu_{\text{max}}/\text{cm}^{-1}$  (film): 2959, 2874, 1728, 1481, 1461, 1419, 1335, 1282, 1150, 1084.  $^1\text{H}$  NMR (400 MHz,  $\text{CDCl}_3$ )  $\delta$ : 4.50 (1 H, d,  $J = 11.9$  Hz), 4.07 (1 H, d,  $J = 11.9$  Hz), 3.22 (1 H, app d,  $J = 7.6$  Hz), 2.65 (3 H, s), 2.00 – 1.95 (1 H, m), 1.92 – 1.84 (2 H, m), 1.68 – 1.55 (1

H, m), 1.51 – 1.42 (1 H, m), 1.31 – 1.22 (1 H, m), 1.17 (9 H, s).  $^{13}\text{C}$  NMR (101 MHz,  $\text{CDCl}_3$ )  $\delta$ : 178.0, 168.8, 68.6, 64.5, 57.2, 39.0, 27.8, 27.2, 25.1, 24.4, 23.7.  $m/z$  HRMS found  $[\text{M} + \text{H}]^+$  240.1593,  $\text{C}_{13}\text{H}_{22}\text{O}_3\text{N}$  requires 240.1594.

***cis*-2-methyl-1-(2-((triisopropylsilyl)oxy)ethyl)-2-azabicyclo[2.2.0]hexan-3-one (2v)**

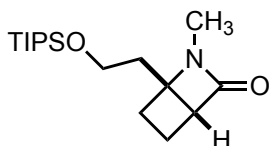

Prepared according to general procedure A using *N*-methyl-1-(2-((triisopropylsilyl)oxy)ethyl)cyclobutan-1-amine (85.7 mg, 0.3 mmol),  $\text{Pd}(\text{OPiv})_2$  (6.7 mg, 0.03 mmol), Xantphos (17 mg, 0.03 mmol), 1,4-benzoquinone (65 mg, 0.6 mmol) and silver(I) acetate (150 mg, 0.9 mmol) in toluene (3 mL) at 80 °C for 18 hours. The crude product was purified by flash column chromatography (gradient elution: 5% EtOAc in P.E. to 30% EtOAc in P.E.) and subsequently by flash column chromatography over alumina (gradient elution: 5% EtOAc in P.E. to 30% EtOAc in P.E.) to afford the product as a colourless oil (78.9 mg, 84%). IR  $\nu_{\text{max}}/\text{cm}^{-1}$  (film): 2942, 2866, 1744, 1463, 1413, 13784, 1292, 1246, 1225, 1187, 1097.  $^1\text{H}$  NMR (400 MHz,  $\text{CDCl}_3$ )  $\delta$ : 3.75 (2 H, dt,  $J = 1.0, 6.3$  Hz), 3.40 (1 H, dd,  $J = 2.2, 8.9$  Hz), 2.75 (3 H, s), 2.37 – 2.28 (1 H, m), 2.20 (1 H, dt,  $J = 5.5, 12.3$  Hz), 2.06 – 1.92 (2 H, m), 1.90 (2 H, t,  $J = 6.3$  Hz), 1.09 – 1.02 (21 H, m).  $^{13}\text{C}$  NMR (101 MHz,  $\text{CDCl}_3$ )  $\delta$ : 171.4, 62.5, 59.8, 52.8, 35.3, 27.1, 24.9, 18.1 (TIPS  $\text{CH}_3$  and cyclo- $\text{C}_4$ ), 12.0.  $m/z$  HRMS found  $[\text{M} + \text{H}]^+$  312.2354,  $\text{C}_{17}\text{H}_{34}\text{NSi}$  requires 312.2353

***cis*-3-methyl-4-oxo-3-azatricyclo[4.2.1.0<sup>2,5</sup>]nonan-2-yl)methyl pivalate (2w)**

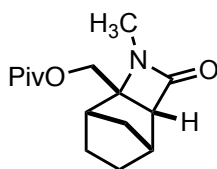

Prepared according to general procedure A using endo-2-(methylamino)norbornane-2-methyl pivalate (71.8 mg, 0.3 mmol),  $\text{Pd}(\text{OAc})_2$  (6.7 mg, 0.03 mmol), Xantphos (17 mg, 0.03 mmol), 1,4-benzoquinone (65 mg, 0.6 mmol) and silver(I) acetate (150 mg, 0.9 mmol) in toluene (3 mL) at 80 °C for 18 hours. The crude product was purified by flash column chromatography (gradient elution: 5% EtOAc in P.E. to 20% EtOAc in P.E.) and subsequently by flash column chromatography over

alumina (gradient elution: 5% EtOAc in P.E. to 30% EtOAc in P.E.) to afford the product as a colourless oil (55.0 mg, 69%). IR  $\nu_{\text{max}}/\text{cm}^{-1}$  (film): 2959, 2878, 1724, 1480, 1459, 1419, 1382, 1331, 1303, 1281, 1149.  $^1\text{H}$  NMR (400 MHz,  $\text{CDCl}_3$ )  $\delta$ : 4.49 (1 H, d,  $J = 12.3$  Hz), 4.01 (1 H, d,  $J = 12.3$  Hz), 3.19 (1 H, d,  $J = 5.7$  Hz), 2.73 (3 H, s), 2.45 (1 H, br s), 2.24 (1 H, app. d,  $J = 3.3$  Hz), 1.77 (1 H, d,  $J = 10.6$  Hz), 1.67 – 1.53 (4 H, m), 1.44 – 1.39 (1 H, m), 1.19 (9 H, s).  $^{13}\text{C}$  NMR (101 MHz,  $\text{CDCl}_3$ )  $\delta$ : 178.2, 169.0, 69.1, 62.8, 61.3, 43.4, 39.3, 39.1, 36.5, 27.3, 27.1, 25.8, 24.3.  $m/z$  HRMS found  $[\text{M} + \text{H}]^+$  266.1752,  $\text{C}_{15}\text{H}_{24}\text{O}_3\text{N}$  requires 266.1751

***cis*-2-(2-(1-tosyl-1H-indol-3-yl)ethyl)-1-(2-((triisopropylsilyl)oxy)ethyl)-2-azabicyclo[2.2.0]hexan-3-one (2x)**

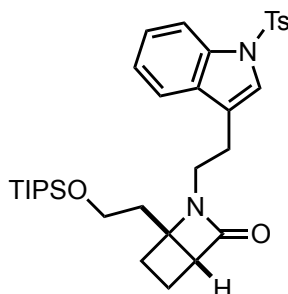

Prepared according to general procedure A using *N*-(2-(1-tosyl-1H-indol-3-yl)ethyl)-1-(2-((triisopropylsilyl)oxy)ethyl)cyclobutan-1-amine (171.0 mg, 0.3 mmol),  $\text{Pd}(\text{OAc})_2$  (6.7 mg, 0.03 mmol), Xantphos (17 mg, 0.03 mmol), 1,4-benzoquinone (65 mg, 0.6 mmol) and silver(I) acetate (150 mg, 0.9 mmol) in toluene (3 mL) at 80 °C for 18 hours. The crude product was purified by flash column chromatography (20% EtOAc in P.E.) and subsequently by flash column chromatography over alumina (20% EtOAc in P.E.) to afford the product as a viscous yellow oil (145 mg, 81%). IR  $\nu_{\text{max}}/\text{cm}^{-1}$  (film): 2937, 2869, 1732, 1461, 1447, 1395, 1378, 1352, 1308, 1274, 1245, 1203, 1167, 1134, 1115, 1098, 1066, 1013;  $^1\text{H}$  NMR (400 MHz,  $\text{CDCl}_3$ )  $\delta$ : 7.99 (1 H, d,  $J = 8.3$  Hz), 7.76 (2 H, d,  $J = 8.4$  Hz), 7.49 (1 H, d,  $J = 7.8$  Hz), 7.45 (1 H, s), 7.32 (1 H, app t,  $J = 7.7$  Hz), 7.26 – 7.19 (3 H, m), 3.72 (2 H, td,  $J = 1.8, 6.1$  Hz), 3.55 (1 H, ddd,  $J = 6.4, 9.1, 14.1$  Hz), 3.45 – 3.35 (2 H, m), 3.11 – 2.95 (2 H, m), 2.33 (3 H, s), 2.30 – 2.18 (2 H, m), 1.90 (2 H, d,  $J = 7.2$  Hz), 1.84 (2 H, t,  $J = 6.1$  Hz), 1.08 – 0.96 (21 H, m);  $^{13}\text{C}$  NMR (101 MHz,  $\text{CDCl}_3$ )  $\delta$ : 171.6, 144.9, 135.5, 135.3, 130.7, 130.0, 127.0, 125.0, 123.4, 123.3, 119.7, 119.4, 113.9, 63.0, 59.9, 52.7, 40.1, 35.9, 28.2, 24.6, 21.7, 18.1, 17.9, 12.0;  $m/z$  HRMS found  $[\text{M} + \text{H}]^+$  595.3009,  $\text{C}_{33}\text{H}_{47}\text{N}_2\text{O}_4\text{SSi}$  requires 595.3020.

***cis*-8-methyl-3-tosyl-1-(2-((triisopropylsilyl)oxy)ethyl)-3,8-diazabicyclo[4.2.0]octan-7-one (2y)**

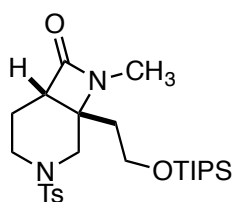

Prepared according to general procedure A using *N*-methyl-1-tosyl-3-(2-((triisopropylsilyl)oxy)ethyl)piperidin-3-amine (140.6 mg, 0.3 mmol), Pd(OAc)<sub>2</sub> (9.3 mg, 0.03 mmol), Xantphos (17 mg, 0.03 mmol), 1,4-benzoquinone (65 mg, 0.6 mmol) and silver(I) pivalate (189 mg, 0.9 mmol) in toluene (3 mL) at 80 °C for 18 hours. The crude product was purified by flash column chromatography (gradient elution: 5% EtOAc in P.E. to 30% EtOAc in P.E.) and subsequently by flash column chromatography over alumina (gradient elution: 5% EtOAc in P.E. to 30% EtOAc in P.E.) to afford the product as a colourless oil (87.0 mg, 59%). IR  $\nu_{\text{max}}/\text{cm}^{-1}$  (film): 2943, 2866, 1744, 1598, 1463, 1421, 1390, 1338, 1250, 1162, 1092. <sup>1</sup>H NMR (400 MHz, CDCl<sub>3</sub>)  $\delta$ : 7.65 (2 H, d,  $J$  = 8.3 Hz), 7.30 (2 H,  $J$  = 8.1 Hz), 3.81 – 3.76 (3 H, m), 3.49 (1 H, dt,  $J$  = 6.1, 11.6 Hz), 3.19 (1 H, t,  $J$  = 3.7 Hz), 3.13 (1 H, ddd,  $J$  = 2.3, 7.1, 10.8 Hz), 3.00 (1 H, d,  $J$  = 13.6 Hz), 2.67 (3 H, s), 2.41 (3 H, s), 2.06 (1 H, dqt, 3.1, 14.9 Hz), 1.92 – 1.69 (3 H, m), 1.03 – 0.99 (21 H, m). <sup>13</sup>C NMR (101 MHz, CDCl<sub>3</sub>)  $\delta$ : 168.2, 143.6, 134.9, 129.9, 127.3, 59.4, 59.3, 50.6, 44.6, 40.9, 36.8, 24.4, 21.6, 19.5, 18.1, 11.9. *m/z* HRMS found  $[M + \text{NH}_4]^+$  512.2964, C<sub>25</sub>H<sub>46</sub>O<sub>4</sub>N<sub>3</sub>SSi requires 512.2973.

***cis*-(2-methyl-1-oxo-1,3,4,8b-tetrahydronaphtho[2,1-*b*]azet-2a(2*H*)-yl)methyl pivalate (2z)**

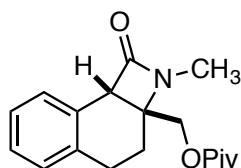

Prepared according to general procedure A using (2-(methylamino)-1,2,3,4-tetrahydronaphthalen-2-yl)methyl pivalate (82.6 mg, 0.3 mmol), Pd(OAc)<sub>2</sub> (6.7 mg, 0.03 mmol), Xantphos (17 mg, 0.03 mmol), 1,4-benzoquinone (65 mg, 0.6 mmol) and silver(I) acetate (150 mg, 0.9 mmol) in toluene (3 mL) at 80 °C for 18 hours. Purification by flash column chromatography (30% EtOAc in P.E.) and subsequently by flash column chromatography over alumina (30% EtOAc in P.E.) gave the desired product as a colorless oil (77.0 mg, 86%). IR  $\nu_{\text{max}}/\text{cm}^{-1}$  (film): 2971, 1746, 1729, 1480, 1458, 1419, 1387, 1366, 1281, 1253, 1226, 1208, 1143, 1052, 1036. <sup>1</sup>H NMR (400 MHz, CDCl<sub>3</sub>)  $\delta$ : 7.22 – 7.14 (4 H, m), 4.59 (1 H, d,  $J$  = 12.1 Hz), 4.08 – 4.05 (2 H, m), 2.78 (3 H, s), 2.75 – 2.61 (2 H, m), 2.19 (1 H,

dt,  $J = 3.5, 14.1$  Hz), 1.48 (1 H, td,  $J = 4.3, 13.5$  Hz), 1.25 (9 H, s).  $^{13}\text{C}$  NMR (101 MHz,  $\text{CDCl}_3$ )  $\delta$ : 178.0, 166.0, 137.5, 130.2, 129.5, 28.3, 127.5, 127.2, 65.4, 61.3, 56.2, 39.1, 27.3, 25.4, 25.2, 24.2.  $m/z$  HRMS found  $[\text{M} + \text{H}]^+$  302.1750,  $\text{C}_{18}\text{H}_{24}\text{O}_3\text{N}$  requires 302.1751

**(*cis* -7-benzyl-8-oxo-7-azabicyclo[4.2.0]octan-6-yl)methyl pivalate (2aa)**

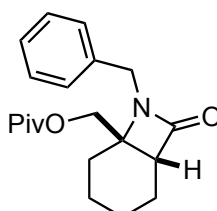

Prepared according to general procedure A using (1-(benzylamino)cyclohexyl)methyl pivalate (91.0 mg, 0.3 mmol),  $\text{Pd}(\text{OAc})_2$  (6.7 mg, 0.03 mmol), Xantphos (17 mg, 0.03 mmol), 1,4-benzoquinone (65 mg, 0.6 mmol) and silver(I) acetate (150 mg, 0.9 mmol) in toluene (3 mL) at 80 °C for 18 hours. The crude mixture was purified by flash column chromatography (gradient elution, 10% EtOAc in P.E. to 30% EtOAc in P.E.) and subsequently by flash column chromatography over alumina (gradient elution, 10% EtOAc in P.E. to 30% EtOAc in P.E.) to afford (*cis* -7-benzyl-8-oxo-7-azabicyclo[4.2.0]octan-6-yl)methyl pivalate (56 mg, 57%). m.p. 74–76 °C; IR  $\nu_{\text{max}}/\text{cm}^{-1}$  (film): 2933, 2877, 1719, 1498, 1479, 1467, 1451, 1435, 1403, 1358, 1336, 1284, 1199, 1163, 1054, 1033;  $^1\text{H}$  NMR (400 MHz,  $\text{CDCl}_3$ )  $\delta$ : 7.34 – 7.24 (5 H, m), 4.29 (2 H, q,  $J = 15.2$  Hz), 4.10 (1 H, d,  $J = 12.0$  Hz), 3.92 (1 H, d,  $J = 11.9$  Hz) 3.06 (1 H, dd,  $J = 3.8, 6.4$  Hz), 1.91 (1 H, ddd,  $J = 2.6, 5.3, 8.6$  Hz), 1.71 – 1.54 (3 H, m), 1.51 – 1.34 (3 H, m), 1.32 – 1.20 (1 H, m), 1.16 (9 H, s);  $^{13}\text{C}$  NMR (101 MHz,  $\text{CDCl}_3$ )  $\delta$ : 178.1, 170.0, 136.8, 128.8, 128.6, 127.8, 66.2, 59.8, 50.1, 43.9, 39.1, 27.3, 25.1, 19.7, 18.7, 17.1;  $m/z$  HRMS found  $[\text{M} + \text{H}]^+$  330.2064,  $\text{C}_{20}\text{H}_{28}\text{NO}_3$  requires 330.2064.

**(1-(1-oxoisindolin-2-yl)cyclohexyl)methyl pivalate (3aa)**

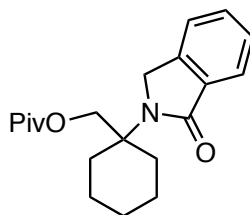

Prepared according to general procedure A using (1-(benzylamino)cyclohexyl)methyl pivalate (91.0 mg, 0.3 mmol), Pd(OAc)<sub>2</sub> (6.7 mg, 0.03 mmol), Xantphos (17 mg, 0.03 mmol), 1,4-benzoquinone (65 mg, 0.6 mmol) and silver(I) acetate (150 mg, 0.9 mmol) in toluene (3 mL) at 80 °C for 18 hours. The crude mixture was purified by flash column chromatography (gradient elution, 10% EtOAc in P.E. to 30% EtOAc in P.E.) and subsequently by flash column chromatography over alumina (gradient elution, 10% EtOAc in P.E. to 30% EtOAc in P.E.) to afford (1-(1-oxoisindolin-2-yl)cyclohexyl)methyl pivalate (23 mg, 23%) as a white solid. m.p. 86–88 °C; IR  $\nu_{\text{max}}$ /cm<sup>-1</sup> (film): 2936, 2863, 1723, 1671, 1479, 1469, 1443, 1388, 1366, 1327, 1301, 1281, 1138, 1071, 1034; <sup>1</sup>H NMR (400 MHz, CDCl<sub>3</sub>)  $\delta$ : 7.79 (1 H, d,  $J$  = 7.5 Hz), 7.52 (1 H, td,  $J$  = 1.1, 7.4 Hz), 7.46 – 7.40 (2 H, m), 4.57 (2 H, s), 4.39 (2 H, s), 2.60 – 2.52 (2 H, m), 1.82 – 1.73 (2 H, m), 1.72 – 1.51 (6 H, m), 1.10 (9 H, s); <sup>13</sup>C NMR (101 MHz, CDCl<sub>3</sub>)  $\delta$ : 178.3, 169.7, 141.0, 134.1, 131.3, 128.0, 123.5, 122.3, 67.7, 59.5, 49.2, 39.0, 31.9, 27.3, 25.8, 22.3; m/z HRMS found [M + H]<sup>+</sup> 330.2063, C<sub>20</sub>H<sub>28</sub>NO<sub>3</sub> requires 330.2064.

***cis*-7-(4-methylbenzyl)-8-oxo-7-azabicyclo[4.2.0]octan-6-yl)methyl pivalate (2ab)**

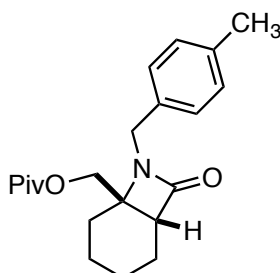

Prepared according to general procedure A using (1-((4-methylbenzyl)amino)cyclohexyl)methyl pivalate (95.2 mg, 0.3 mmol), Pd(OAc)<sub>2</sub> (9.3 mg, 0.03 mmol), Xantphos (17 mg, 0.03 mmol), 1,4-benzoquinone (65 mg, 0.6 mmol) and silver(I) acetate (150 mg, 0.9 mmol) in toluene (3 mL) at 80 °C for 18 hours. The crude product was purified by flash column chromatography (gradient elution: 100% P.E. to 25% EtOAc in P.E.) and subsequently by flash column chromatography over alumina

(gradient elution: 100 % P.E. to 20% EtOAc in P.E.) to afford the product as a colorless oil (32.7 mg, 32%). IR  $\nu_{\text{max}}/\text{cm}^{-1}$  (film): 2936, 2871, 1728, 1516, 1480, 1458, 1397, 1365, 1346, 1281, 1145, 1035.  $^1\text{H}$  NMR (400 MHz,  $\text{CDCl}_3$ )  $\delta$ : 7.20 (2 H, d,  $J = 8.0$  Hz), 7.10 (2 H, d,  $J = 8.0$  Hz), 4.29 (1 H, d,  $J = 15.1$  Hz), 4.20 (1 H, d,  $J = 15.1$  Hz), 4.08 (1 H, d,  $J = 11.7$  Hz), 3.92 (1 H, d,  $J = 11.71$  Hz), 3.06 – 3.04 (1 H, m), 2.31 (3 H, s), 1.93 – 1.88 (1 H, m), 1.67 – 1.56 (3 H, m), 1.49 – 1.38 (3 H, m), 1.29 – 1.23 (1 H, m), 1.17 (9 H, s).  $^{13}\text{C}$  NMR (101 MHz,  $\text{CDCl}_3$ )  $\delta$ : 178.1, 170.0, 137.5, 133.7, 129.5, 128.5, 66.1, 59.8, 50.0, 43.6, 39.0, 27.3, 25.1, 21.2, 19.6, 18.7, 17.1.  $m/z$  HRMS found  $[\text{M} + \text{H}]^+$  344.2222,  $\text{C}_{21}\text{H}_{30}\text{NO}_3$  requires 344.2220

**(1-(6-methyl-1-oxoisindolin-2-yl)cyclohexyl)methyl pivalate (3ab)**

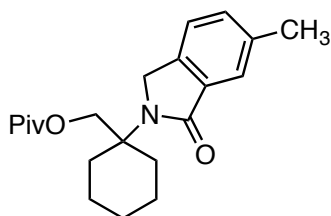

Prepared according to general procedure A using (1-((4-methylbenzyl)amino)cyclohexyl)methyl pivalate (95.2 mg, 0.3 mmol),  $\text{Pd}(\text{OAc})_2$  (9.3 mg, 0.03 mmol), Xantphos (17 mg, 0.03 mmol), 1,4-benzoquinone (65 mg, 0.6 mmol) and silver(I) acetate (150 mg, 0.9 mmol) in toluene (3 mL) at 80 °C for 18 hours. The crude product was purified by flash column chromatography (gradient elution: 100% P.E. to 25% EtOAc in P.E.) and subsequently by flash column chromatography over alumina (gradient elution: 100 % P.E. to 20% EtOAc in P.E.) to afford the product as a colorless oil (51.7 mg, 51%). IR  $\nu_{\text{max}}/\text{cm}^{-1}$  (film): 2933, 2866, 1727, 1680, 1628, 1497, 1480, 1449, 1385, 1321, 1281, 1229, 1194, 1149, 1035.  $^1\text{H}$  NMR (400 MHz,  $\text{CDCl}_3$ )  $\delta$ : 7.58 (1 H, s), 7.34 – 7.26 (2 H, m), 4.52 (2 H, s), 4.38 (2 H, s), 2.55 – 2.52 (2 H, m), 2.43 (3 H, s), 1.78 – 1.73 (2 H, m), 1.68 – 1.42 (6 H, m), 1.10 (9 H, s).  $^{13}\text{C}$  NMR (101 MHz,  $\text{CDCl}_3$ )  $\delta$ : 178.3, 169.8, 138.3, 138.0, 134.2, 132.4, 123.7, 122.0, 67.7, 59.4, 49.0, 39.0, 31.9, 27.3, 25.8, 22.3, 21.5.  $m/z$  HRMS found  $[\text{M} + \text{H}]^+$  344.2221,  $\text{C}_{21}\text{H}_{30}\text{NO}_3$  requires 344.2220

***cis*-7-(4-chlorobenzyl)-8-oxo-7-azabicyclo[4.2.0]octan-6-yl)methyl pivalate (2ac)**

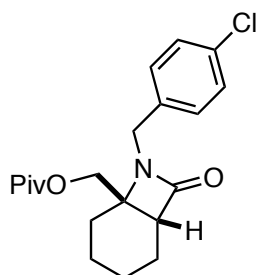

Prepared according to general procedure A using (1-((4-chlorobenzyl)amino)cyclohexyl)methyl pivalate (101.2 mg, 0.3 mmol), Pd(OAc)<sub>2</sub> (9.3 mg, 0.03 mmol), Xantphos (17 mg, 0.03 mmol), 1,4-benzoquinone (65 mg, 0.6 mmol) and silver(I) acetate (150 mg, 0.9 mmol) in toluene (3 mL) at 80 °C for 18 hours. The crude product was purified by flash column chromatography (gradient elution: 100% P.E. to 25% EtOAc in P.E.) and subsequently by flash column chromatography over alumina (gradient elution: 100 % P.E. to 20% EtOAc in P.E.) to afford the product as a colorless oil (56.3 mg, 52%). IR  $\nu_{\text{max}}/\text{cm}^{-1}$  (film): 2936, 2871, 1730, 1492, 1480, 1458, 1396, 1365, 1281, 1146, 1092, 1035. <sup>1</sup>H NMR (400 MHz, CDCl<sub>3</sub>)  $\delta$ : 7.30 – 7.25 (4 H, m), 4.29 (1 H, d,  $J$  = 15.3 Hz), 4.18 (1 H, d,  $J$  = 15.3 Hz), 4.15 (1 H, d,  $J$  = 11.8 Hz), 3.93 (1 H, d,  $J$  = 11.8 Hz), 3.07 (1 H, dd,  $J$  = 3.5, 6.3 Hz), 1.93 – 1.86 (1 H, m), 1.69 – 1.55 (3 H, m), 1.51 – 1.39 (3 H, m), 1.26 – 1.19 (1 H, m), 1.16 (9 H, s). <sup>13</sup>C NMR (101 MHz, CDCl<sub>3</sub>)  $\delta$ : 178.1, 170.1, 135.5, 133.7, 129.8, 129.0, 66.0, 59.9, 50.0, 43.2, 39.0, 27.2, 25.1, 19.6, 18.7, 17.1.  $m/z$  HRMS found  $[M + H]^+$  364.1677, C<sub>20</sub>H<sub>27</sub>ClNO<sub>3</sub> requires 364.1674

**(1-(6-chloro-1-oxoisindolin-2-yl)cyclohexyl)methyl pivalate (3ac)**

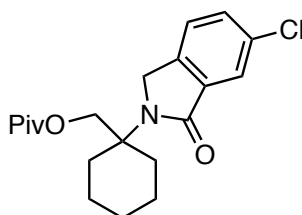

Prepared according to general procedure A using (1-((4-chlorobenzyl)amino)cyclohexyl)methyl pivalate (101.2 mg, 0.3 mmol), Pd(OAc)<sub>2</sub> (9.3 mg, 0.03 mmol), Xantphos (17 mg, 0.03 mmol), 1,4-benzoquinone (65 mg, 0.6 mmol) and silver(I) acetate (150 mg, 0.9 mmol) in toluene (3 mL) at 80 °C for 18 hours. The crude product was purified by flash column chromatography (gradient elution: 100% P.E. to 25% EtOAc in P.E.) and subsequently by flash column chromatography over alumina (gradient elution: 100 % P.E. to 20% EtOAc in P.E.) to afford the product as a colorless needles (13.0 mg, 12%). m.p. 112 °C (sharp). IR  $\nu_{\text{max}}/\text{cm}^{-1}$  (film): 2934, 2867, 1729, 1687, 1449, 1386, 1318, 1282,

1263, 1205, 1152, 1036.  $^1\text{H}$  NMR (400 MHz,  $\text{CDCl}_3$ )  $\delta$ : 7.75 (1 H, d,  $J = 1.8$  Hz), 7.49 (1 H, dd,  $J = 1.8, 8.0$  Hz), 7.35 (1 H, d,  $J = 8.0$  Hz), 4.54 (2 H, s), 4.38 (2 H, s), 2.51 (2 H, m), 1.77 (2 H, ddd,  $J = 3.0, 9.5, 12.6$  Hz), 1.66 – 1.60 (3 H, m), 1.55 – 1.42 (3 H, m), 1.10 (9 H, s).  $^{13}\text{C}$  NMR (101 MHz,  $\text{CDCl}_3$ )  $\delta$ : 178.2, 168.3, 139.1, 135.8, 134.4, 131.6, 123.7, 123.7, 67.6, 59.8, 48.8, 39.0, 31.9, 27.3, 25.7, 22.3.  $m/z$  HRMS found  $[\text{M} + \text{H}]^+$  364.1674,  $\text{C}_{20}\text{H}_{27}\text{ClNO}_3$  requires 364.1677.

***cis*-7-(3-nitrobenzyl)-8-oxo-7-azabicyclo[4.2.0]octan-6-yl)methyl pivalate (2ad)**

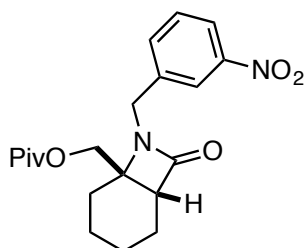

Prepared according to general procedure A using (1-((3-nitrobenzyl)amino)cyclohexyl)methyl pivalate (104.5 mg, 0.3 mmol),  $\text{Pd}(\text{OAc})_2$  (9.3 mg, 0.03 mmol), Xantphos (17 mg, 0.03 mmol), 1,4-benzoquinone (65 mg, 0.6 mmol) and silver(I) acetate (150 mg, 0.9 mmol) in toluene (3 mL) at 80 °C for 18 hours. The crude product was purified by flash column chromatography (gradient elution: 100% P.E. to 35% EtOAc in P.E.) to afford the product as a pale yellow oil (52.1 mg, 46%). IR  $\nu_{\text{max}}/\text{cm}^{-1}$  (film): 2937, 2871, 1728, 1529, 1480, 1461, 1397, 1348, 1281, 1145, 1097, 1035.  $^1\text{H}$  NMR (400 MHz,  $\text{CDCl}_3$ )  $\delta$ : 8.18 – 8.13 (2 H, m), 7.73 (1 H, d,  $J = 7.8$  Hz), 7.52 (1 H, t,  $J = 7.3$  Hz), 4.40 (1 H, d,  $J = 15.5$  Hz), 4.34 (1 H, d,  $J = 15.1$  Hz), 4.21 (1 H, d,  $J = 11.9$  Hz), 3.96 (1 H, d,  $J = 11.9$  Hz), 3.10 (1 H, dd,  $J = 3.7, 6.7$  Hz), 1.95 – 1.88 (1 H, m), 1.72 – 1.43 (6 H, m), 1.30 – 1.22 (1 H, m), 1.14 (9 H, s).  $^{13}\text{C}$  NMR (101 MHz,  $\text{CDCl}_3$ )  $\delta$ : 178.0, 170.4, 148.5, 139.2, 134.5, 130.0, 123.0, 122.9, 66.1, 60.2, 50.1, 43.2, 39.0, 27.2, 25.2, 19.6, 18.7, 17.2.  $m/z$  HRMS found  $[\text{M} + \text{H}]^+$  375.1916,  $\text{C}_{20}\text{H}_{27}\text{N}_2\text{O}_5$  requires 375.1914

## Functionalization of $\beta$ -lactam products

### *cis*-1-allyl-6-(((triisopropylsilyl)oxy)methyl)-7-methyl-7-azabicyclo[4.2.0]octan-8-one (4a)

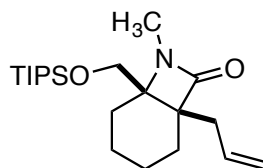

To a pre-cooled solution of *cis*-7-methyl-6-(((triisopropylsilyl)oxy)methyl)-7-azabicyclo[4.2.0]octan-8-one (97.6 mg, 0.3 mmol) in anhydrous THF (3 mL) was added a solution of freshly prepared LiHMDS (0.61 M, 0.75 mmol, 1.23 mL) dropwise at  $-78\text{ }^{\circ}\text{C}$  (dry ice/acetone bath) under  $\text{N}_2$ . The solution was stirred at  $-78\text{ }^{\circ}\text{C}$  for 2 hours and allyl bromide (104  $\mu\text{L}$ , 1.2 mmol) was added in one portion. The solution was warmed to room temperature over 16 hours and was quenched with saturated aqueous  $\text{NH}_4\text{Cl}$  (3 mL). The organic layer was separated and the aqueous was extracted with diethyl ether (3 x 10 mL). The organics were combined, washed with brine, dried ( $\text{Na}_2\text{SO}_4$ ) and the solvent removed *in vacuo*. The crude oil was purified by flash column chromatography (gradient elution: 5% EtOAc in P.E. to 25% EtOAc in P.E.) to afford the product as a colourless oil (86.8 mg, 79%). IR  $\nu_{\text{max}}/\text{cm}^{-1}$  (film): 2942, 2866, 1744, 1640, 1463, 1417, 1383, 1100, 1060.  $^1\text{H}$  NMR (400 MHz,  $\text{CDCl}_3$ )  $\delta$ : 5.91 – 5.83 (1 H, m), 5.06 – 5.02 (2 H, m), 3.95 (1 H, d,  $J = 9.9\text{ Hz}$ ), 3.83 (1 H, d,  $J = 9.9\text{ Hz}$ ), 2.78 (3 H, s), 2.49 (1 H, app. dd,  $J = 6.6, 14.5\text{ Hz}$ ), 2.32 (1 H, app. dd,  $J = 7.8, 14.5\text{ Hz}$ ), 2.03 (1 H, app. dd, 5.9, 12.4 Hz), 1.70 (1 H, dt,  $J = 3.4, 12.7\text{ Hz}$ ), 1.65 – 1.39 (6 H, m), 1.09 – 1.05 (21 H, m).  $^{13}\text{C}$  NMR (101 MHz,  $\text{CDCl}_3$ )  $\delta$ : 172.6, 134.5, 117.7, 67.3, 64.3, 57.7, 35.5, 26.0, 25.6, 23.4, 18.1, 17.8, 16.3, 12.0.  $m/z$  HRMS found  $[\text{M} + \text{H}]^+$  366.2824,  $\text{C}_{21}\text{H}_{40}\text{NO}_2\text{Si}$  requires 366.2823.

### *cis*-7-methyl-7-azabicyclo[4.2.0]octan-6-yl)methanol (4b)

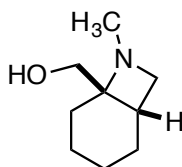

To a solution of  $\text{AlCl}_3$  (120 mg, 0.9 mmol) in anhydrous  $\text{Et}_2\text{O}$  (2 mL) was added  $\text{LiAlH}_4$  (34 mg, 0.9 mmol) carefully at  $0\text{ }^{\circ}\text{C}$  under  $\text{N}_2$ . The reaction mixture was stirred at  $0\text{ }^{\circ}\text{C}$  for 10 min and subsequently refluxed for 30 min. ( $\pm$ )-*cis*-7-methyl-6-(((triisopropylsilyl)oxy)methyl)-7-azabicyclo[4.2.0]octan-8-one (97.6 mg, 0.3 mmol) in anhydrous  $\text{Et}_2\text{O}$  (2 mL) was added dropwise and refluxed for 4 h. The reaction was cooled to room temperature and quenched with 10%  $\text{NaOH}$  (1 mL).

The aqueous was extracted with Et<sub>2</sub>O (3 x 50 mL), dried over Na<sub>2</sub>SO<sub>4</sub> and the solvent removed *in vacuo* (*Volatile!*) to obtain the title compound as a colorless oil (41.9 mg, 90%). IR  $\nu_{\text{max}}/\text{cm}^{-1}$  (film): 3366 (br), 2926, 2855, 1481, 1450, 1374, 1339, 1274, 1186, 1158, 1120, 1087, 1063. <sup>1</sup>H NMR (400 MHz, CDCl<sub>3</sub>)  $\delta$ : 3.33 (1 H, d,  $J$  = 11.3 Hz), 3.21 (1 H, dd  $J$  = 5.8, 7.3 Hz), 3.09 (1 H, d,  $J$  = 11.3 Hz), 2.79 (1 H, dd  $J$  = 5.8, 9.7 Hz), 2.74 – 2.69 (1 H, m), 2.11 (3 H, s), 1.89 (1 H, td,  $J$  = 4.2, 13.6 Hz), 1.70 – 1.65 (1 H, m), 1.59 – 1.54 (1 H, m), 1.51 – 1.47 (1 H, m), 1.43 – 1.32 (2 H, m), 1.25 – 1.23 (1 H, m), 1.04 – 1.96 (1 H, m). <sup>13</sup>C NMR (101 MHz, CDCl<sub>3</sub>)  $\delta$ : 67.8, 64.1, 54.2, 48.3, 35.1, 29.9, 23.8, 23.7, 22.2, 21.4.  $m/z$  HRMS found  $[M + H]^+$  156.1382, C<sub>9</sub>H<sub>18</sub>NO requires 156.1383

**(*cis* -8-oxo-7-azabicyclo[4.2.0]octan-6-yl)methyl pivalate (4c)**

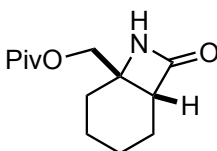

(*cis* -8-oxo-7-(2-(phenylsulfonyl)ethyl)-7-azabicyclo[4.2.0]octan-6-yl)methyl pivalate (123 mg, 0.3 mmol) was dissolved in THF (4.5 mL) and the solution cooled to -78 °C. Freshly prepared lithium *bis*(trimethylsilyl)amide (0.61 M in THF, 737  $\mu$ L, 0.45 mmol) was added drop-wise and the reaction stirred at -78 °C for 30 minutes, then allowed to warm to room temperature over 30 minutes. The reaction mixture was quenched with water (5 mL) and extracted with EtOAc (3 x 10 mL). The combined organic layers were washed with brine (10 mL), dried over MgSO<sub>4</sub> and concentrated *in vacuo*. Purification of the residue by flash column chromatography (35% EtOAc in P.E.) afforded the title compound as a white solid (57 mg, 79%).  $m.p$ : 96–98 °C; IR  $\nu_{\text{max}}/\text{cm}^{-1}$  (film): 3202 (br), 2937, 2865, 1740, 1719, 1479, 1451, 1395, 1312, 1286, 1157, 1082, 1039, 1017; <sup>1</sup>H NMR (400 MHz, CDCl<sub>3</sub>)  $\delta$ : 5.79 (1 H, br s, N-H), 4.32 (1 H, d,  $J$  = 11.6 Hz), 3.95 (1 H, d,  $J$  = 11.6 Hz), 3.09 – 2.97 (1 H, m), 1.96 – 1.85 (1 H, m), 1.80 – 1.63 (5 H, m), 1.60 – 1.44 (2 H, m), 1.21 (9 H, s); <sup>13</sup>C NMR (101 MHz, CDCl<sub>3</sub>)  $\delta$ : 178.5, 170.6, 67.9, 55.5, 50.1, 39.1, 27.8, 27.3, 20.0, 18.9, 17.5;  $m/z$  HRMS found  $[M + H]^+$  240.1595, C<sub>13</sub>H<sub>22</sub>NO<sub>3</sub> requires 240.1594.

## **NMR of Staring Amines**

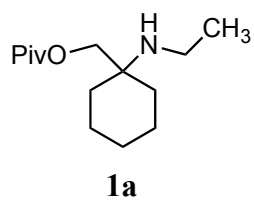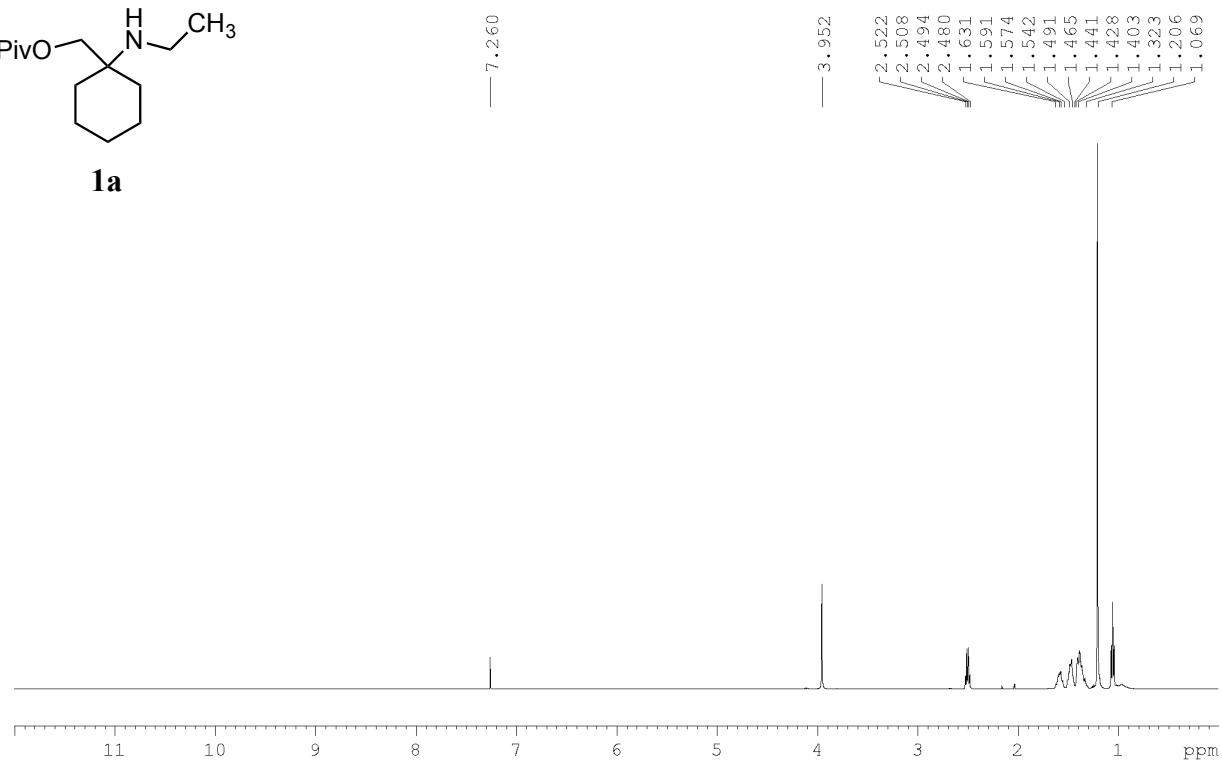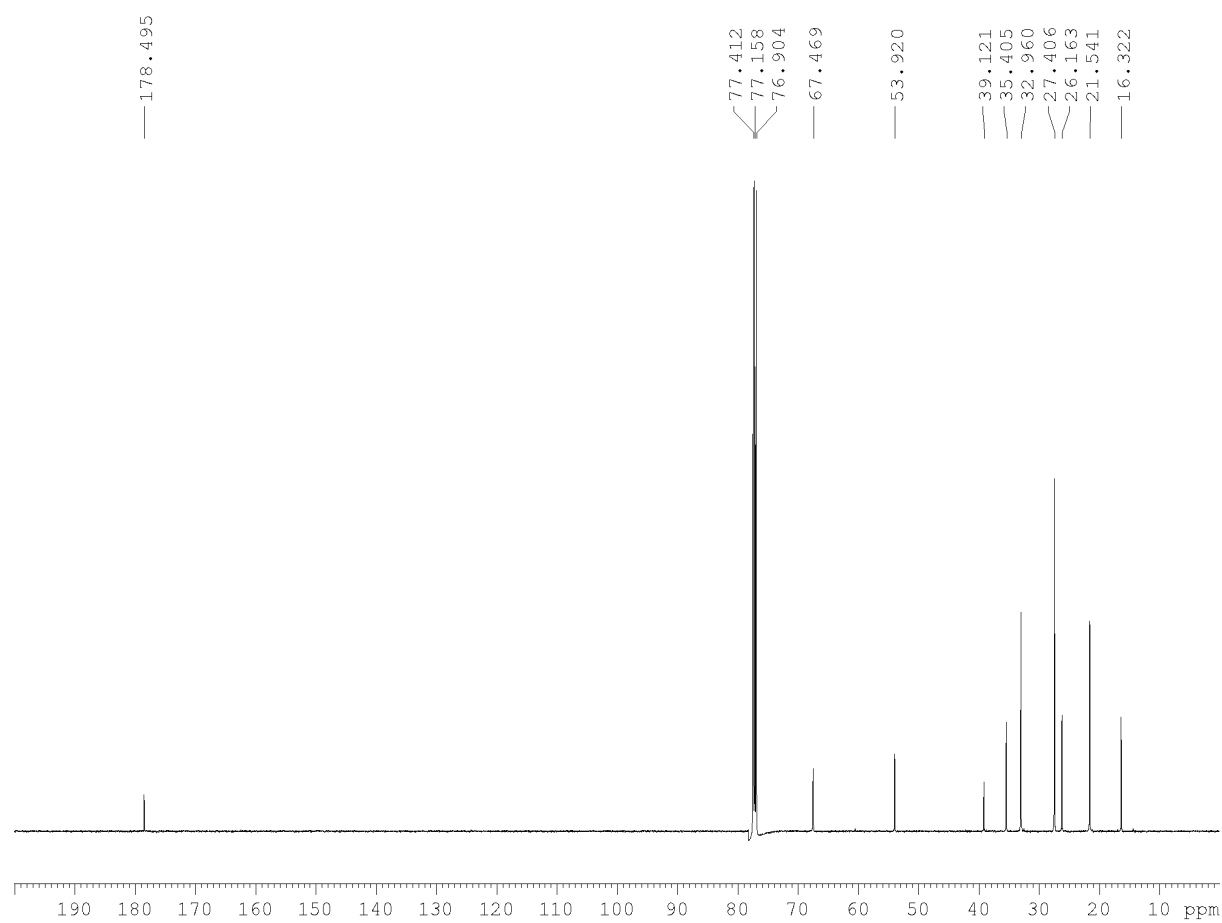

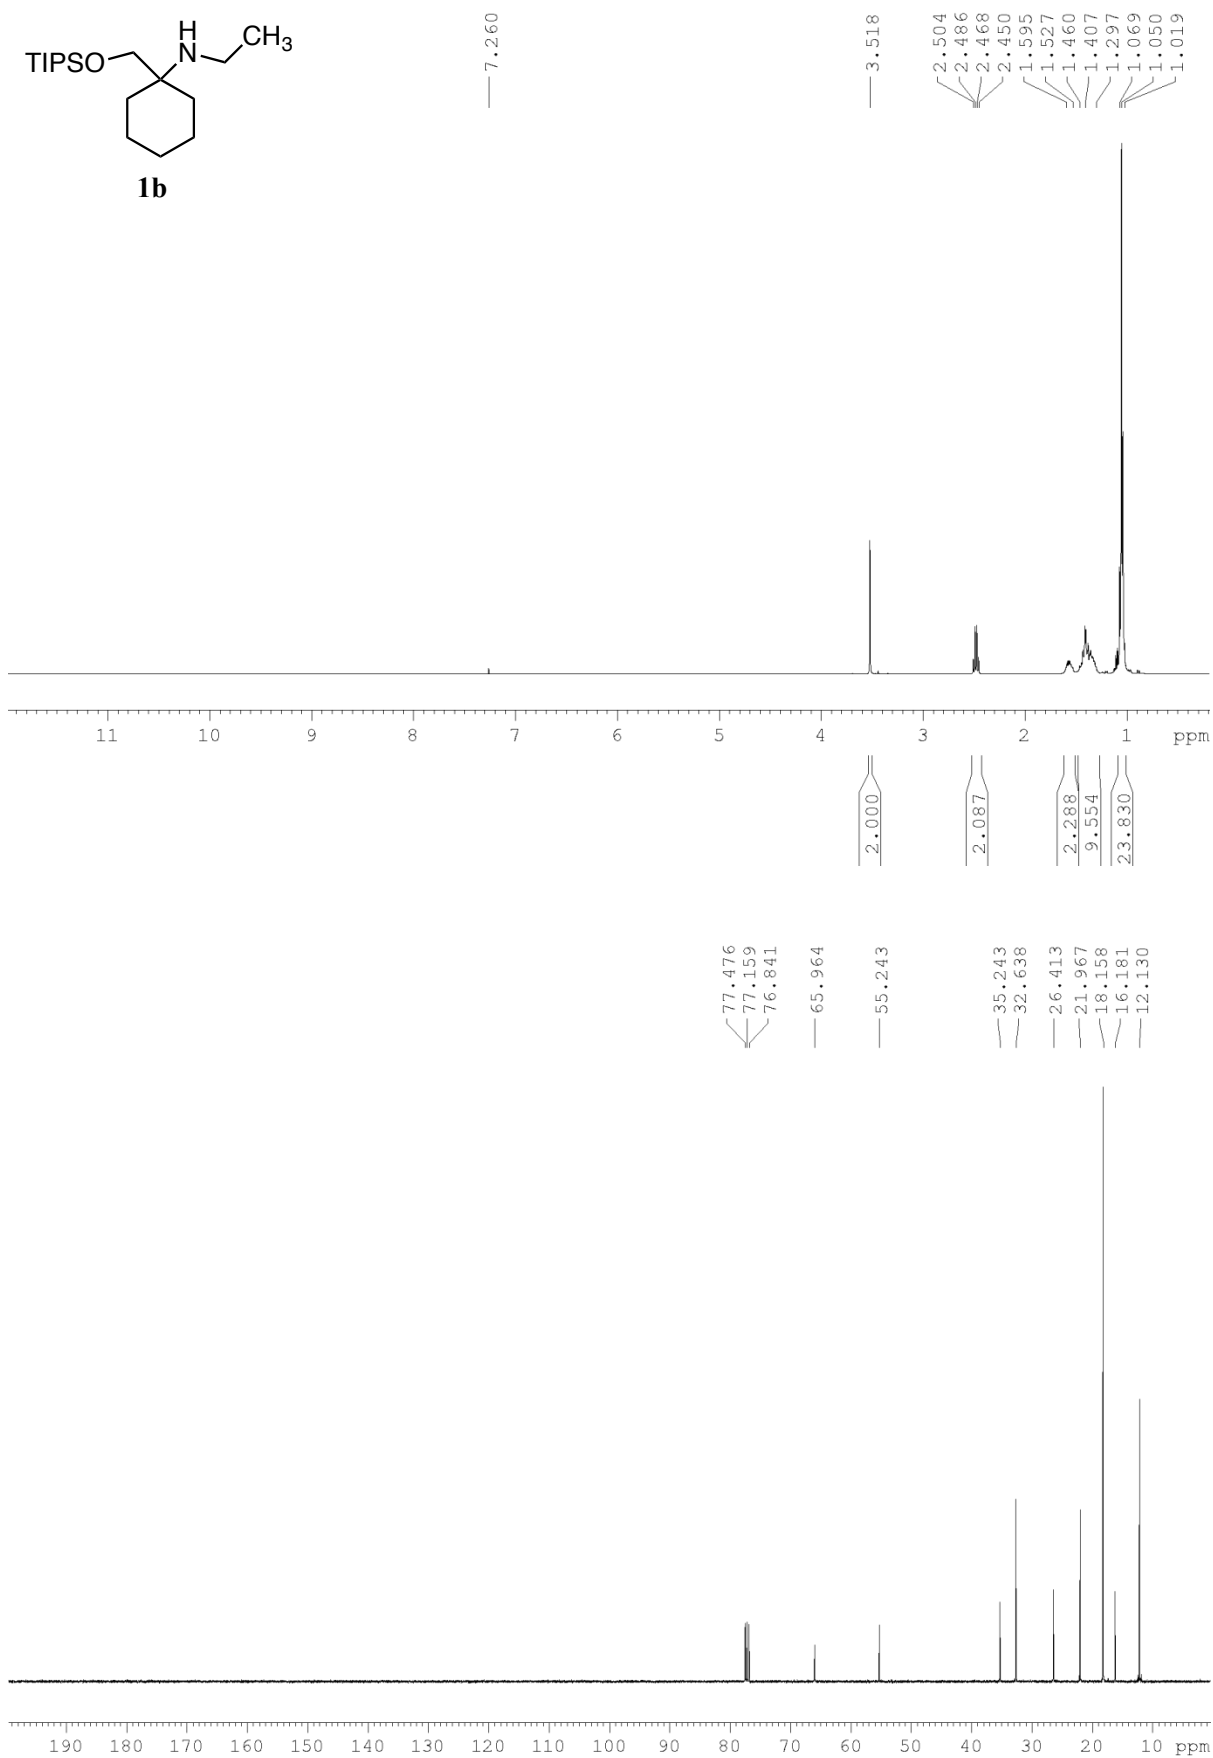

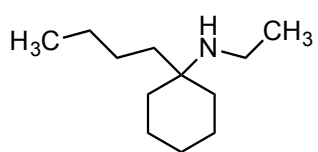

**1c**

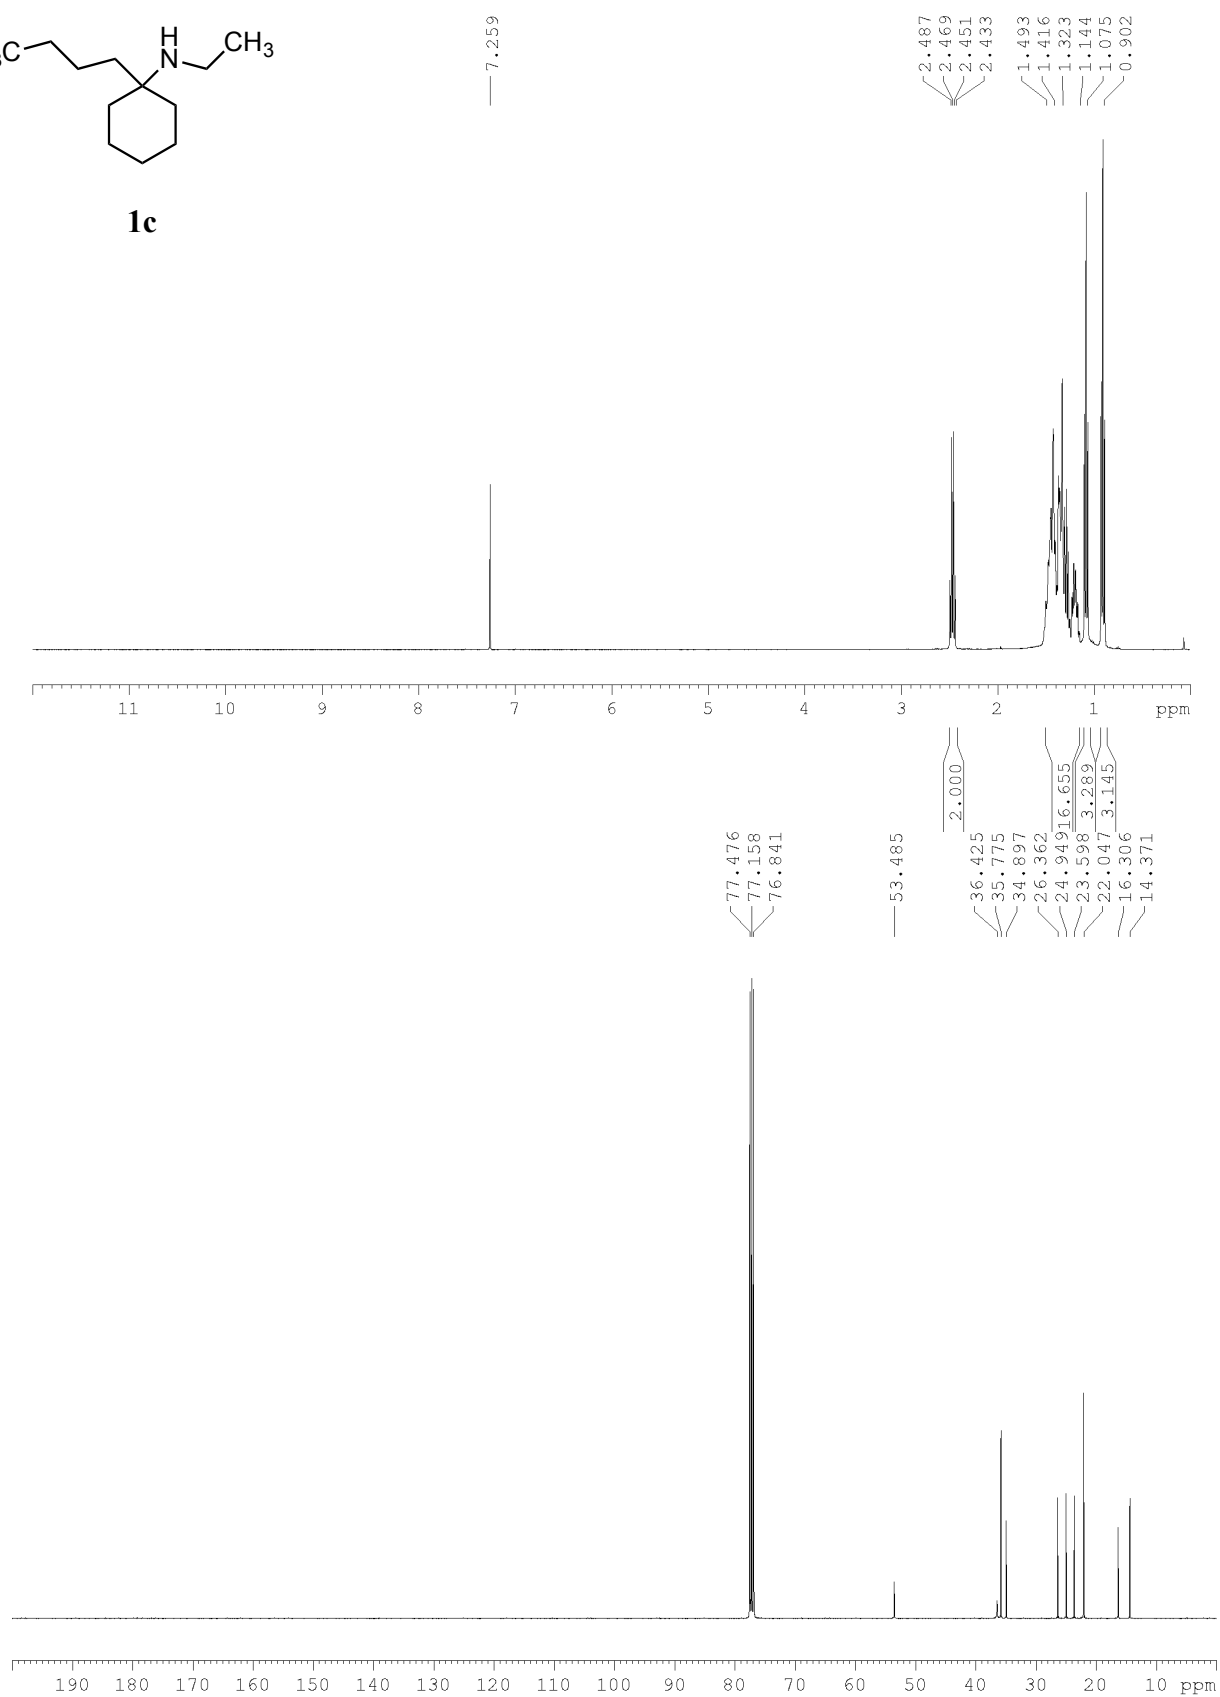

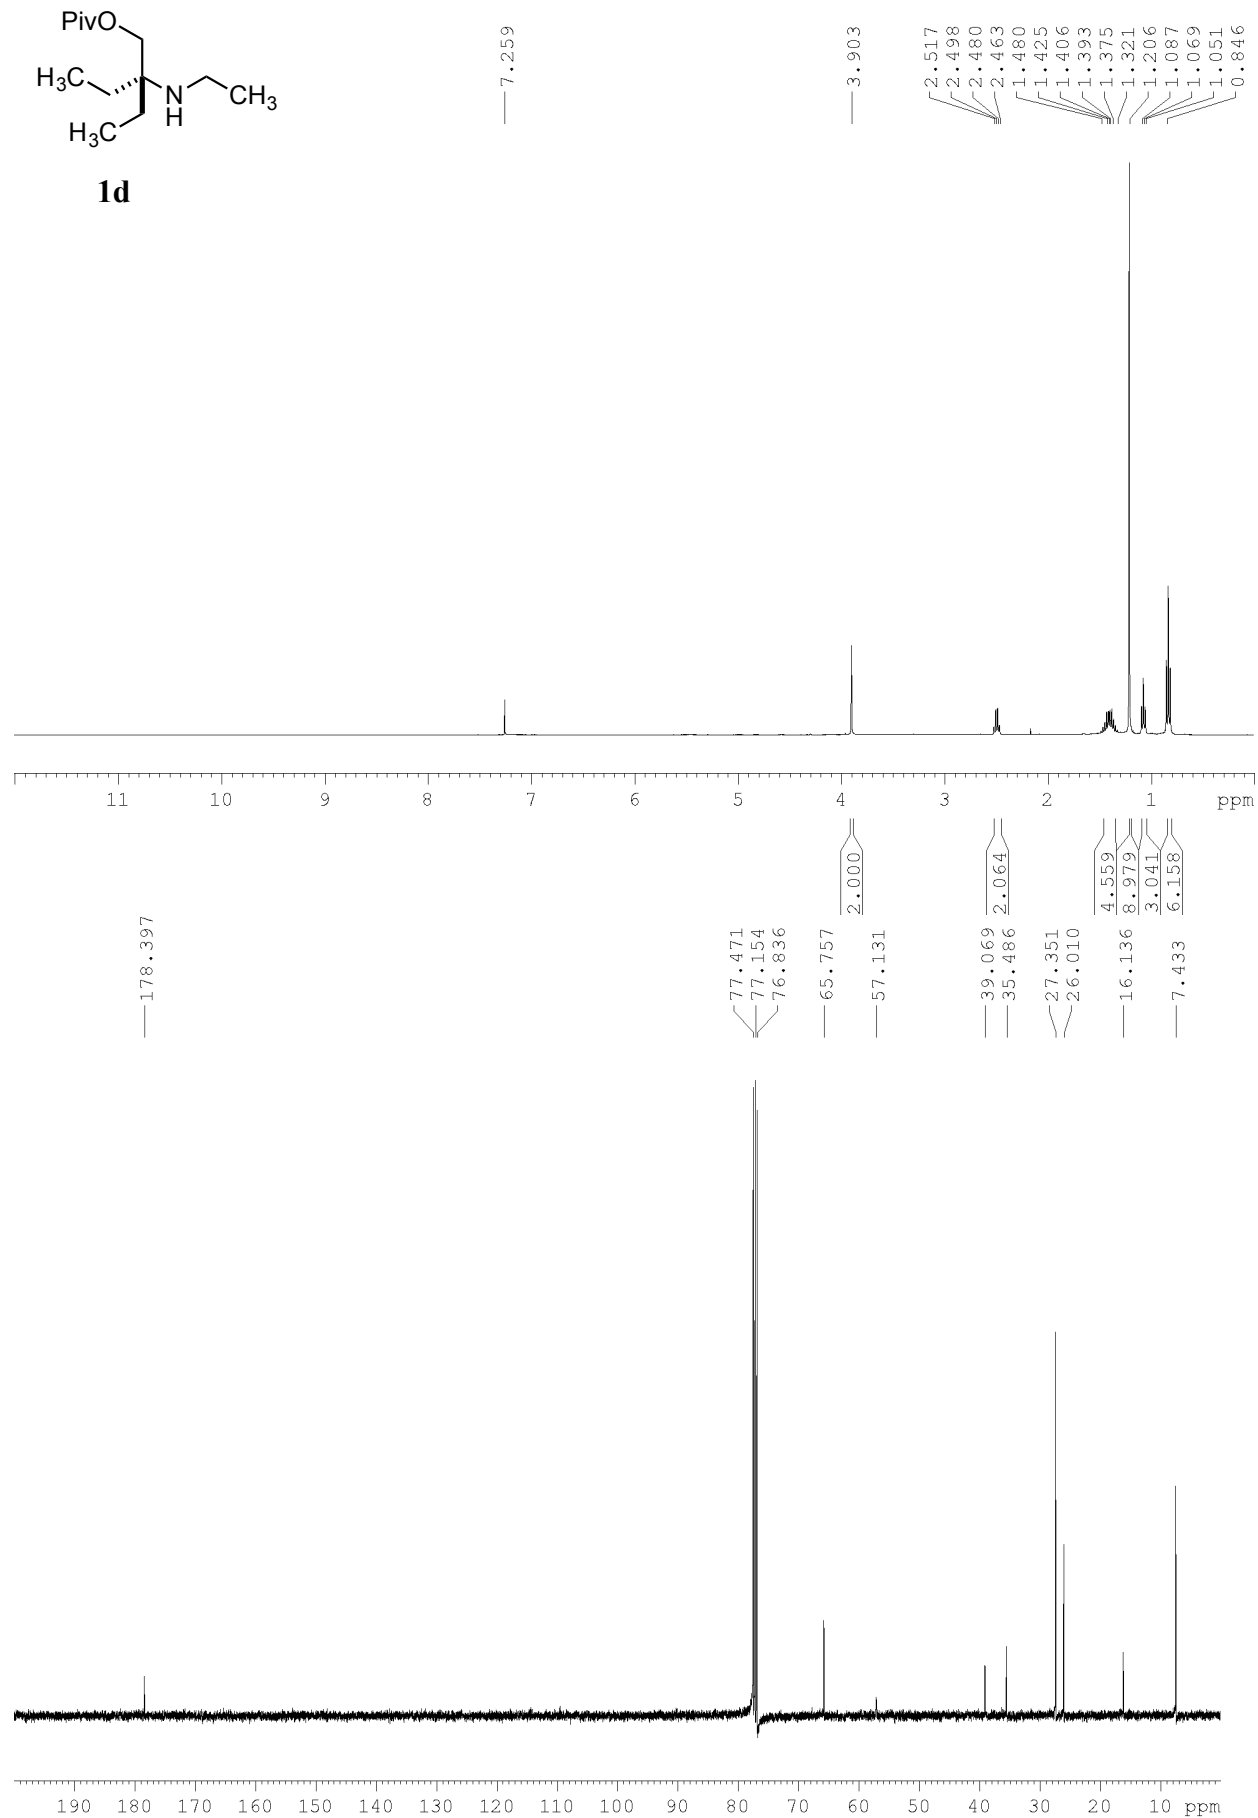

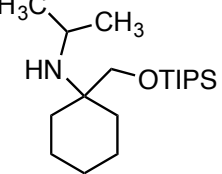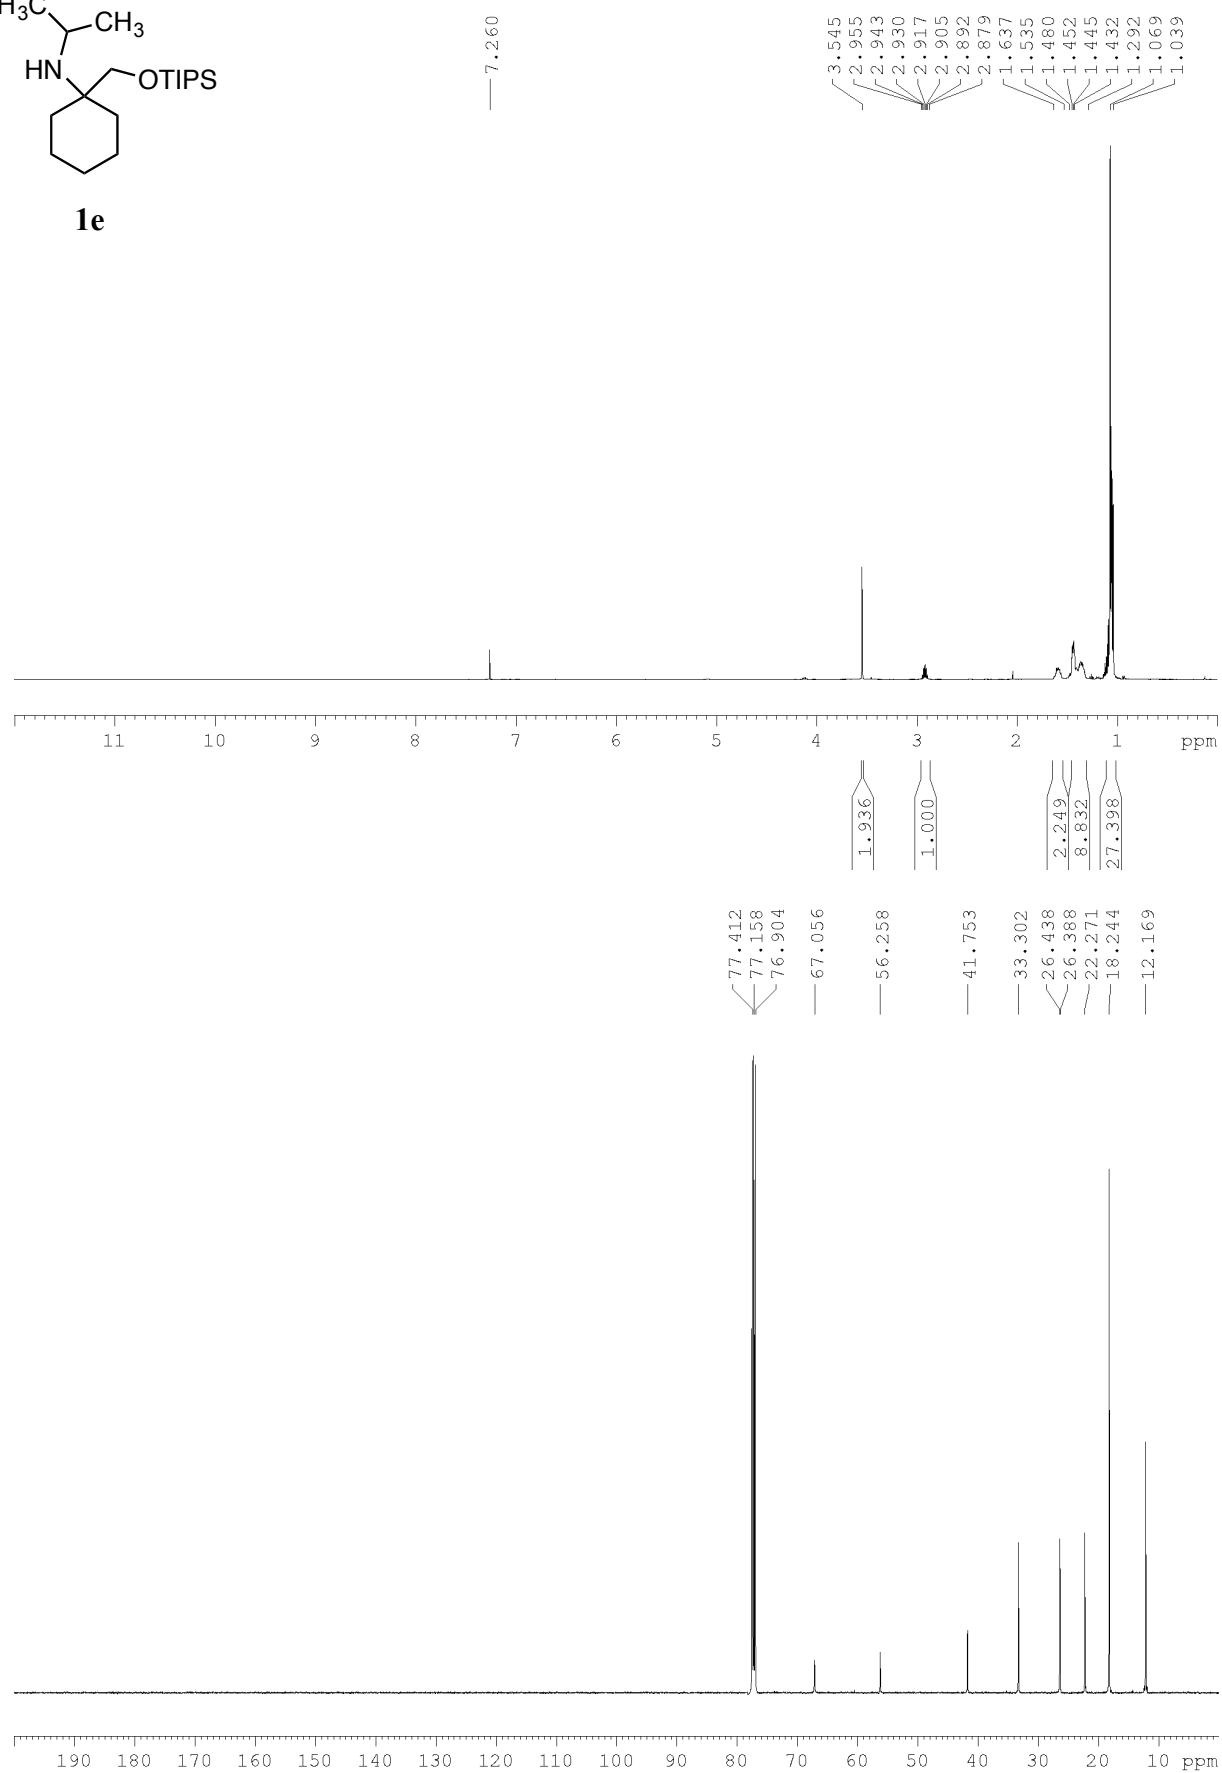

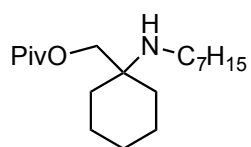

**1f**

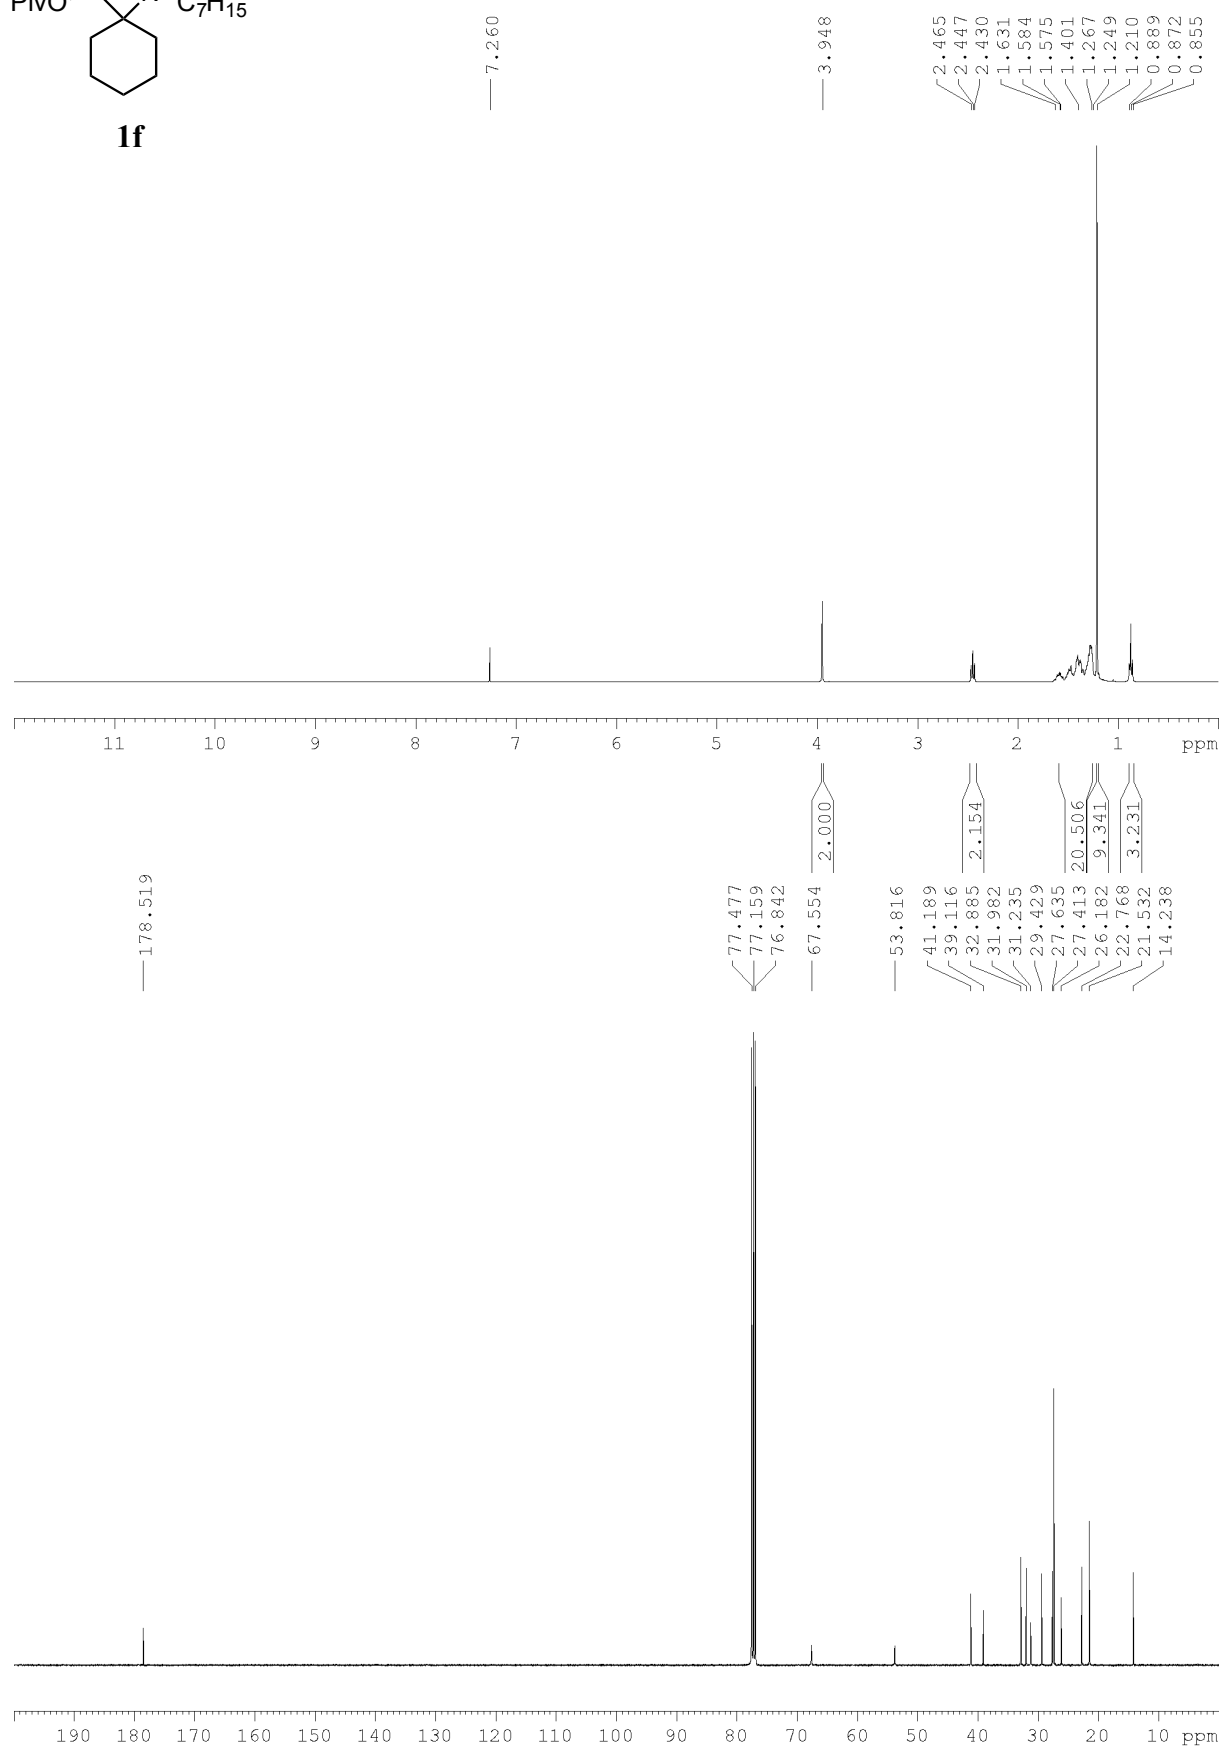

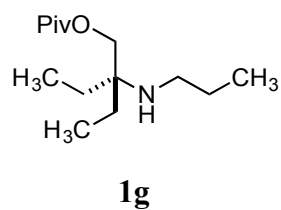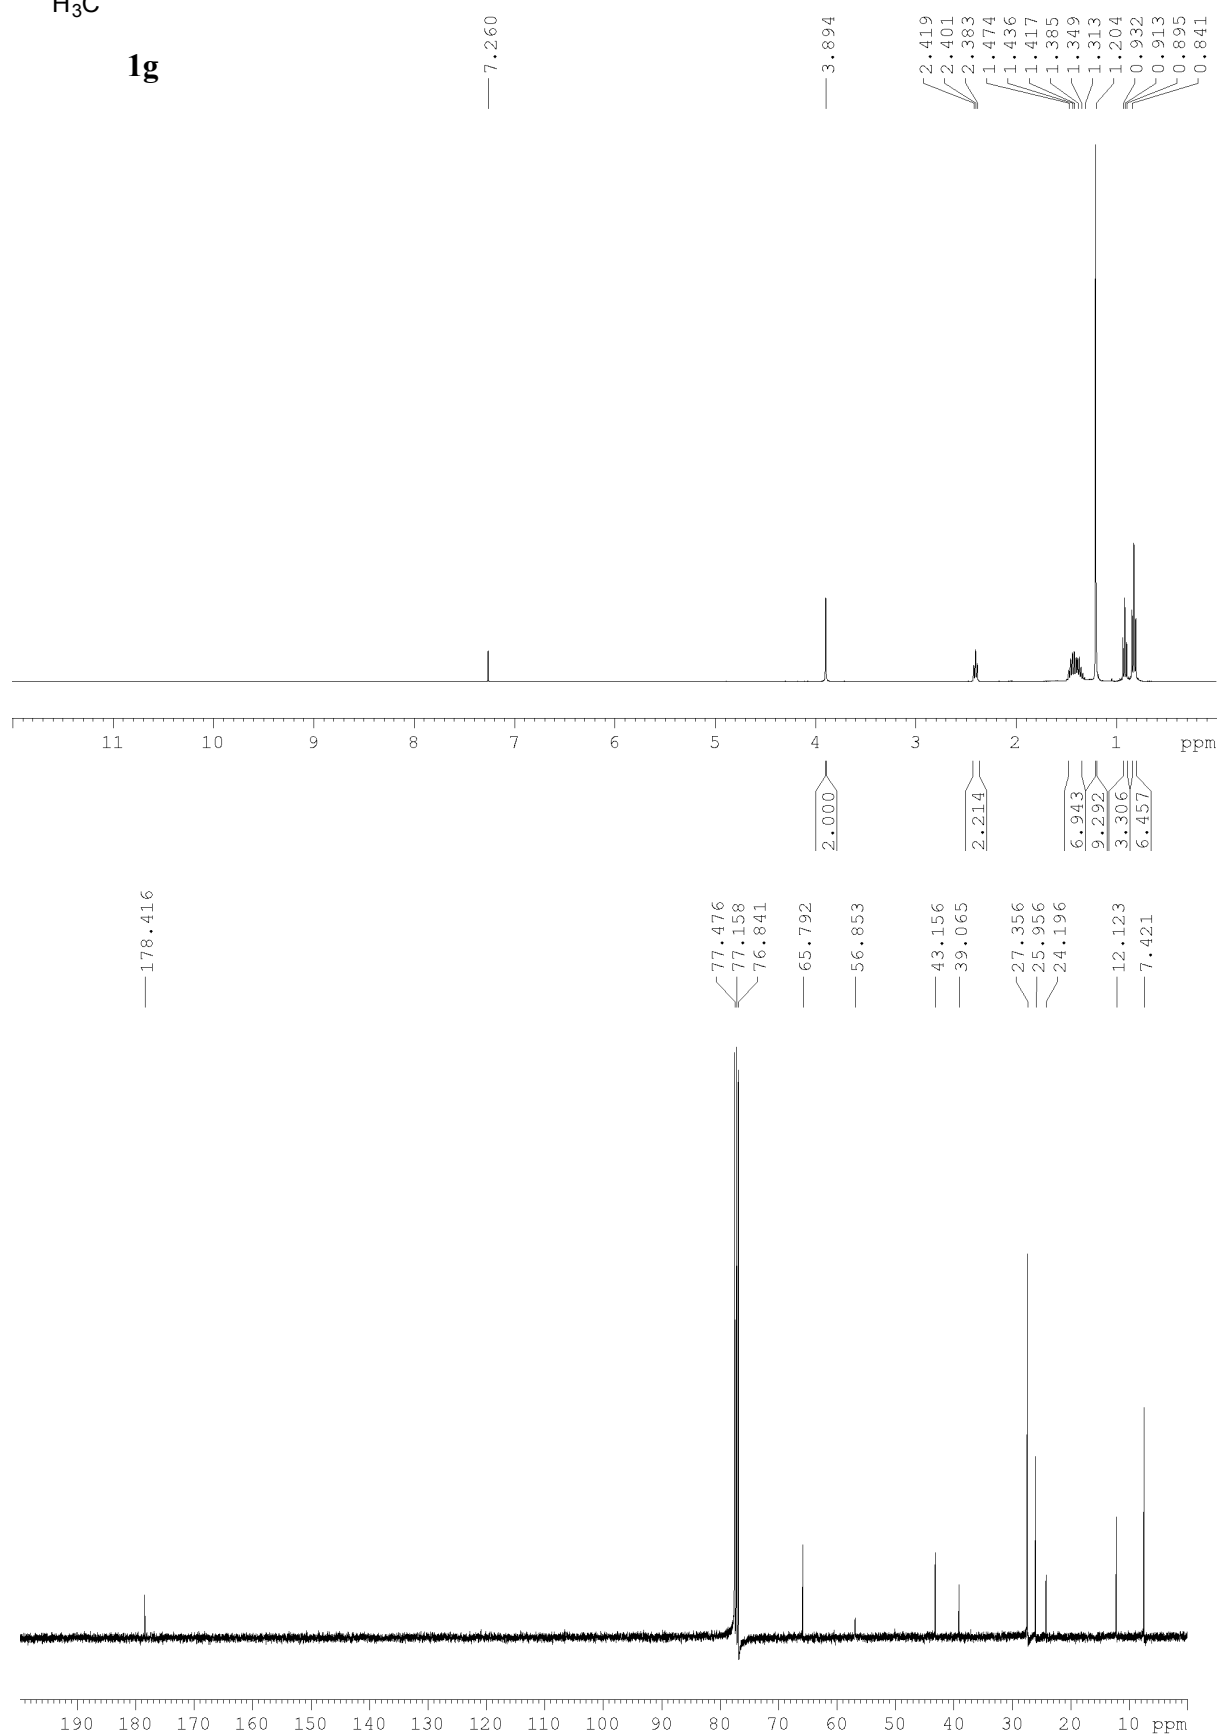

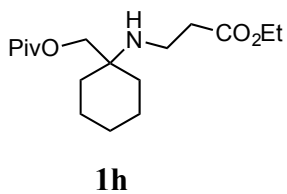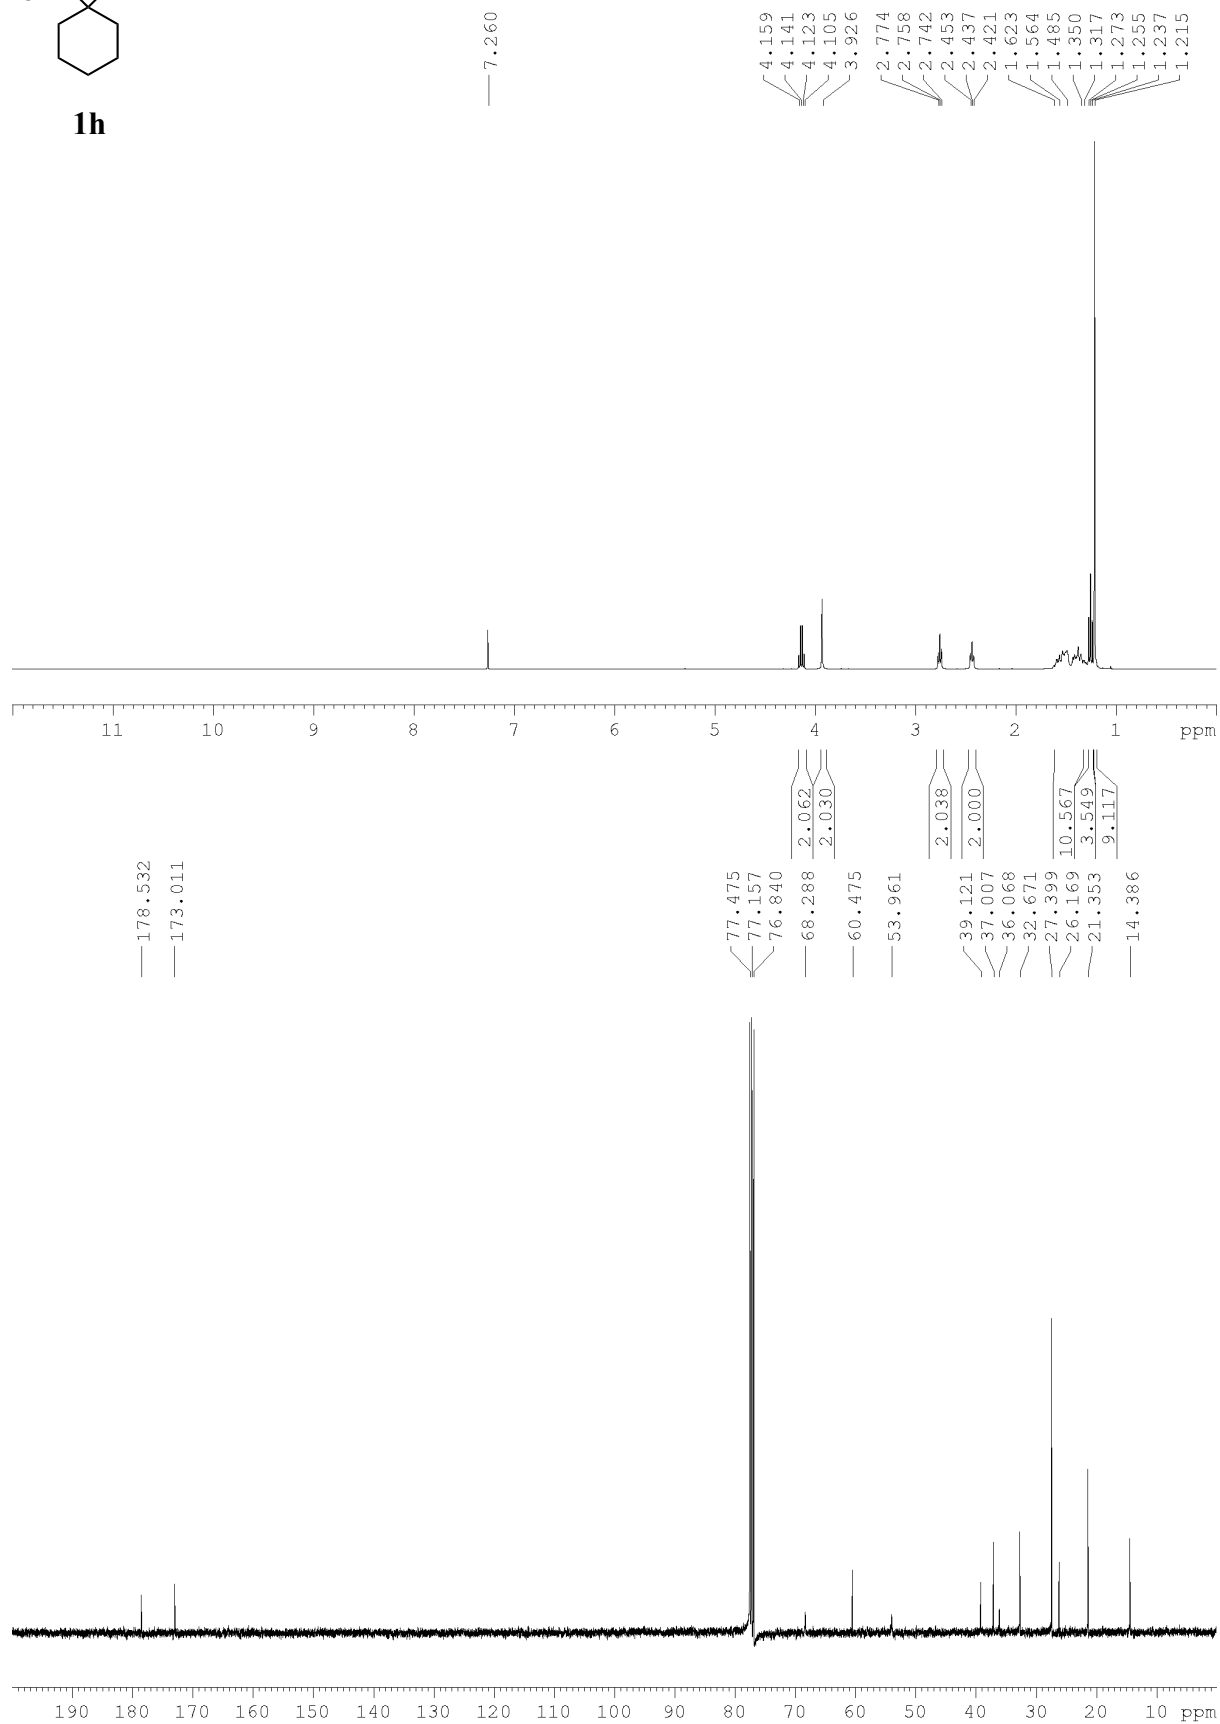

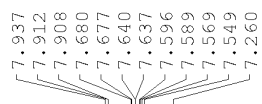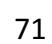

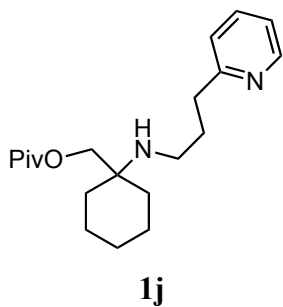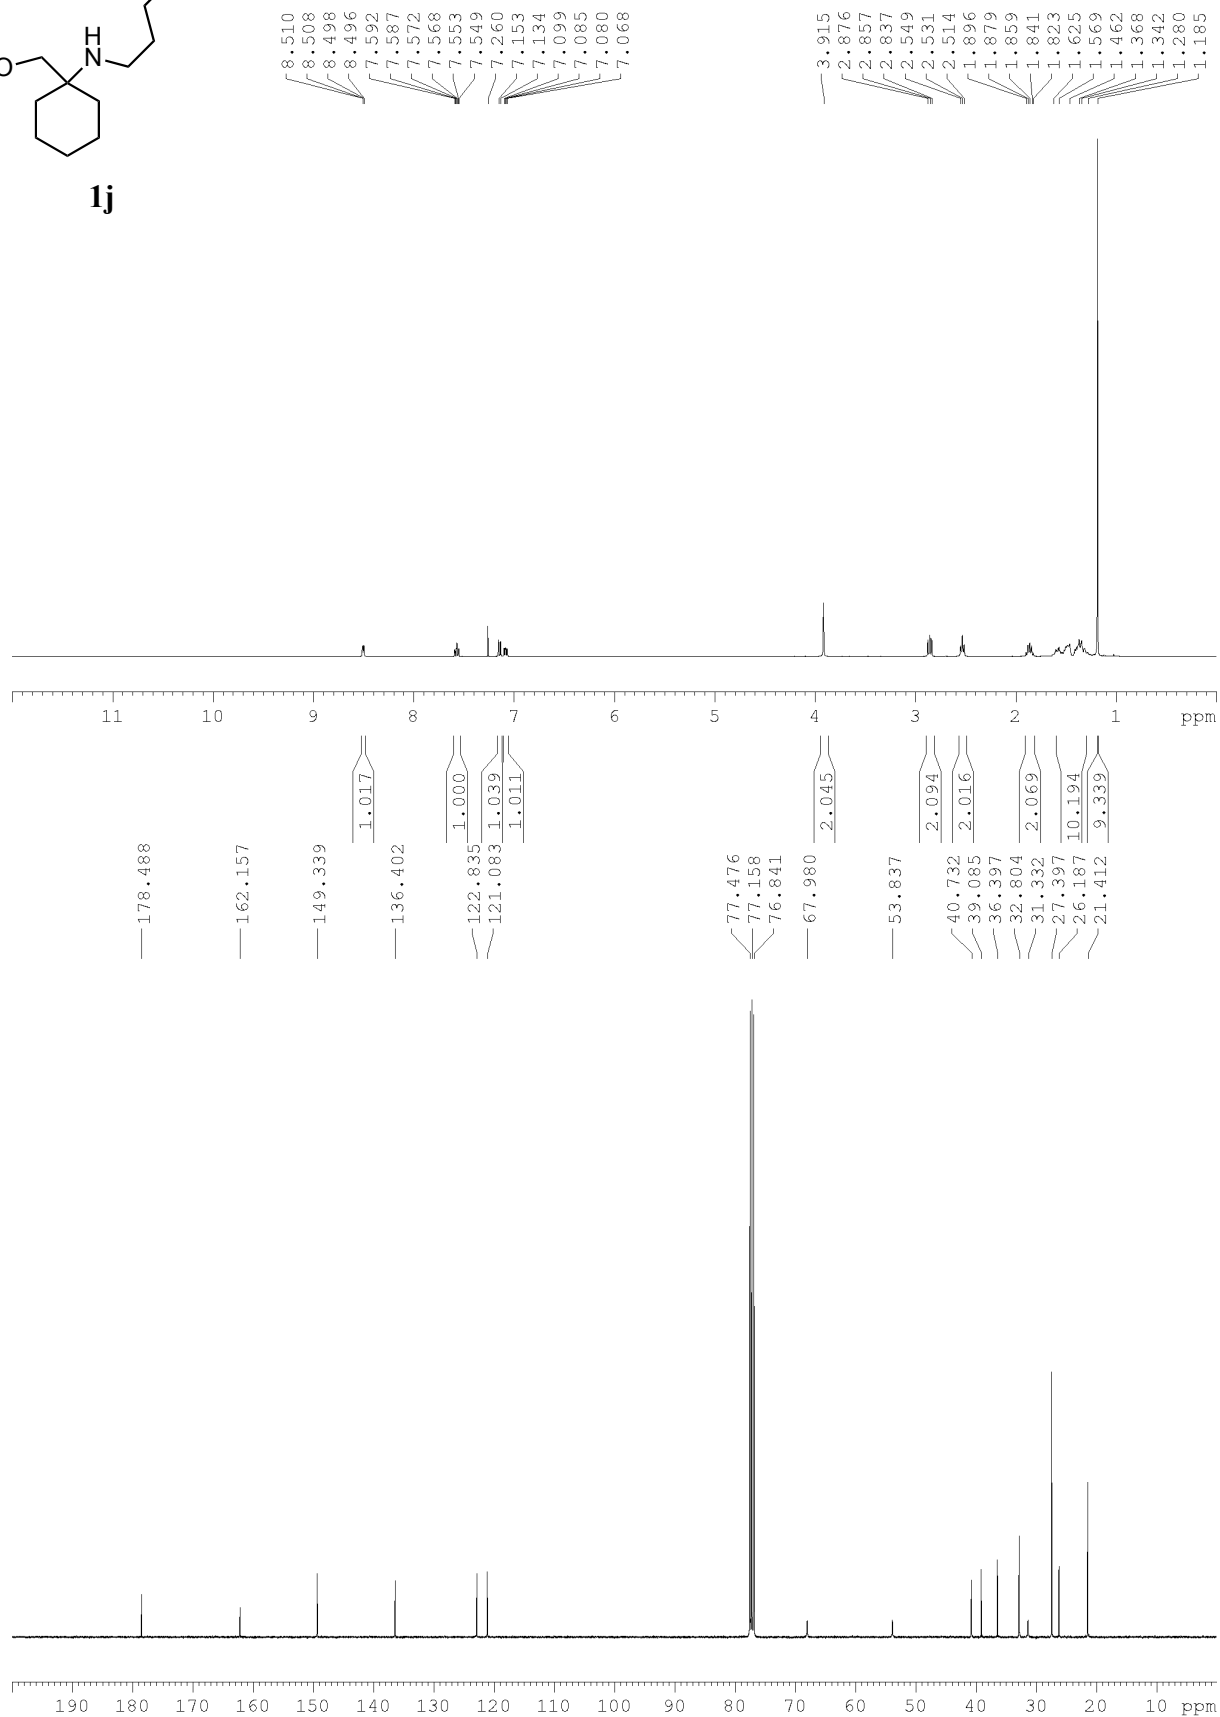

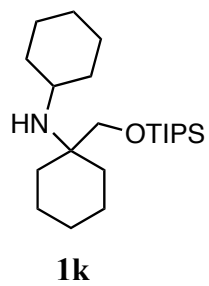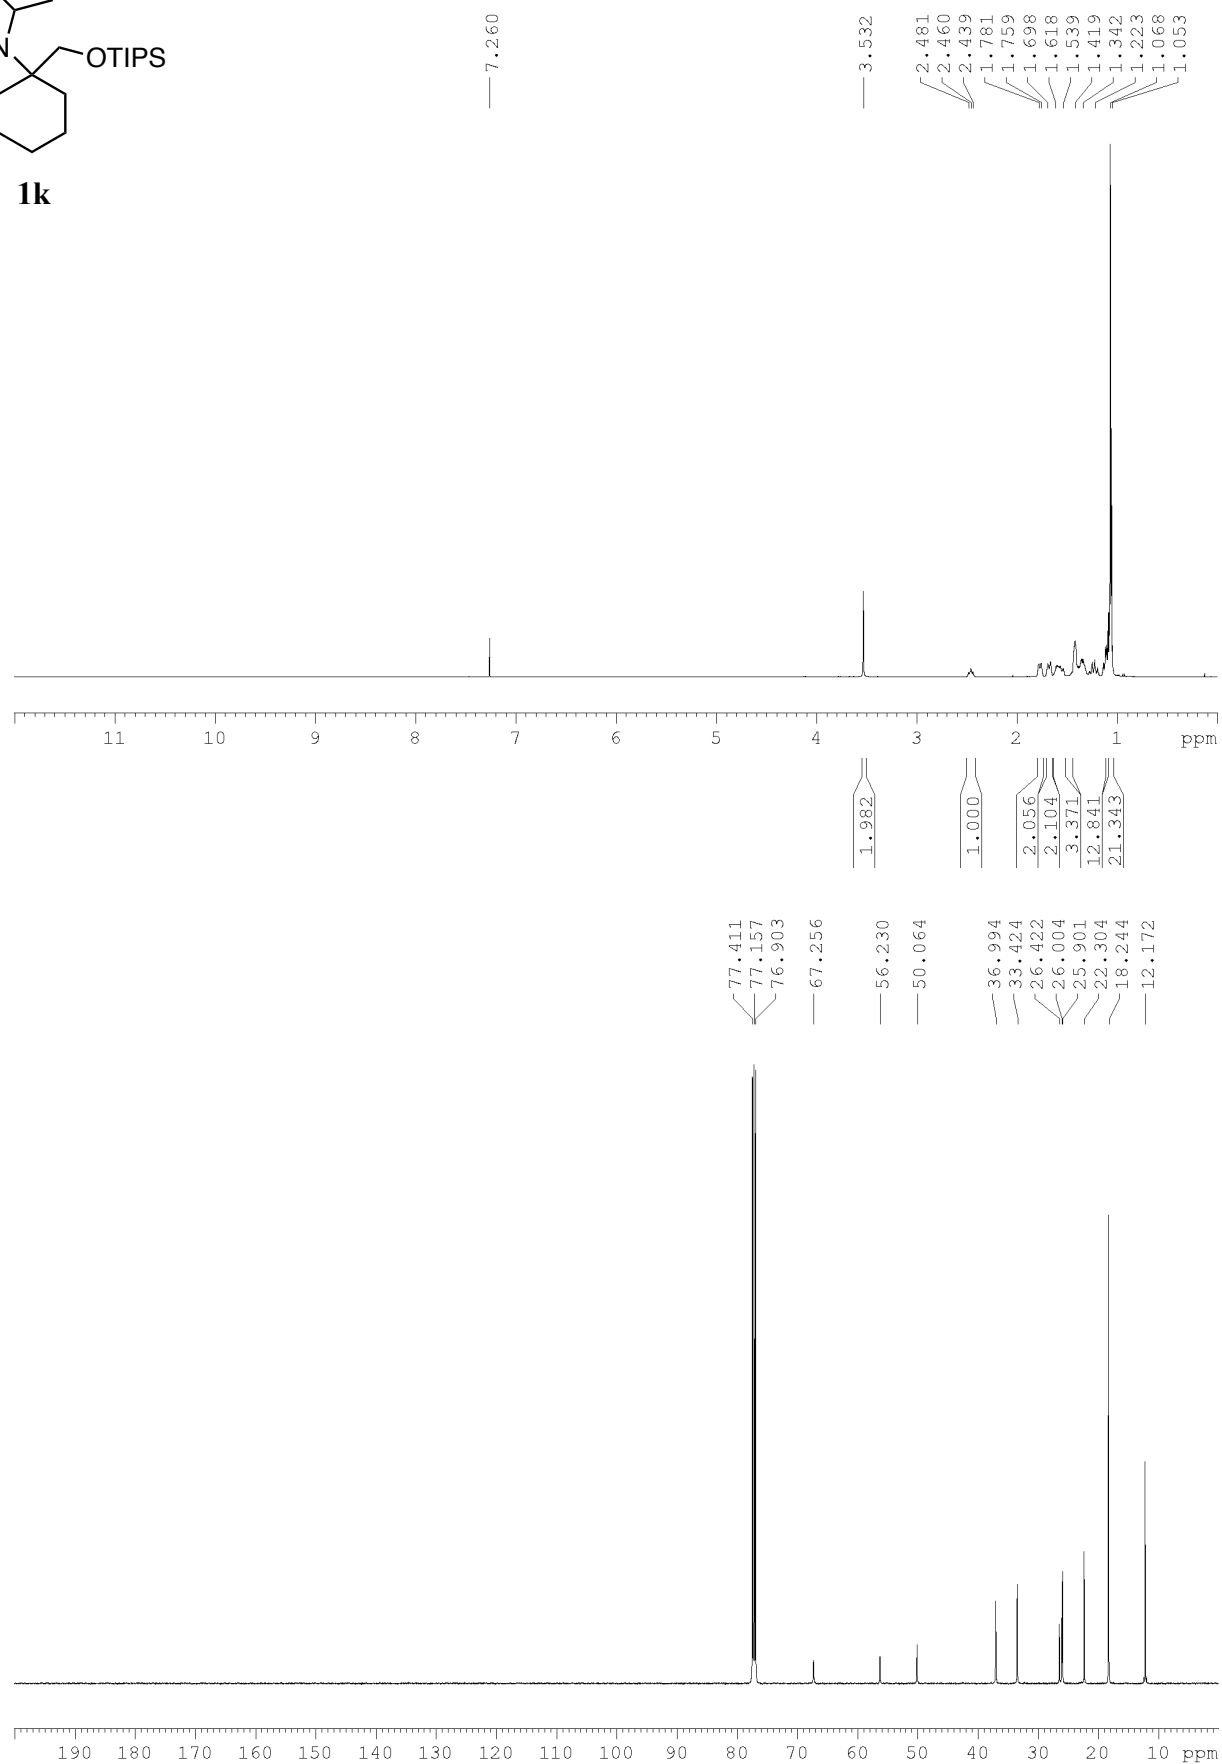

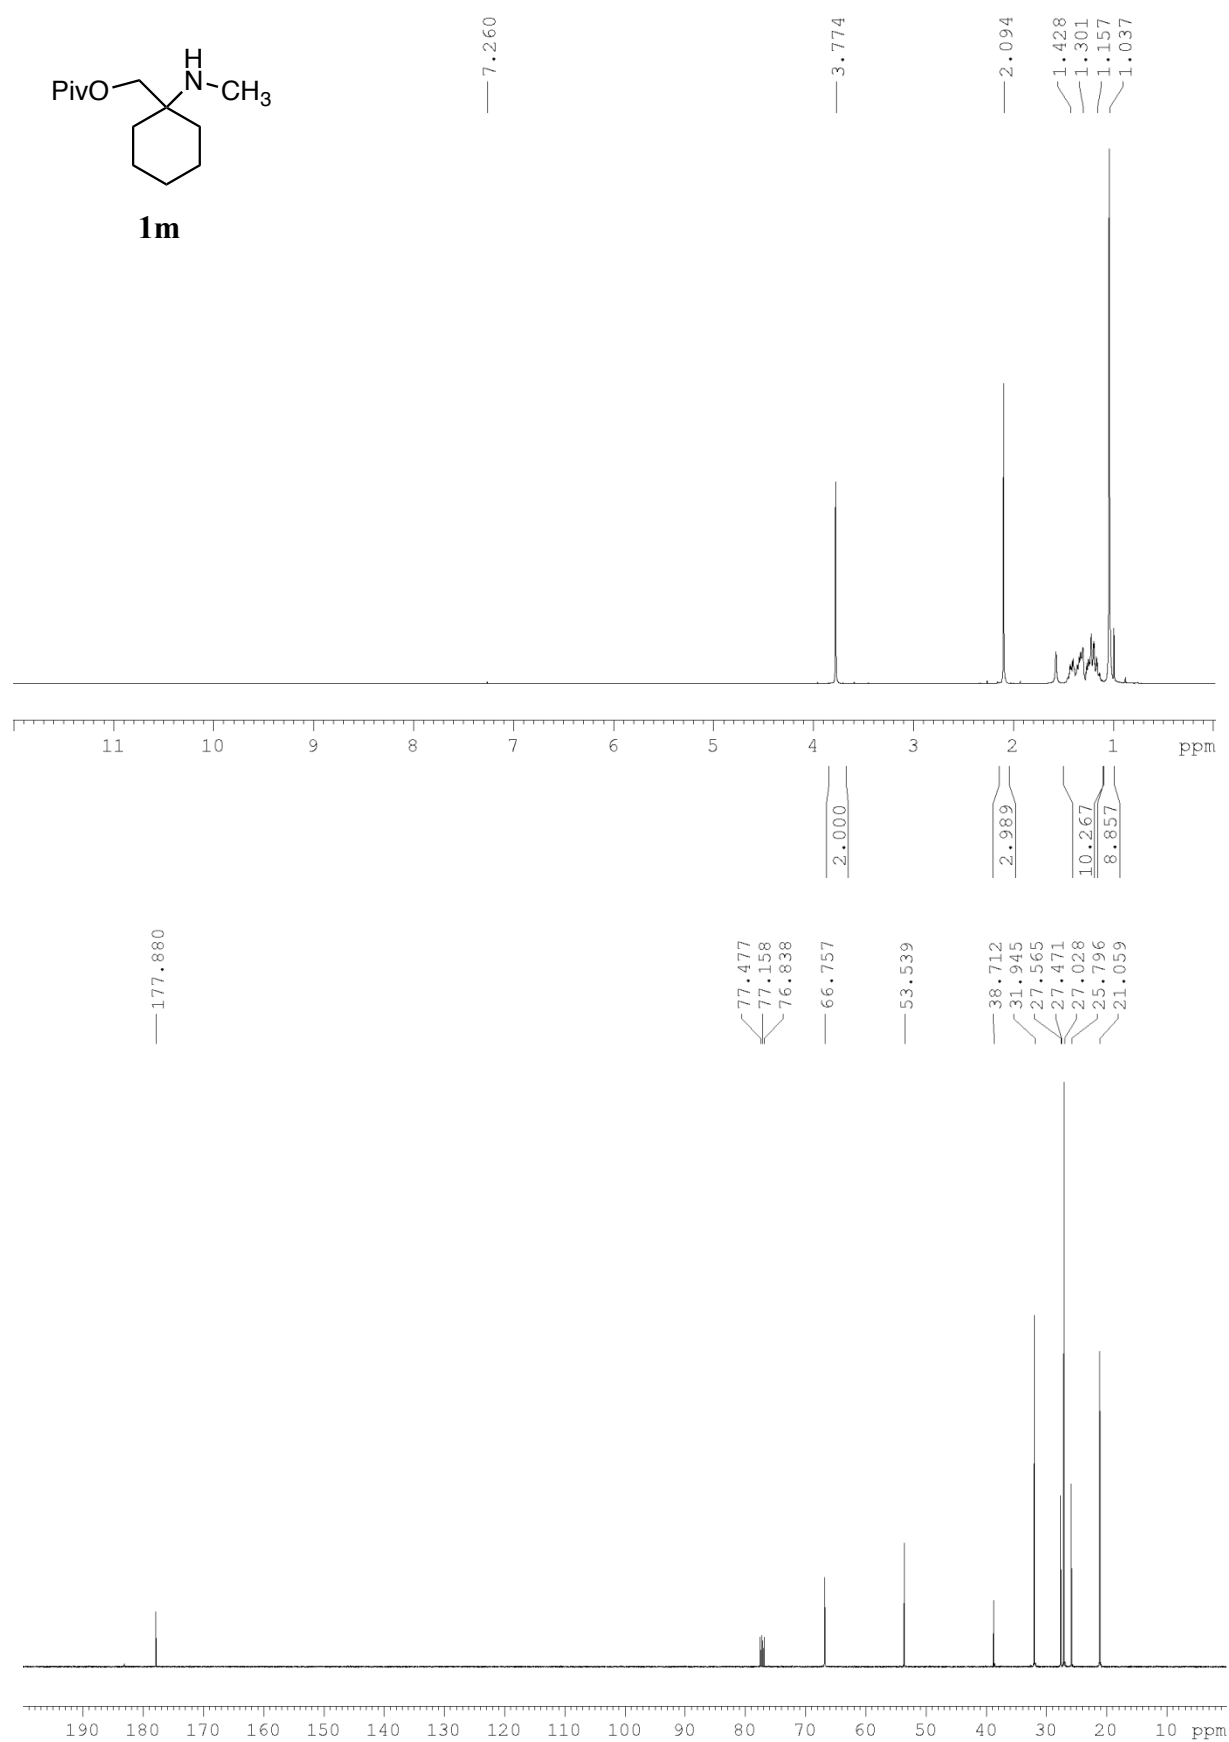

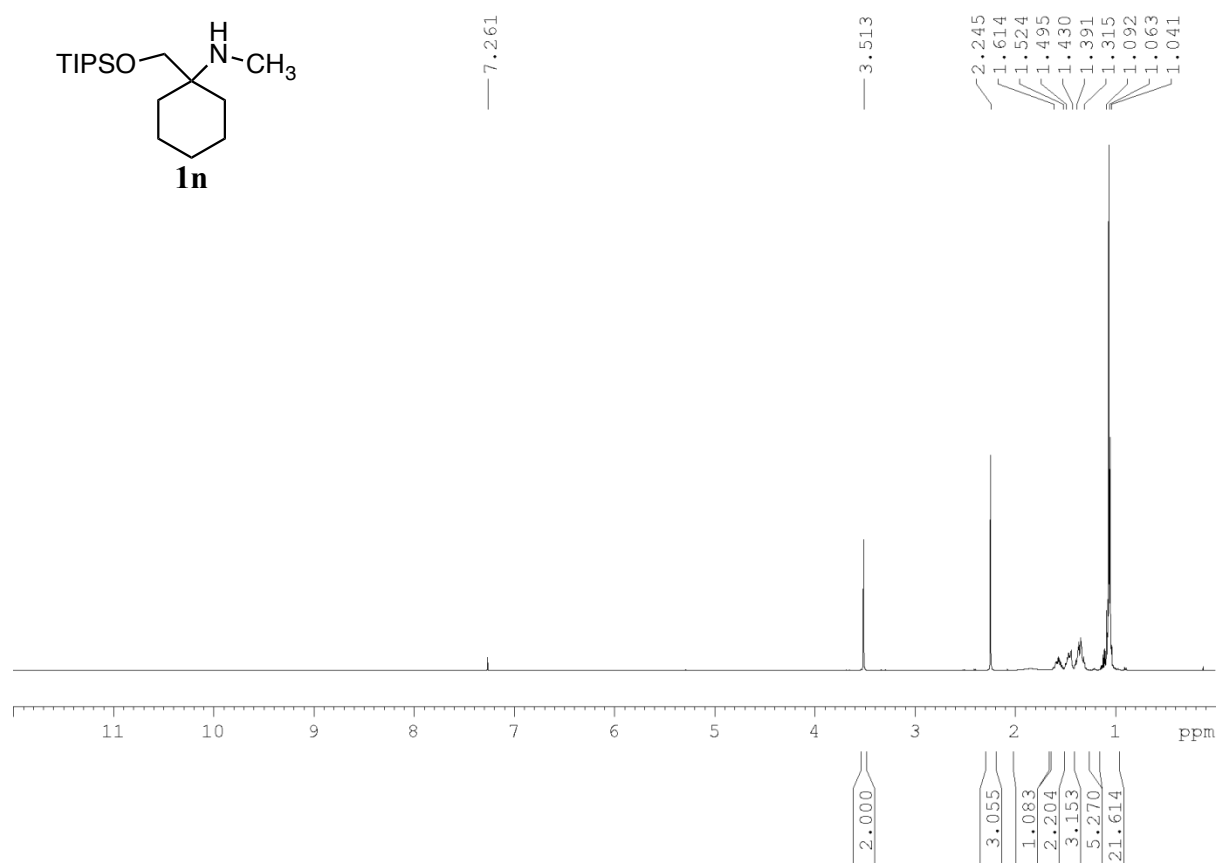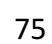

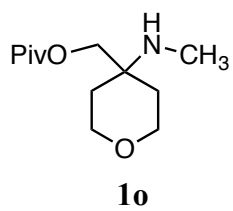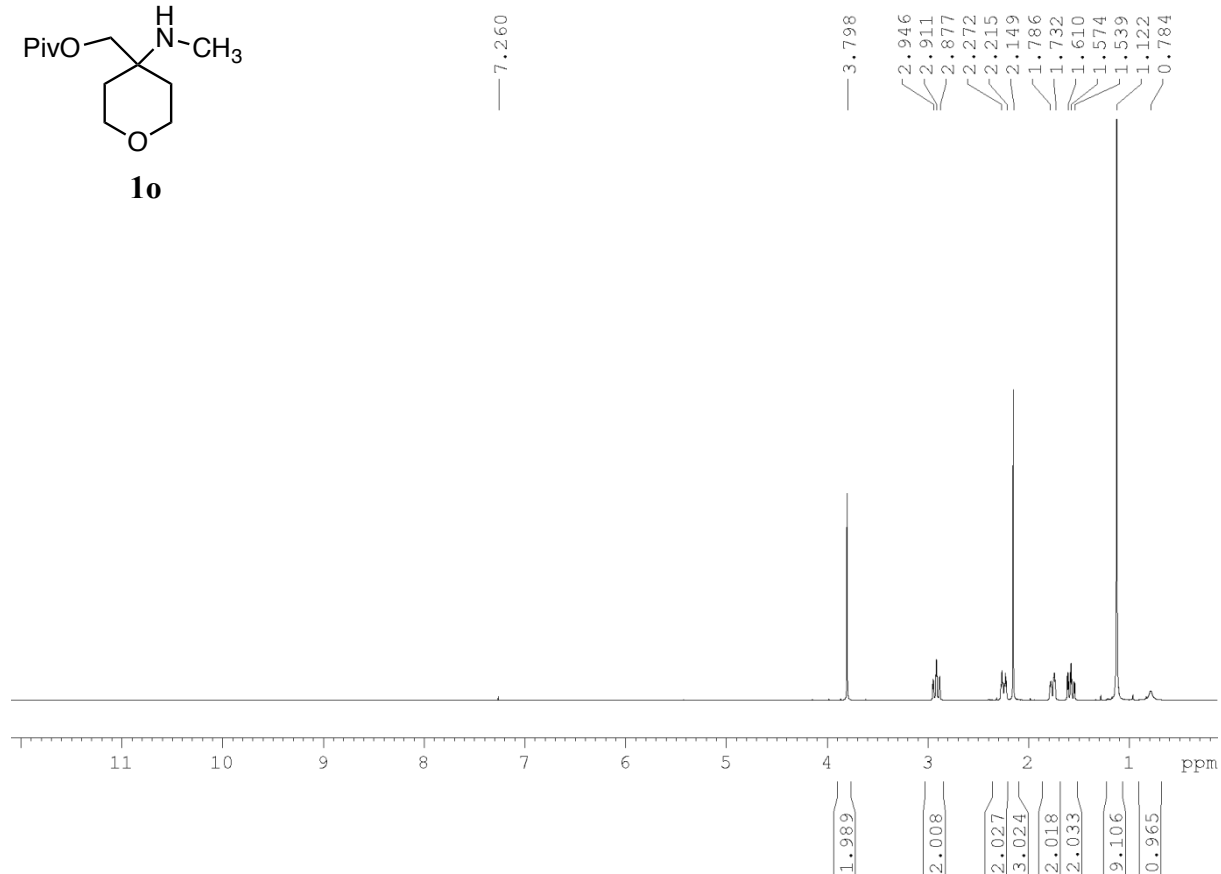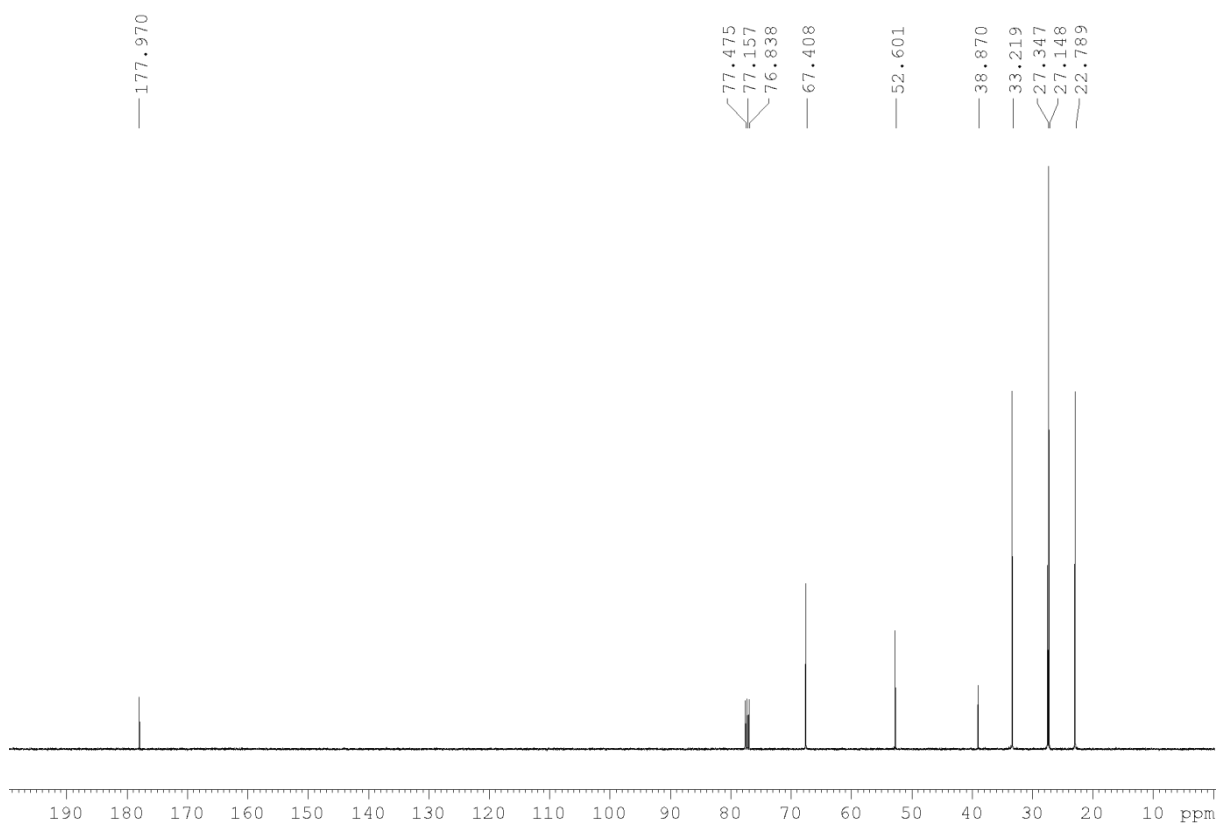

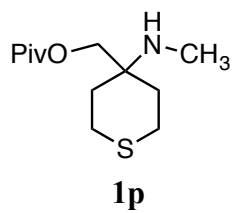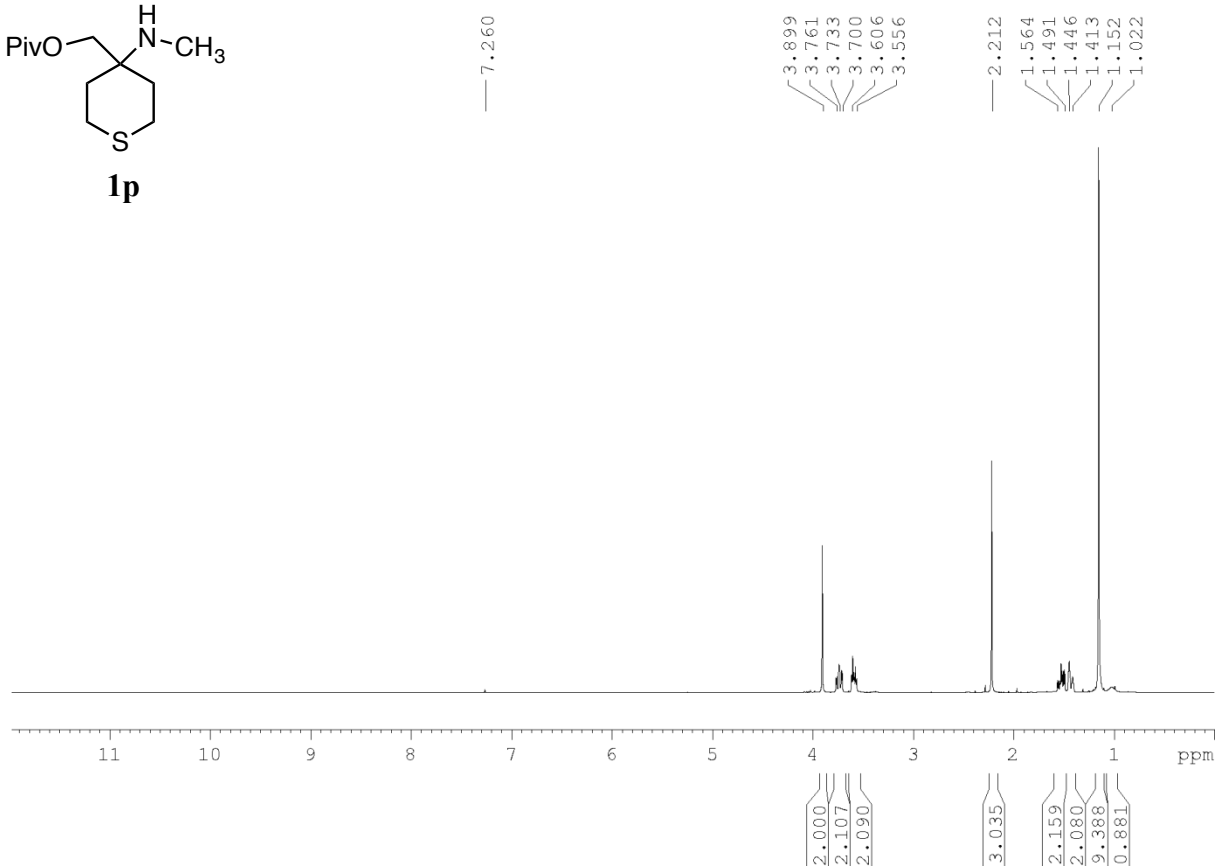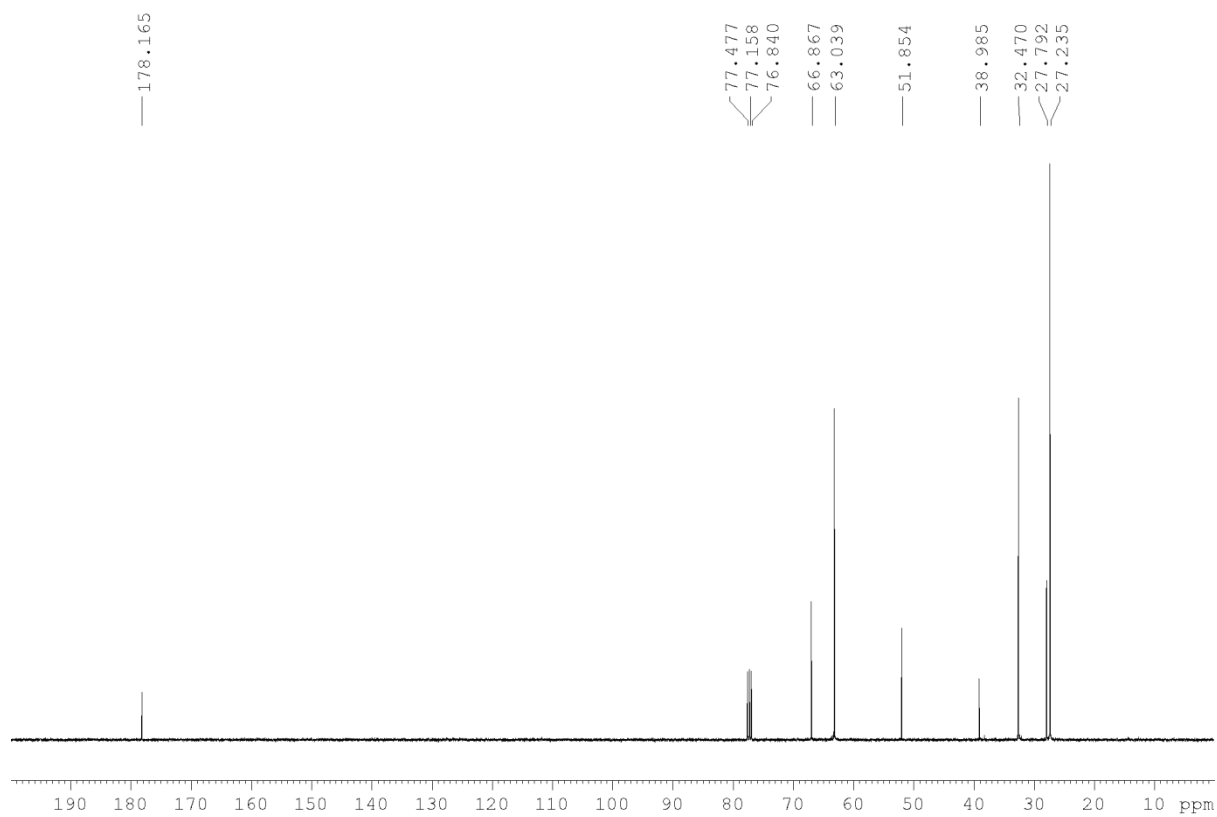

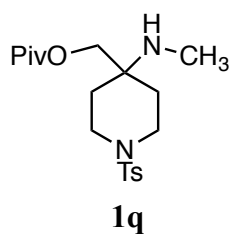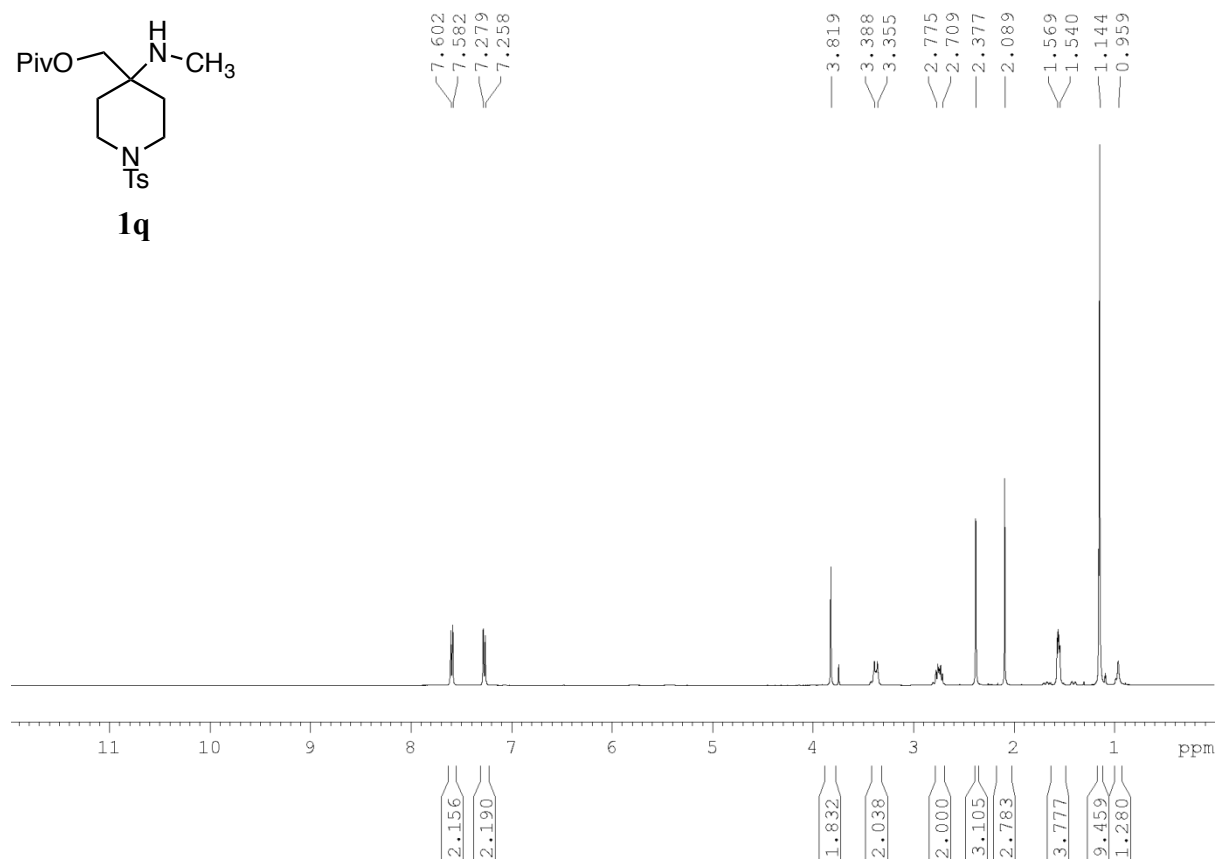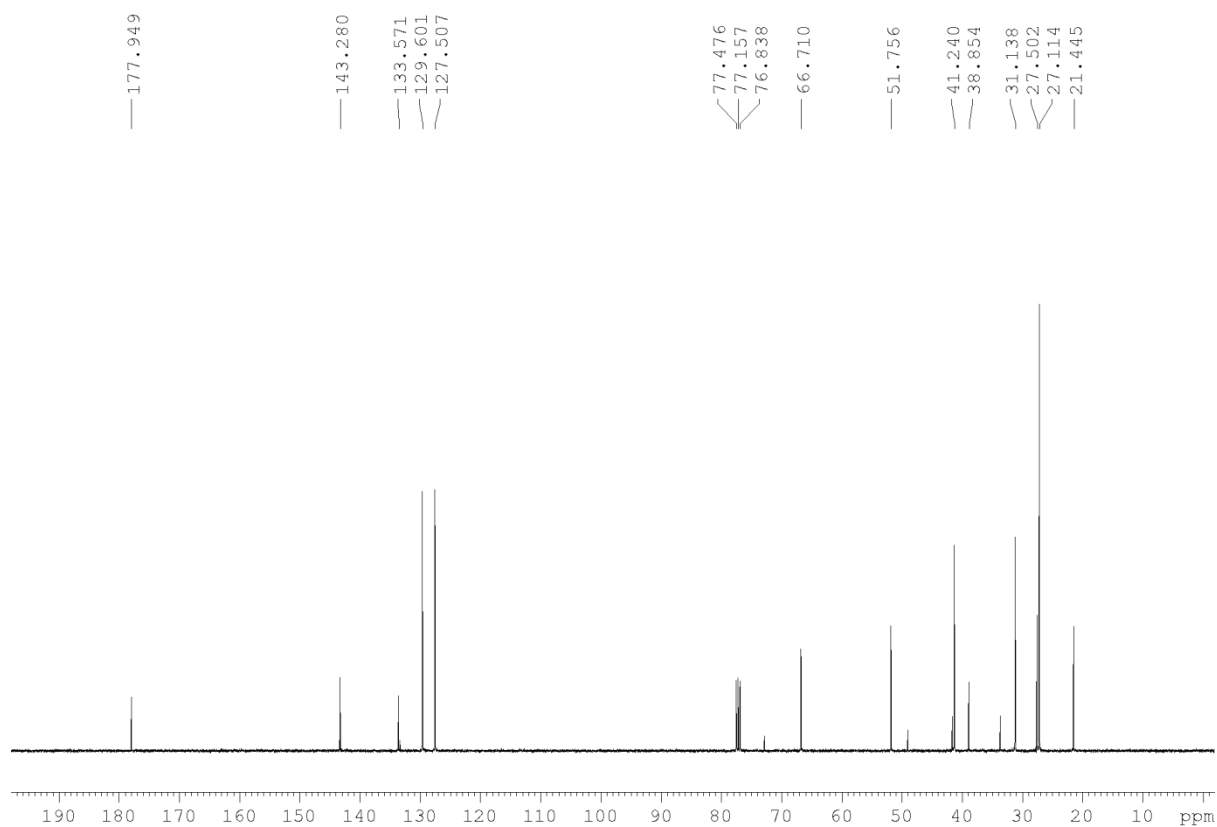

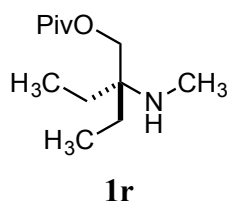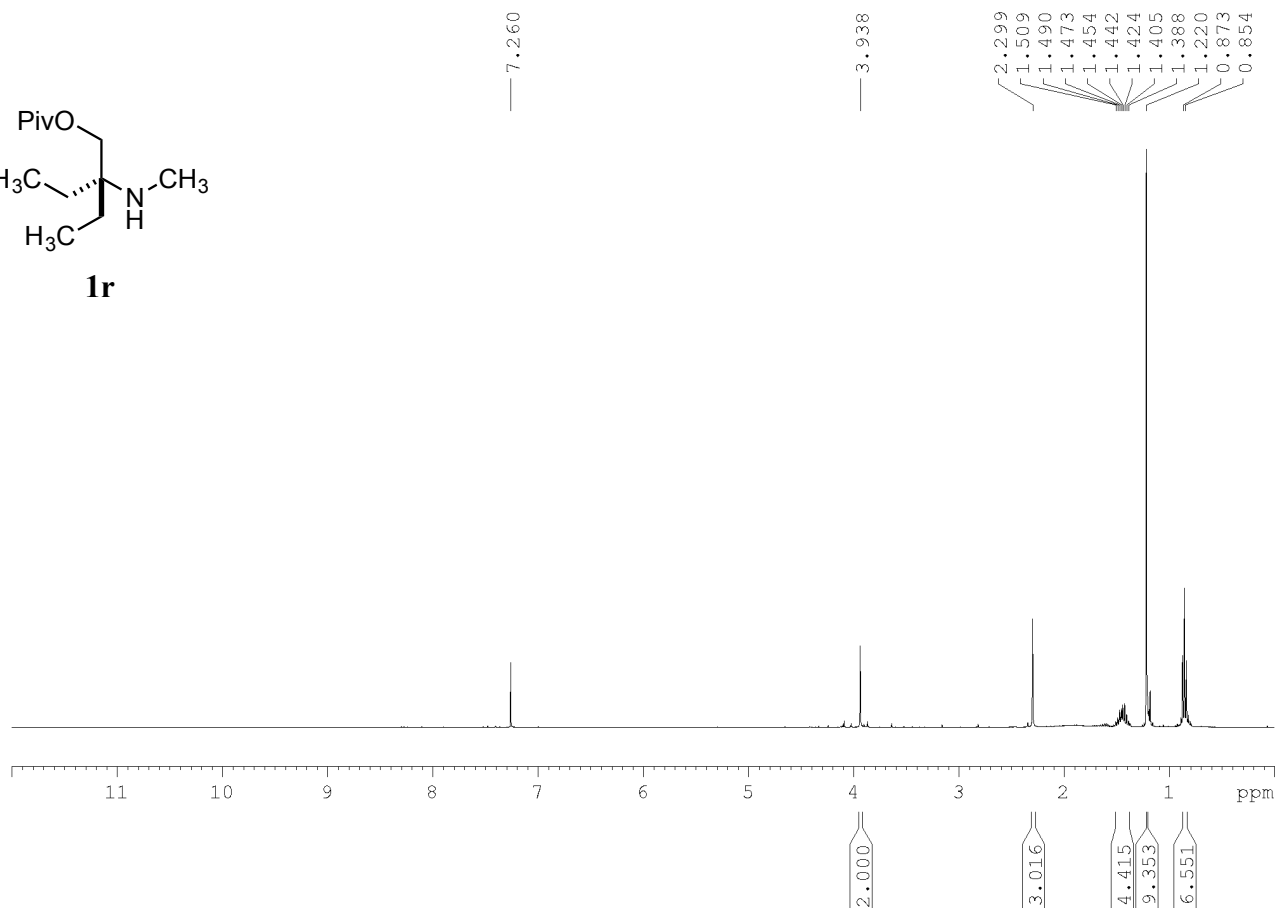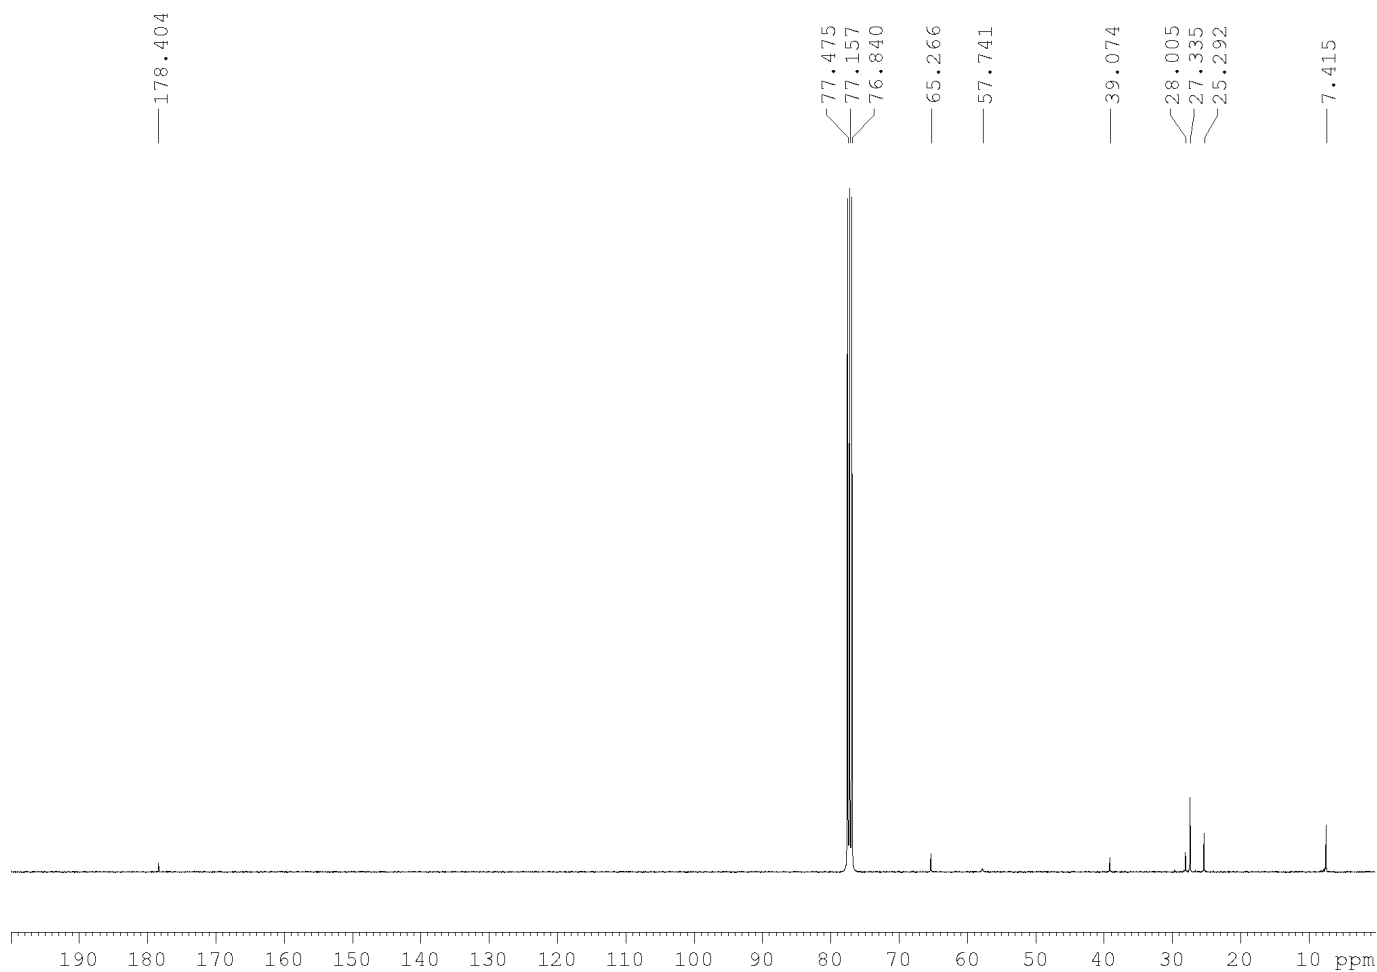

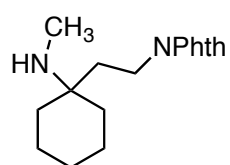

**1s**

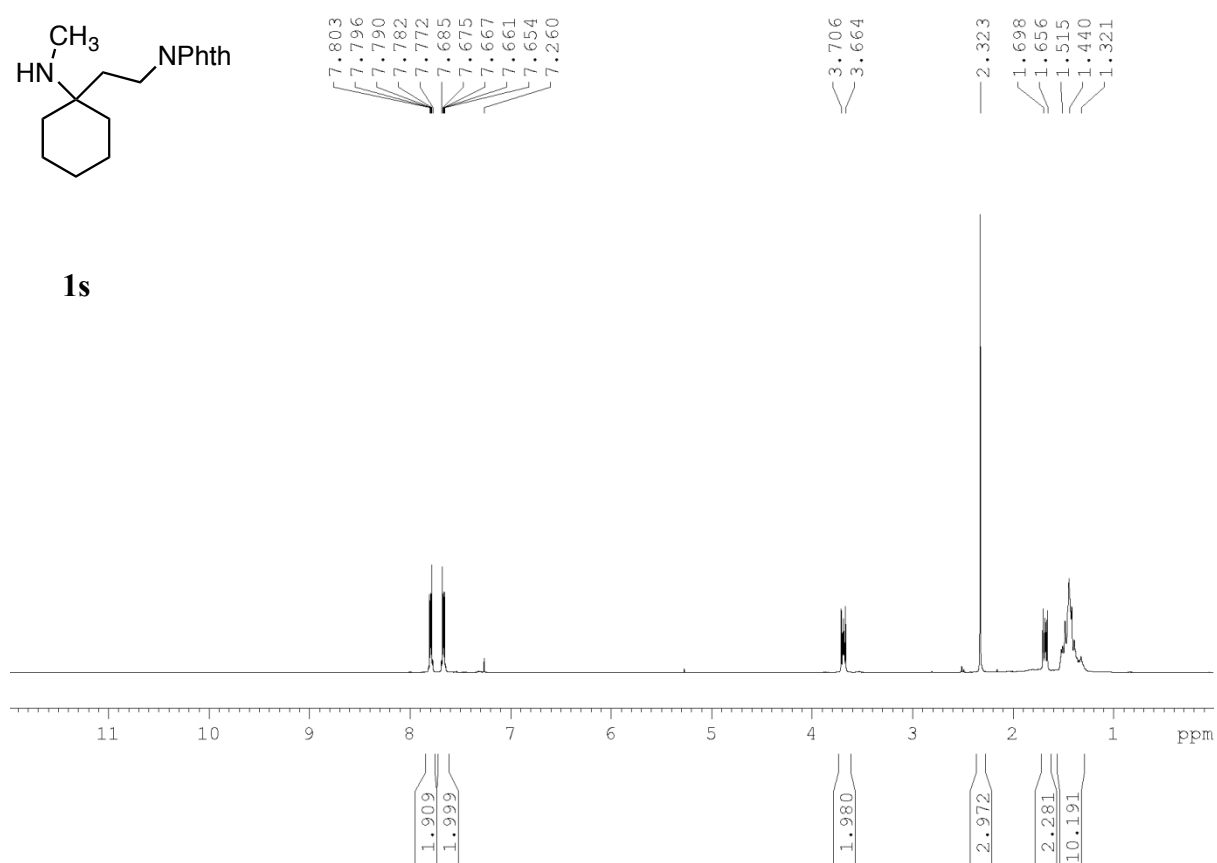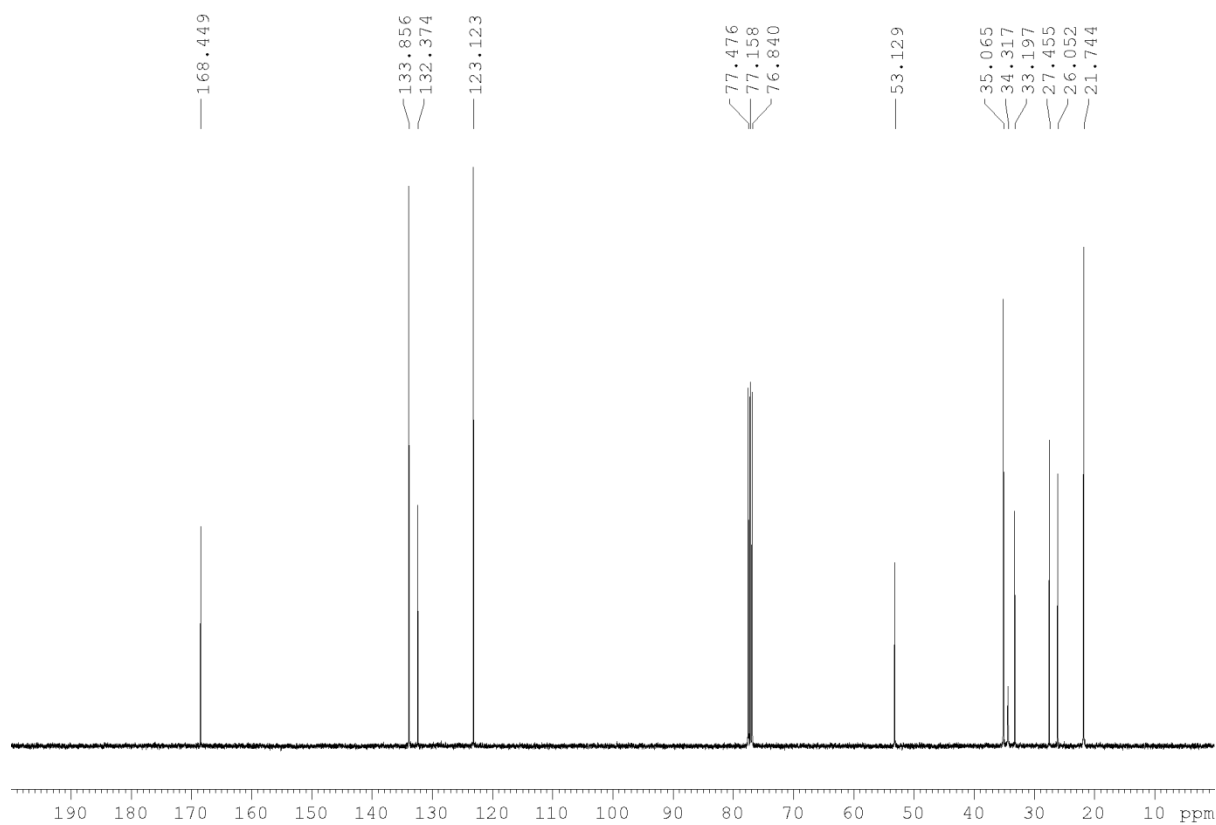

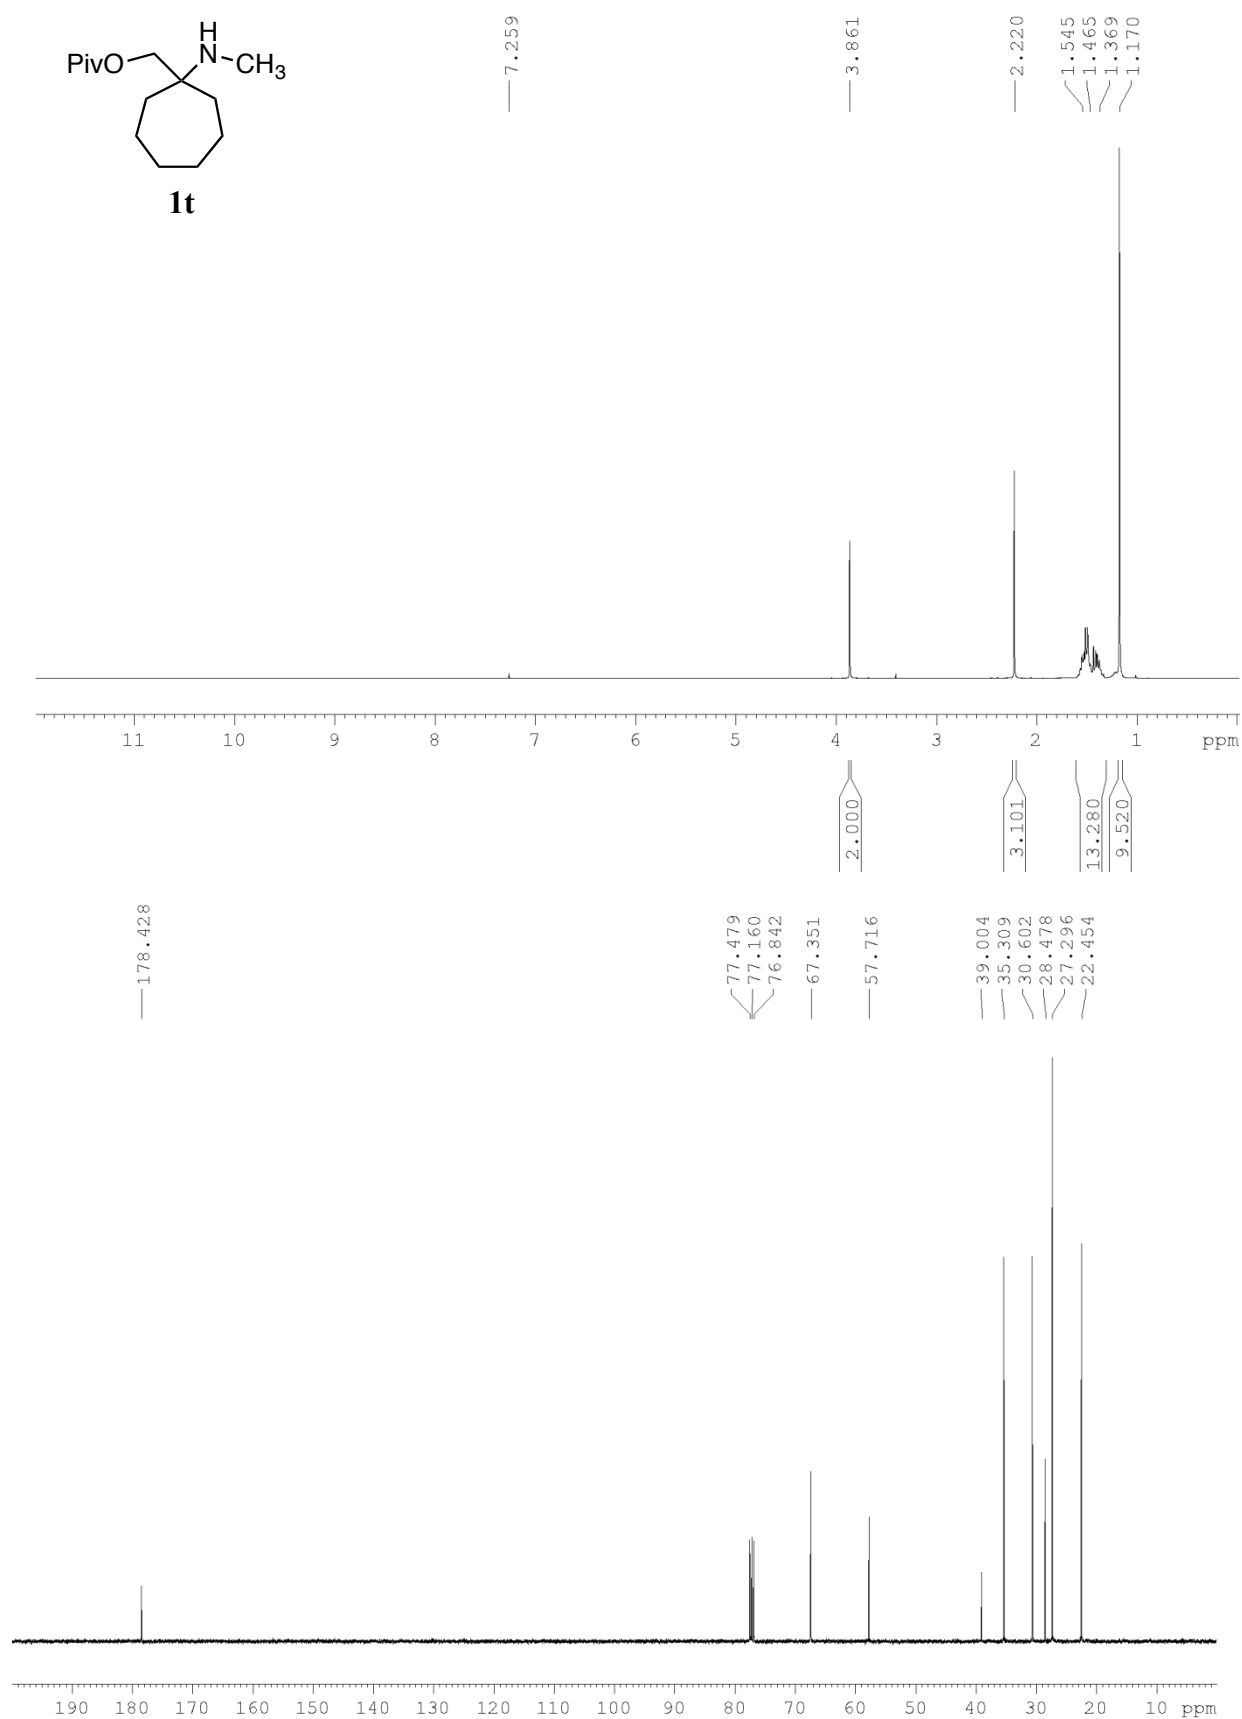

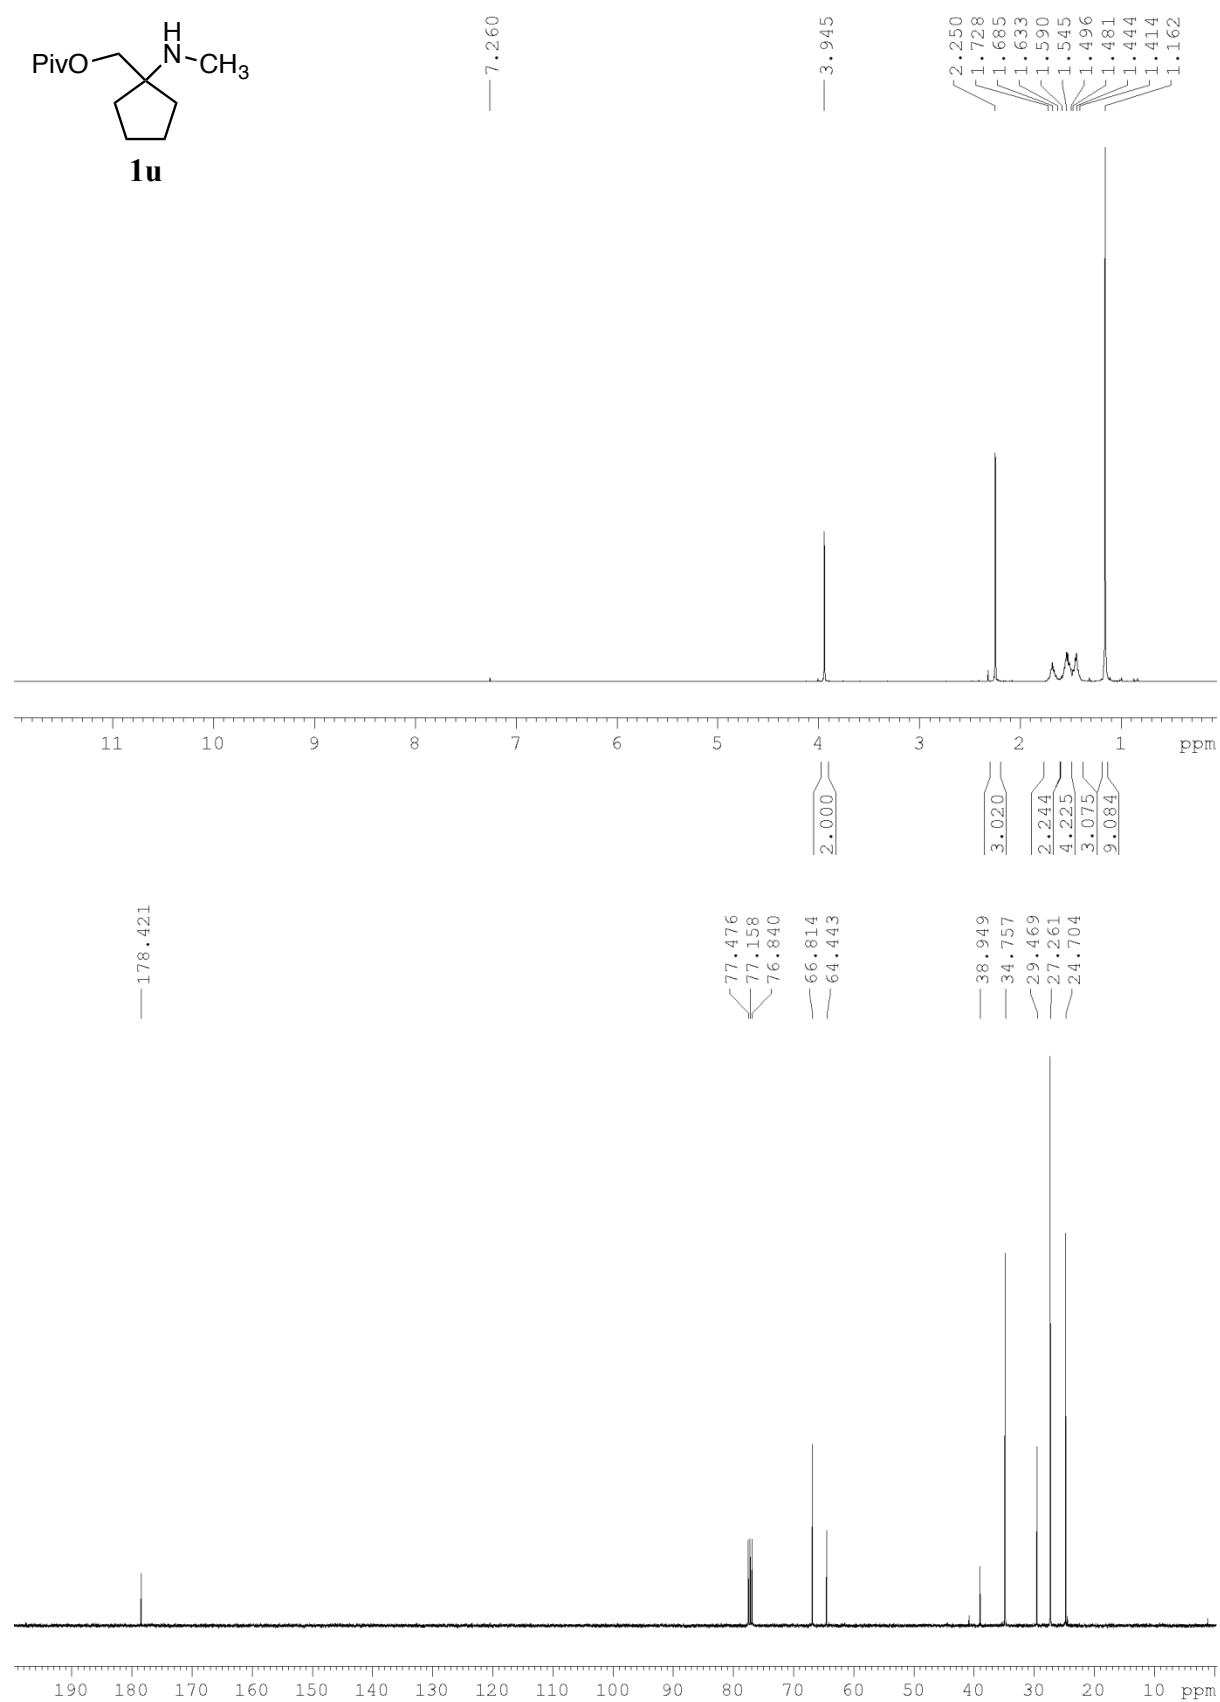

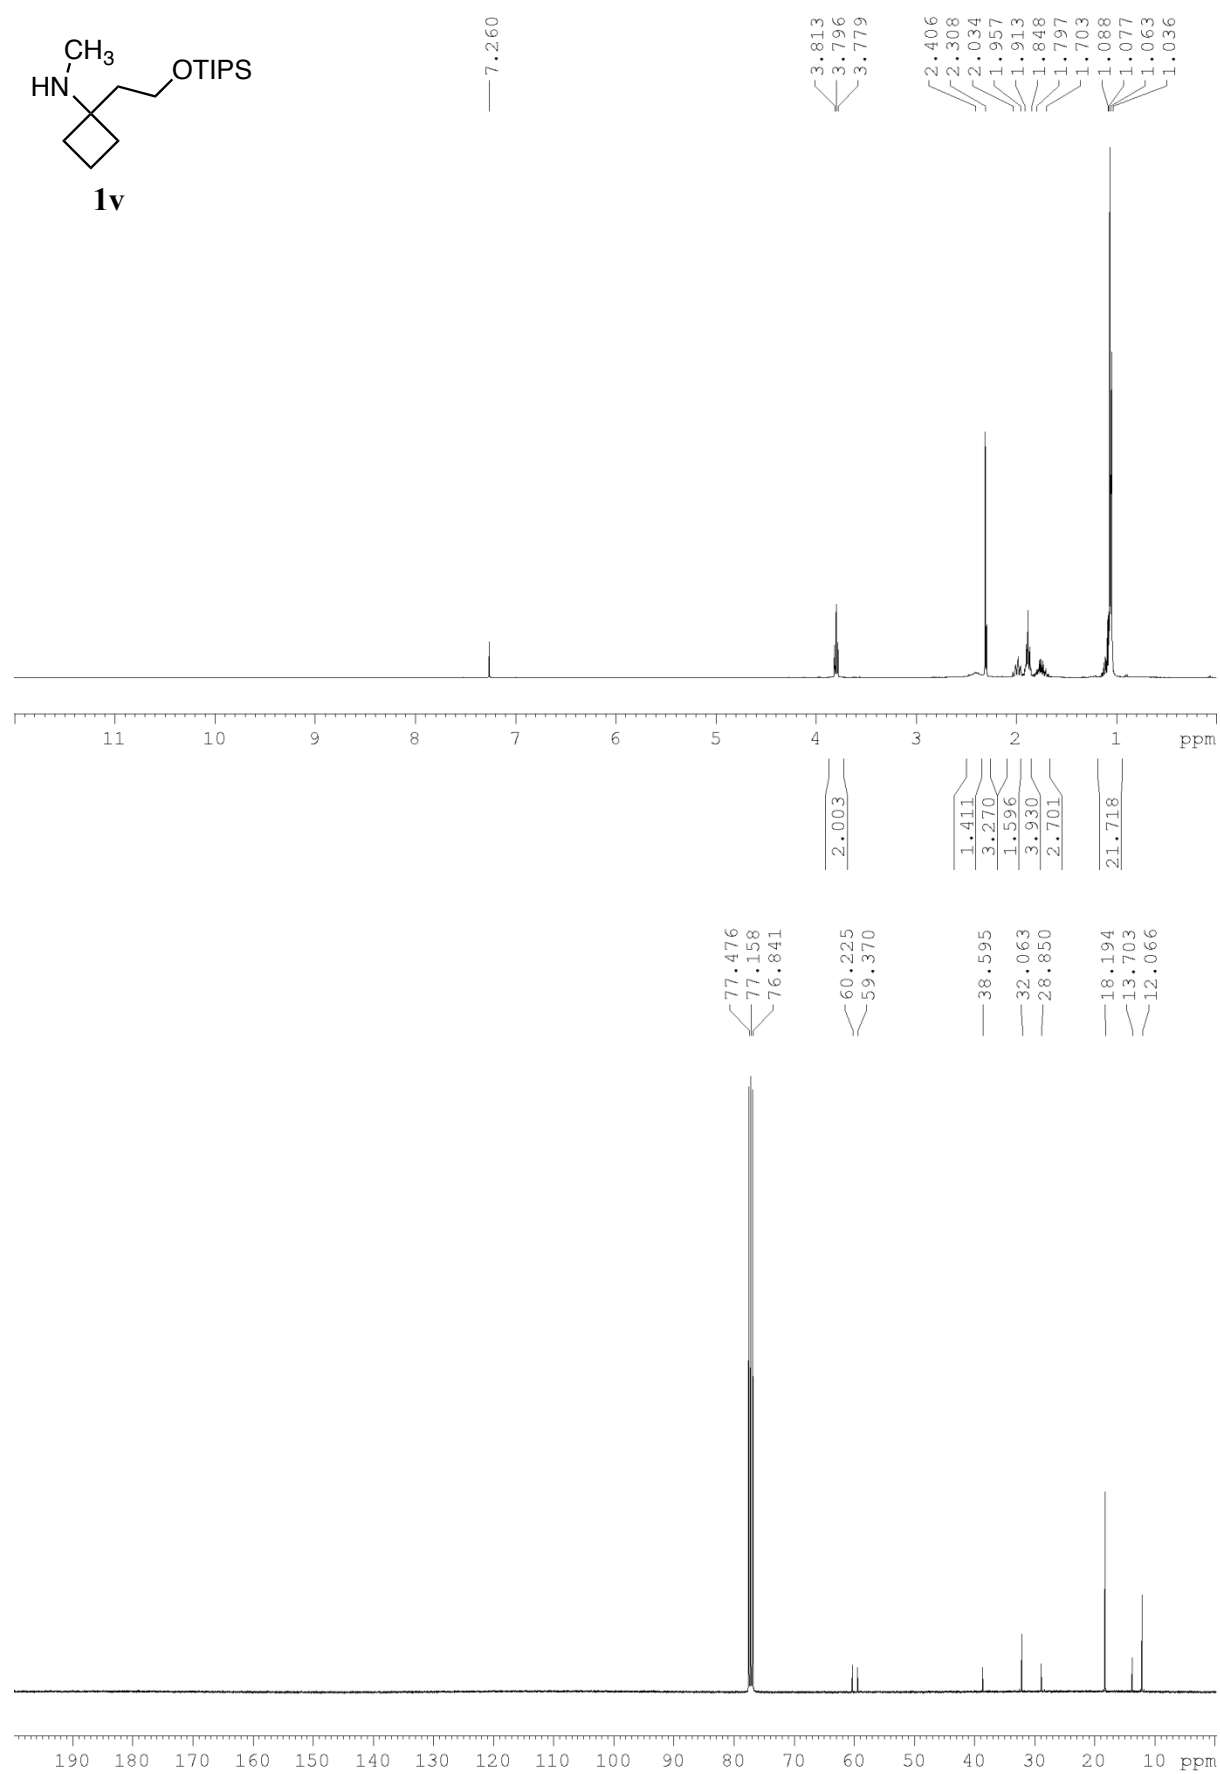

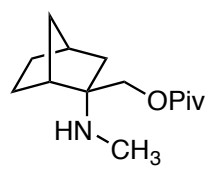

**1w**

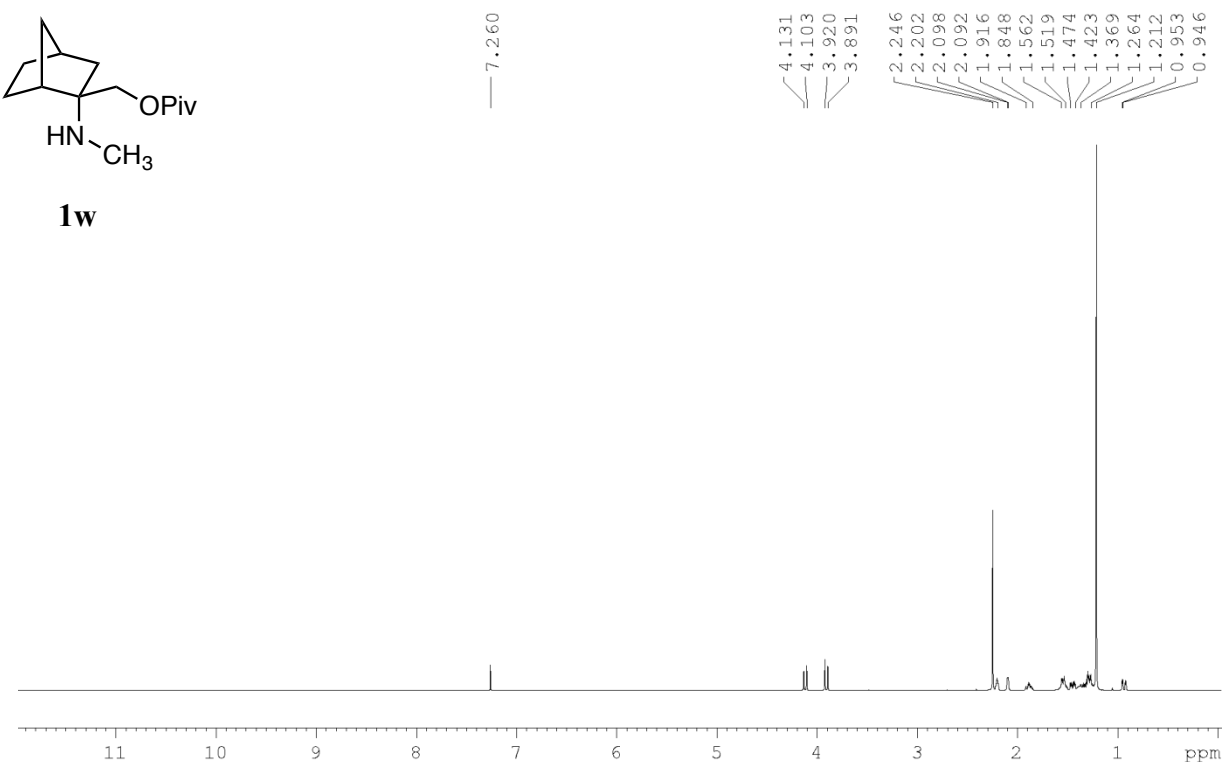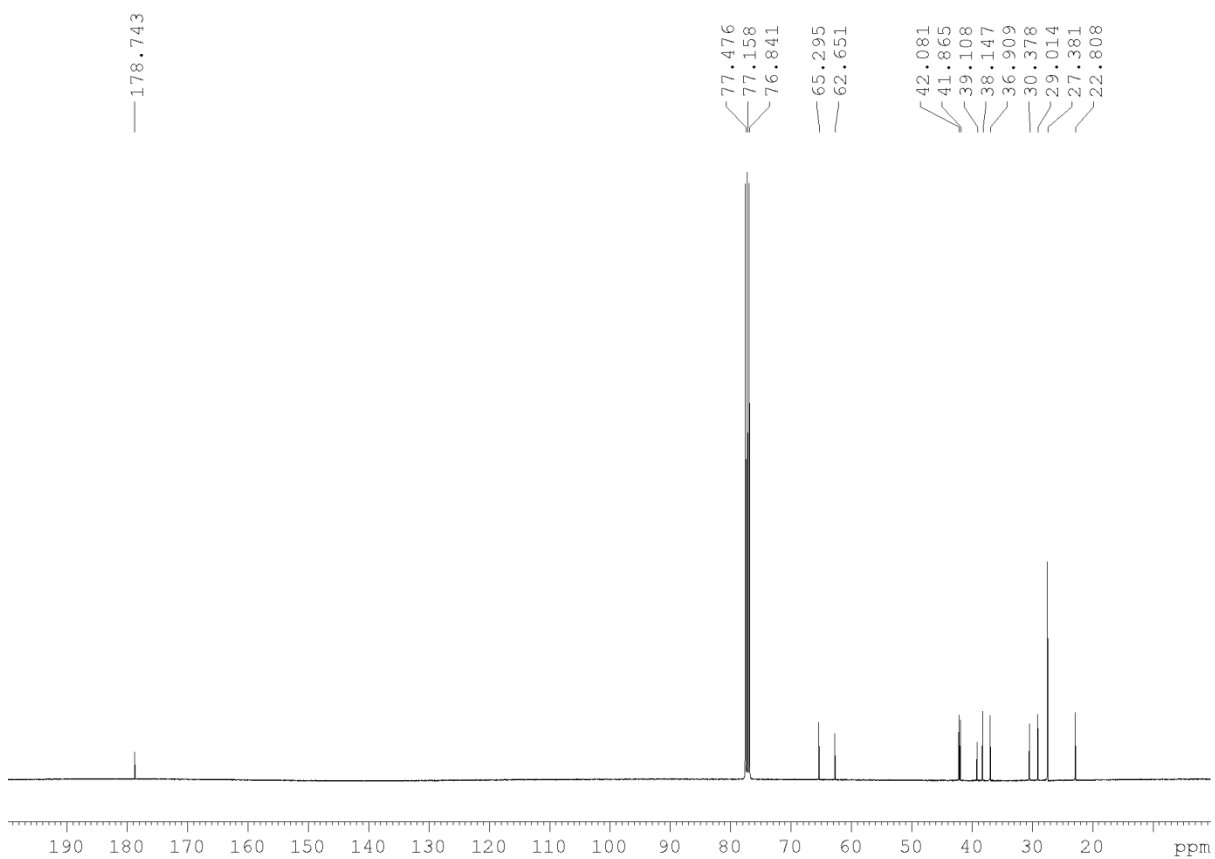

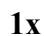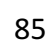

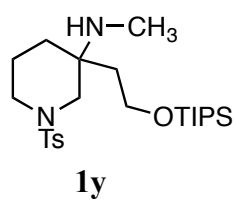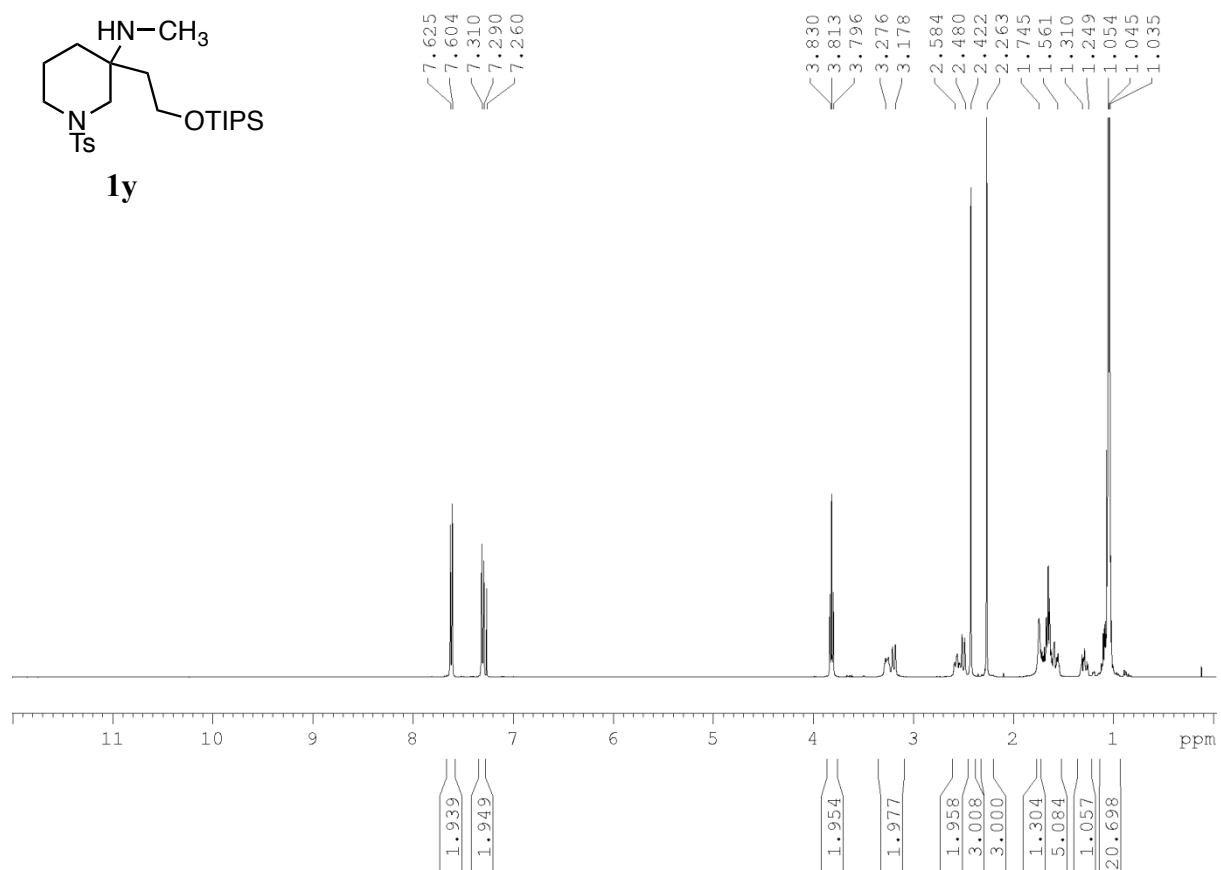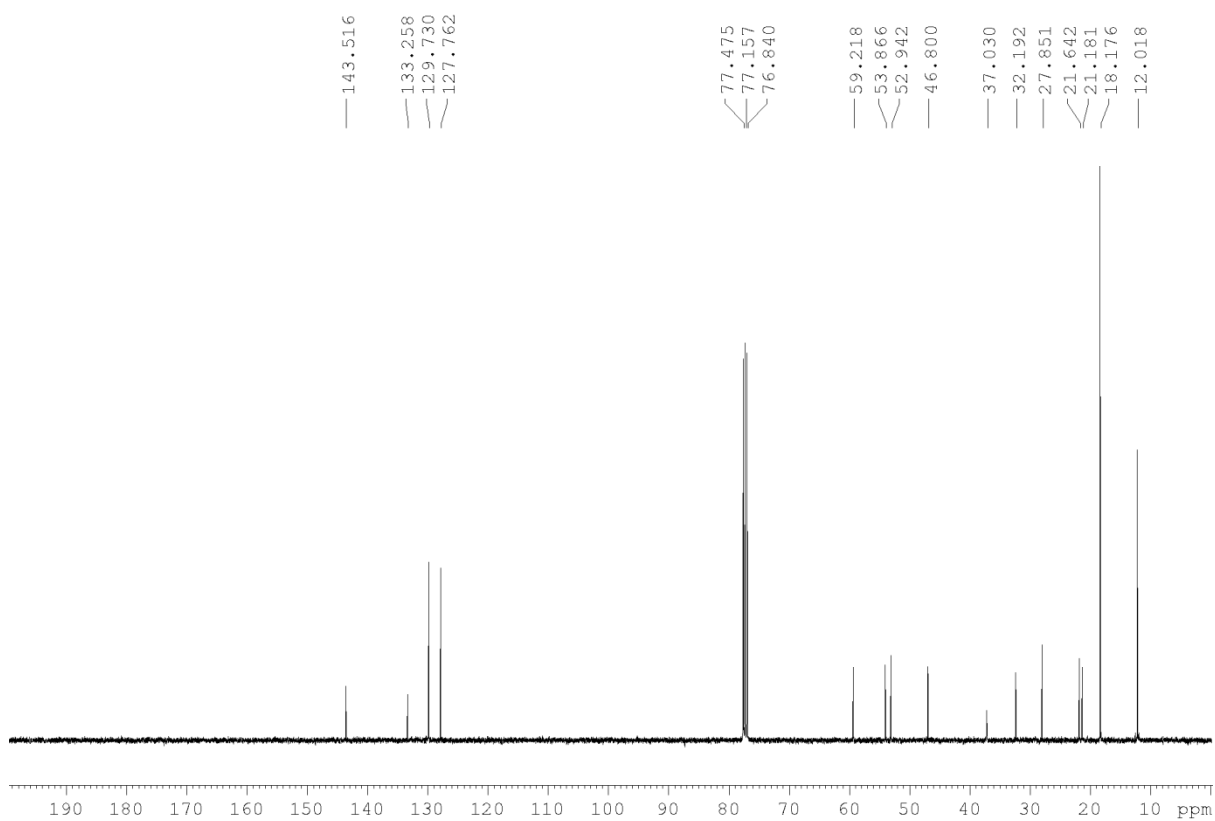

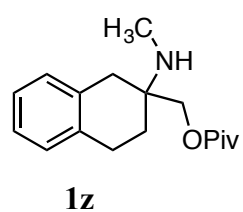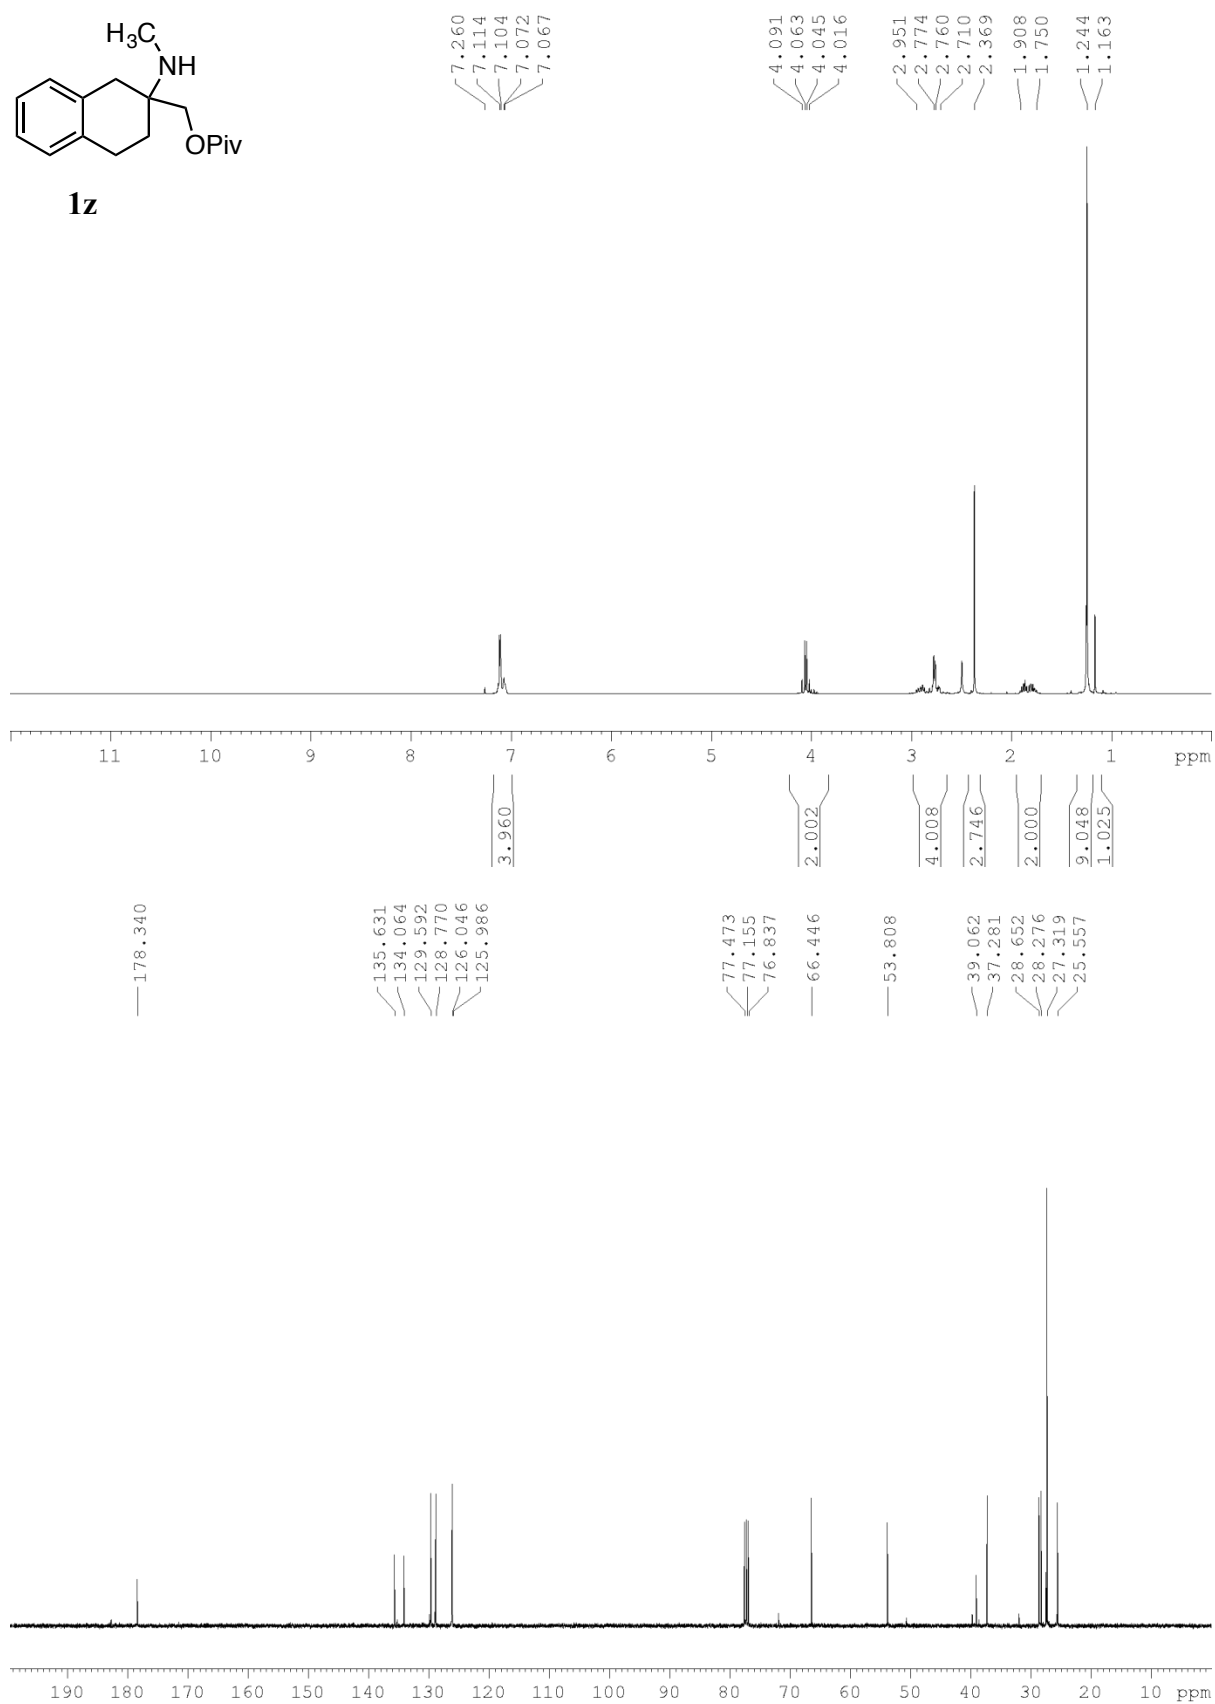

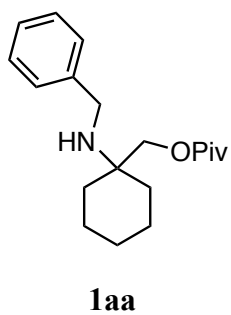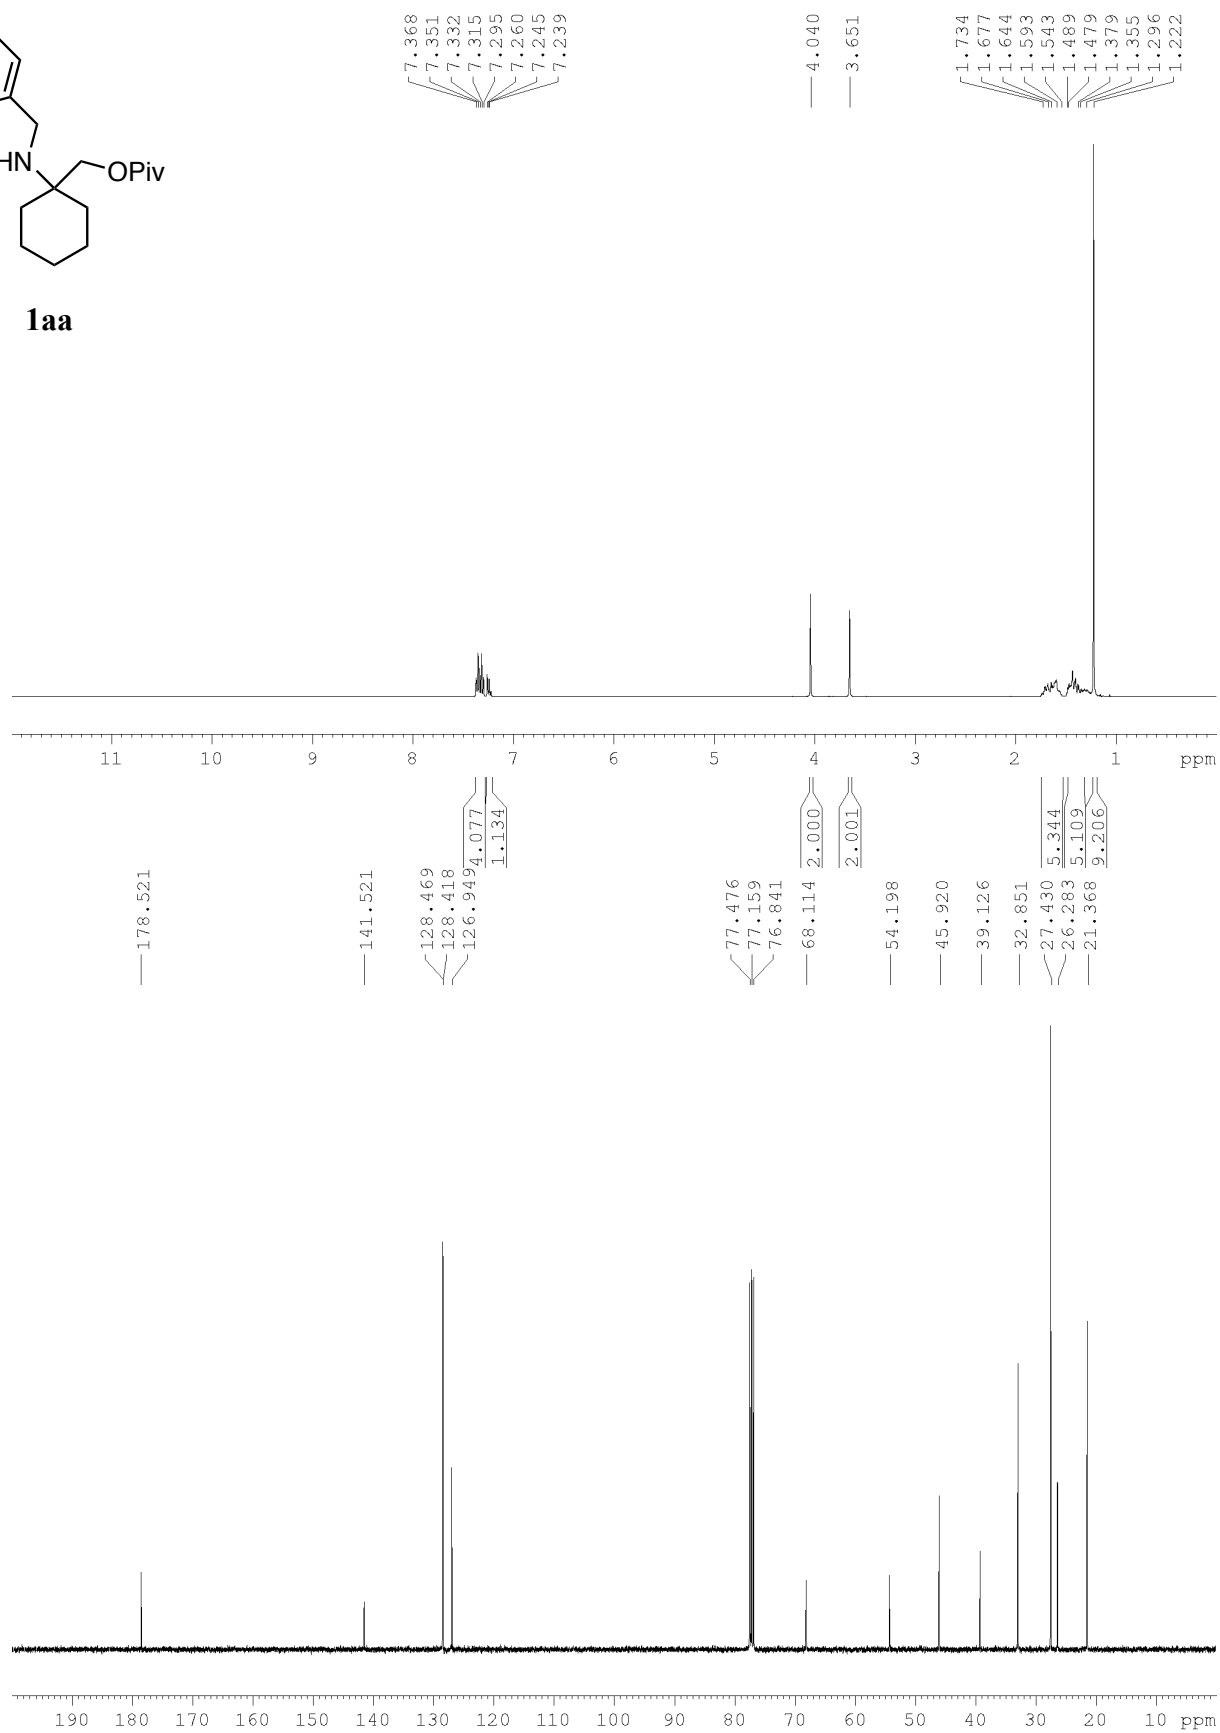

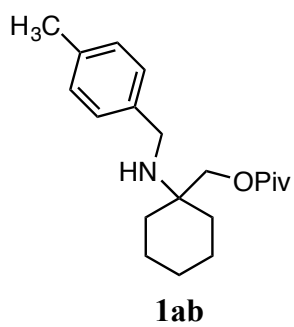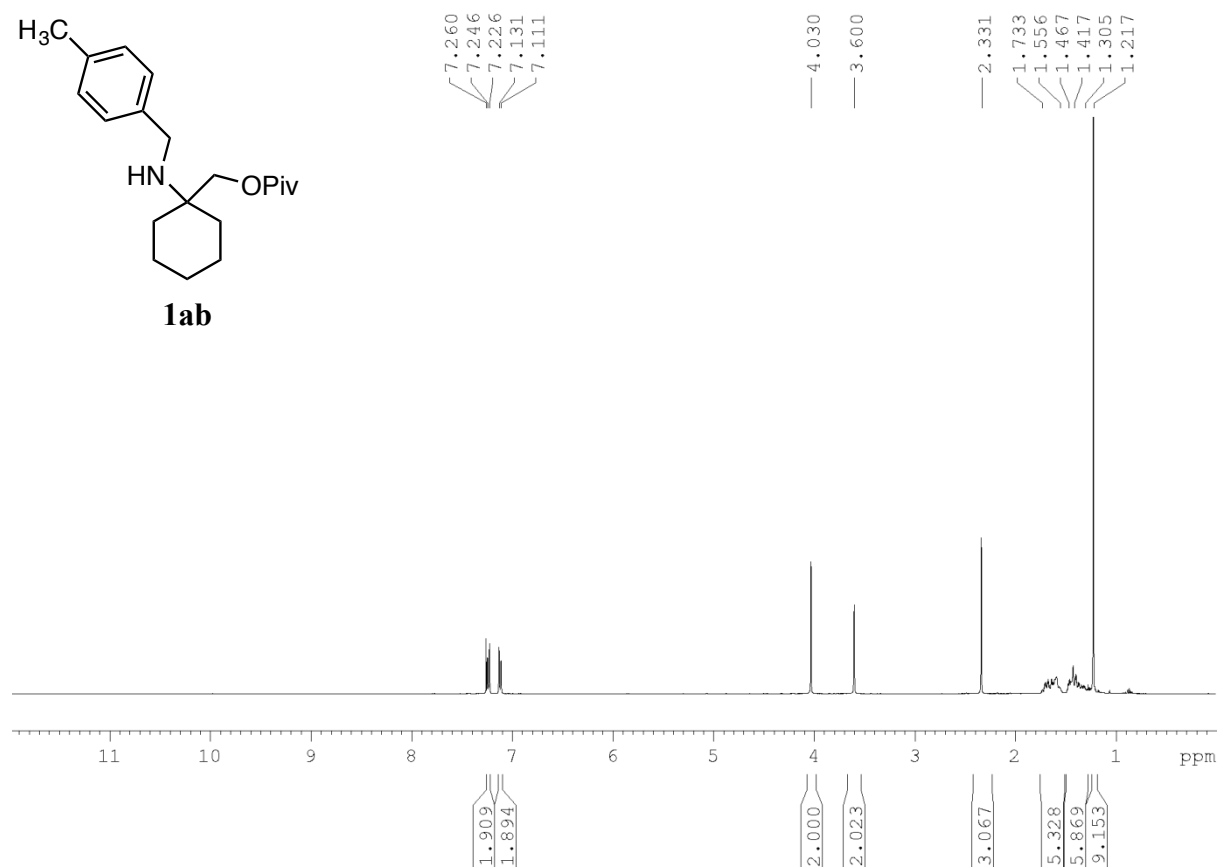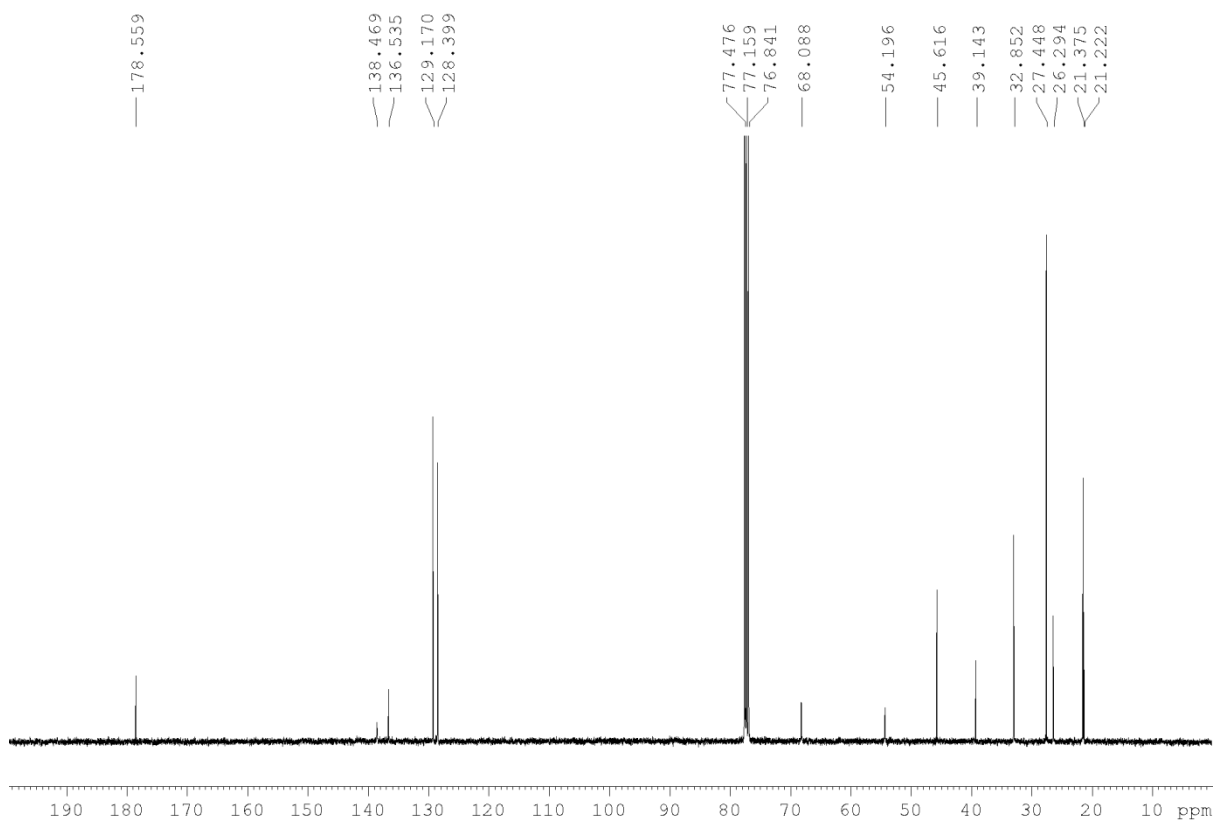

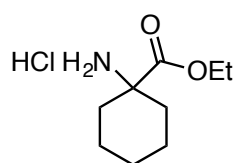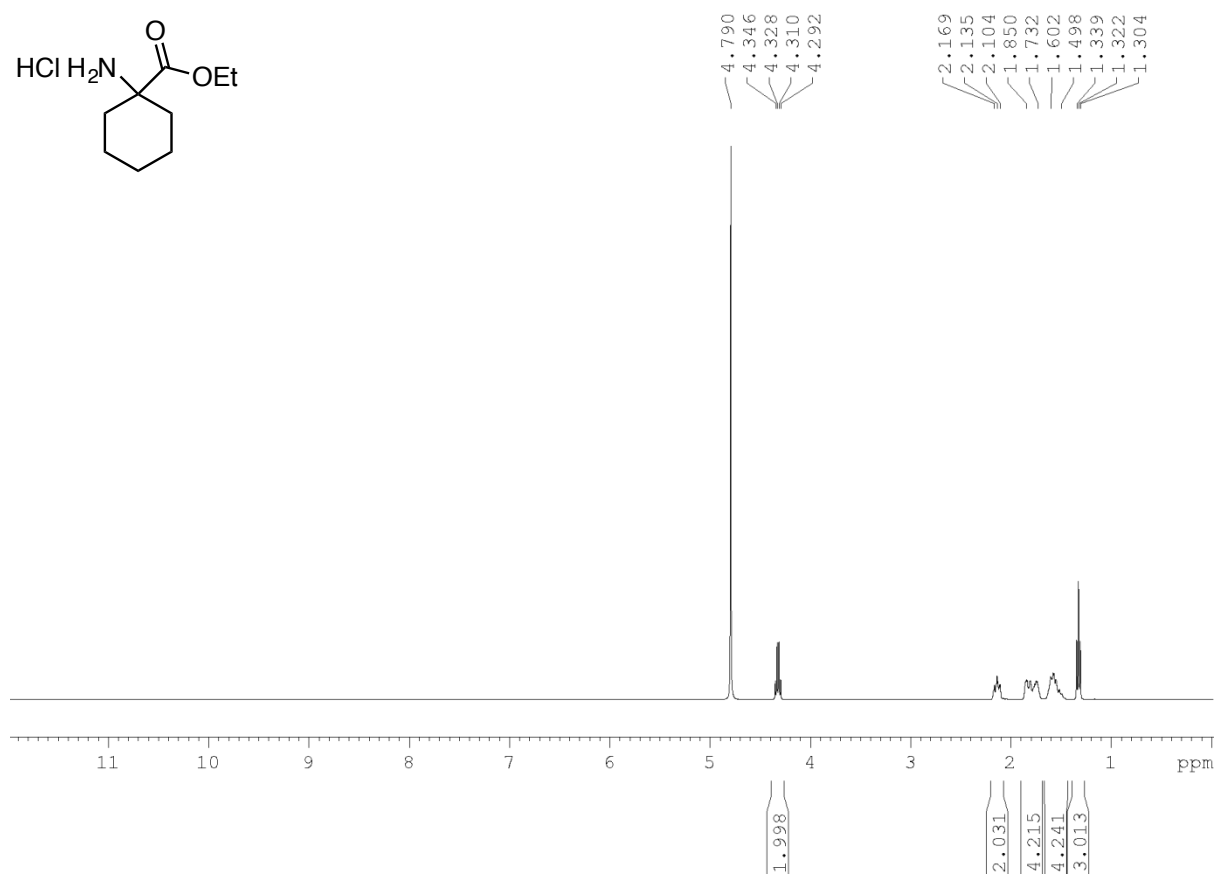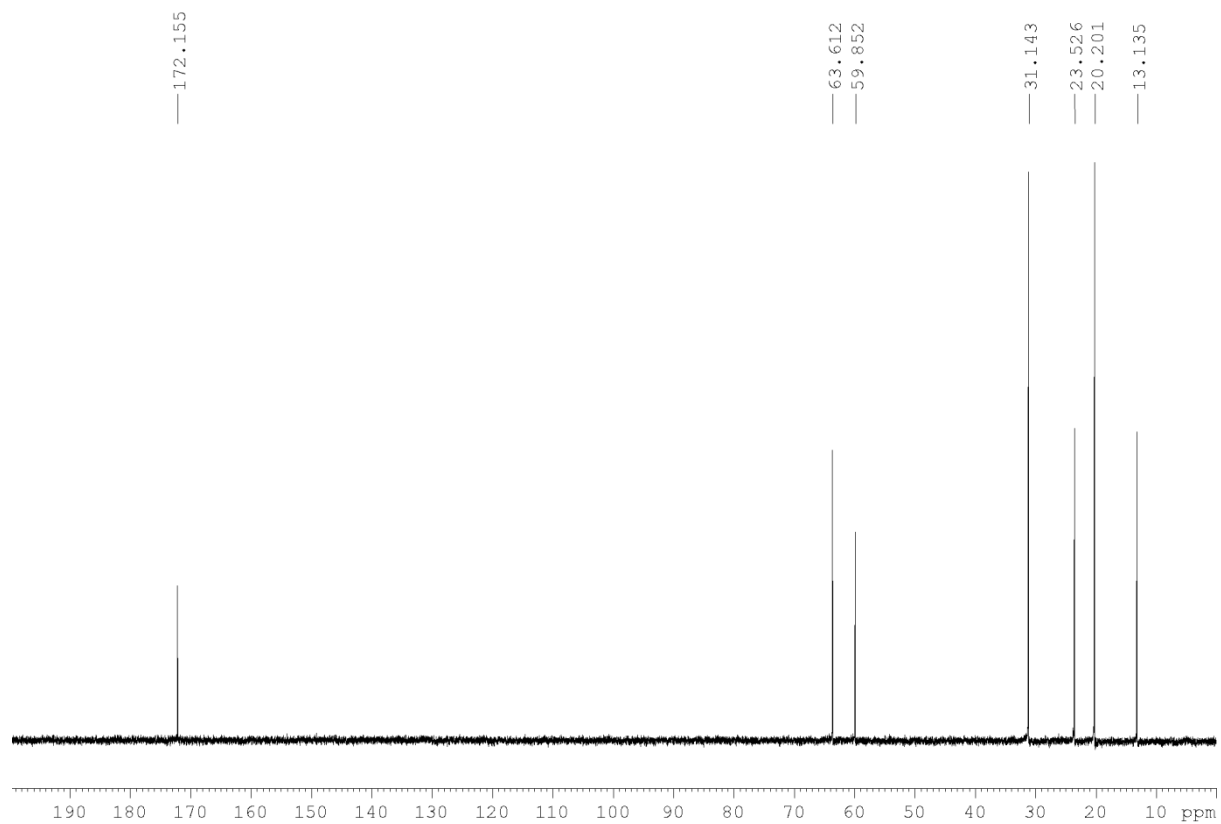

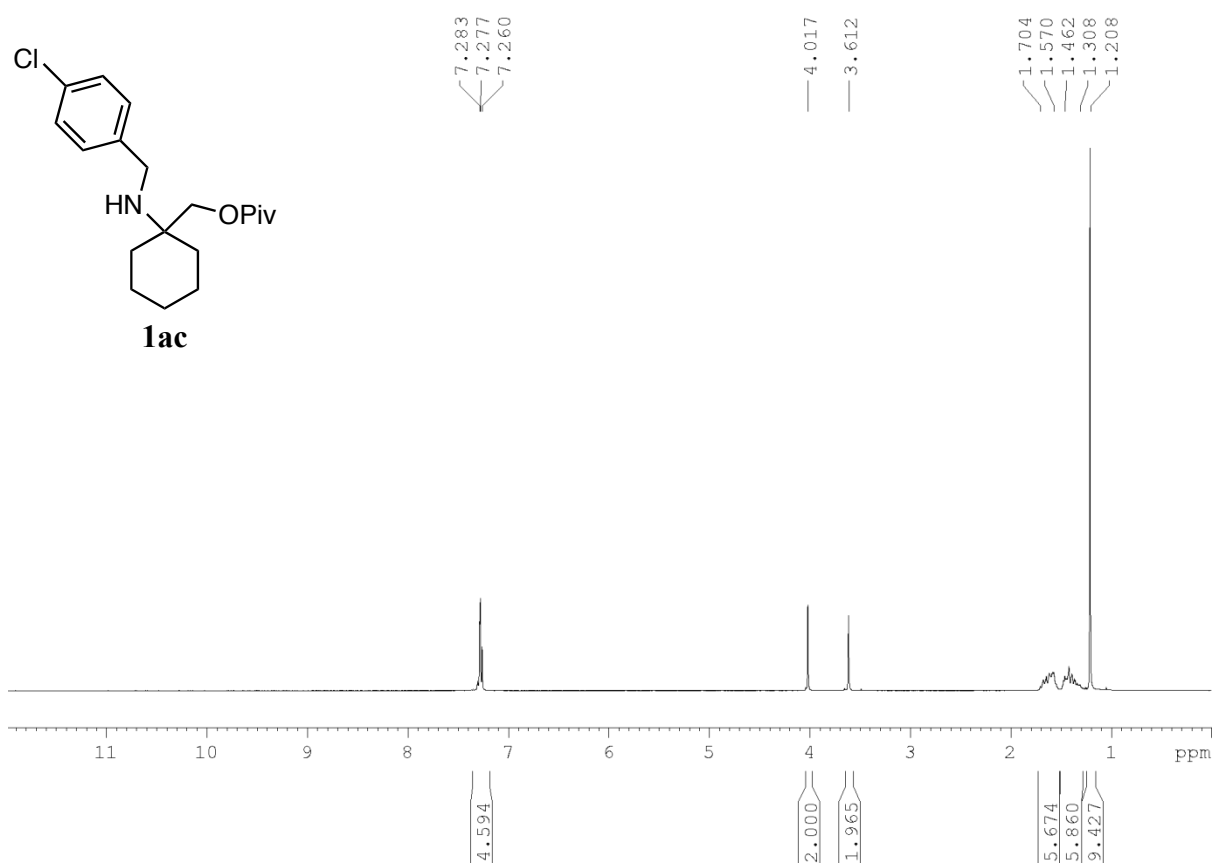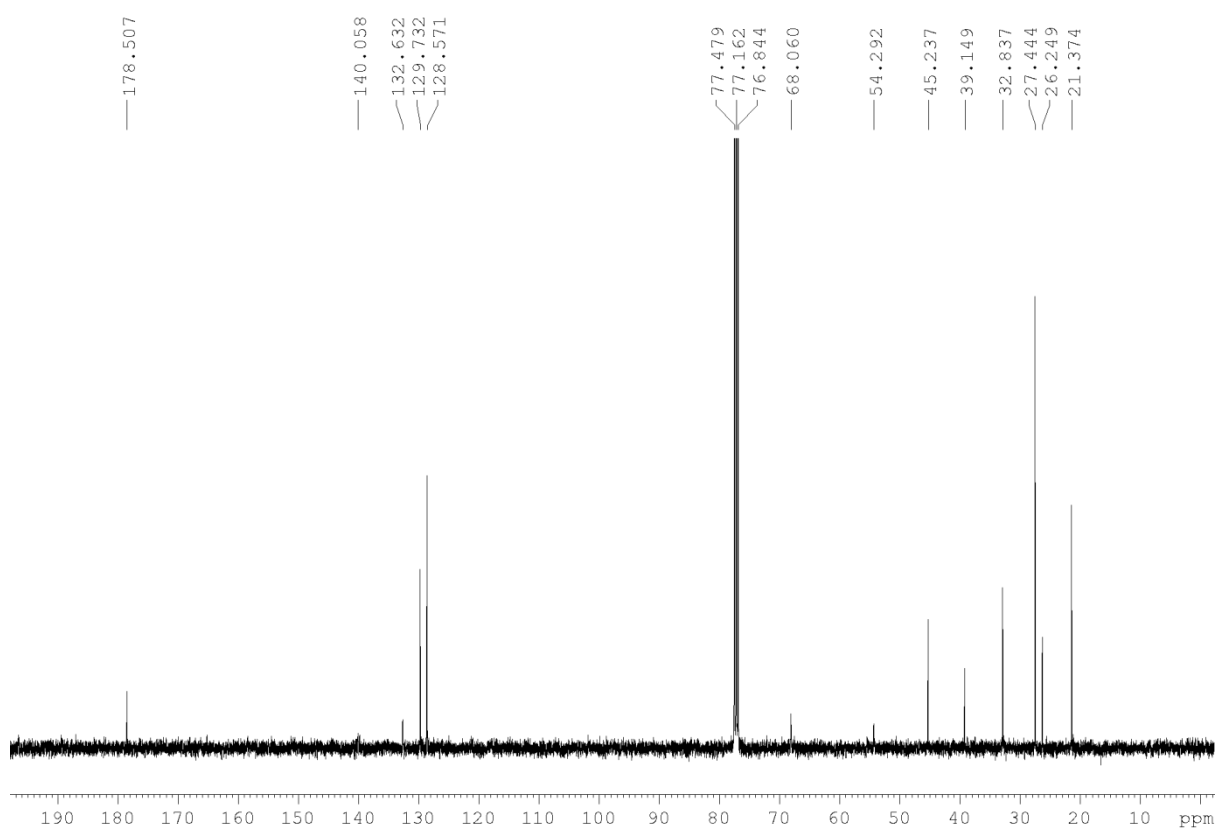

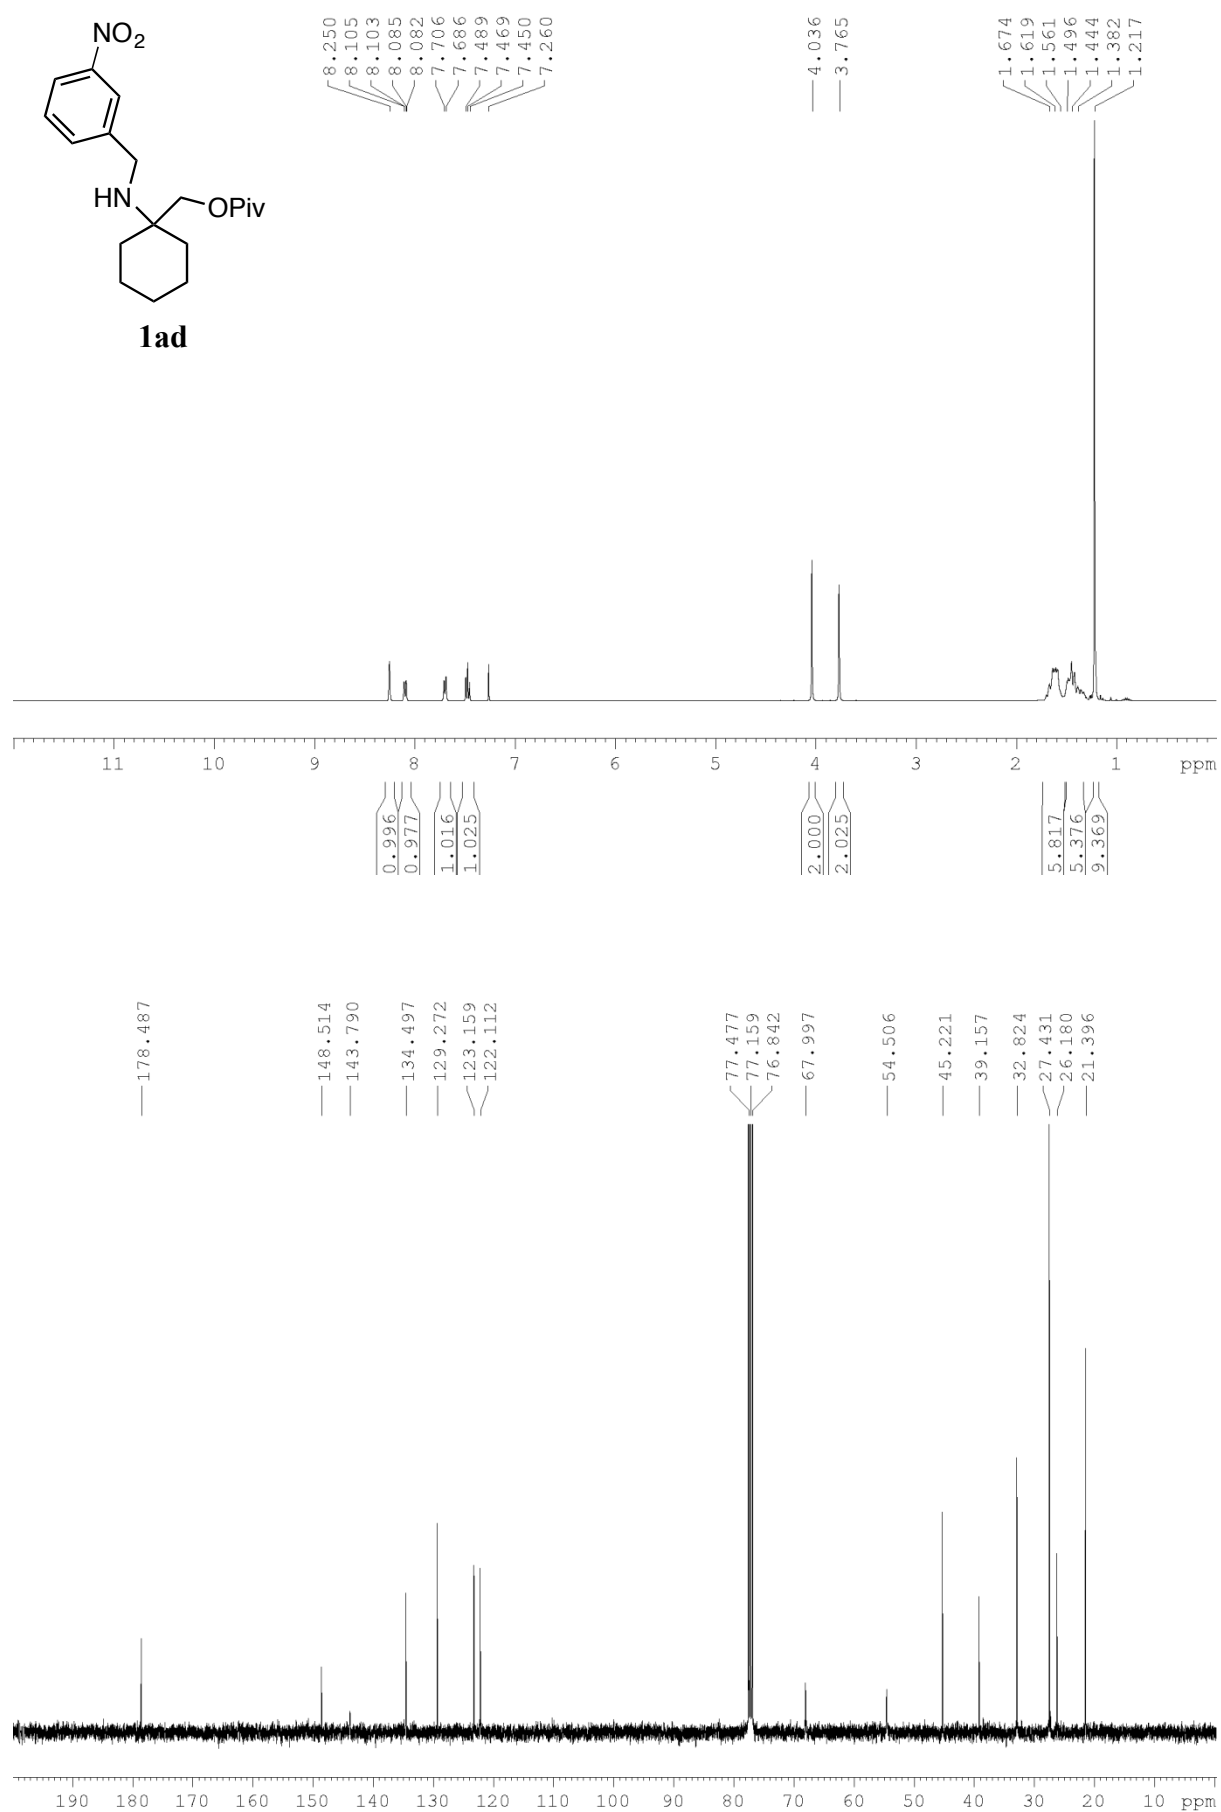

## **NMR of $\beta$ -Lactam Products**

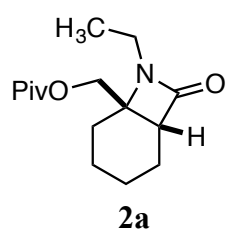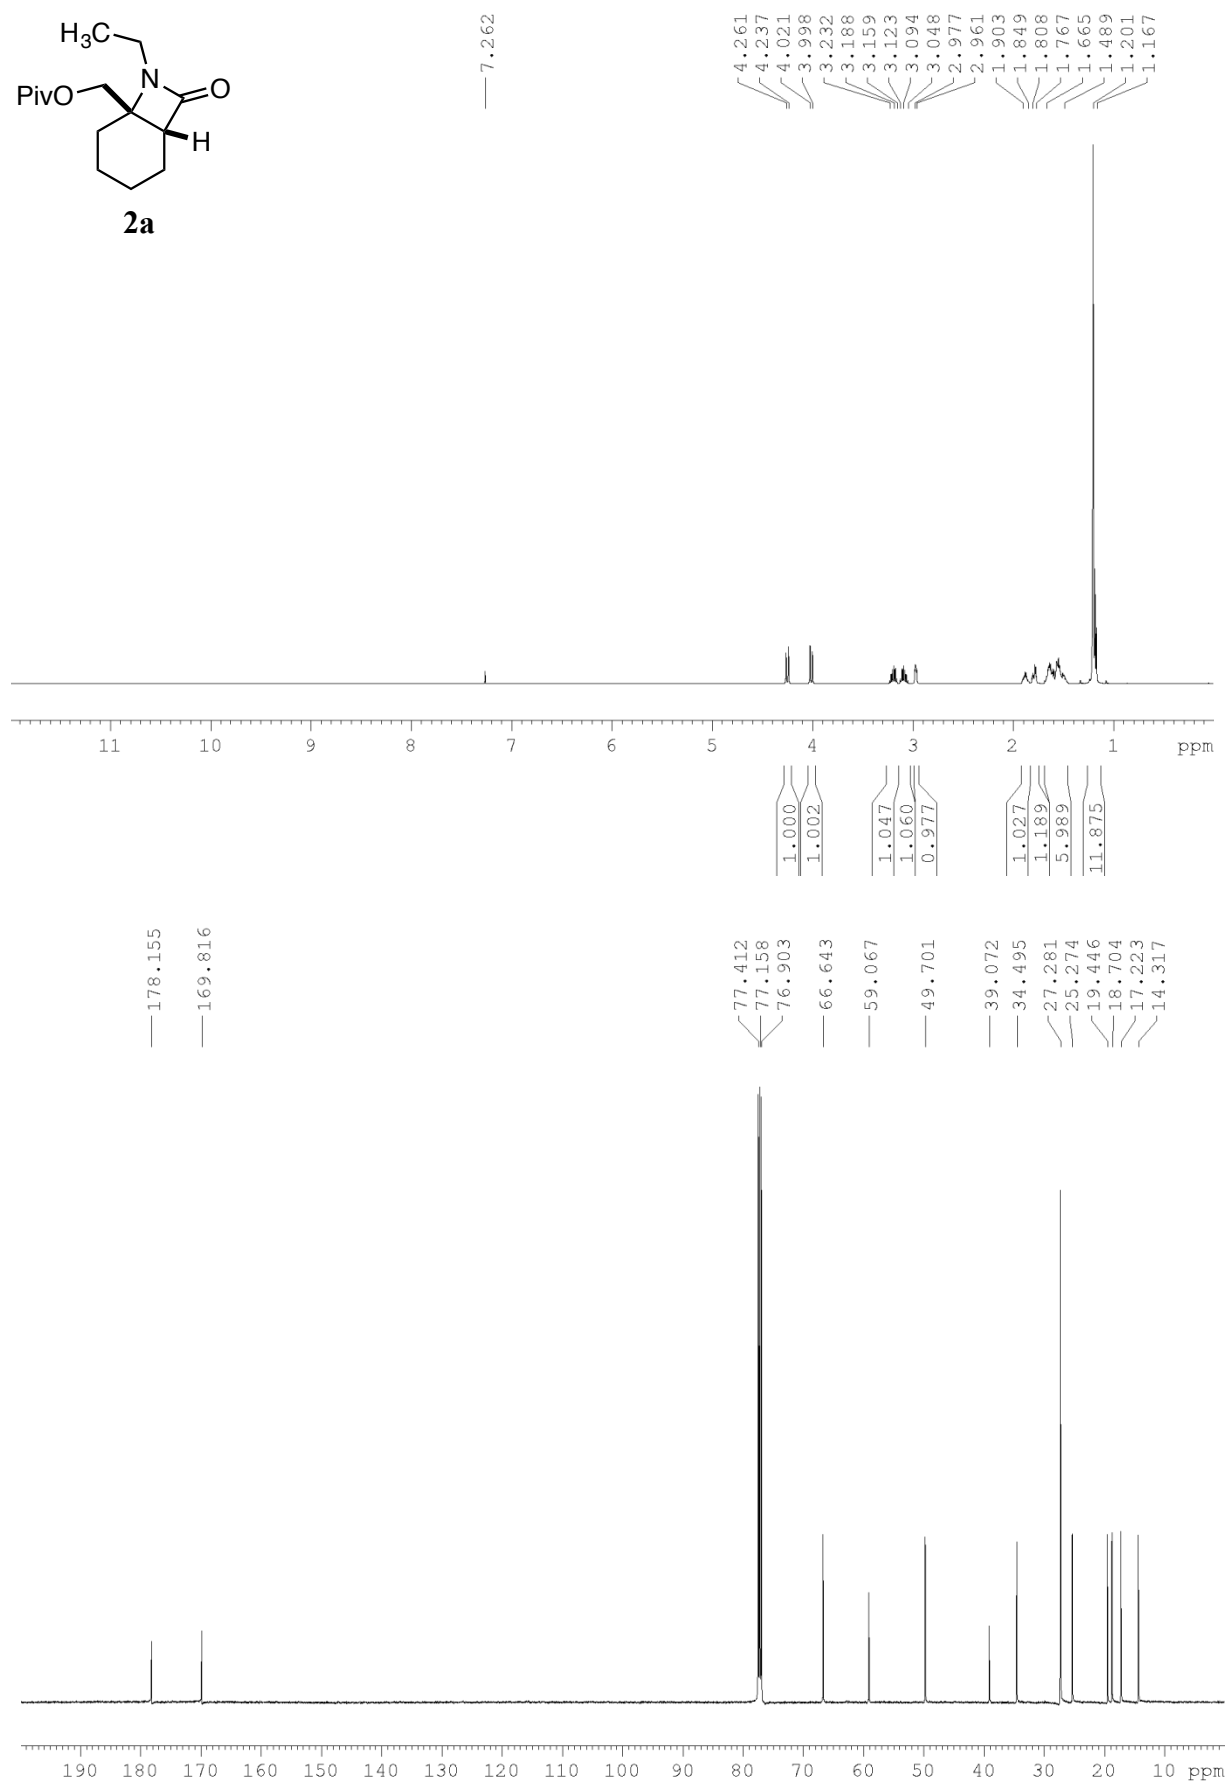

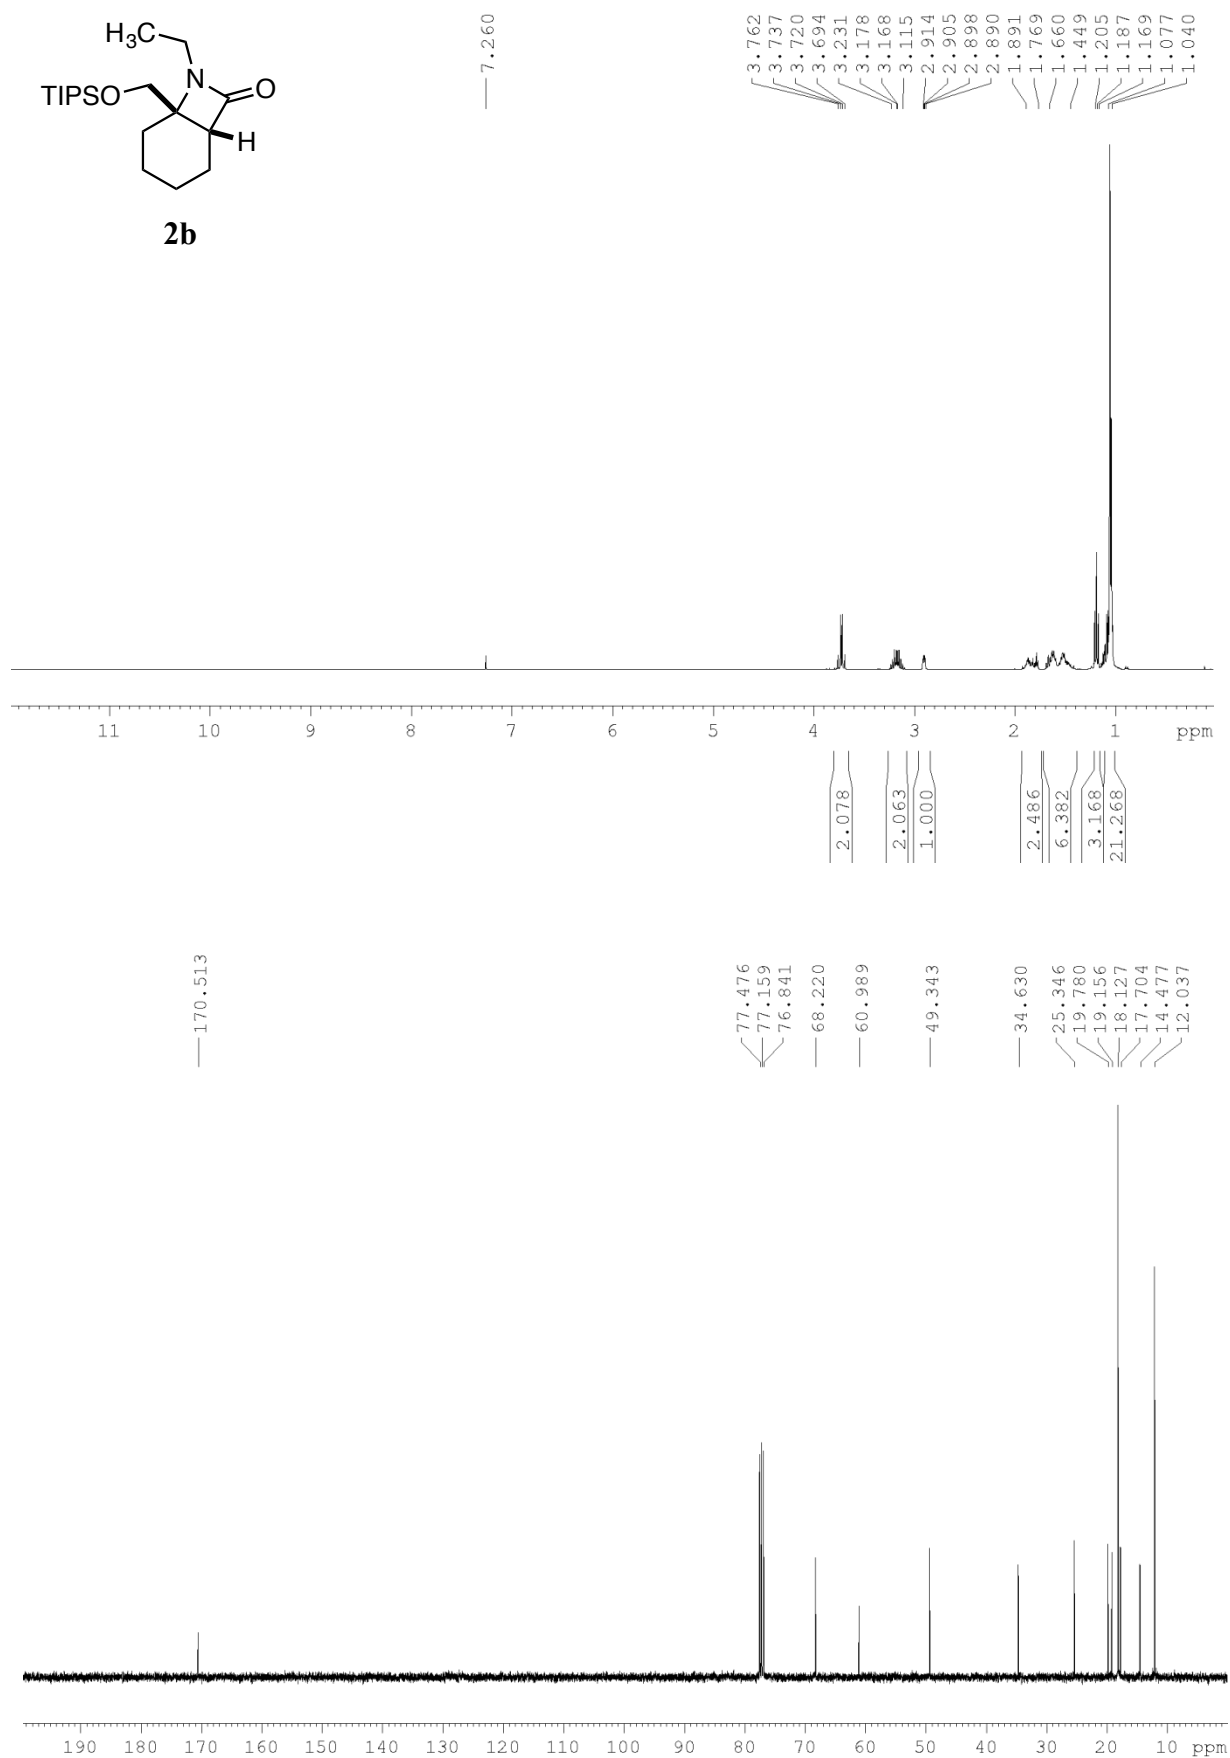

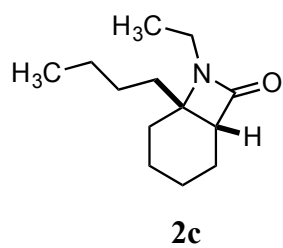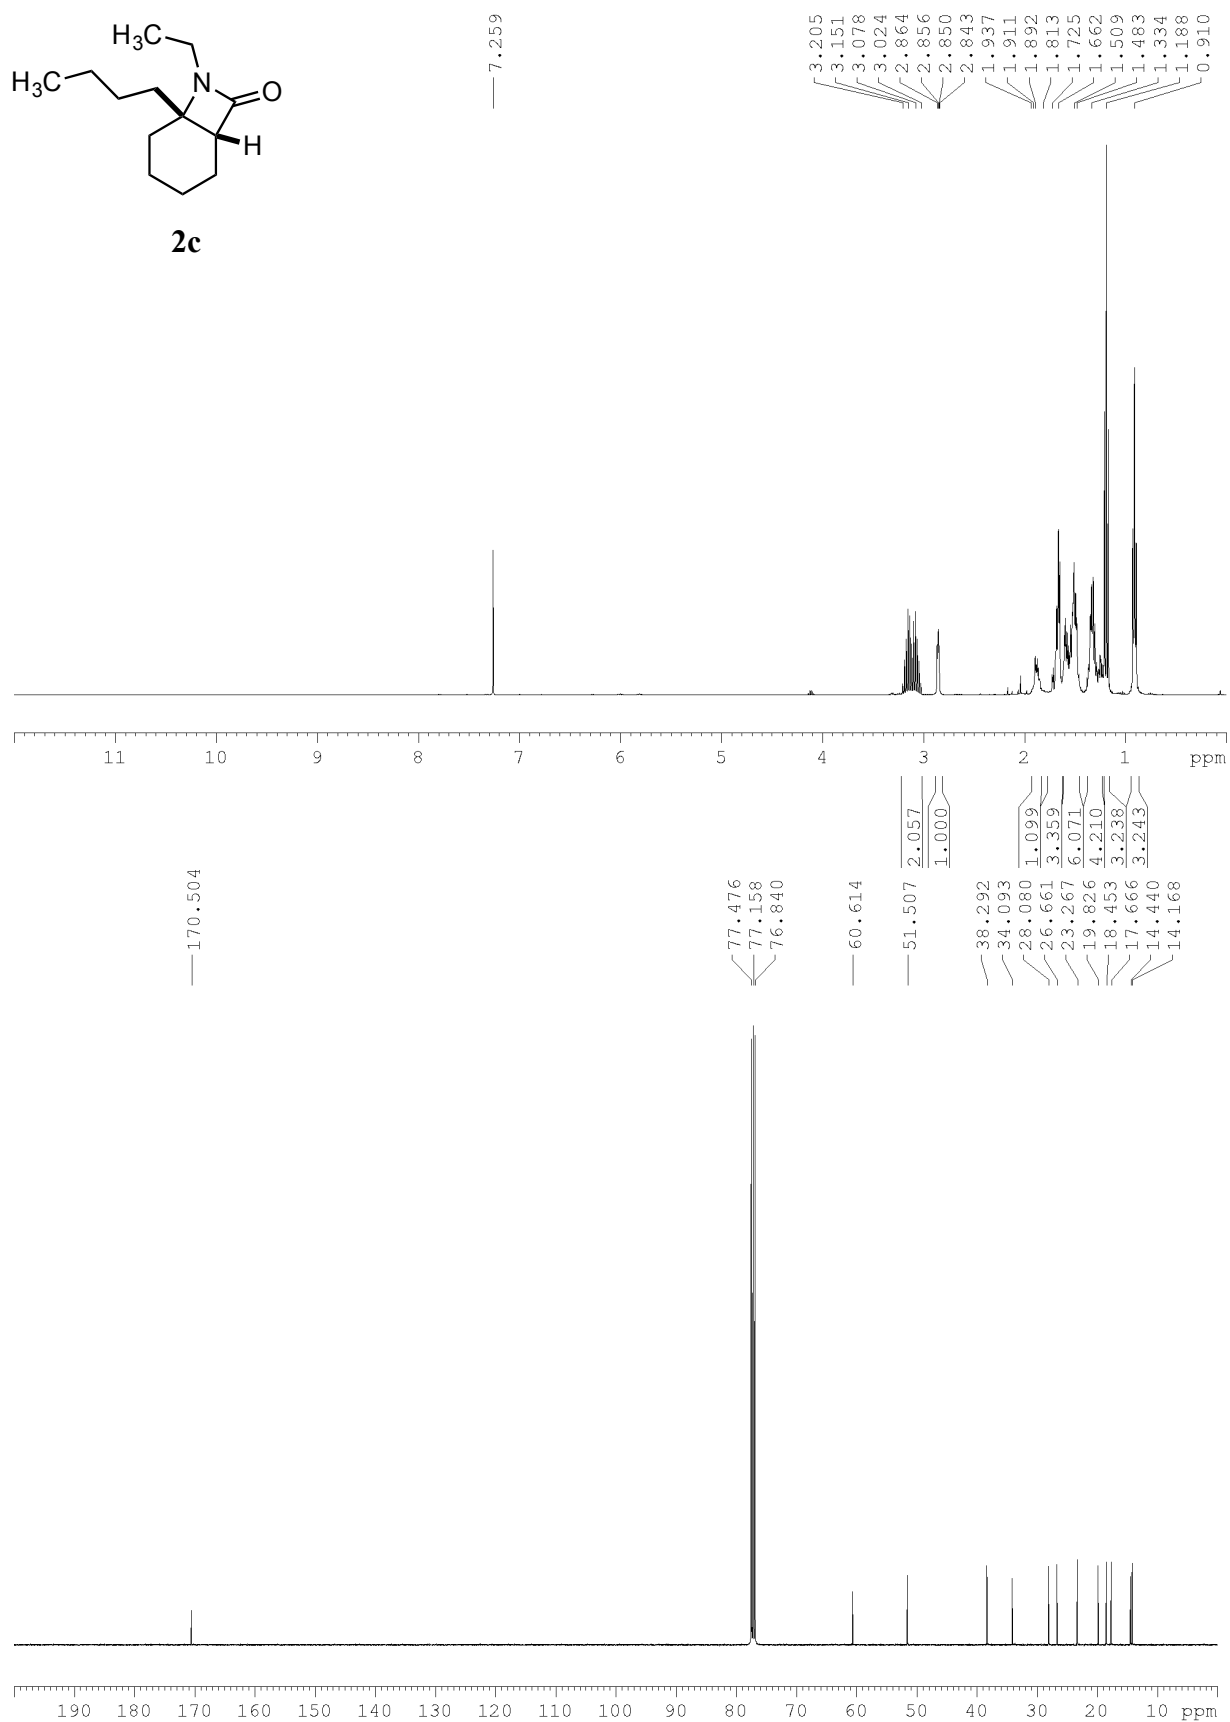

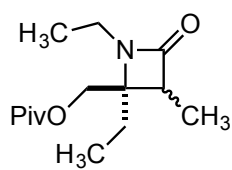

**2d**

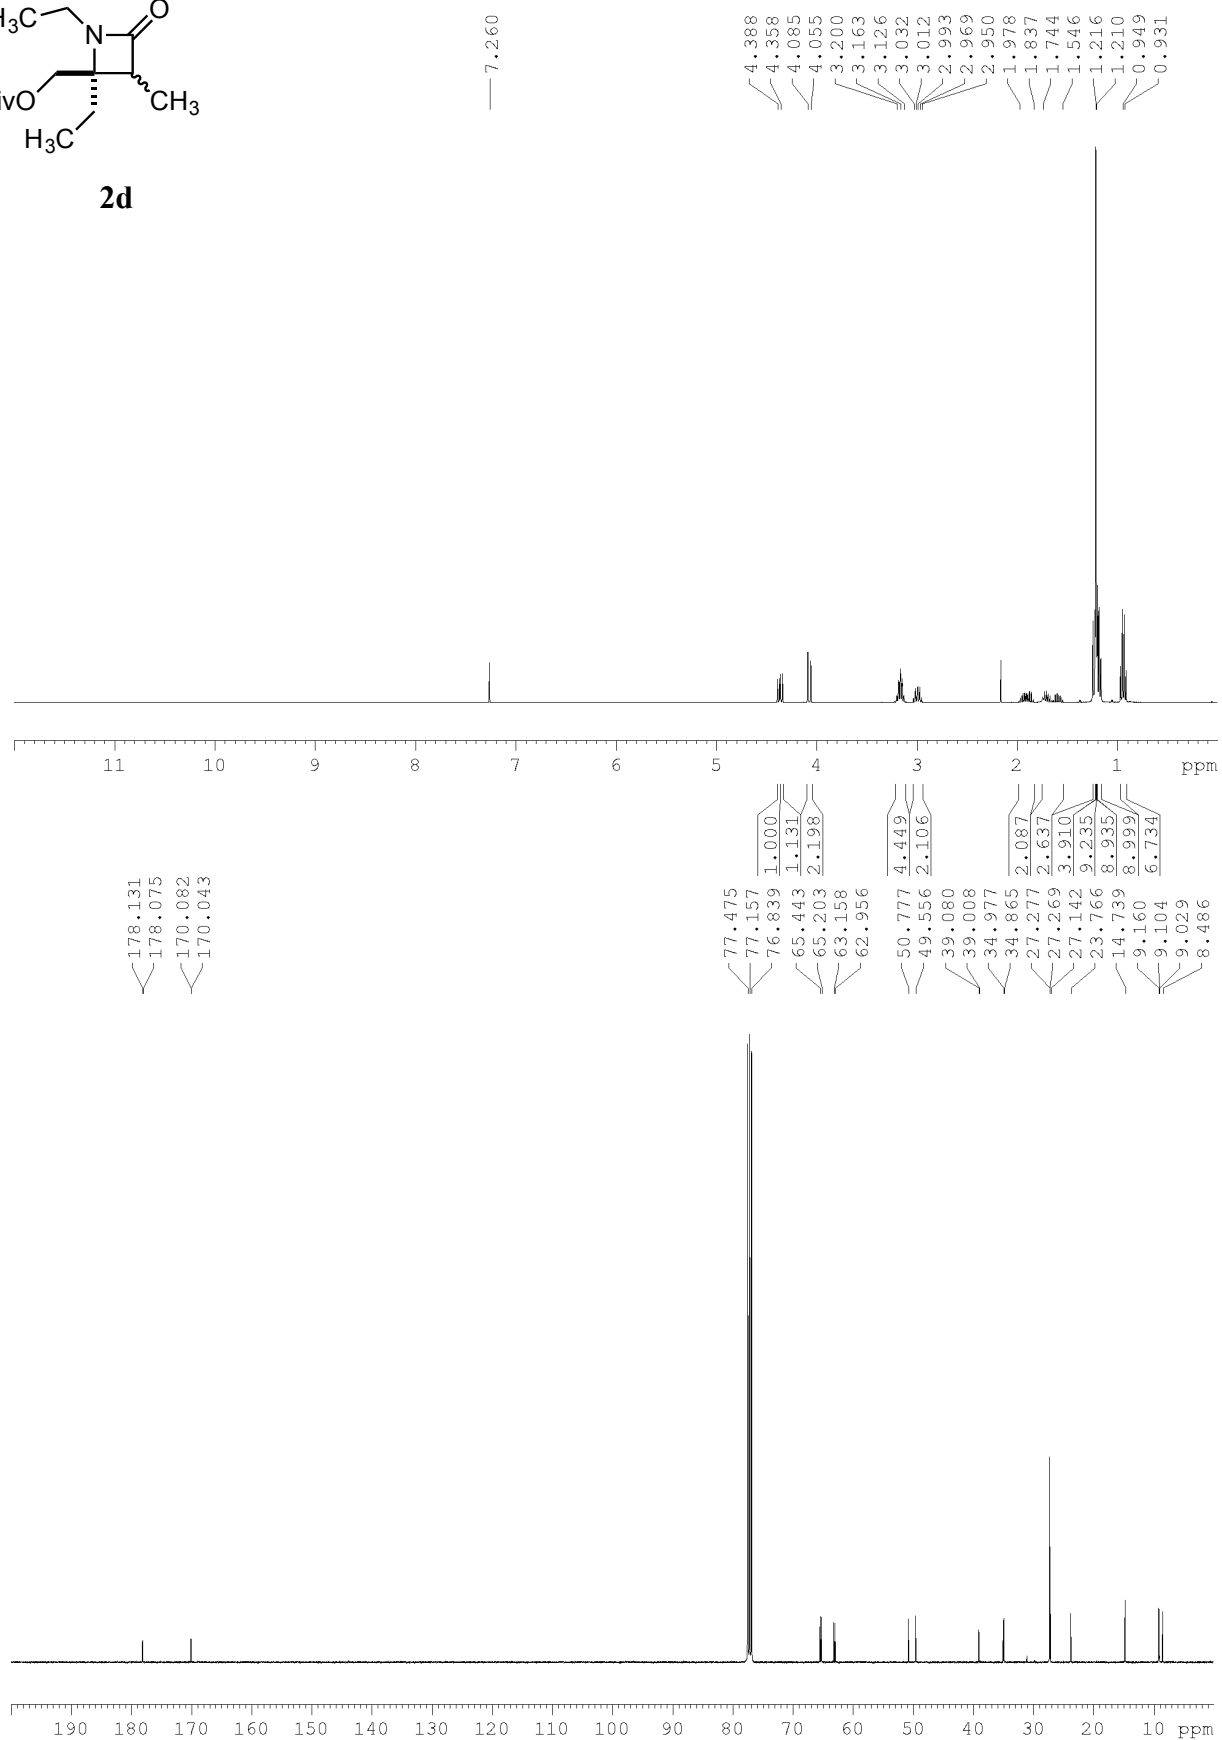

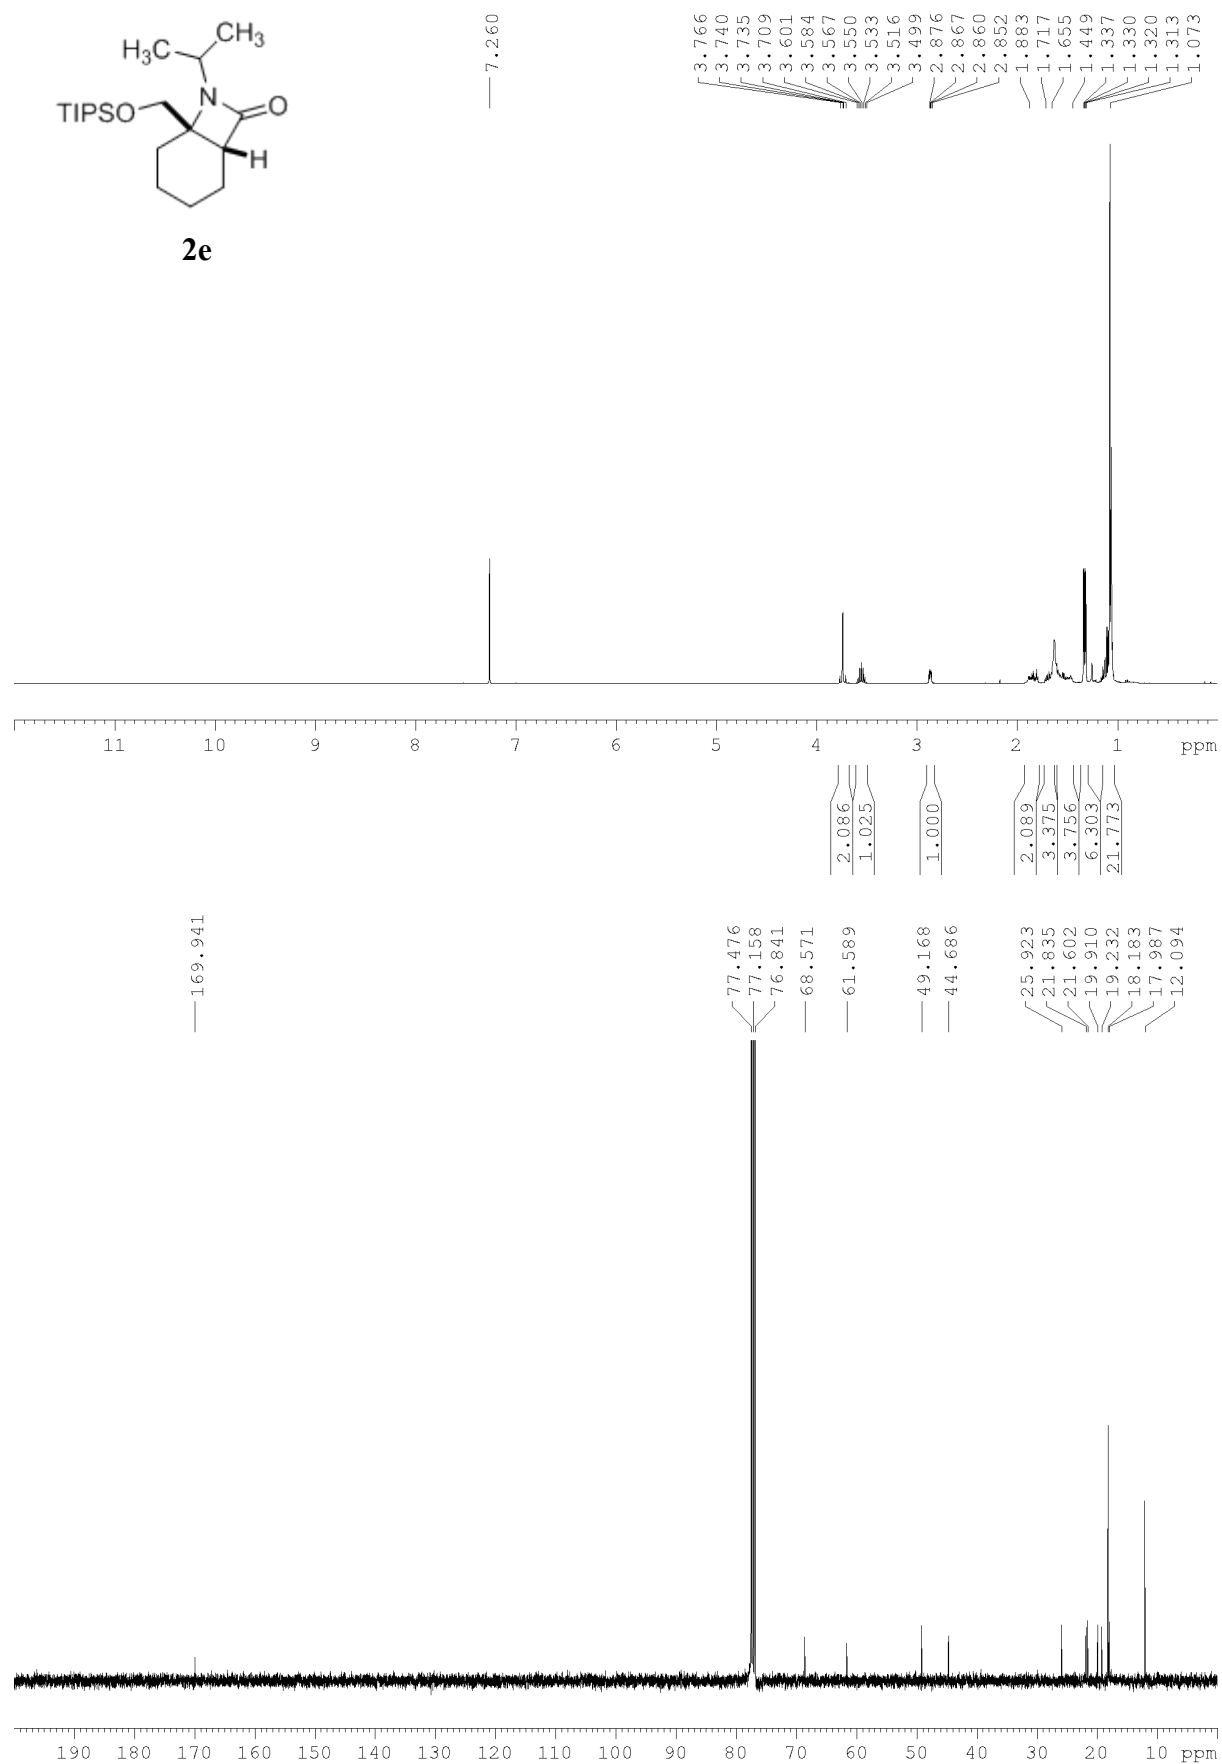

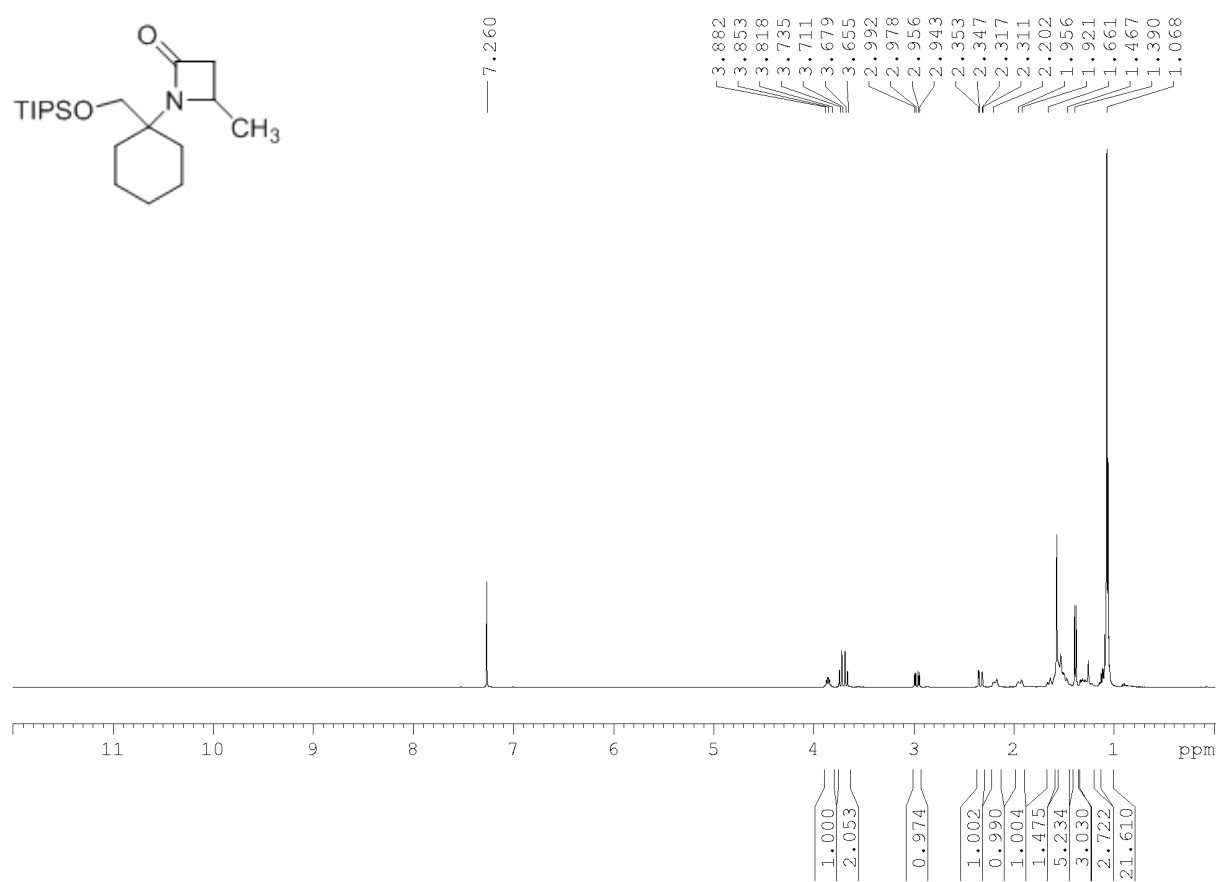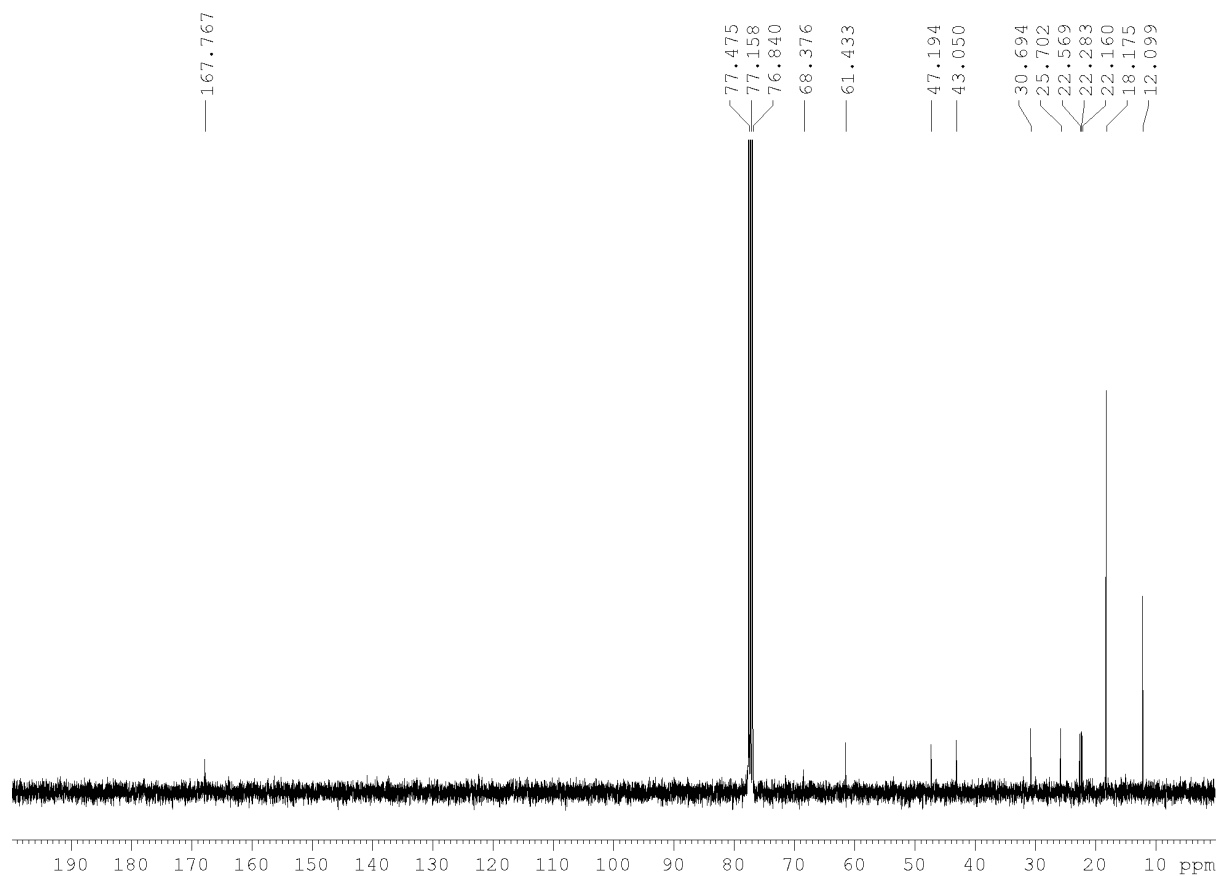

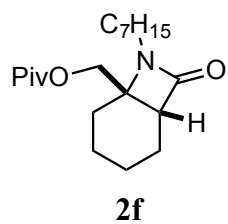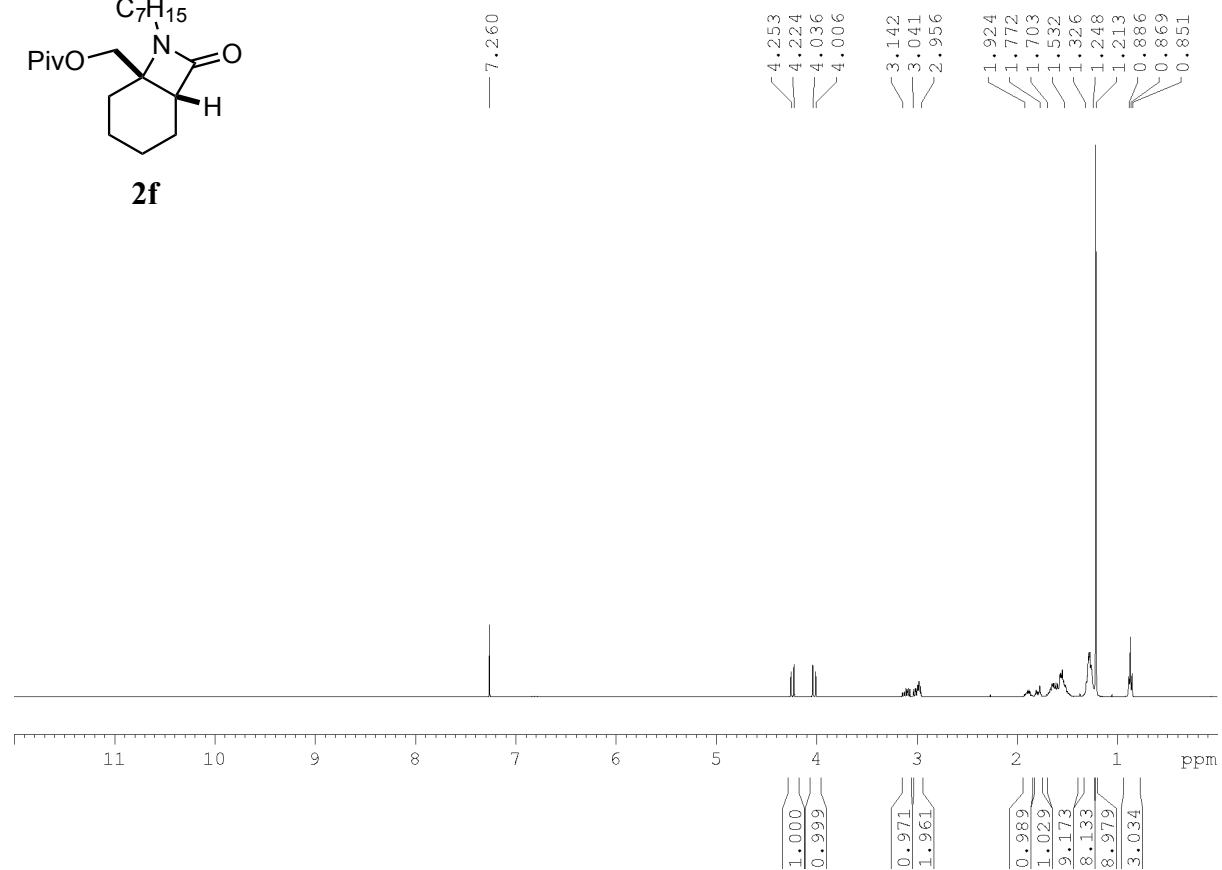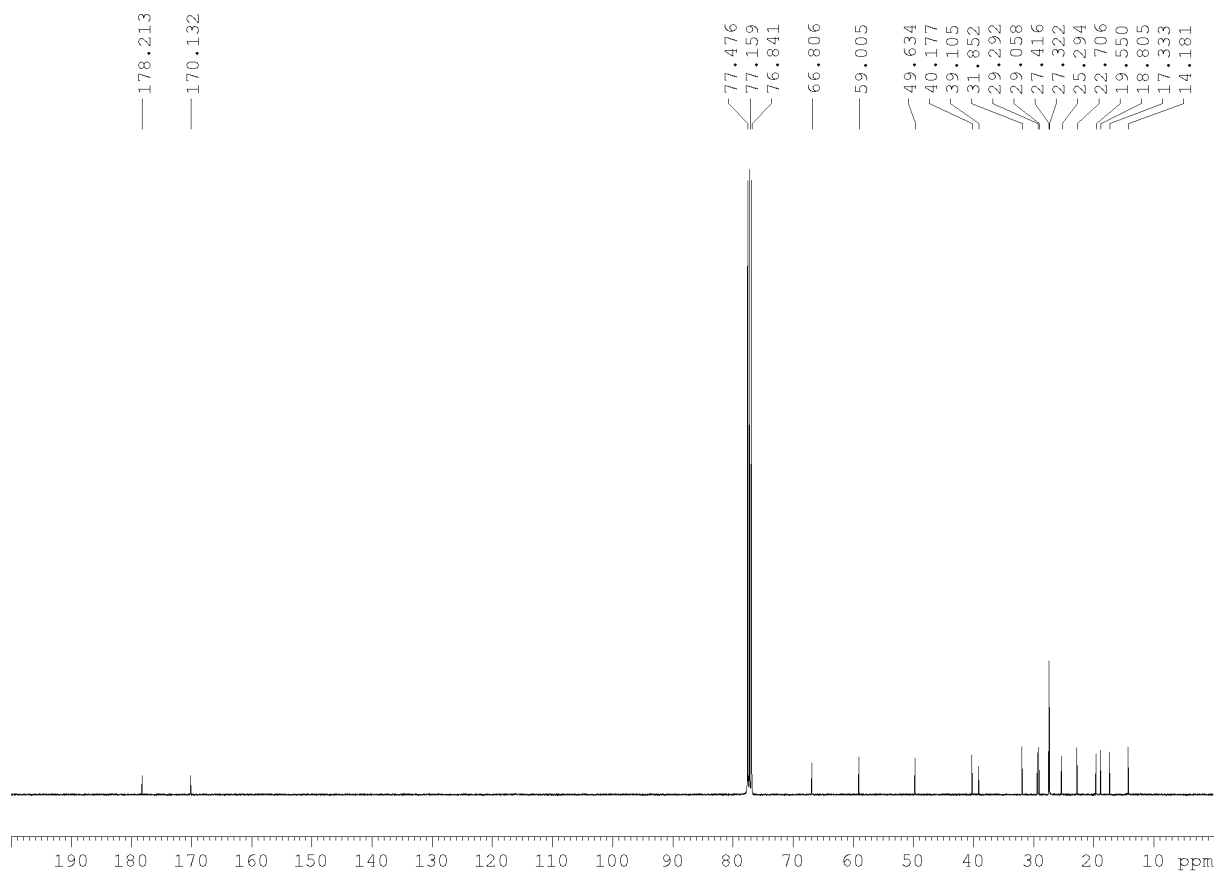

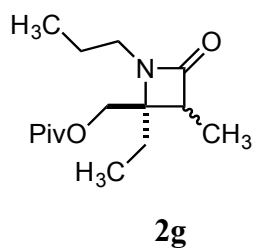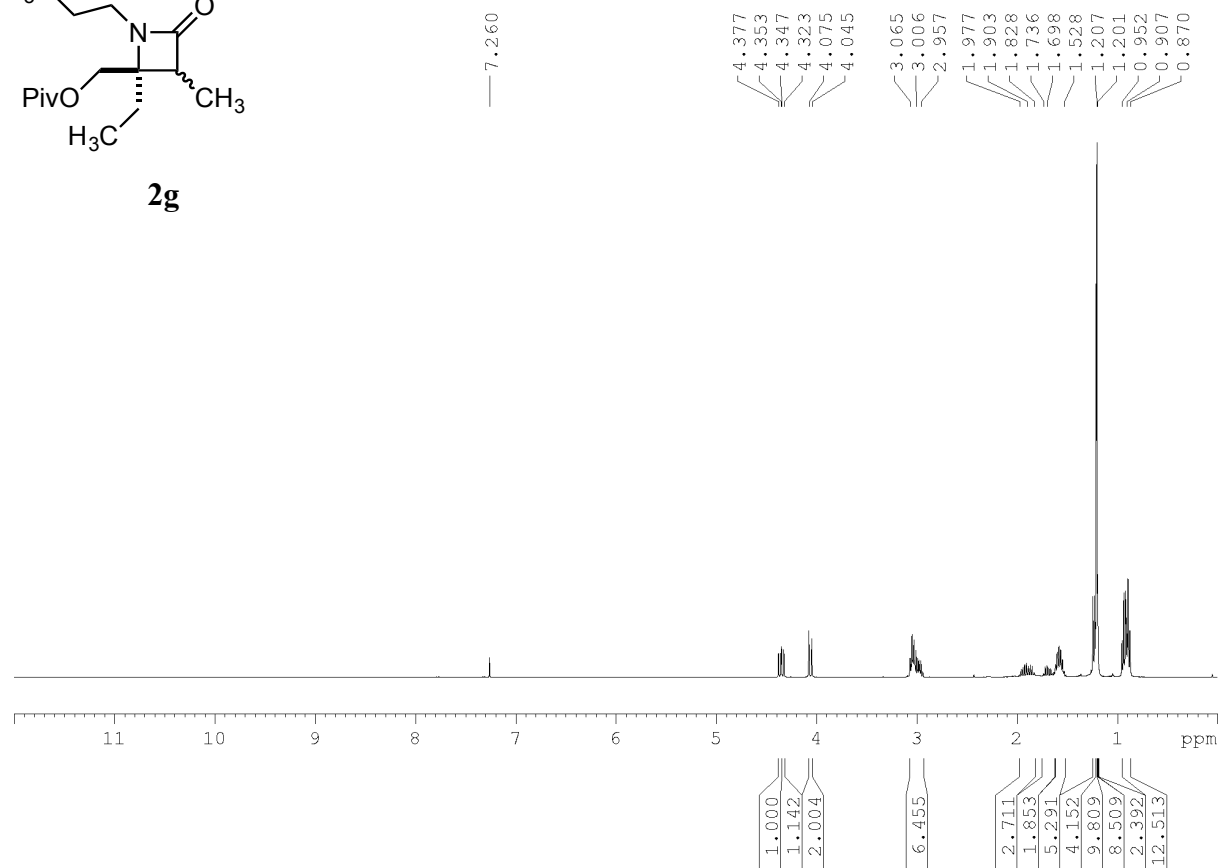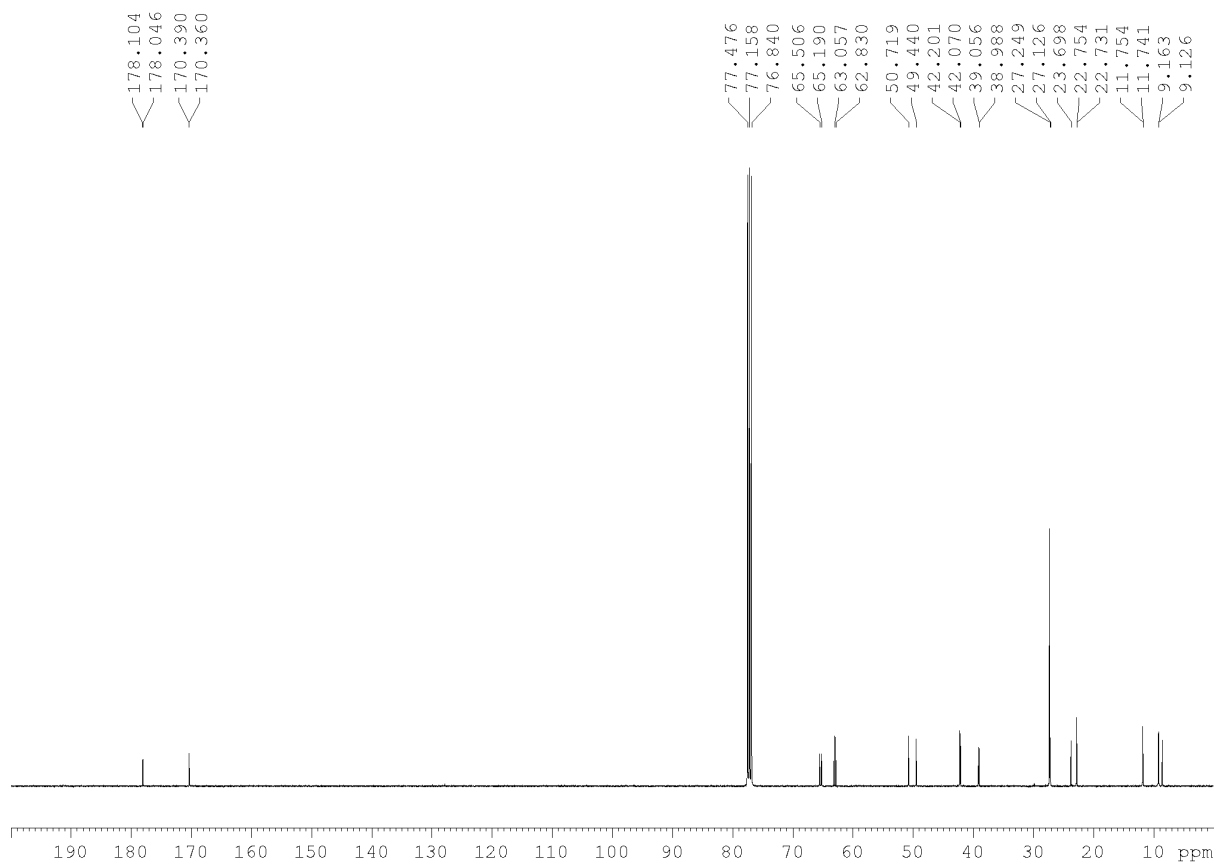

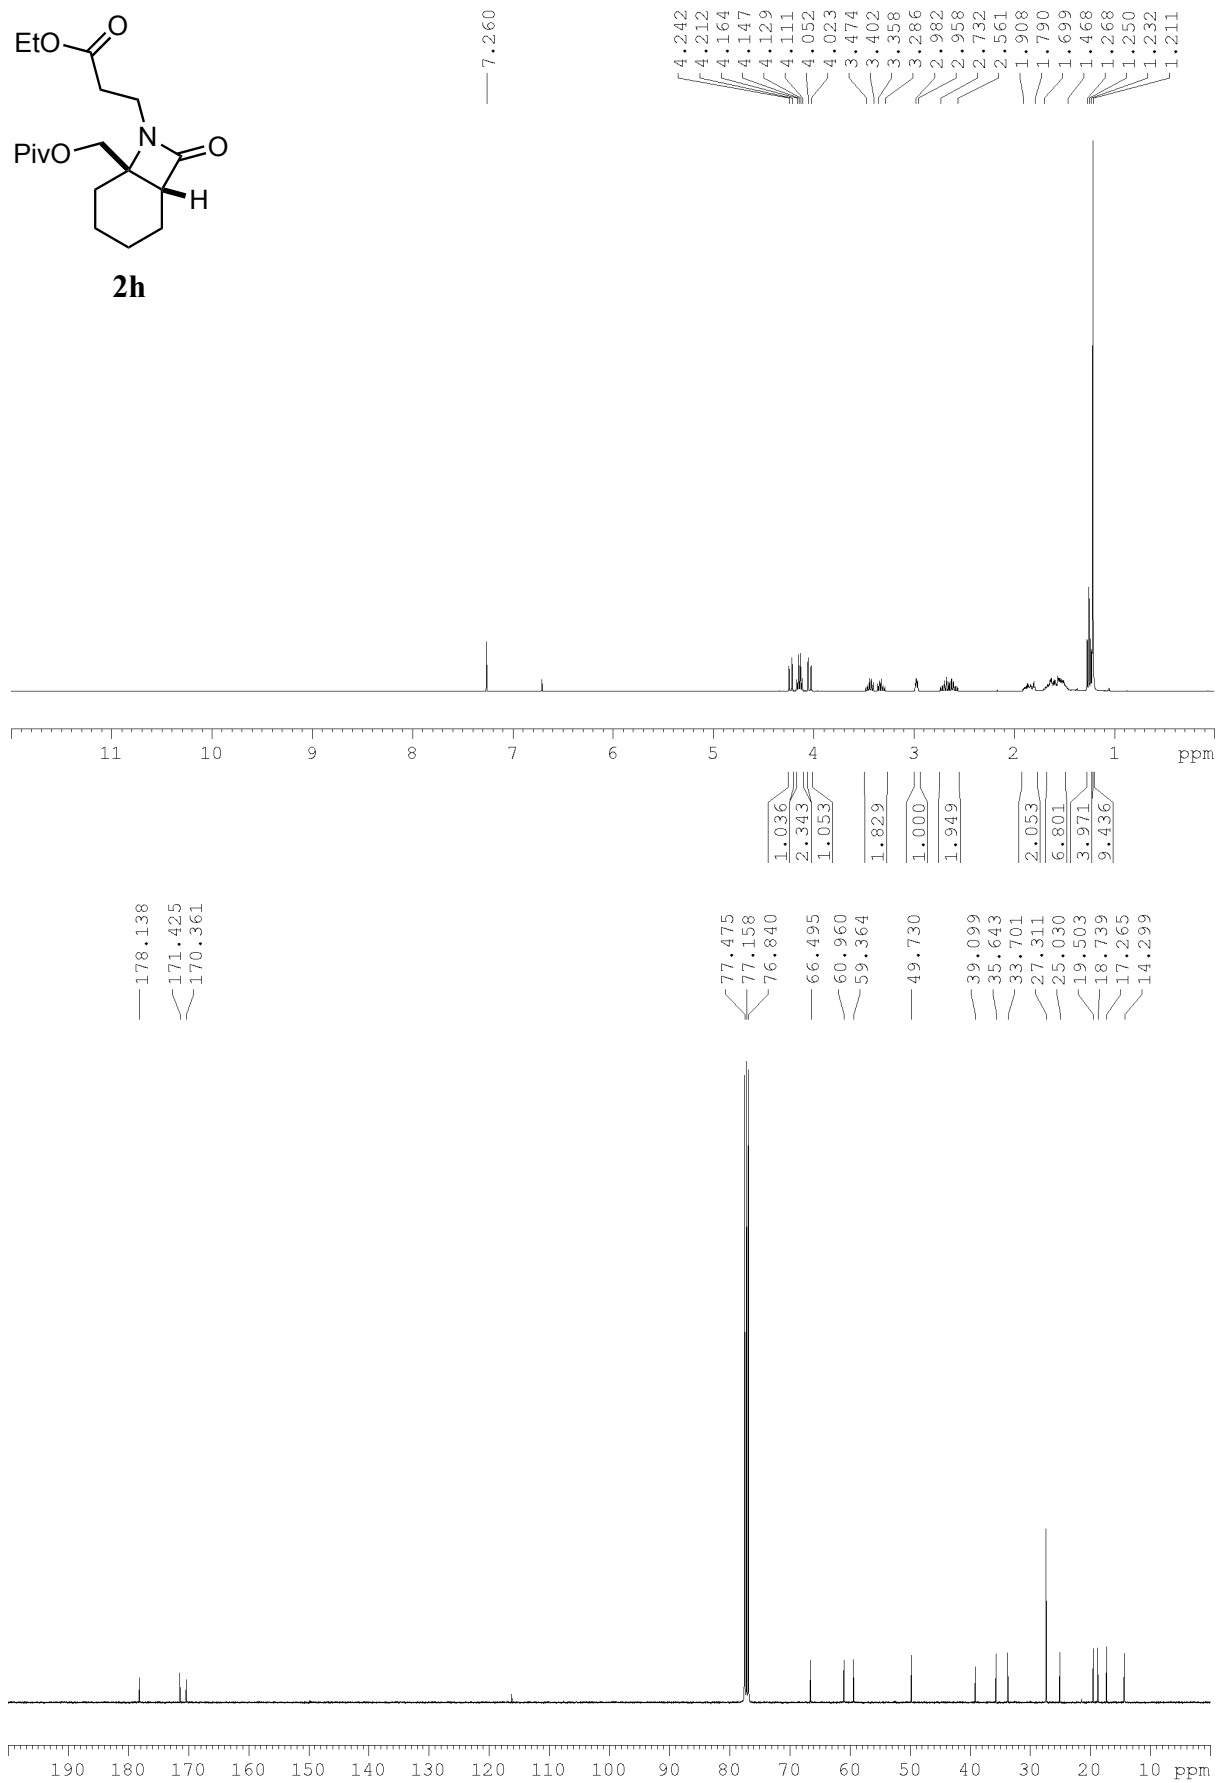

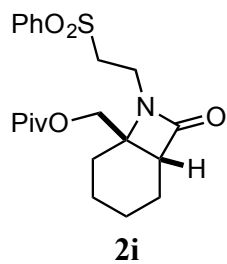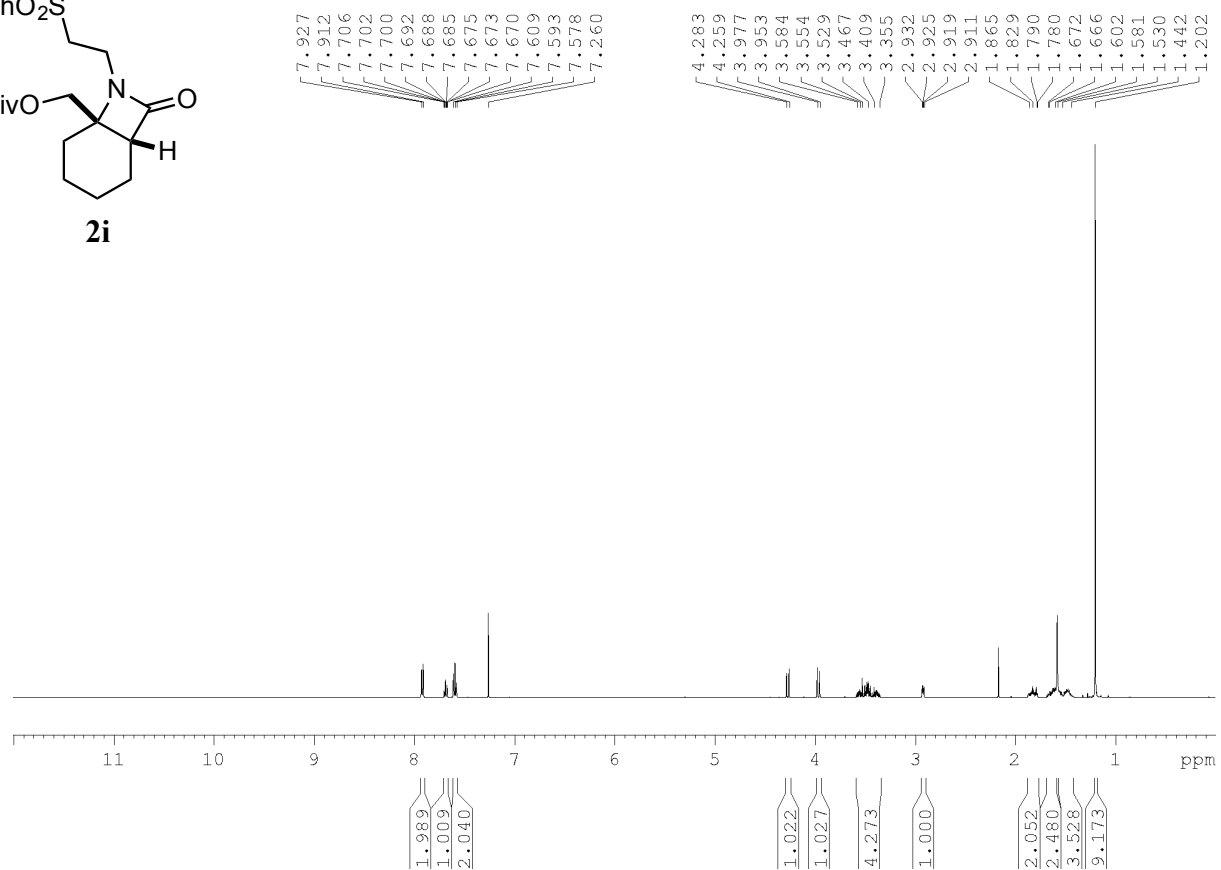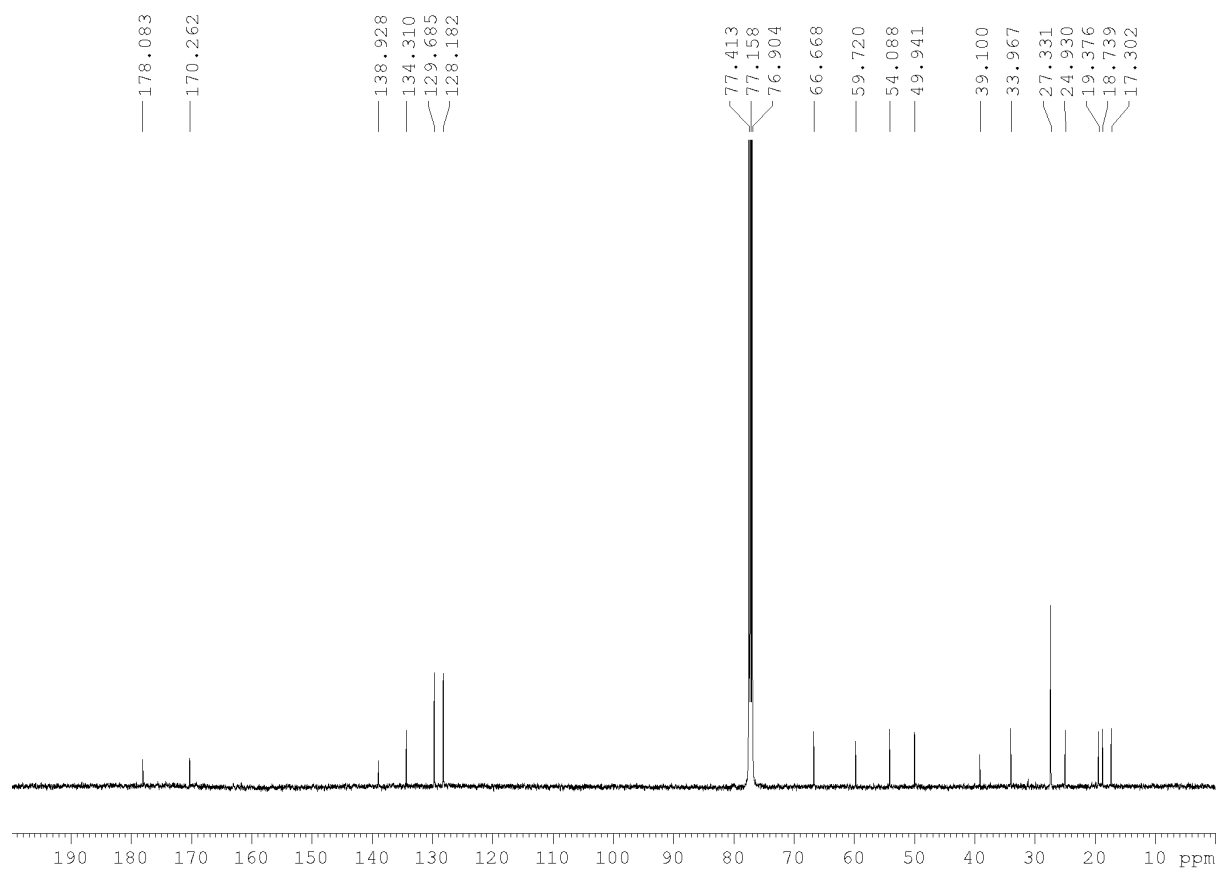

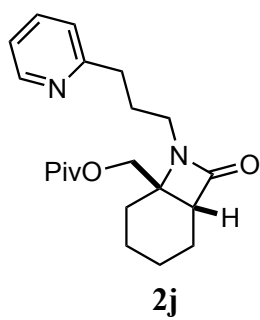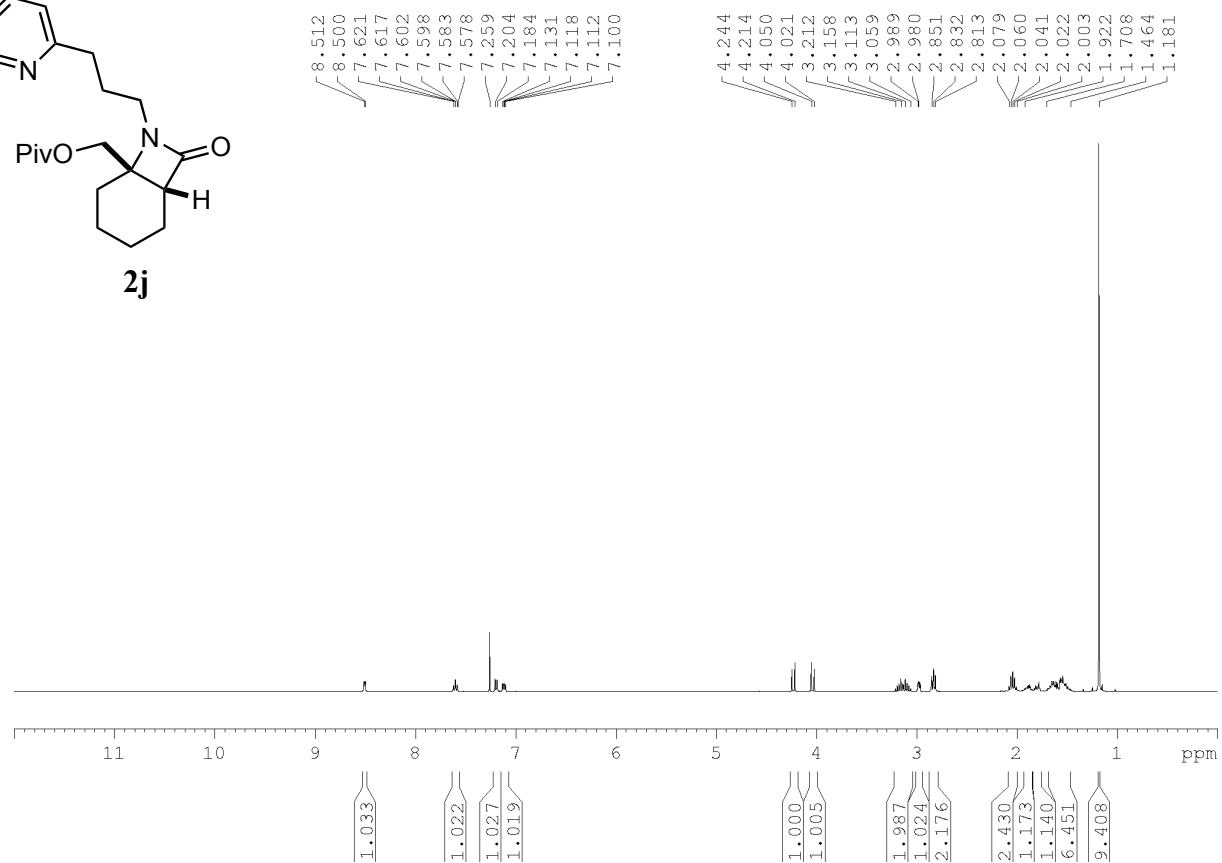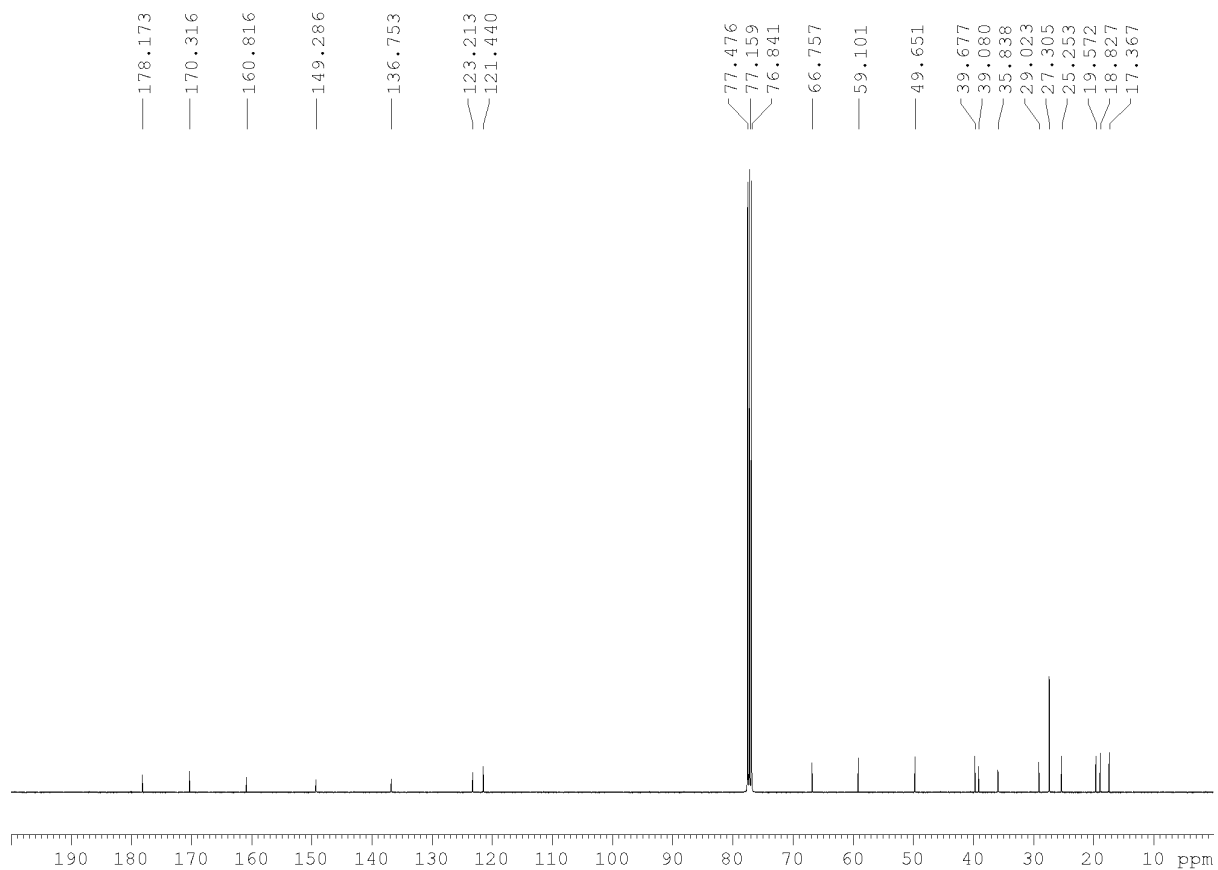

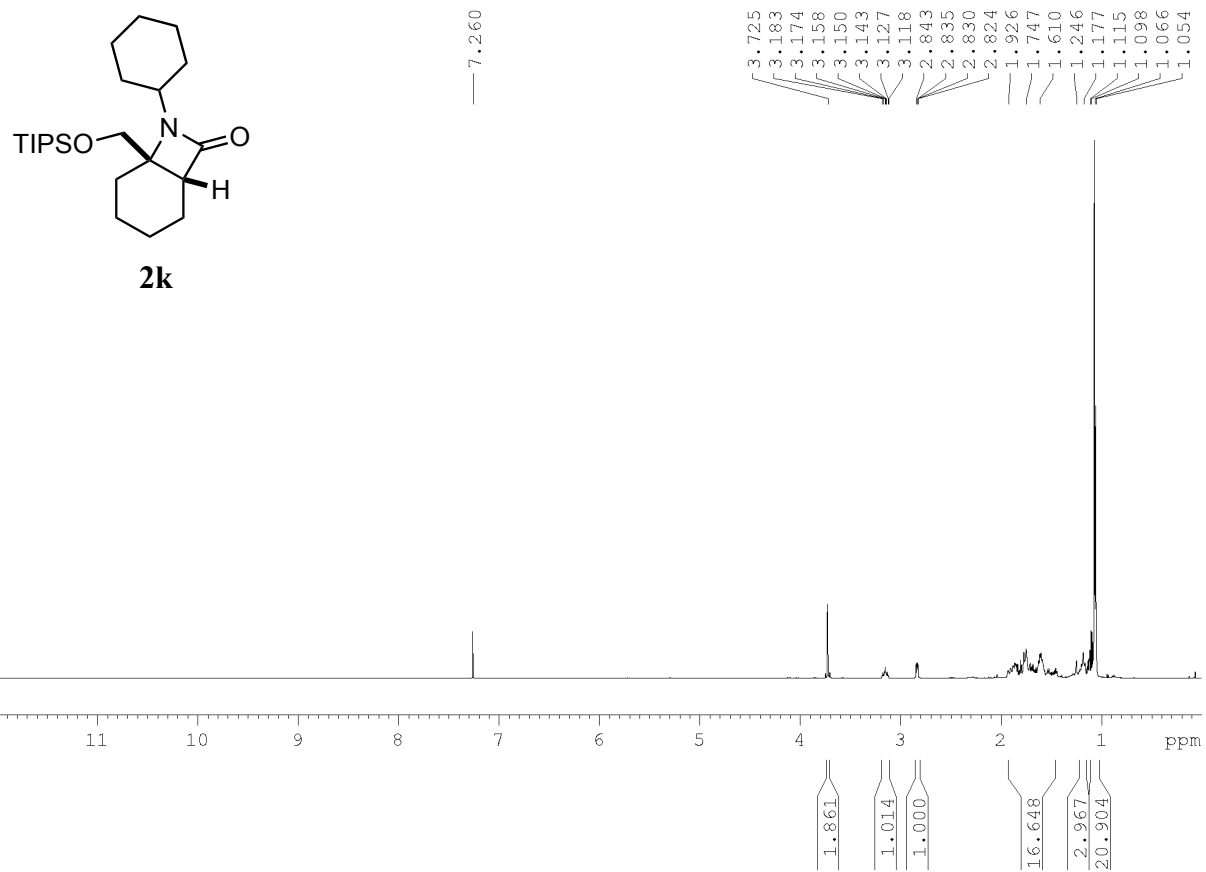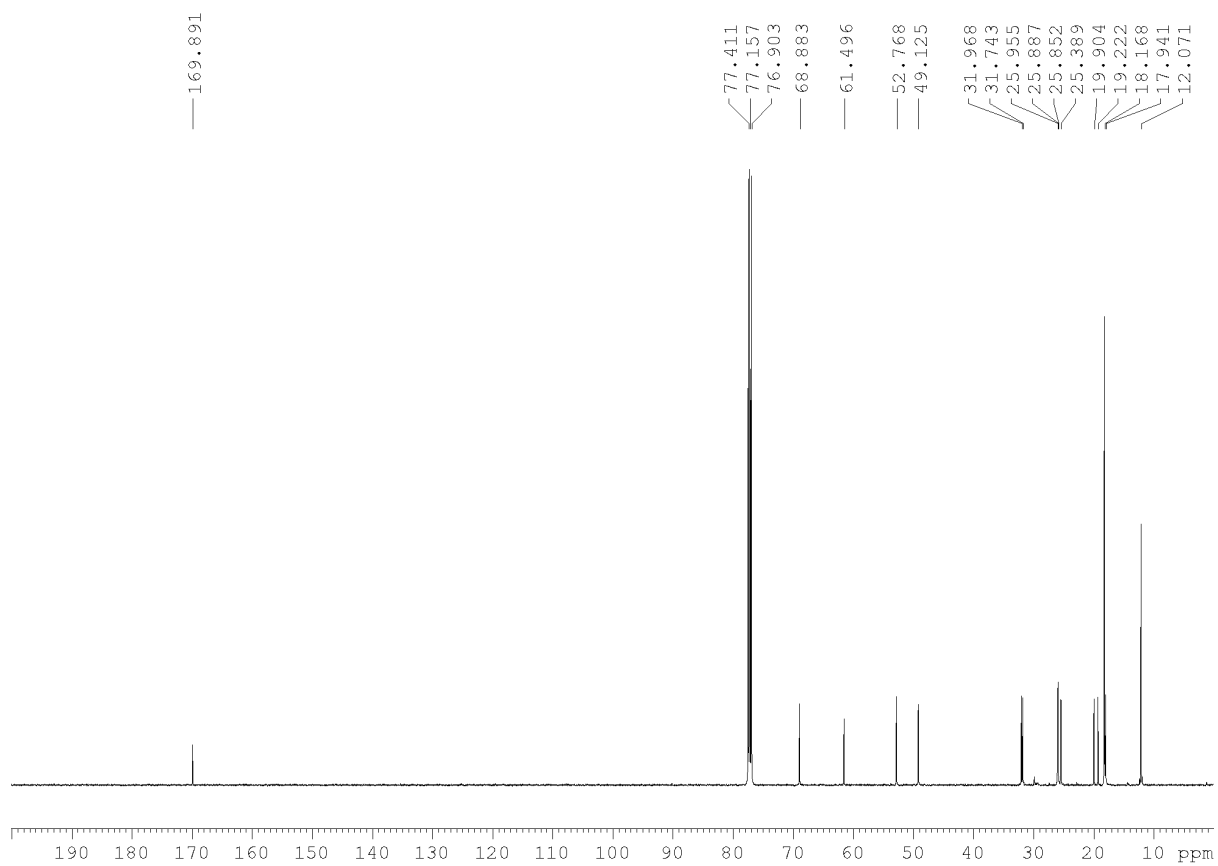

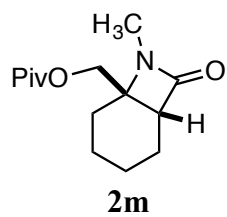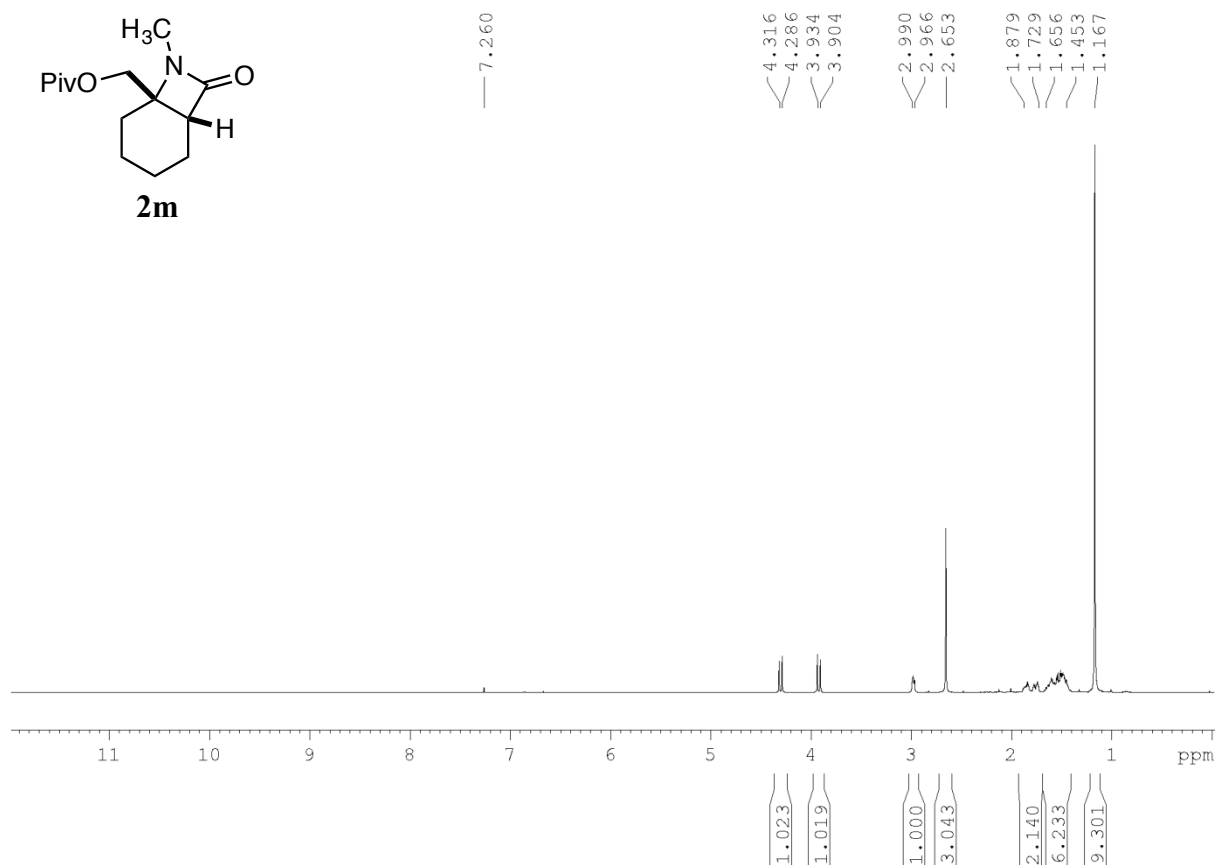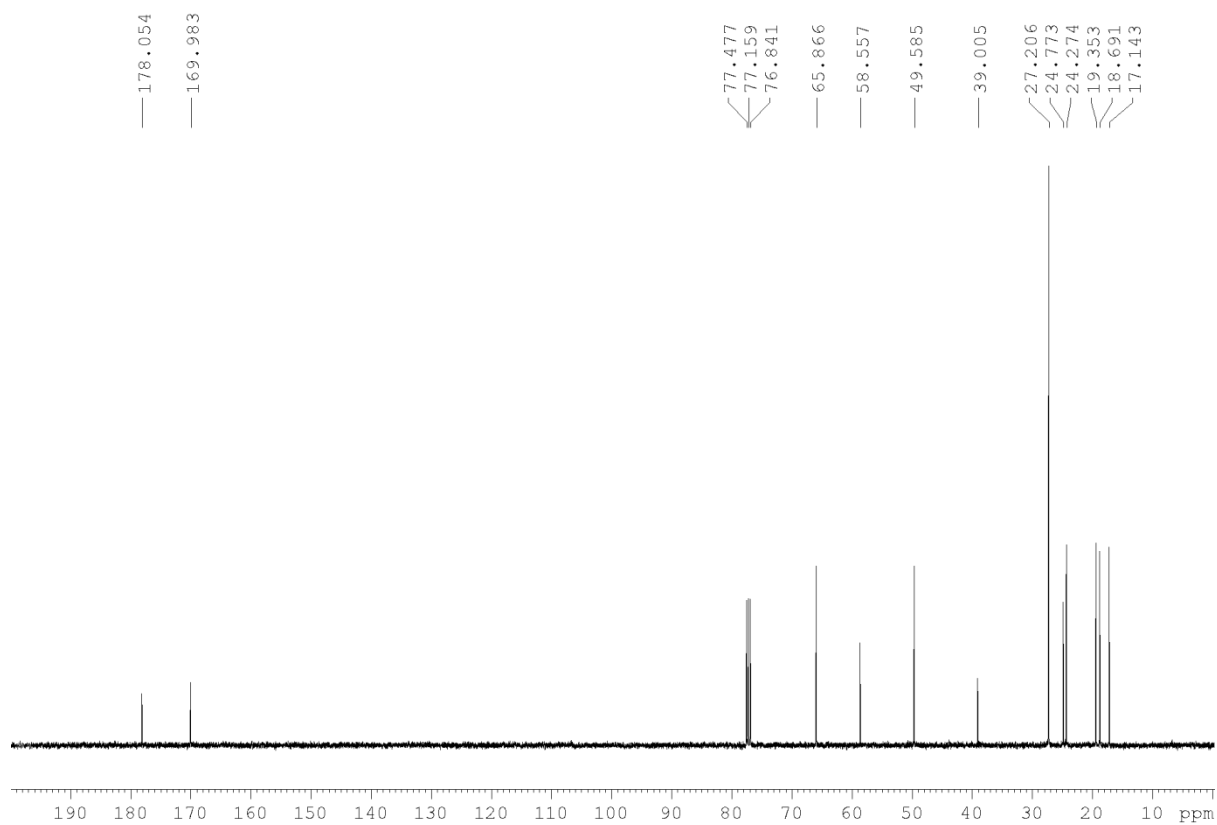

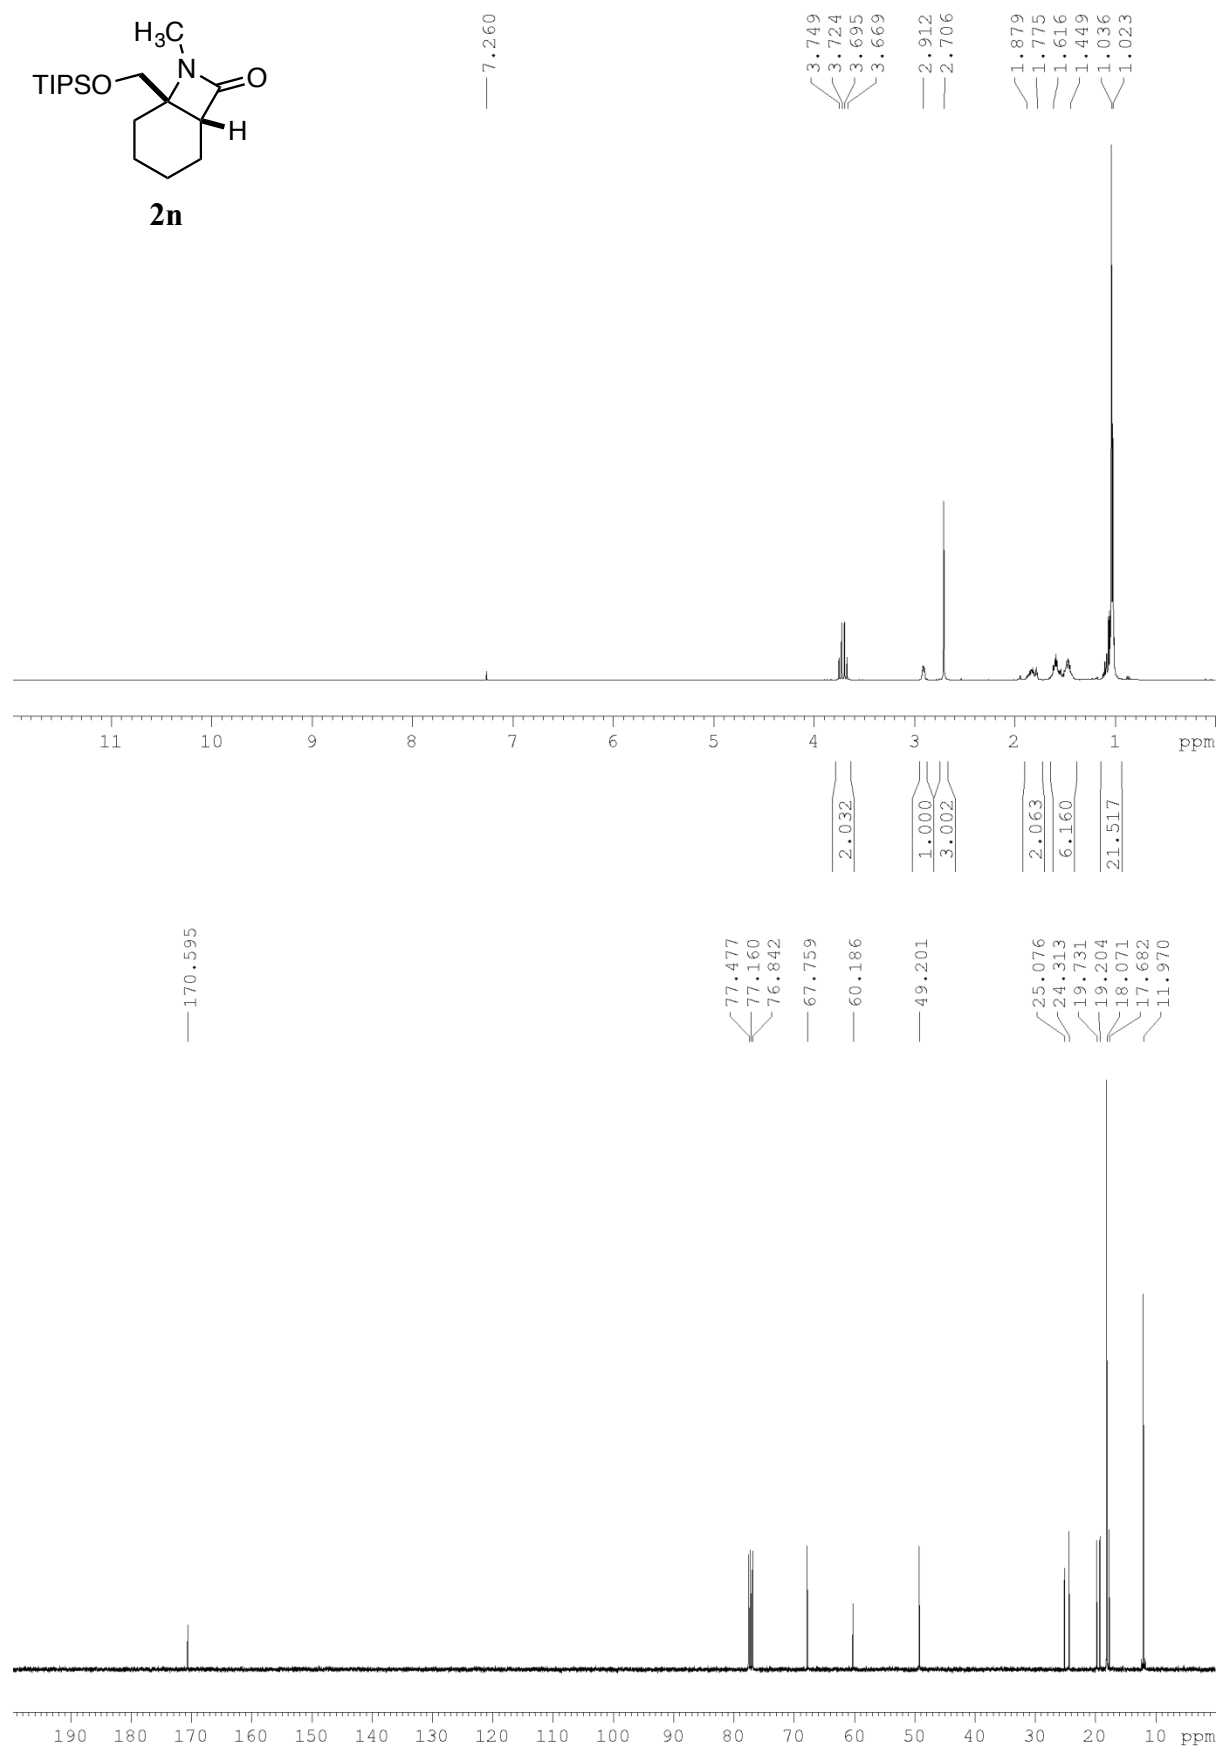

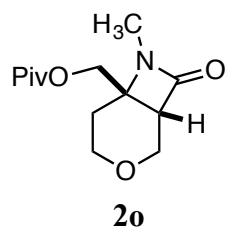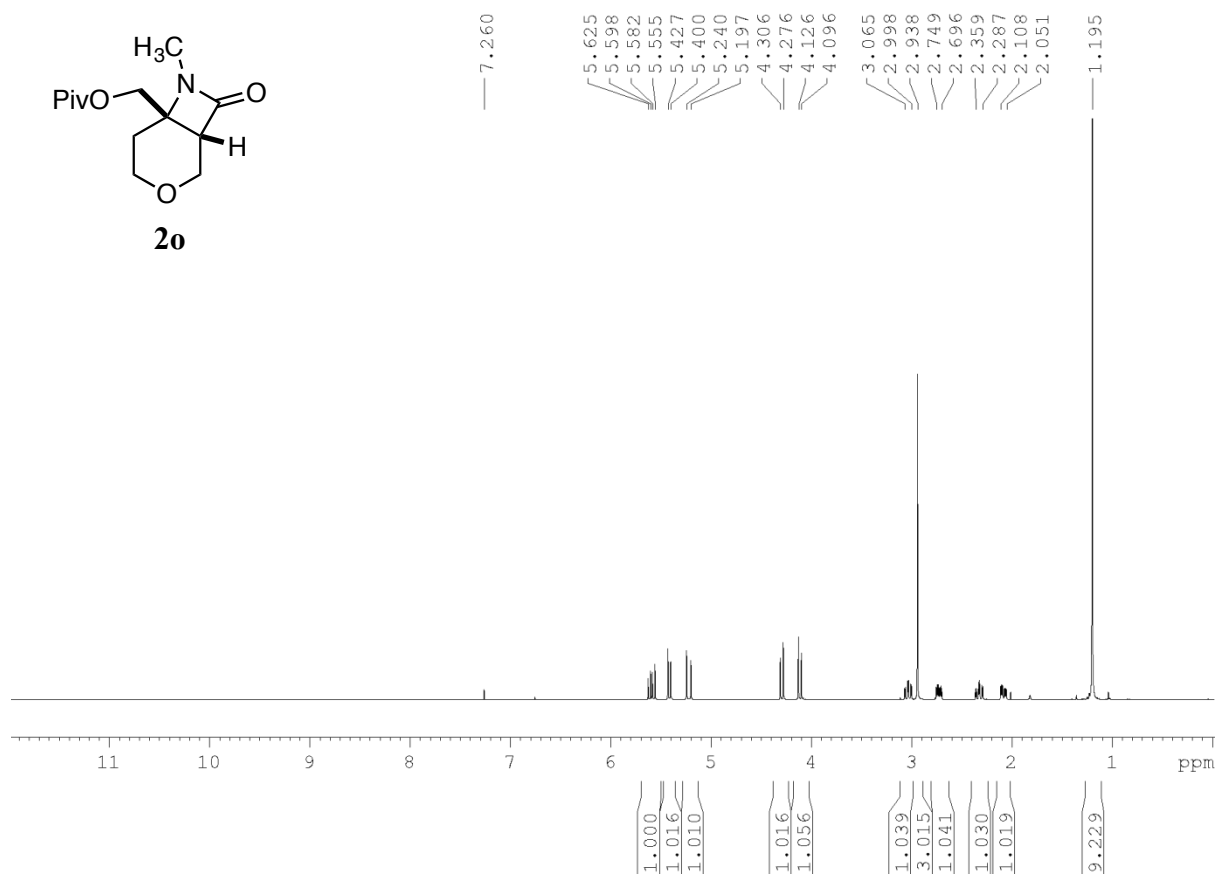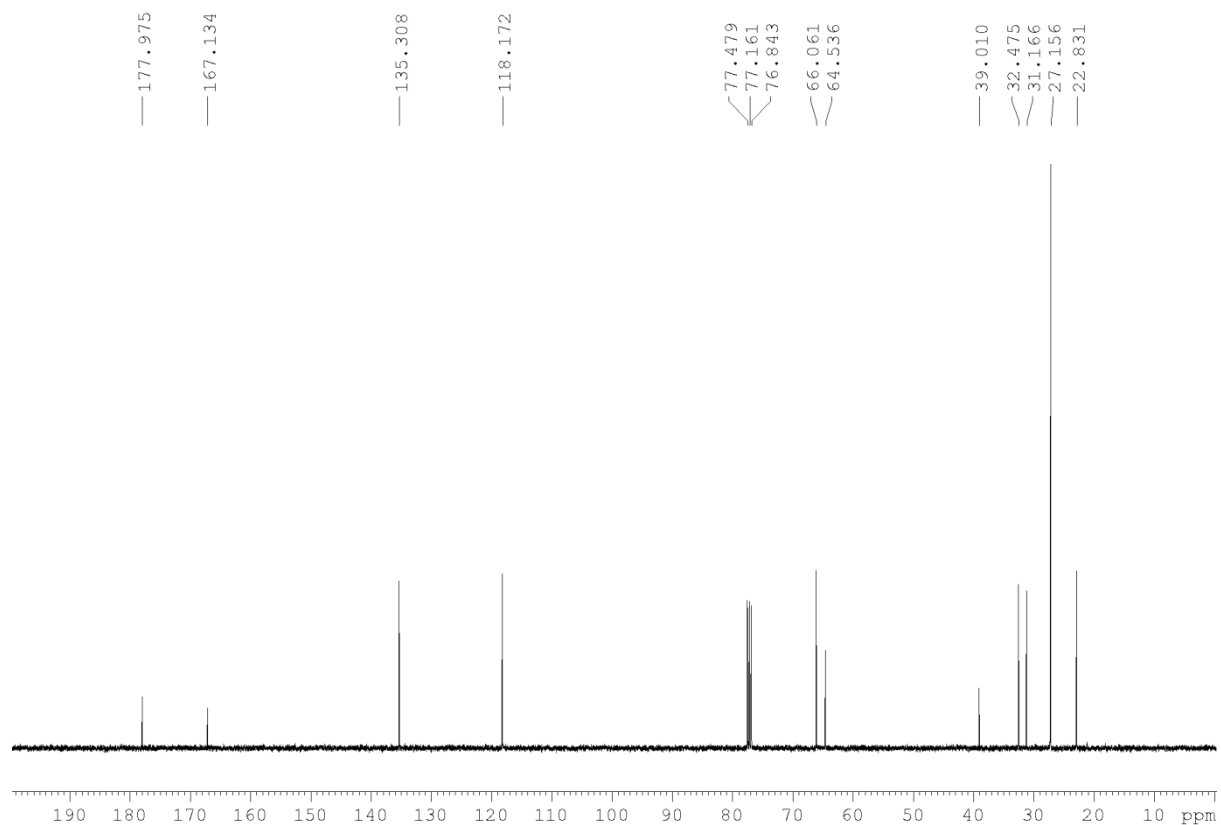

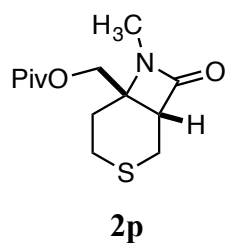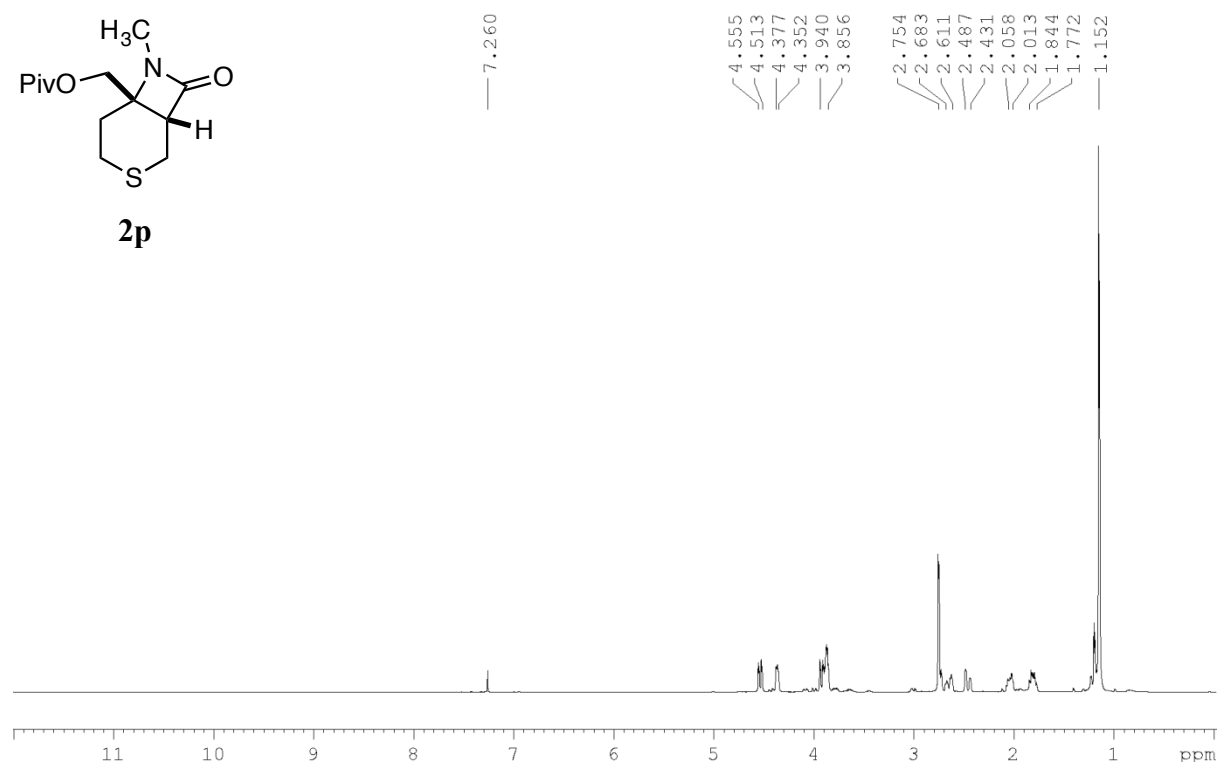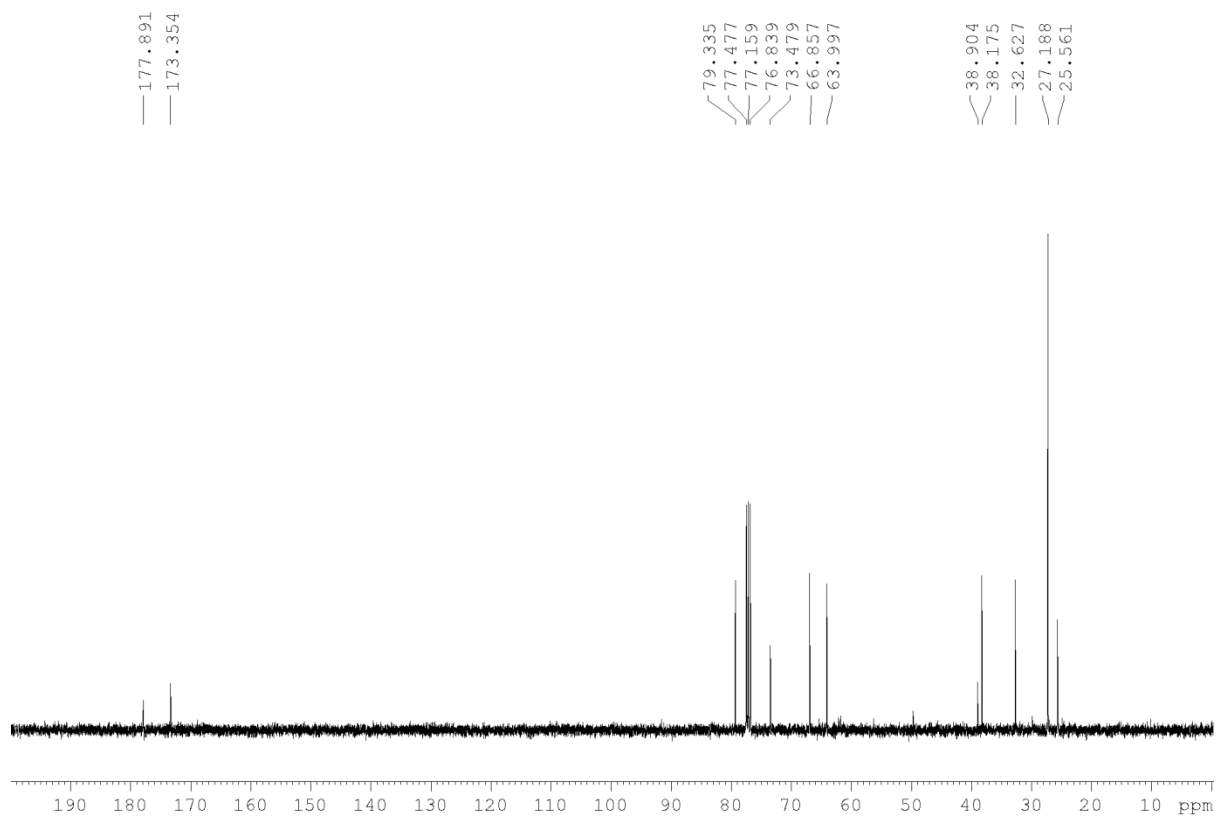

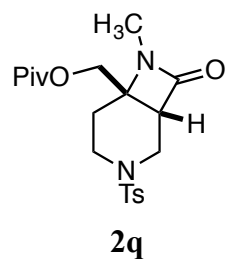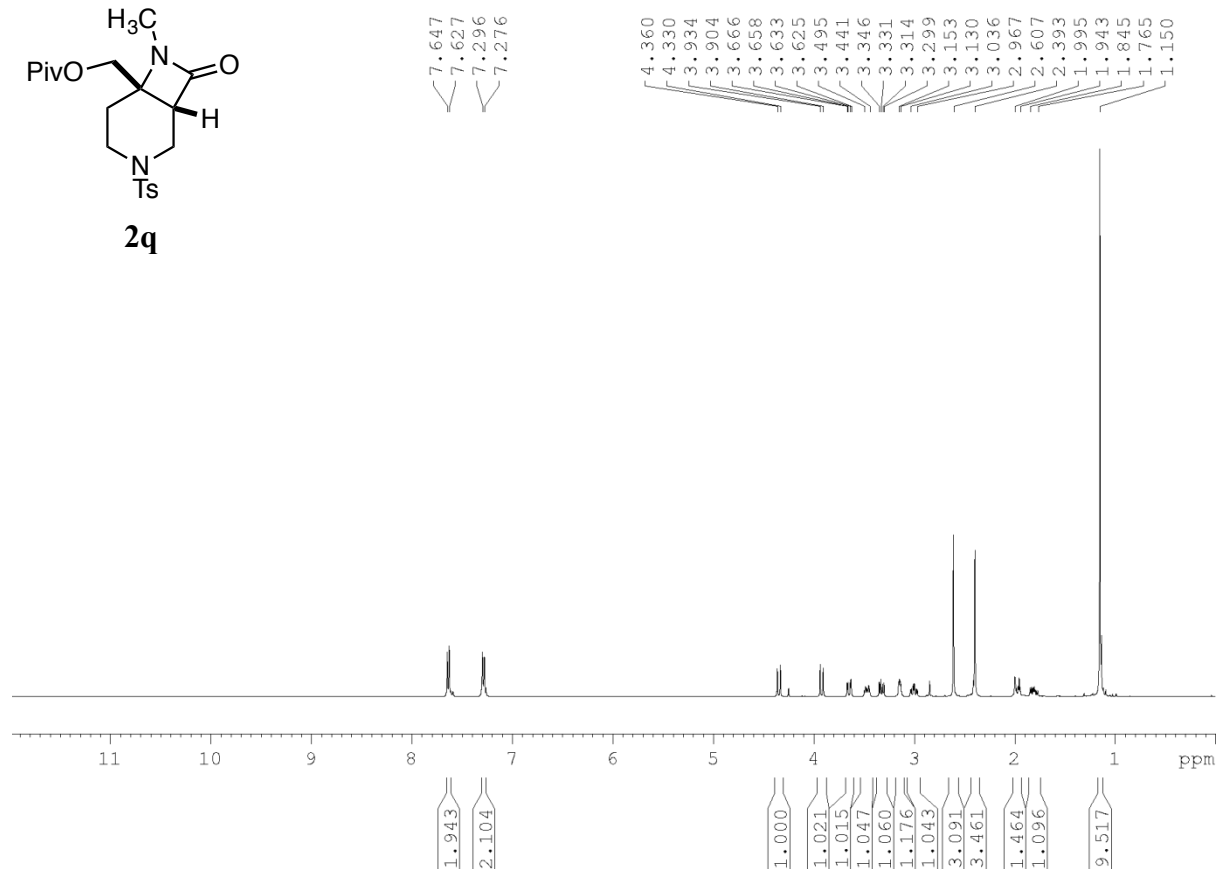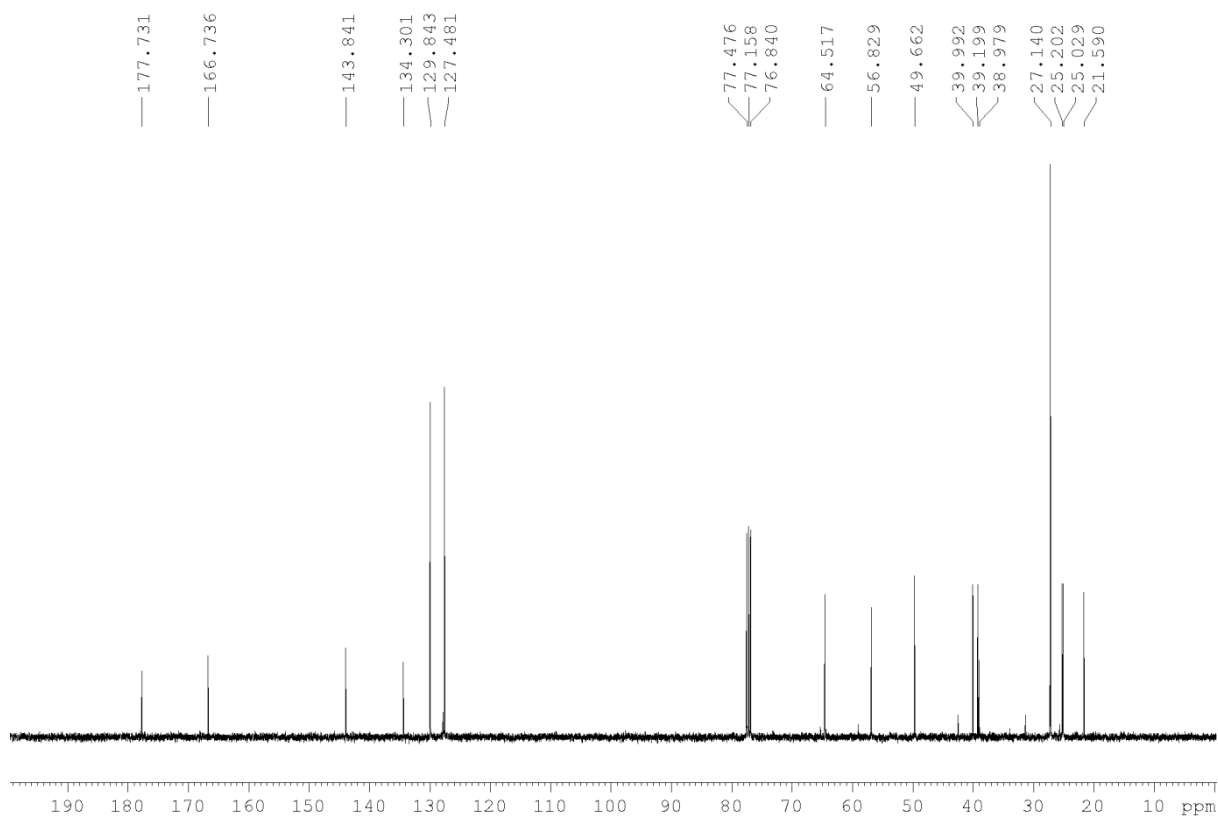

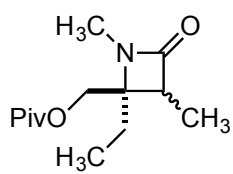

**2r**

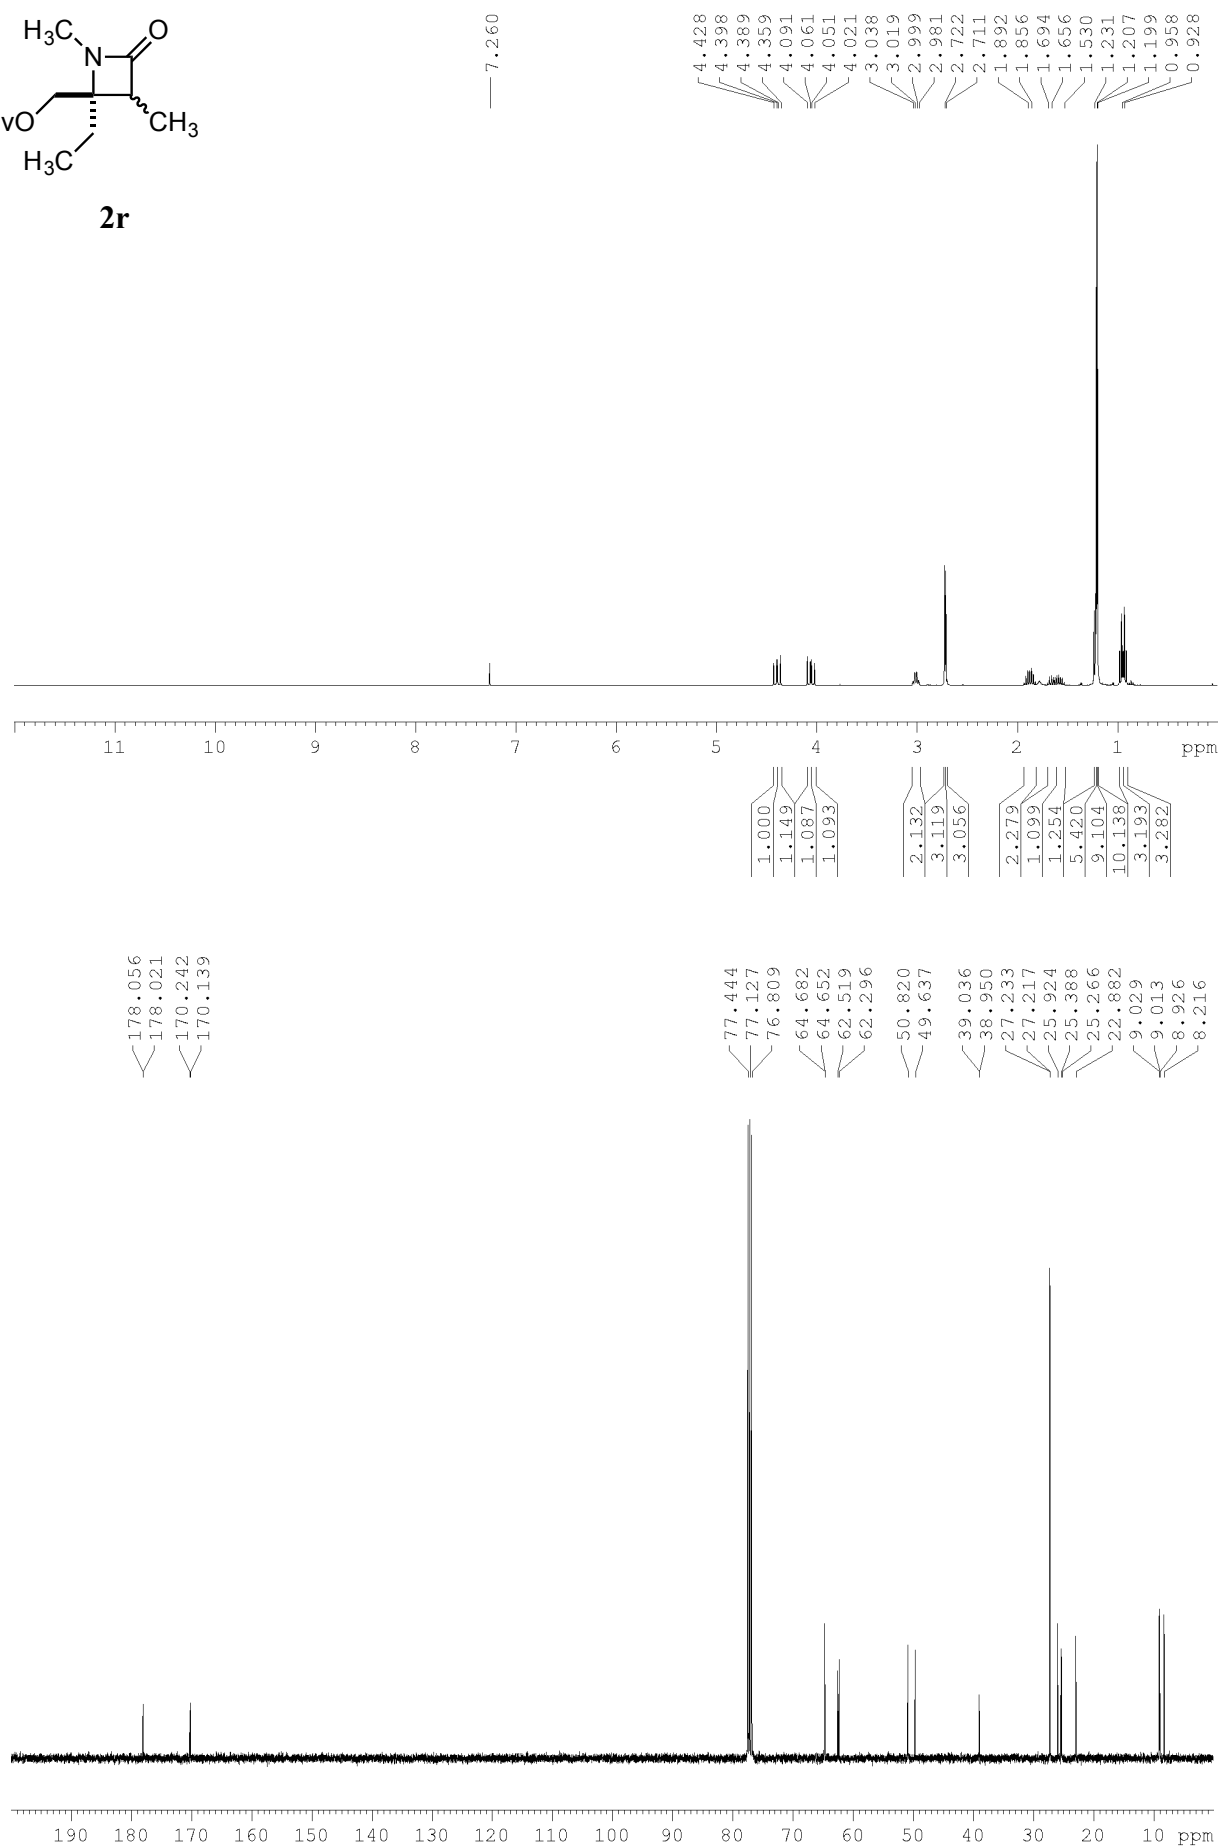

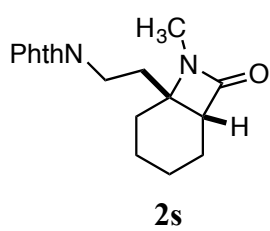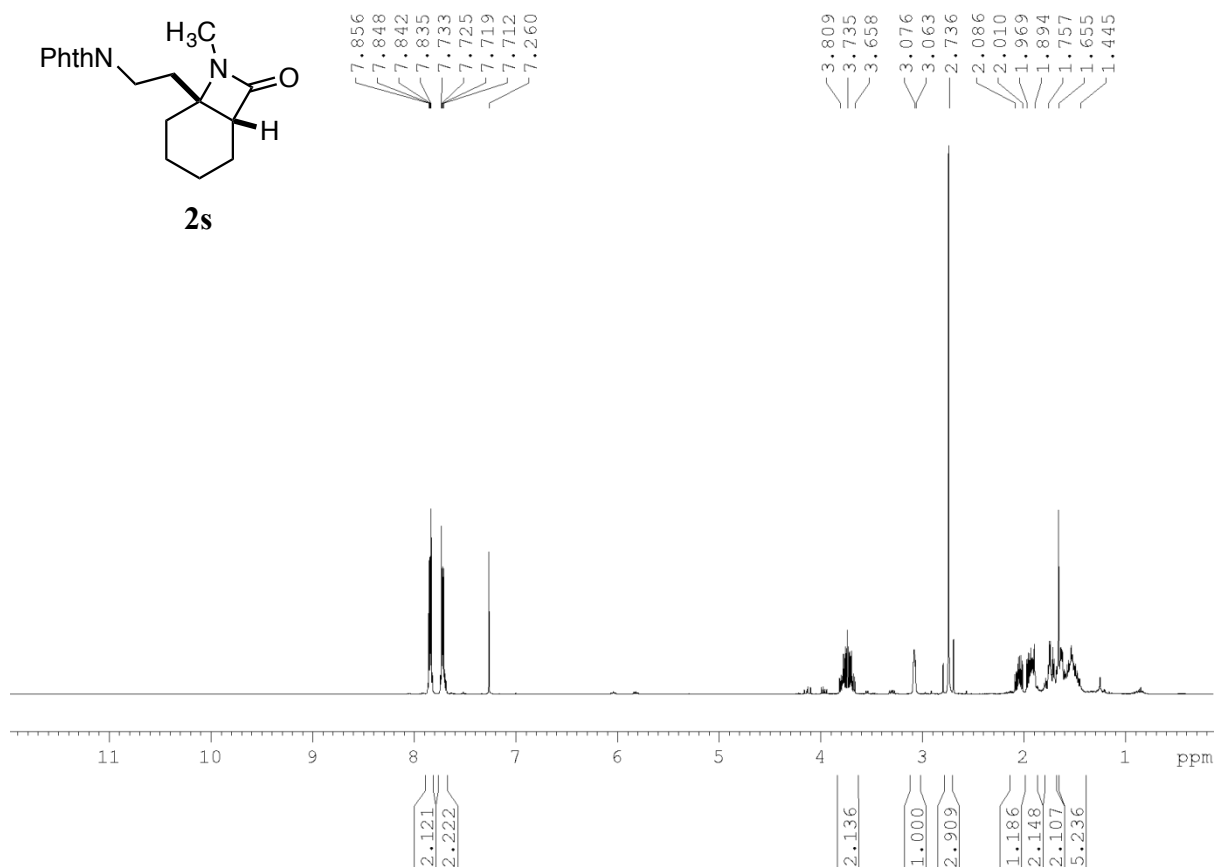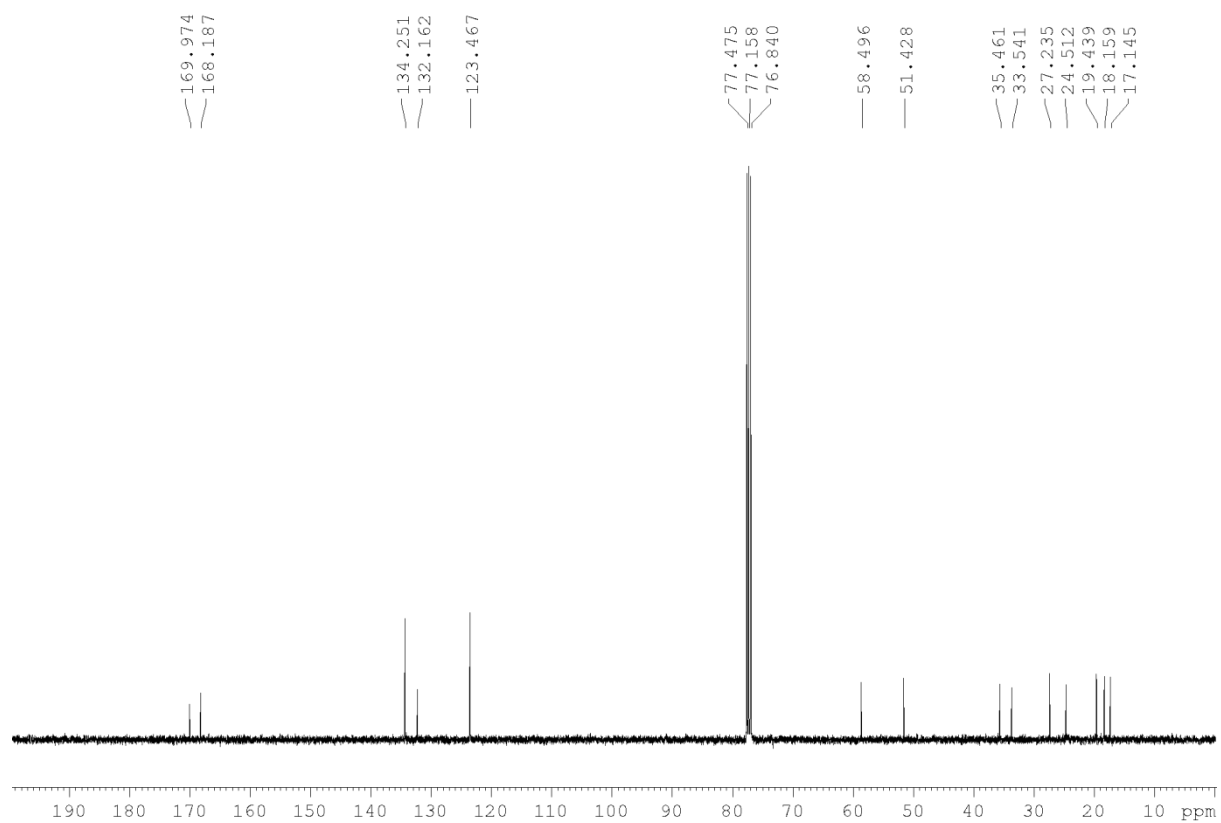

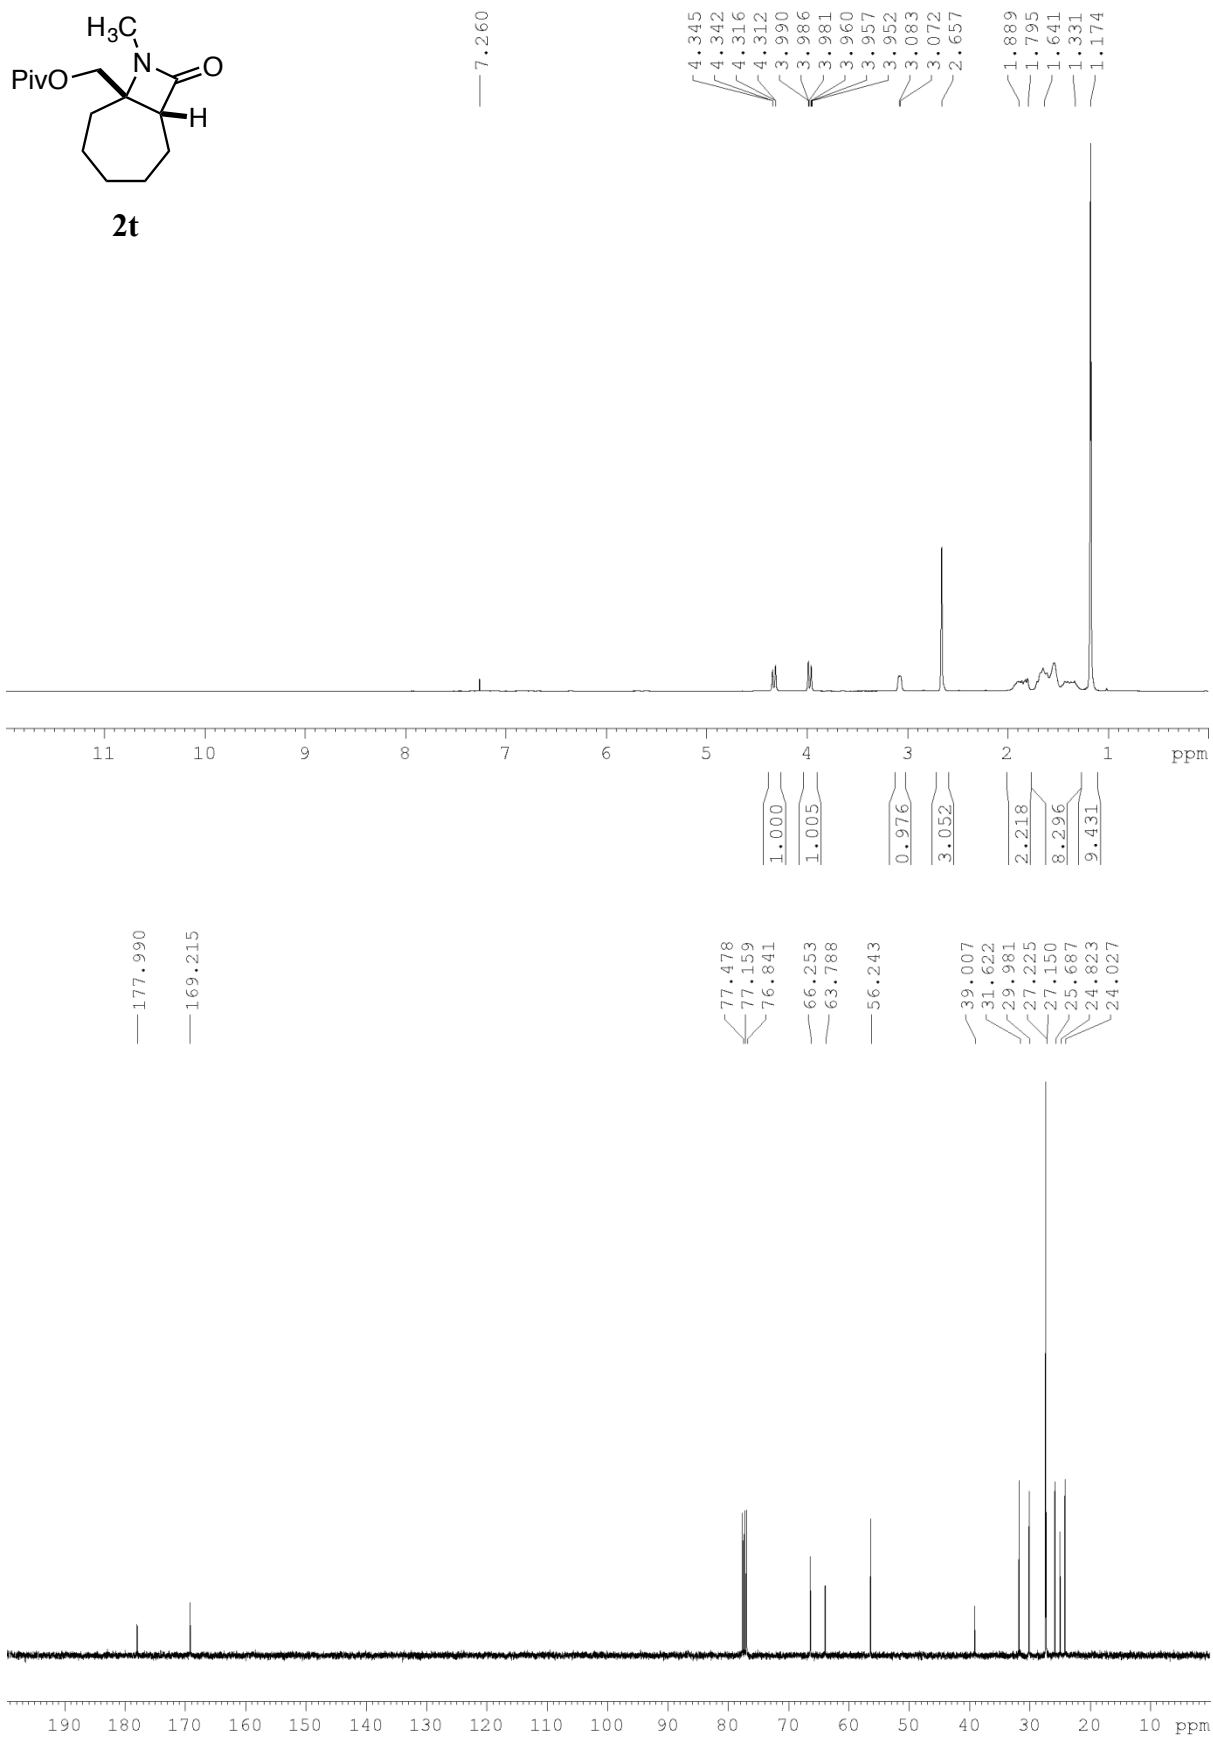

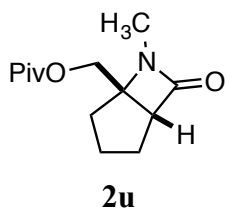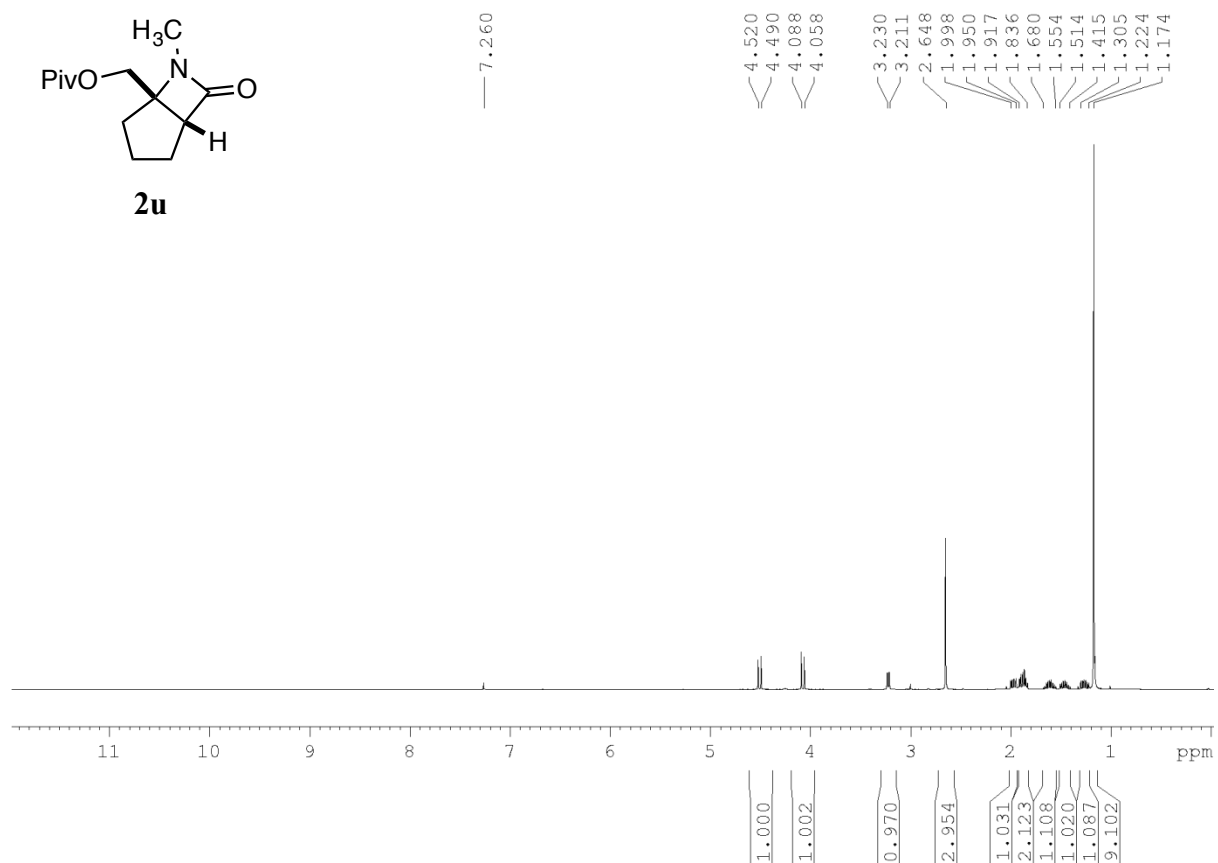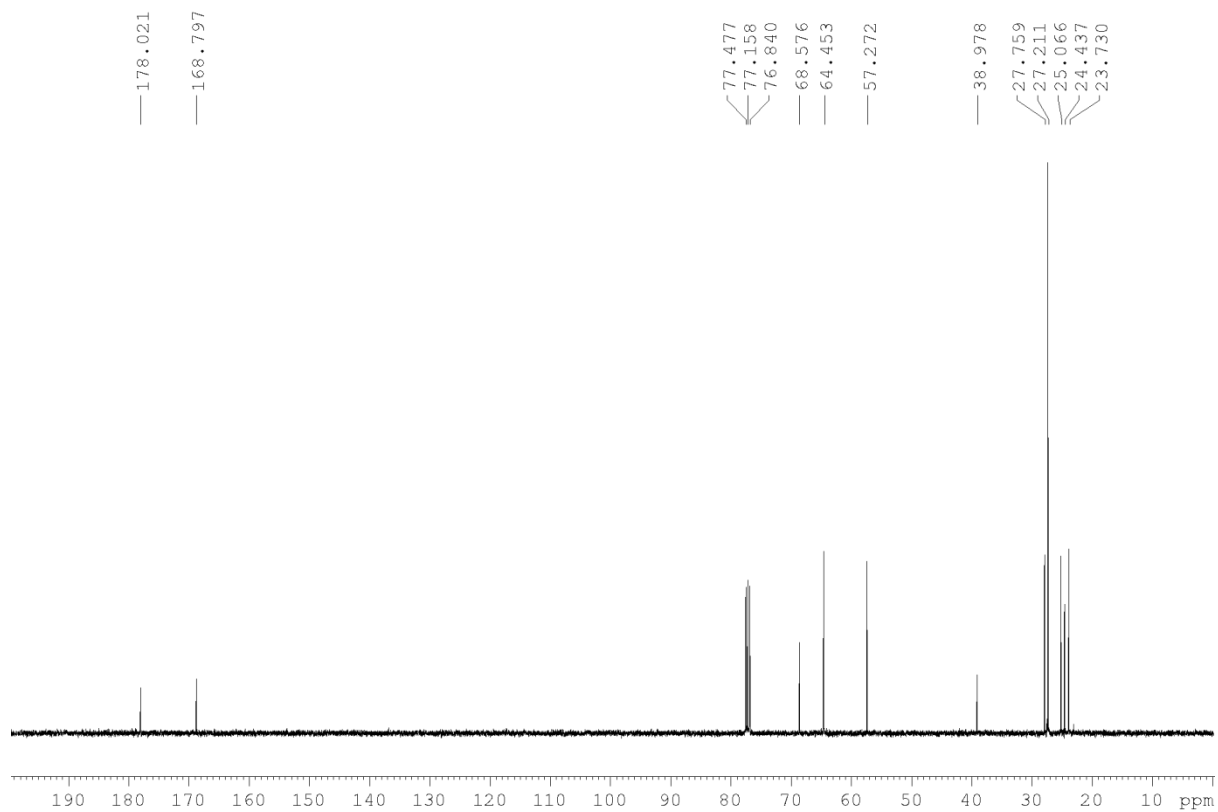

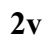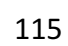

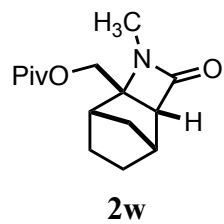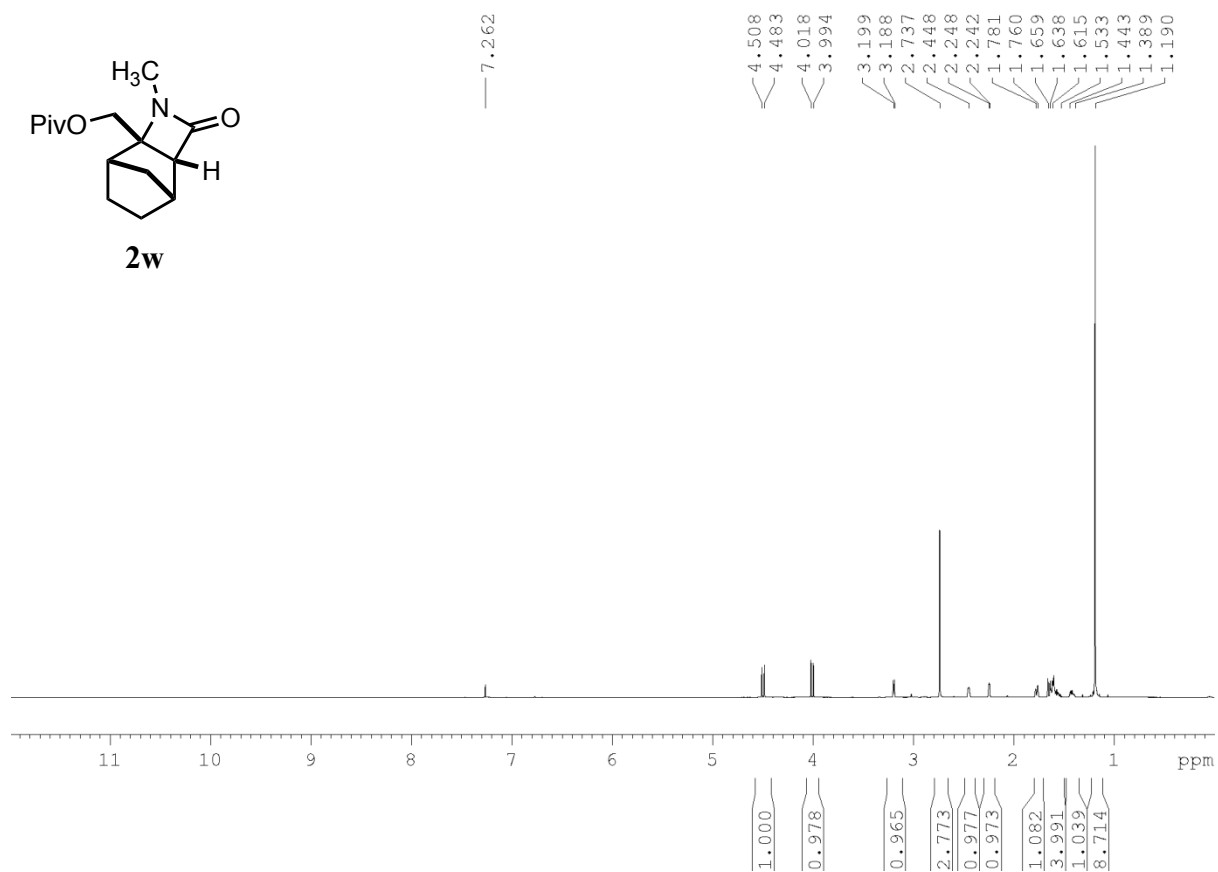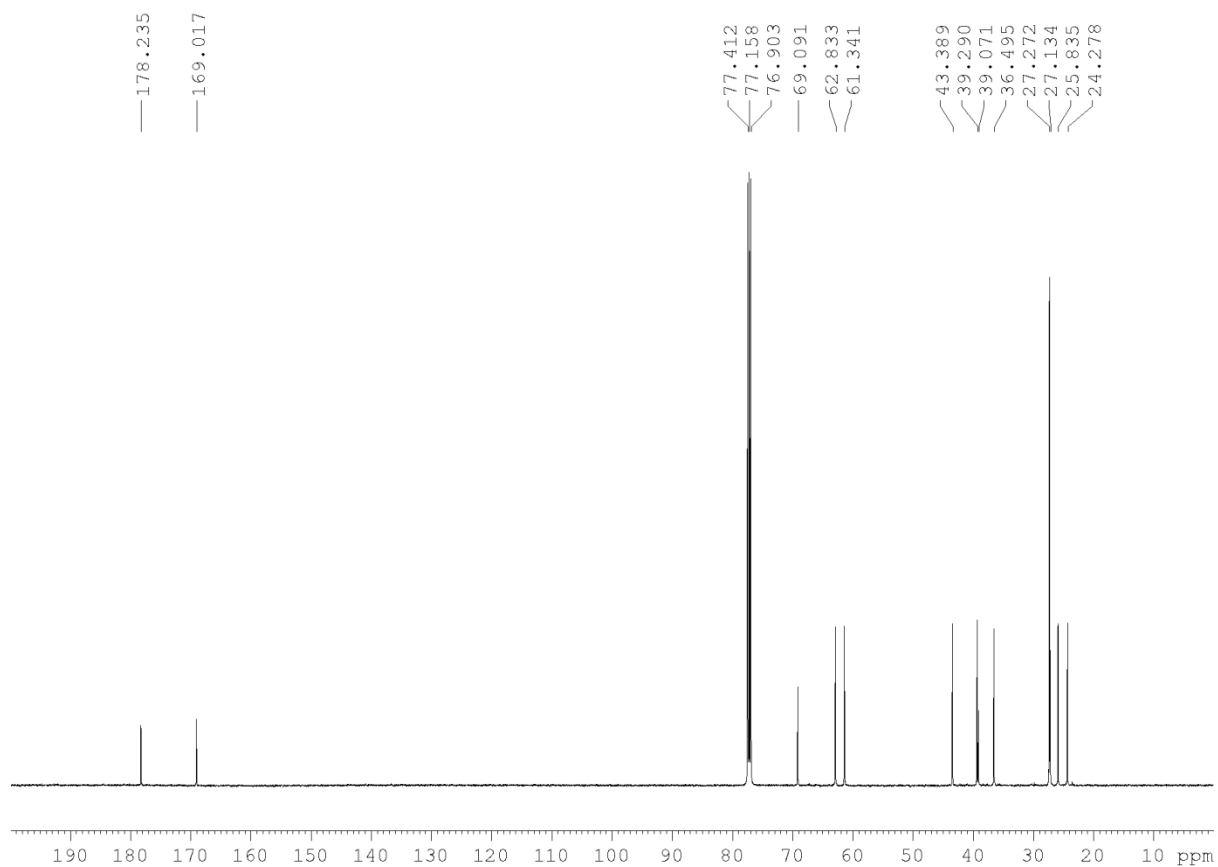

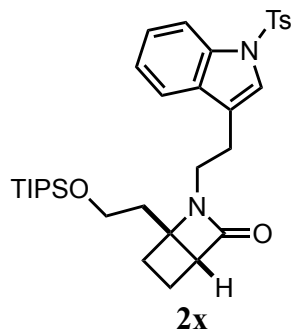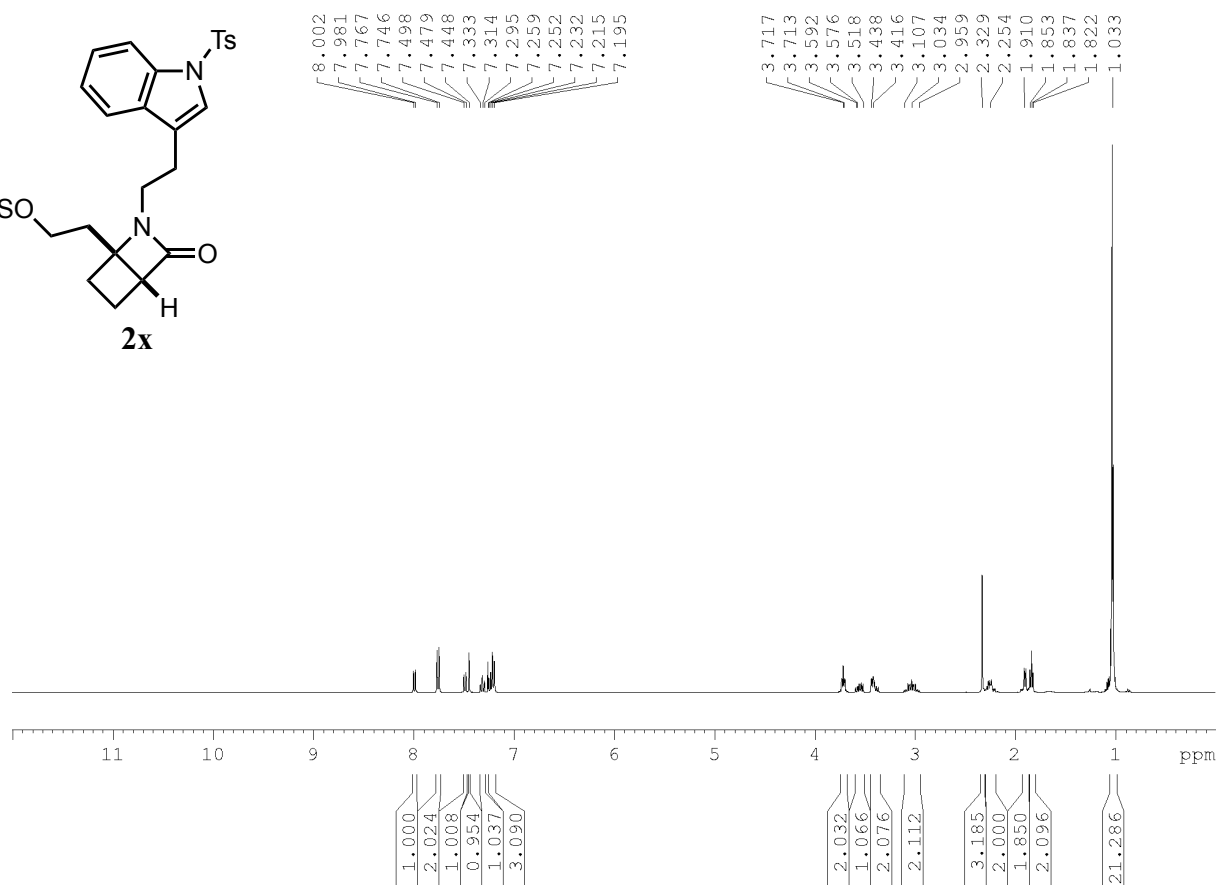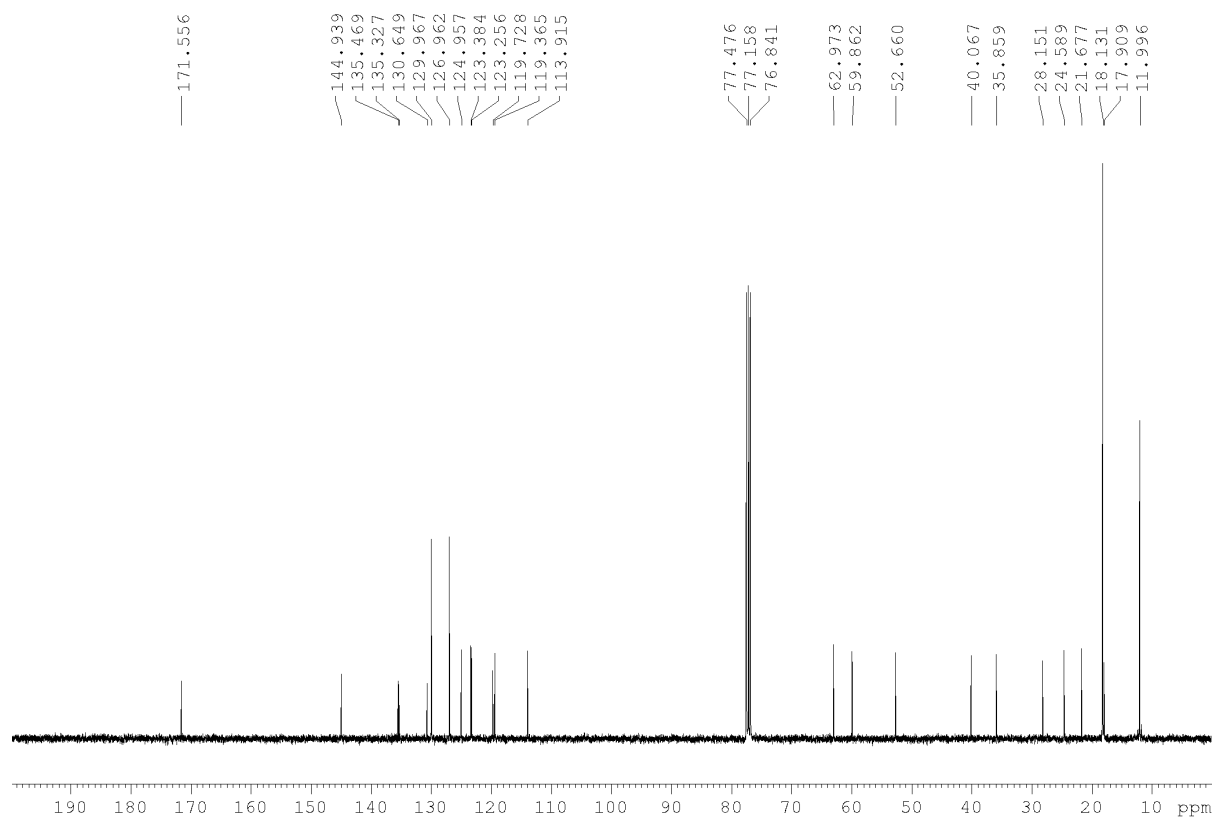

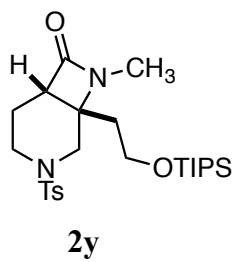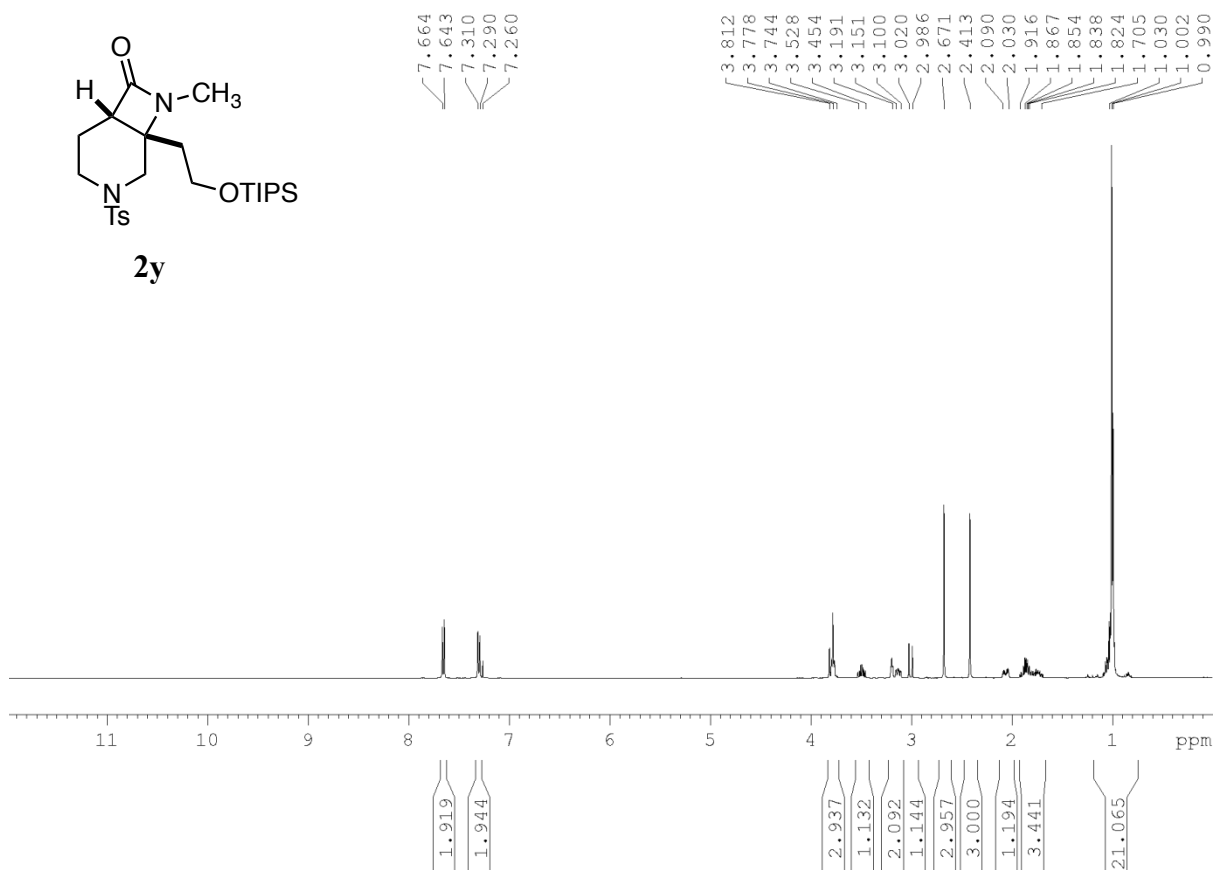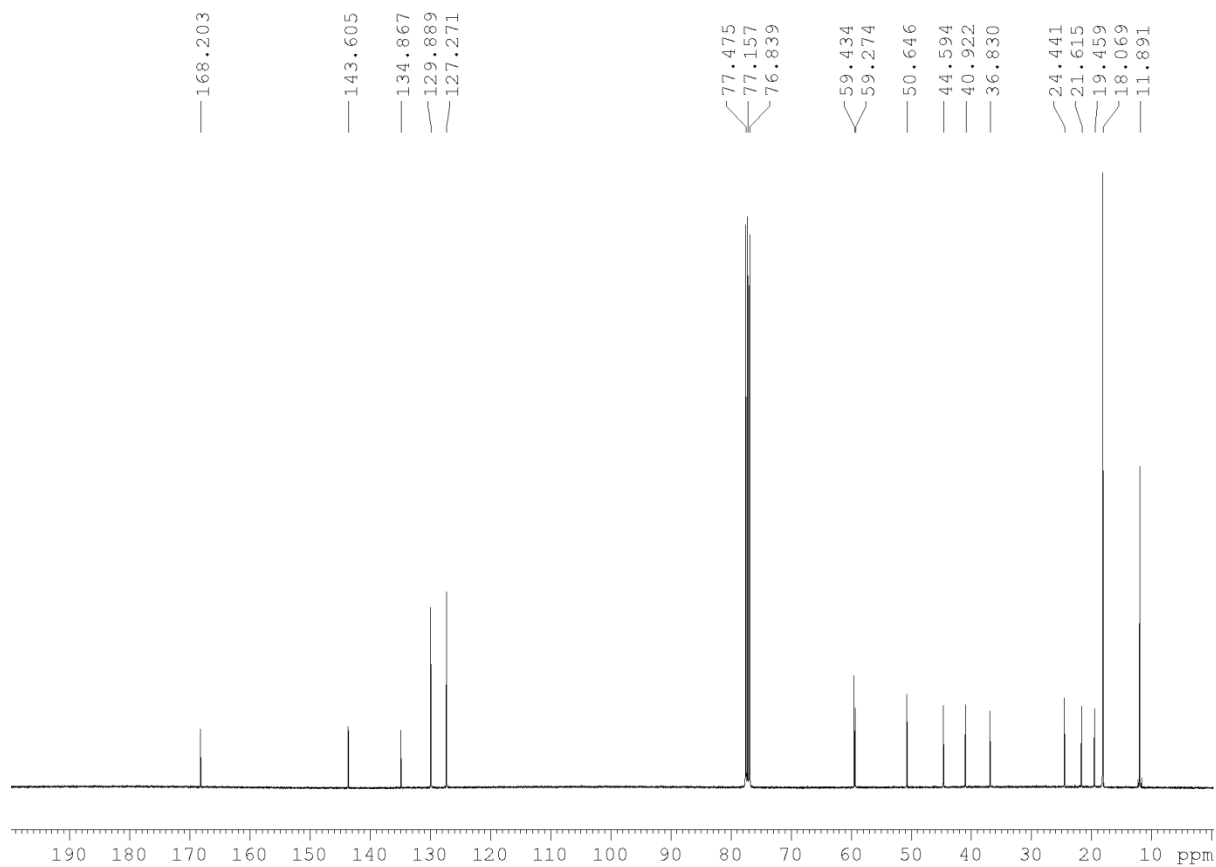

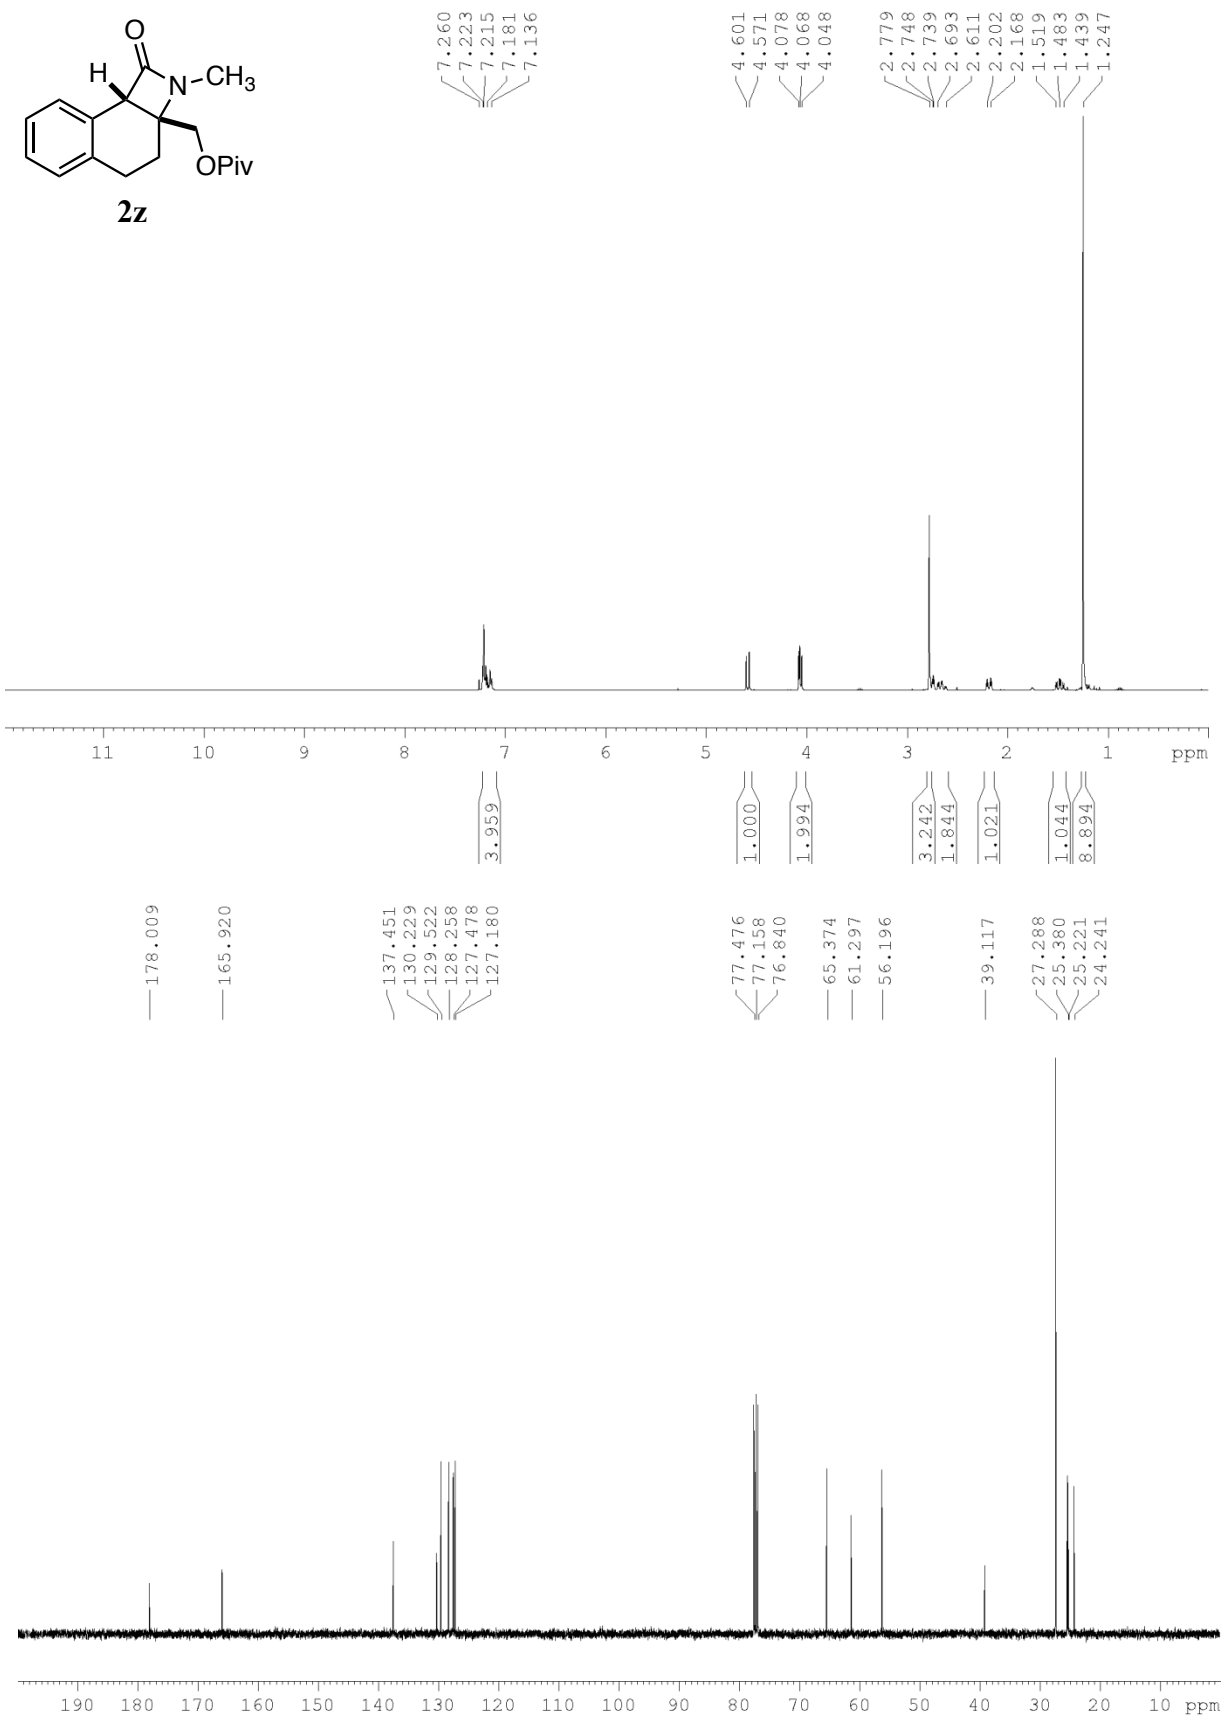

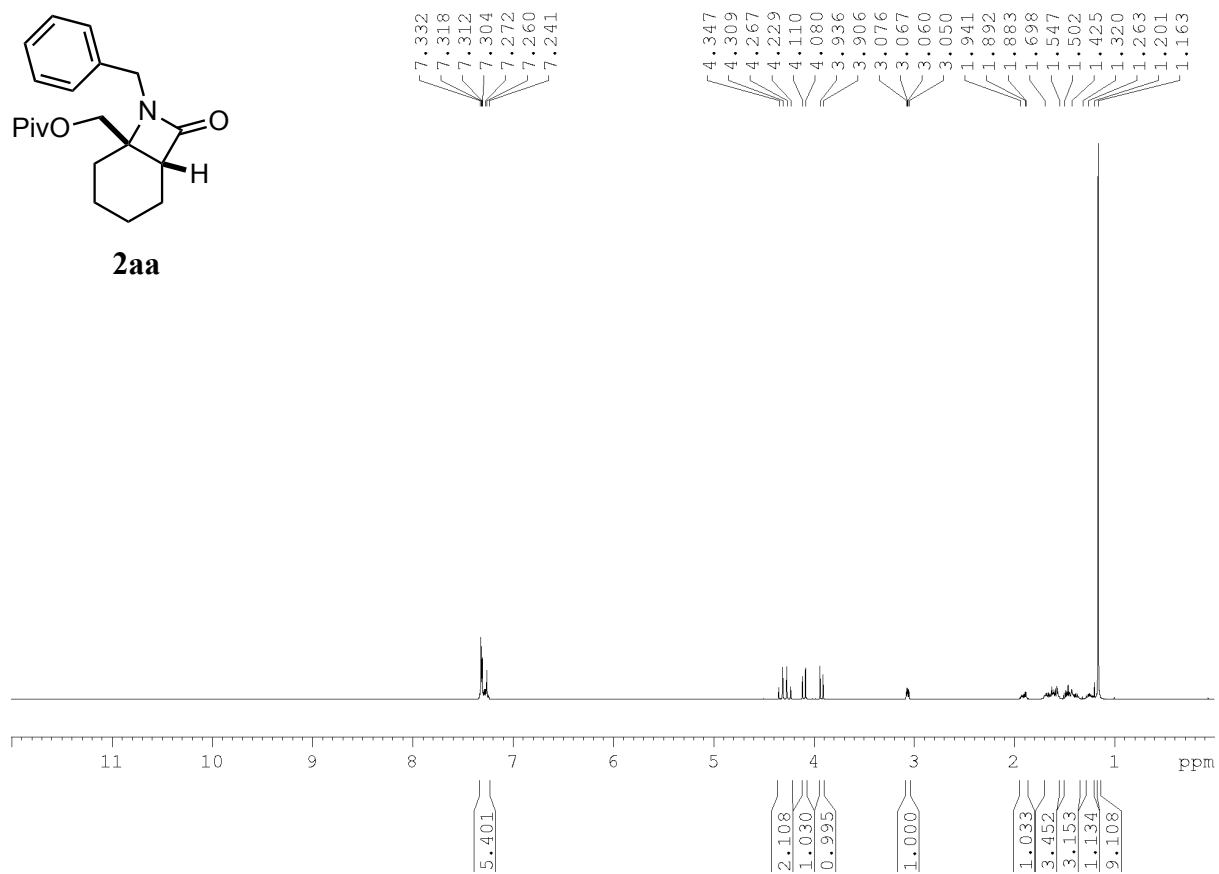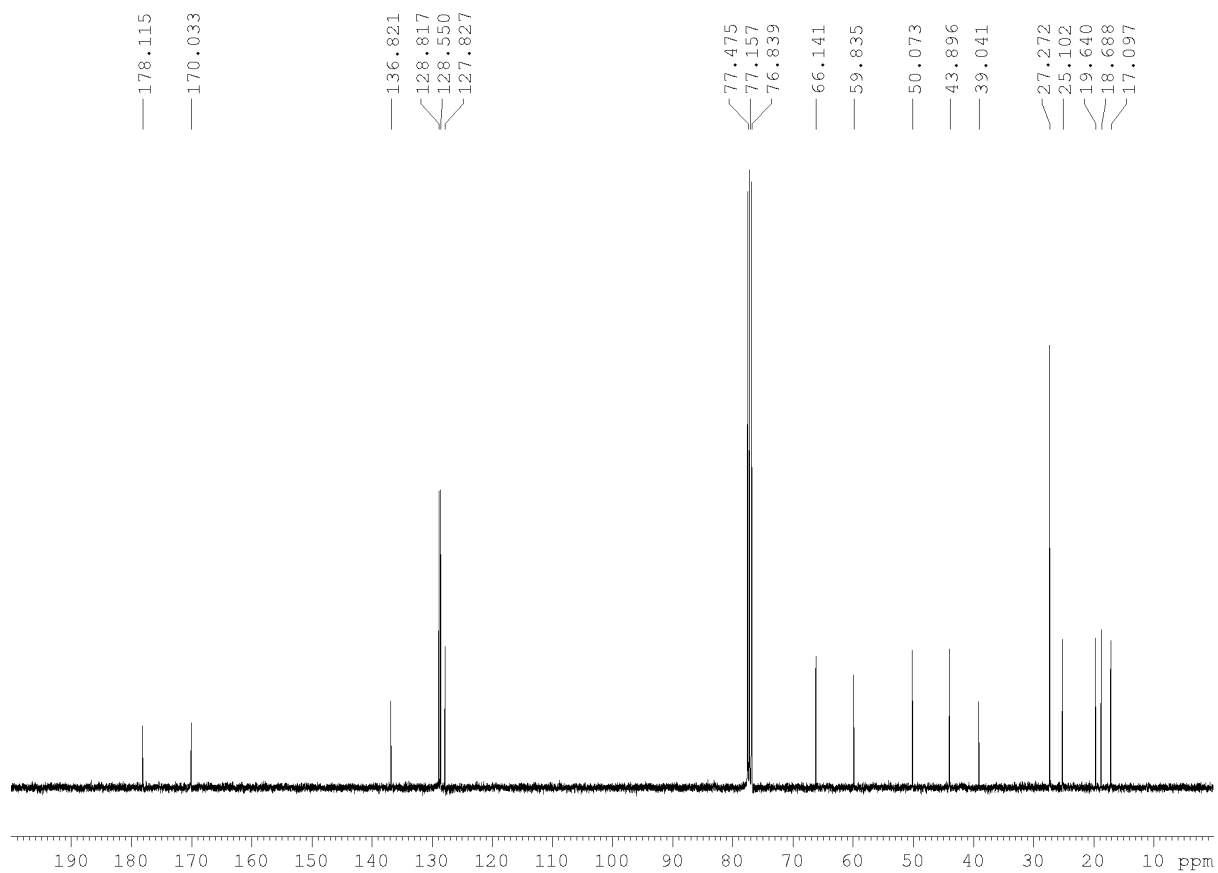

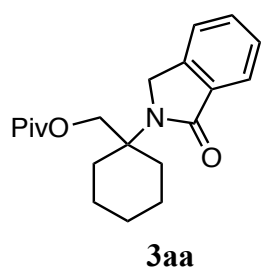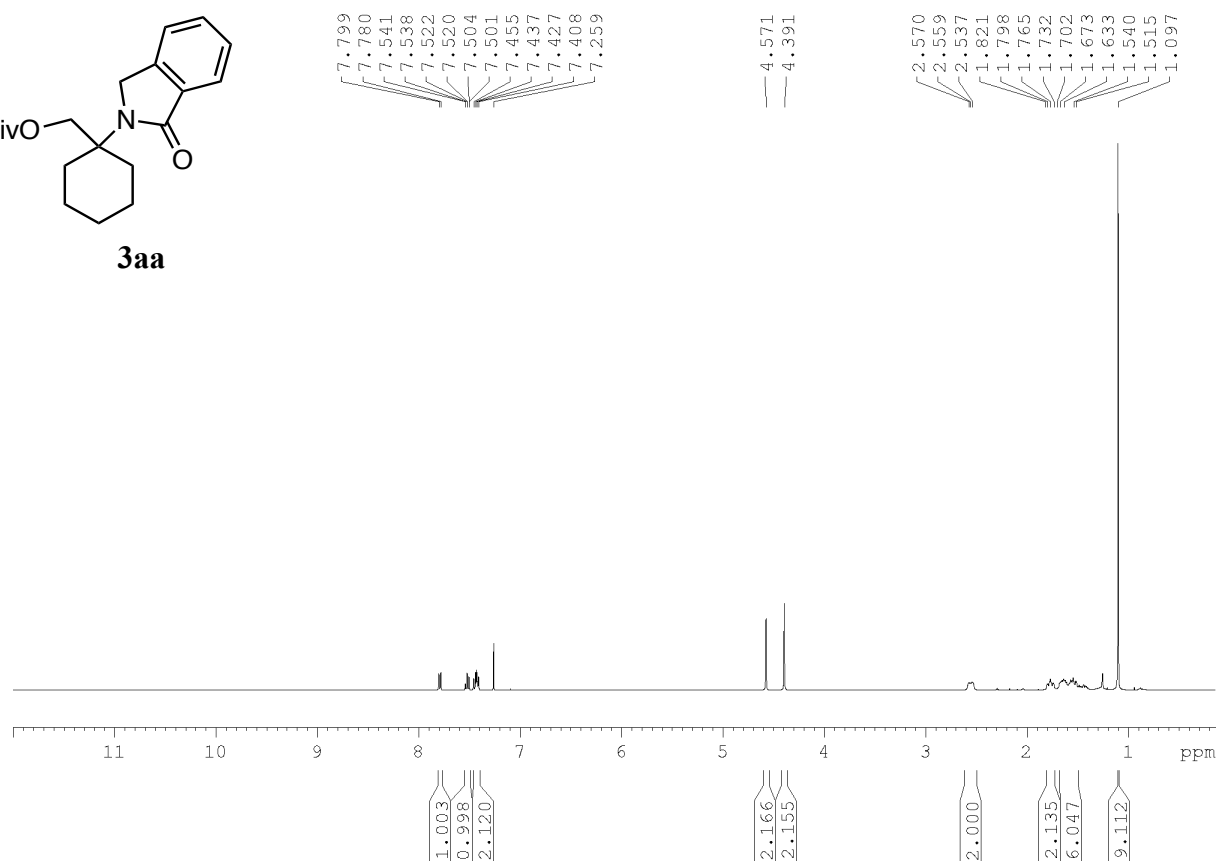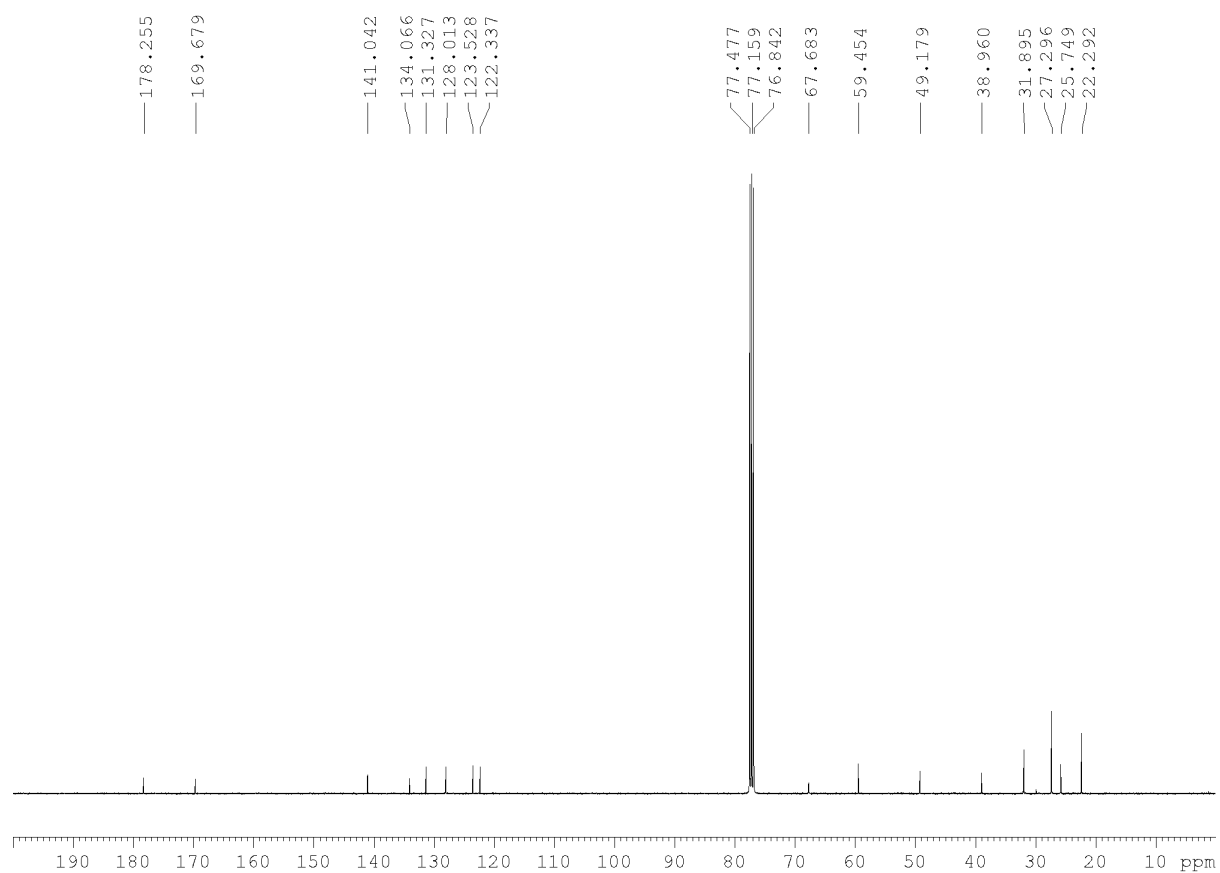

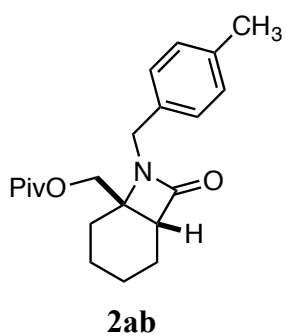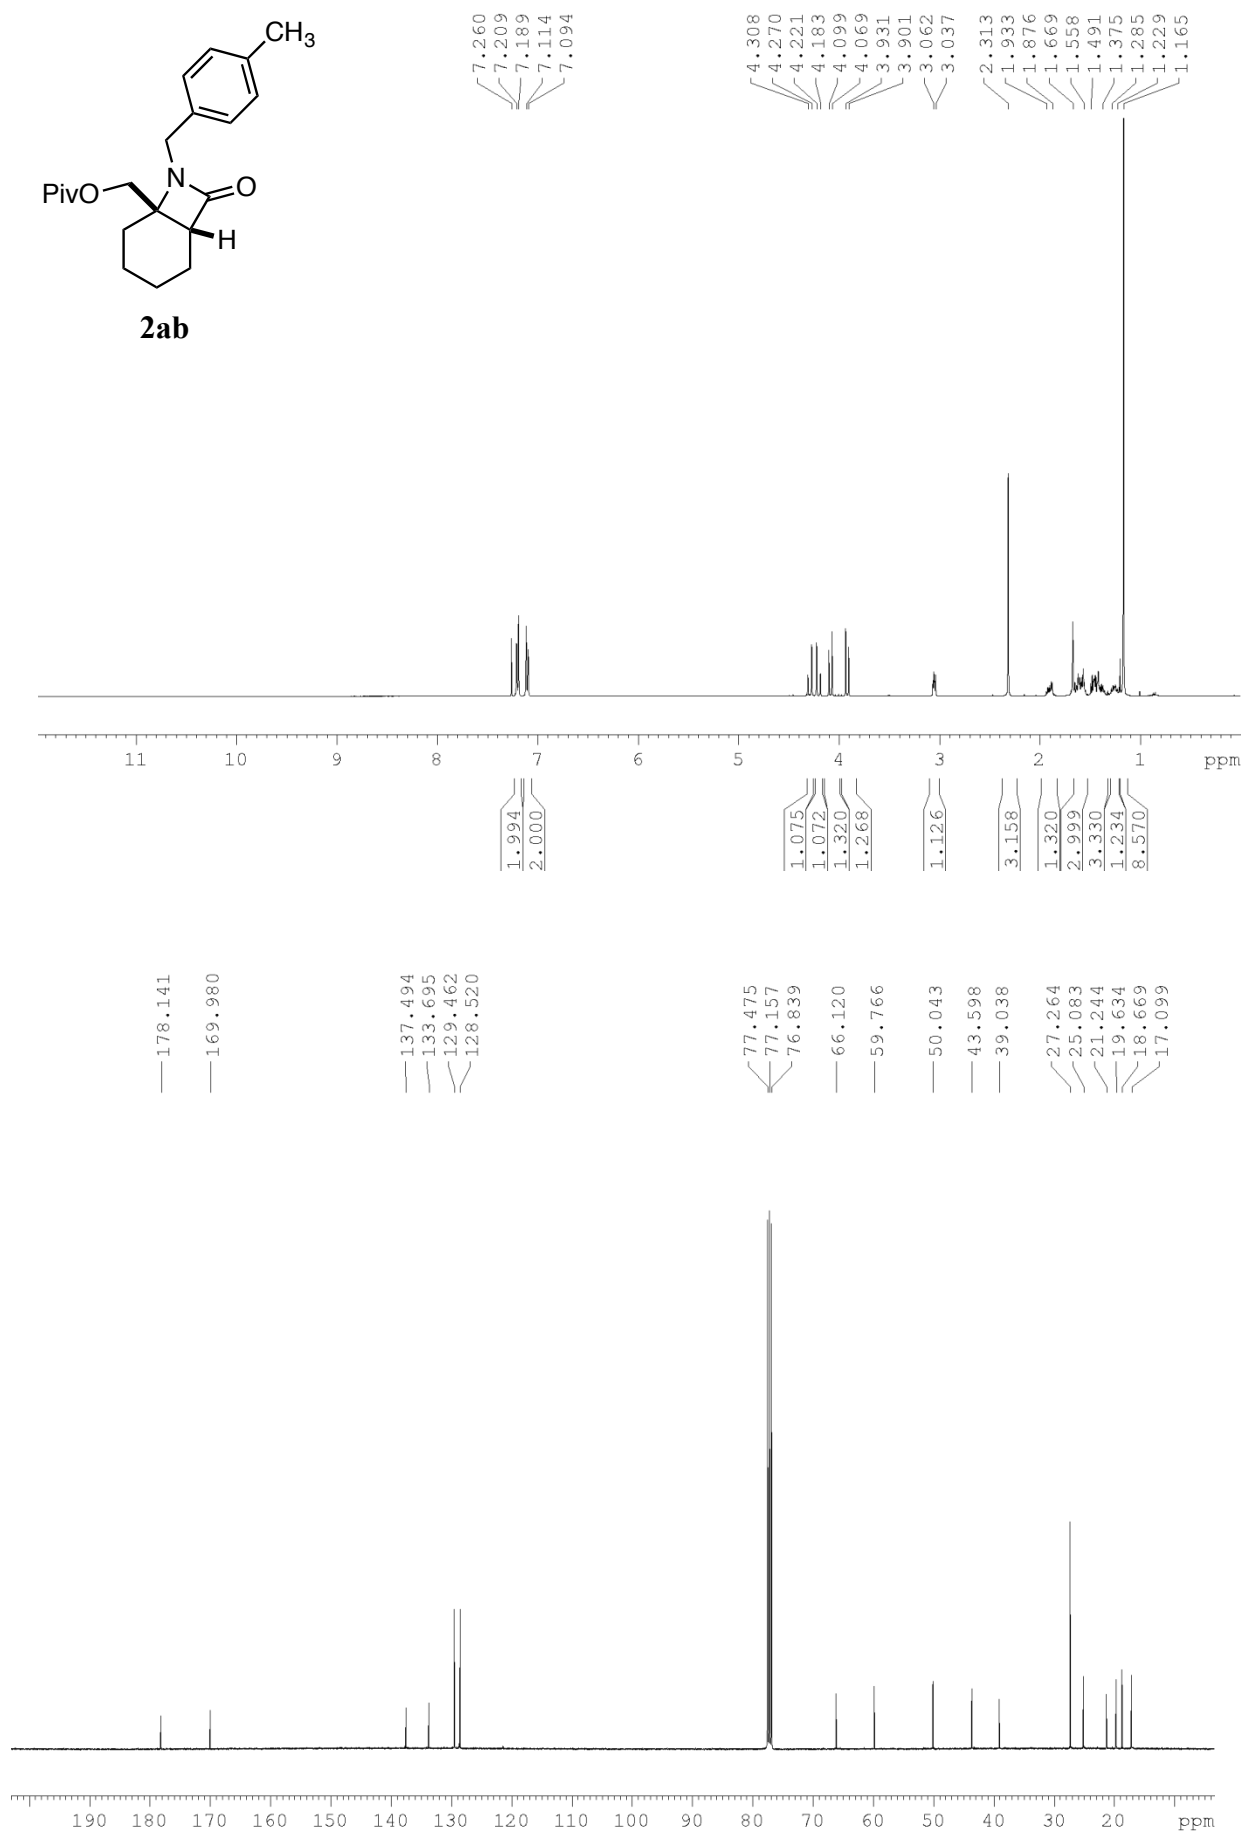

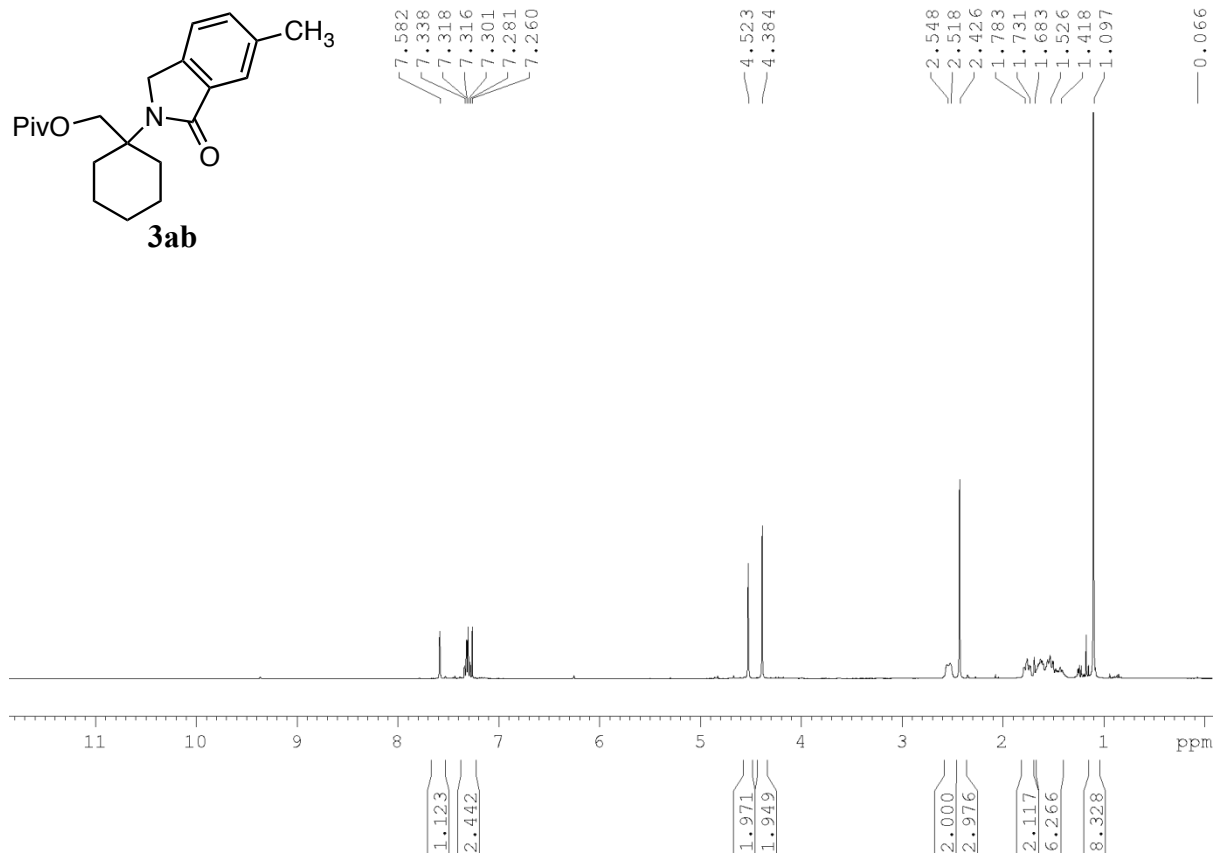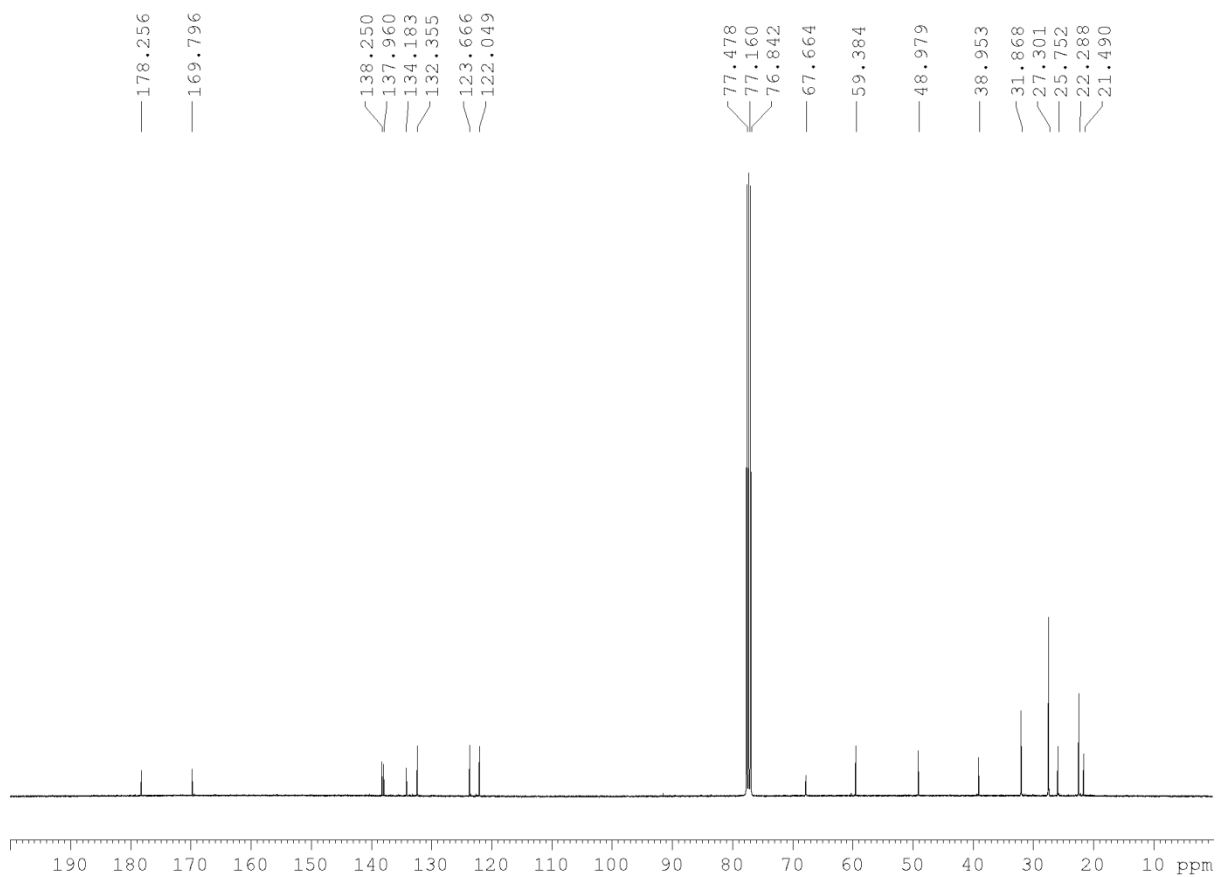

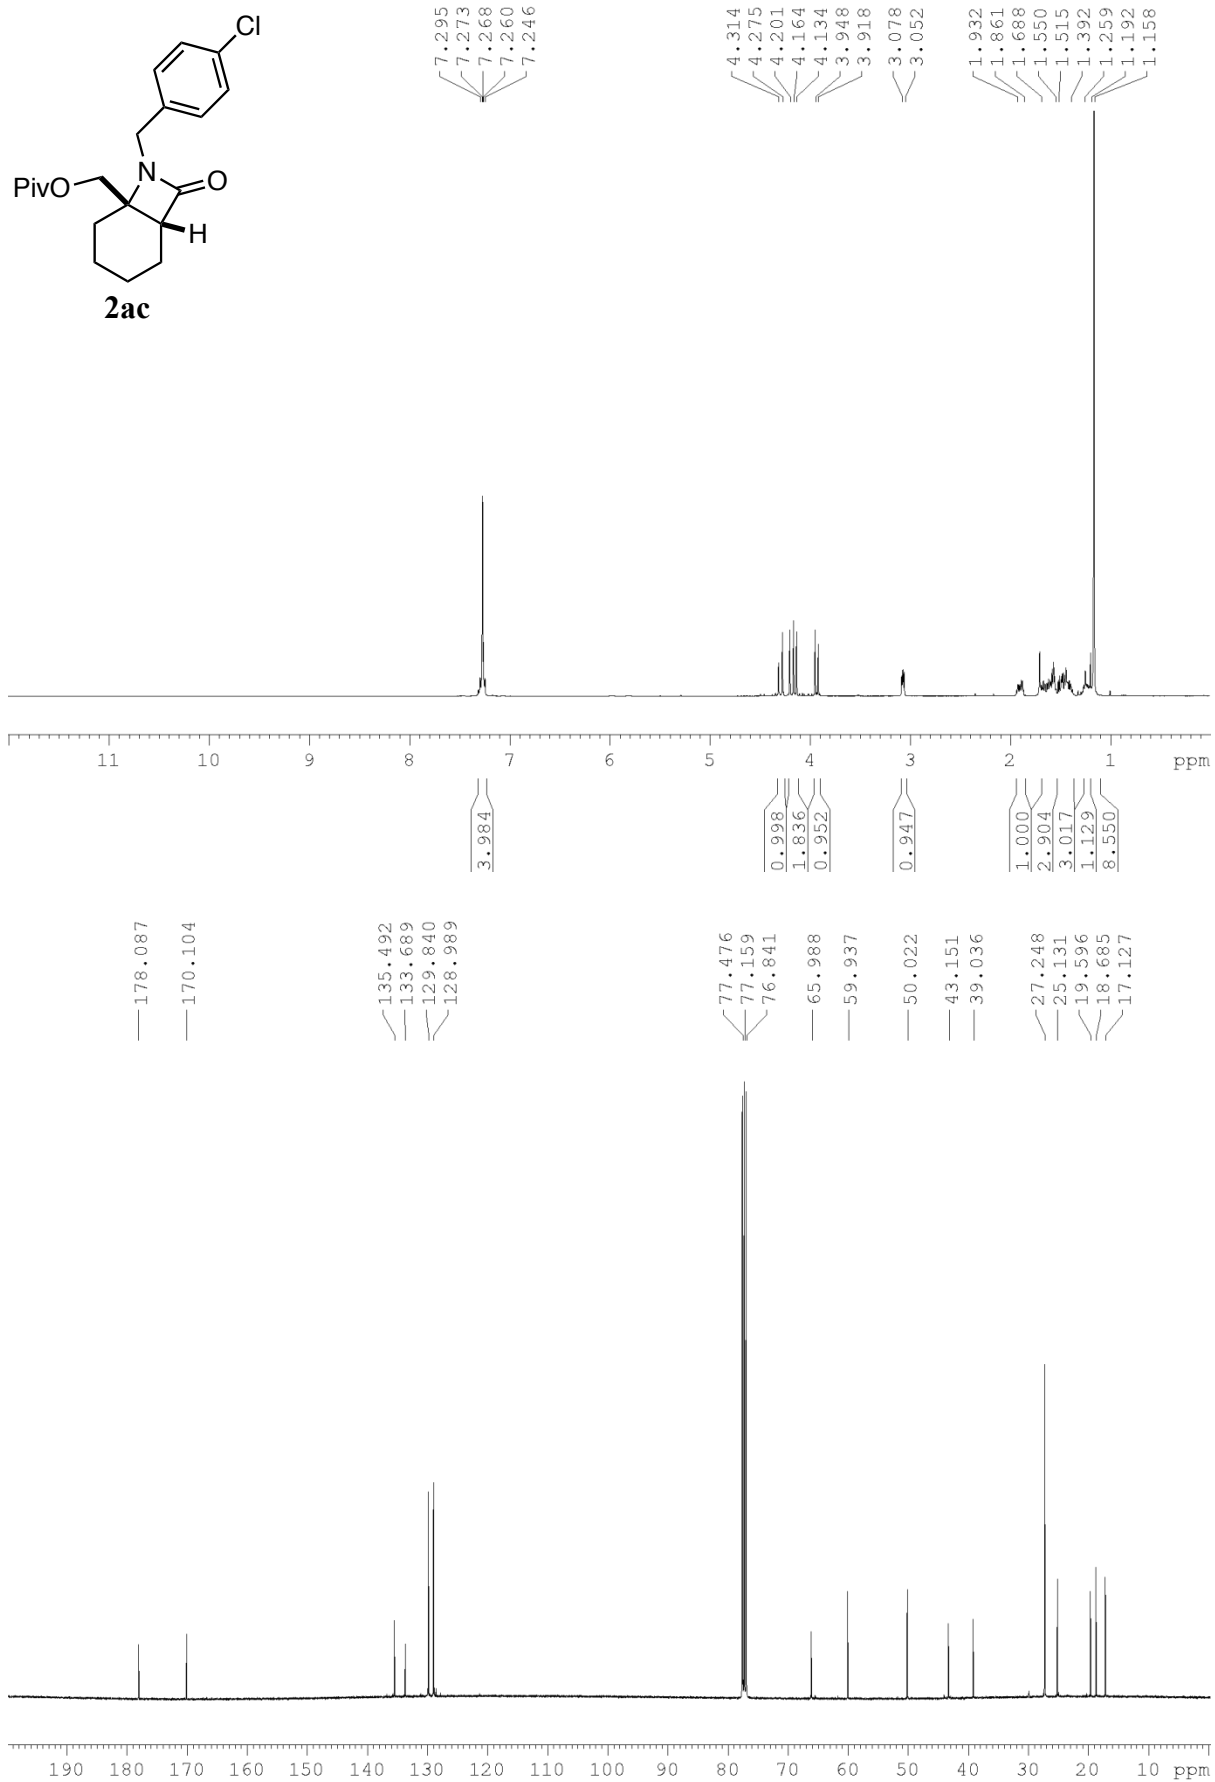

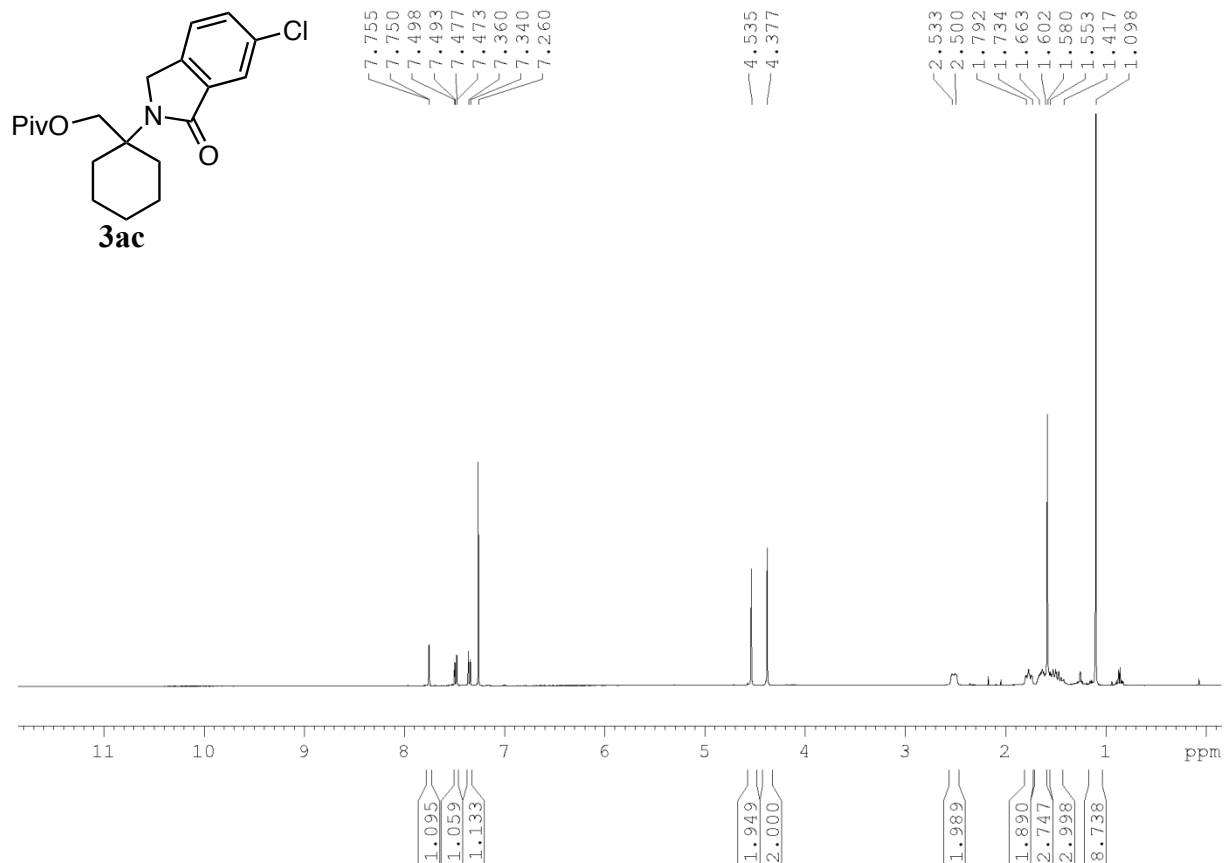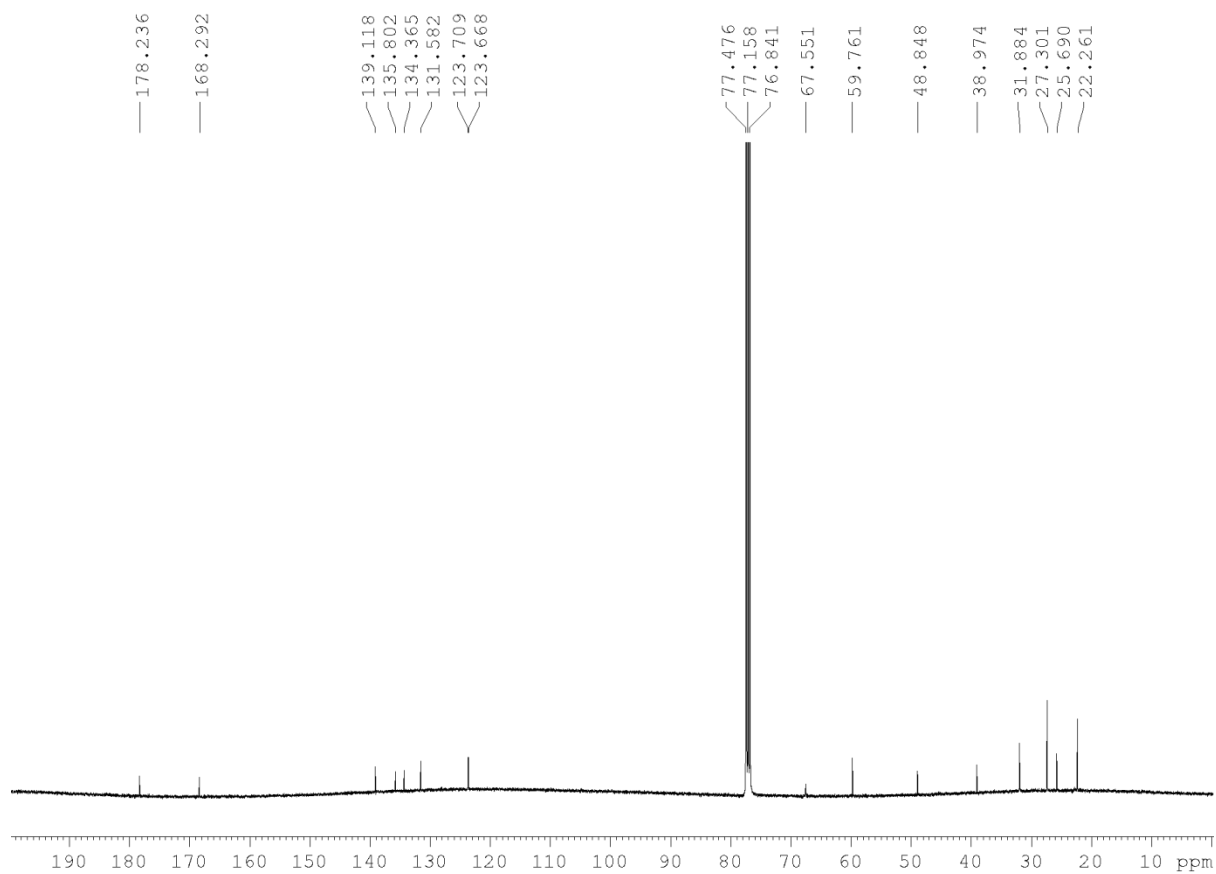

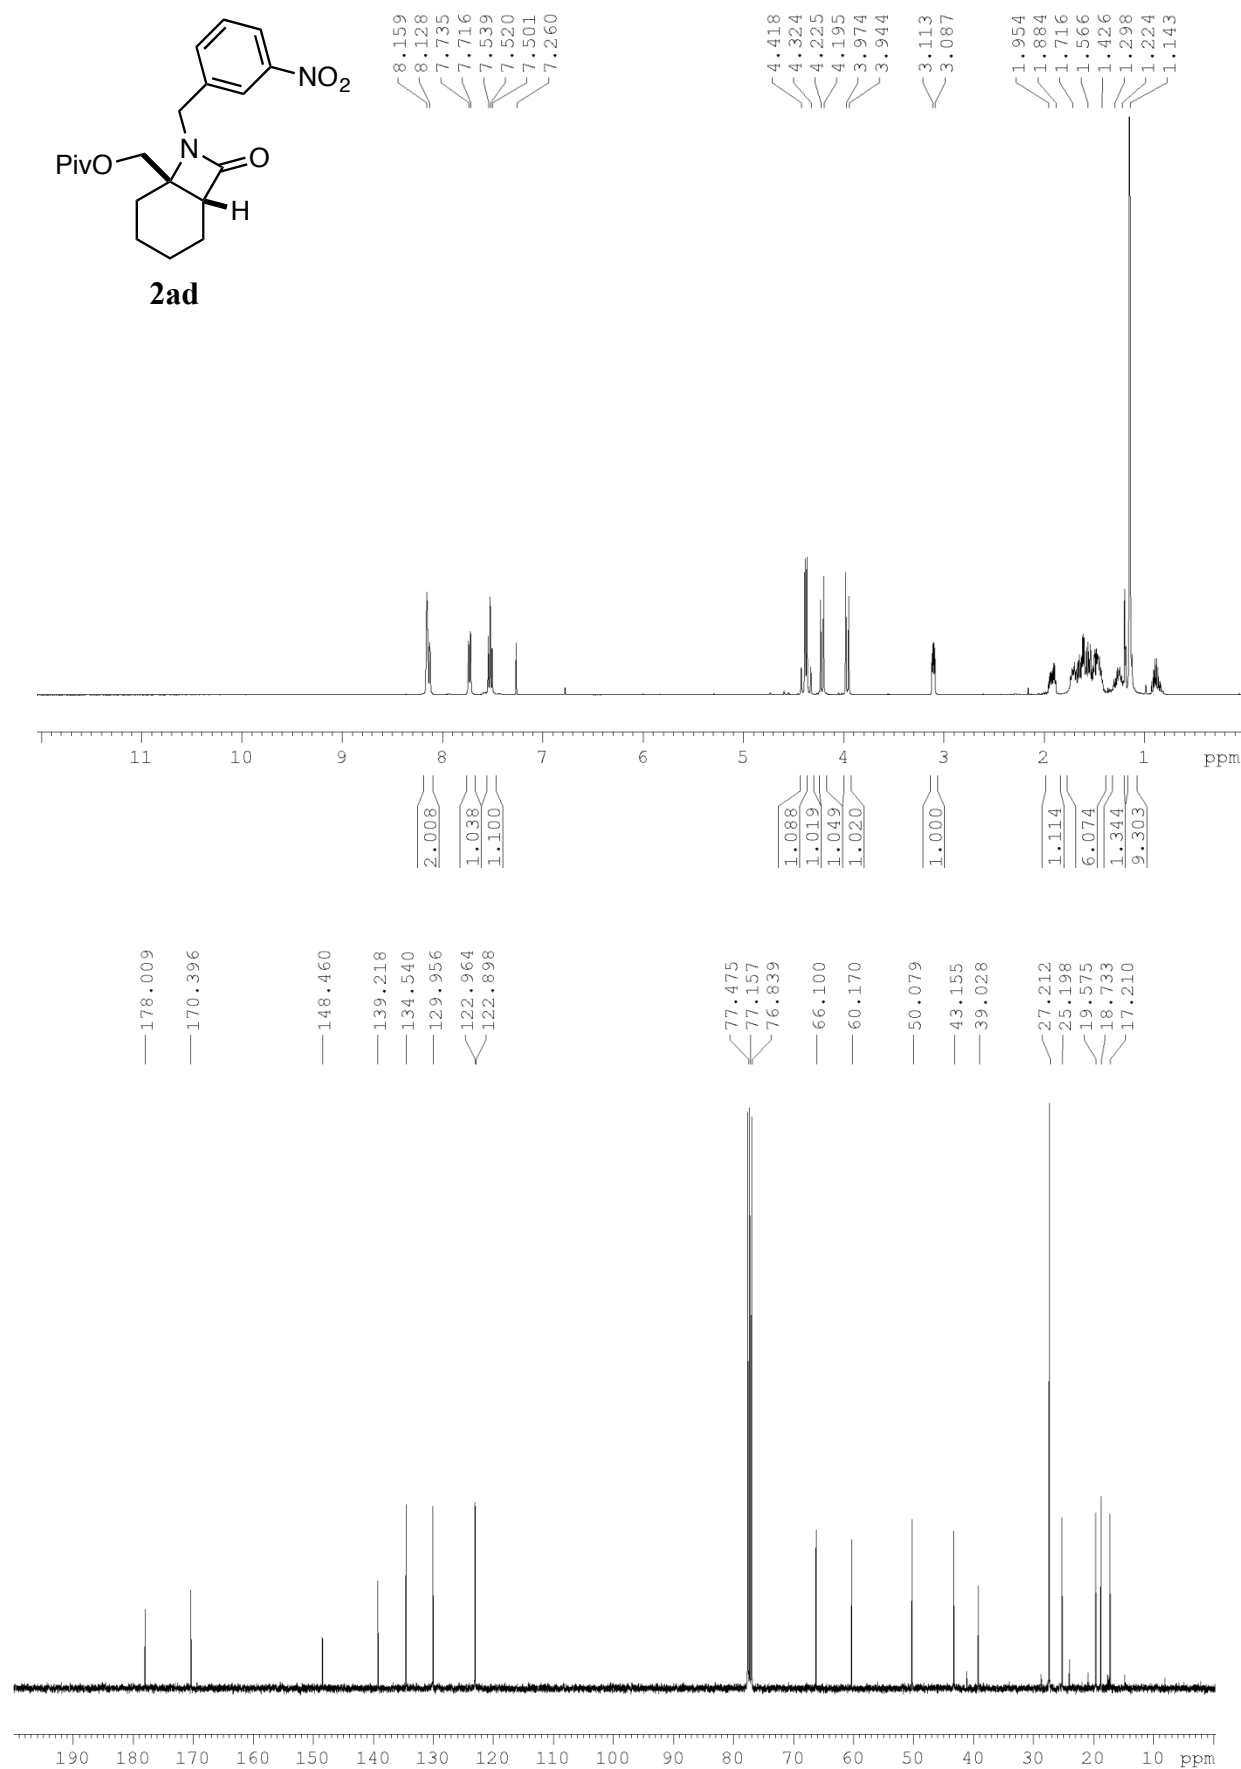

## **NMR of Functionalized Products**

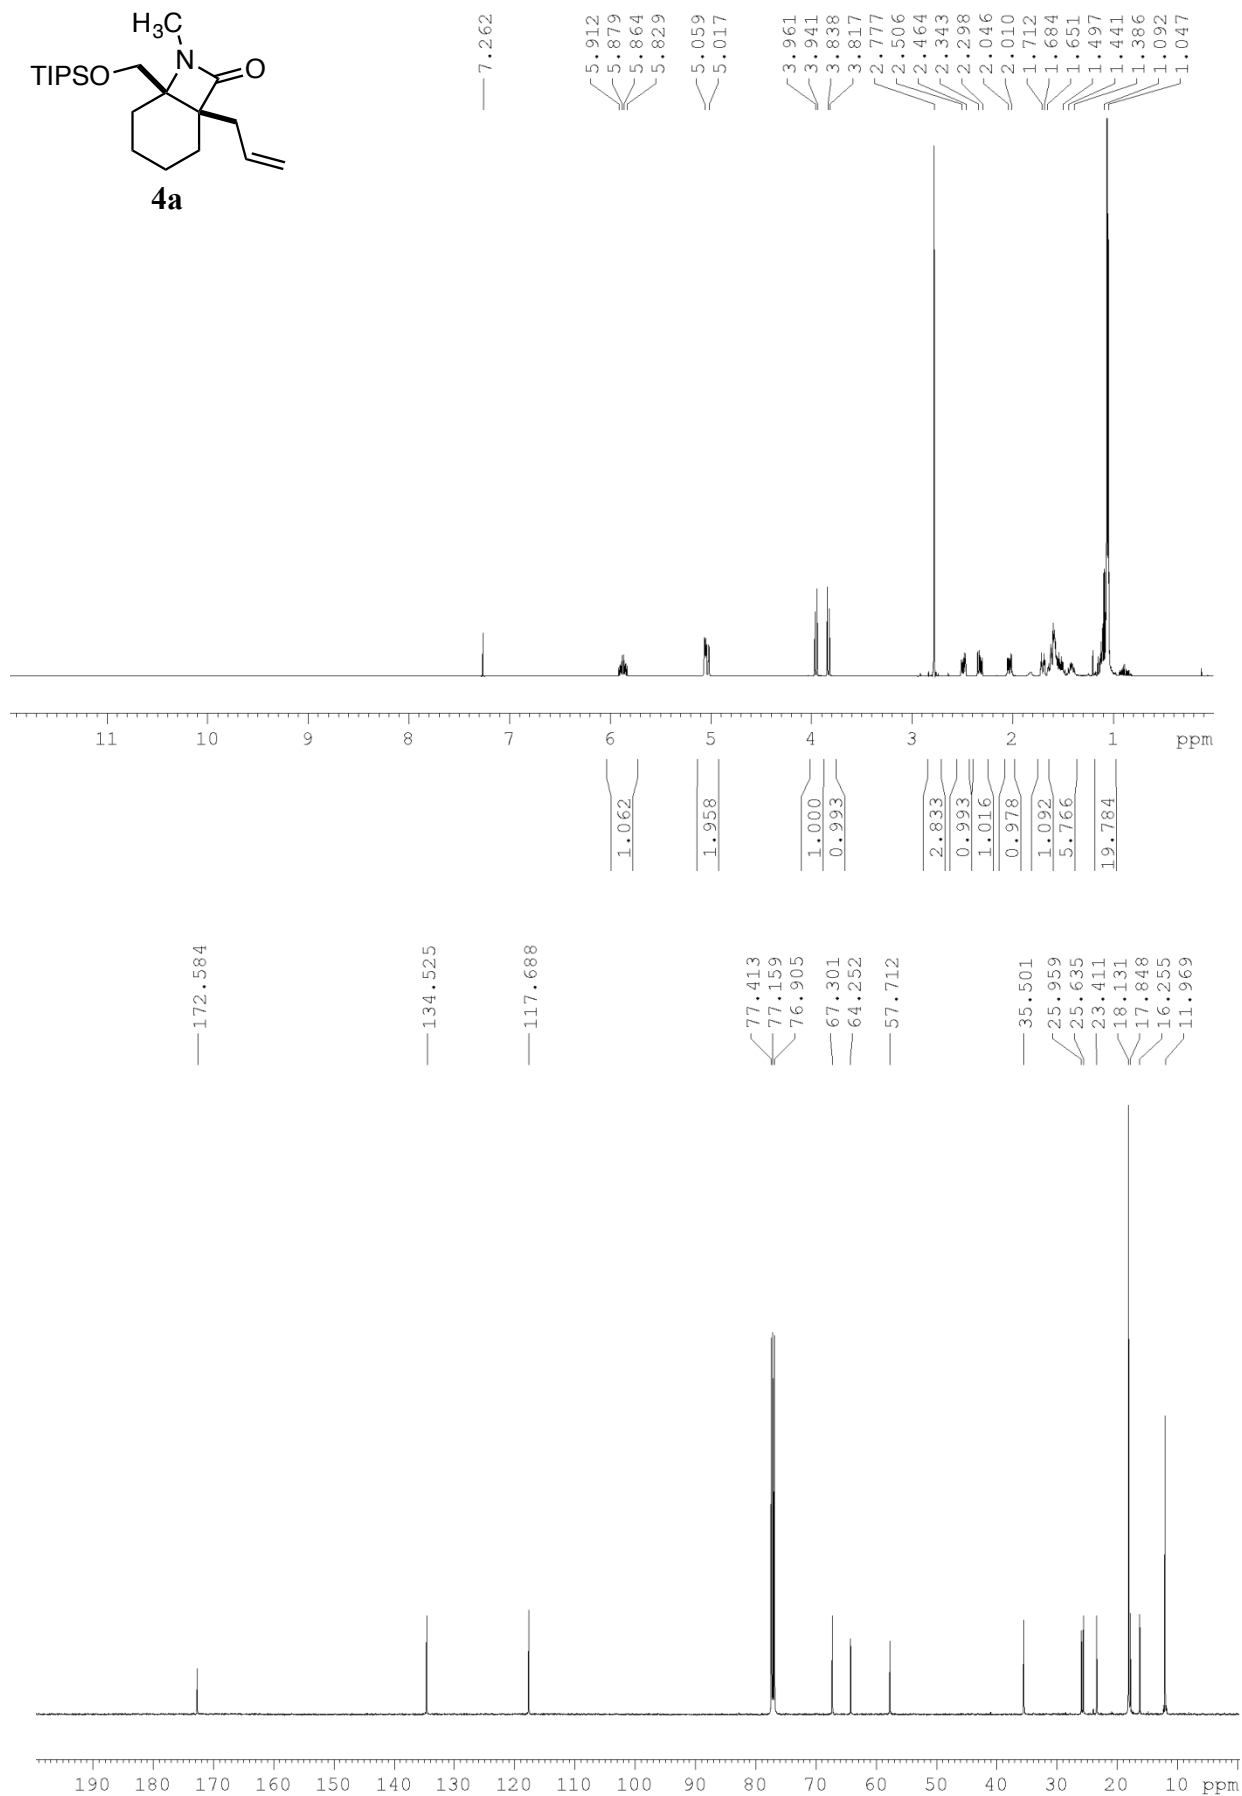

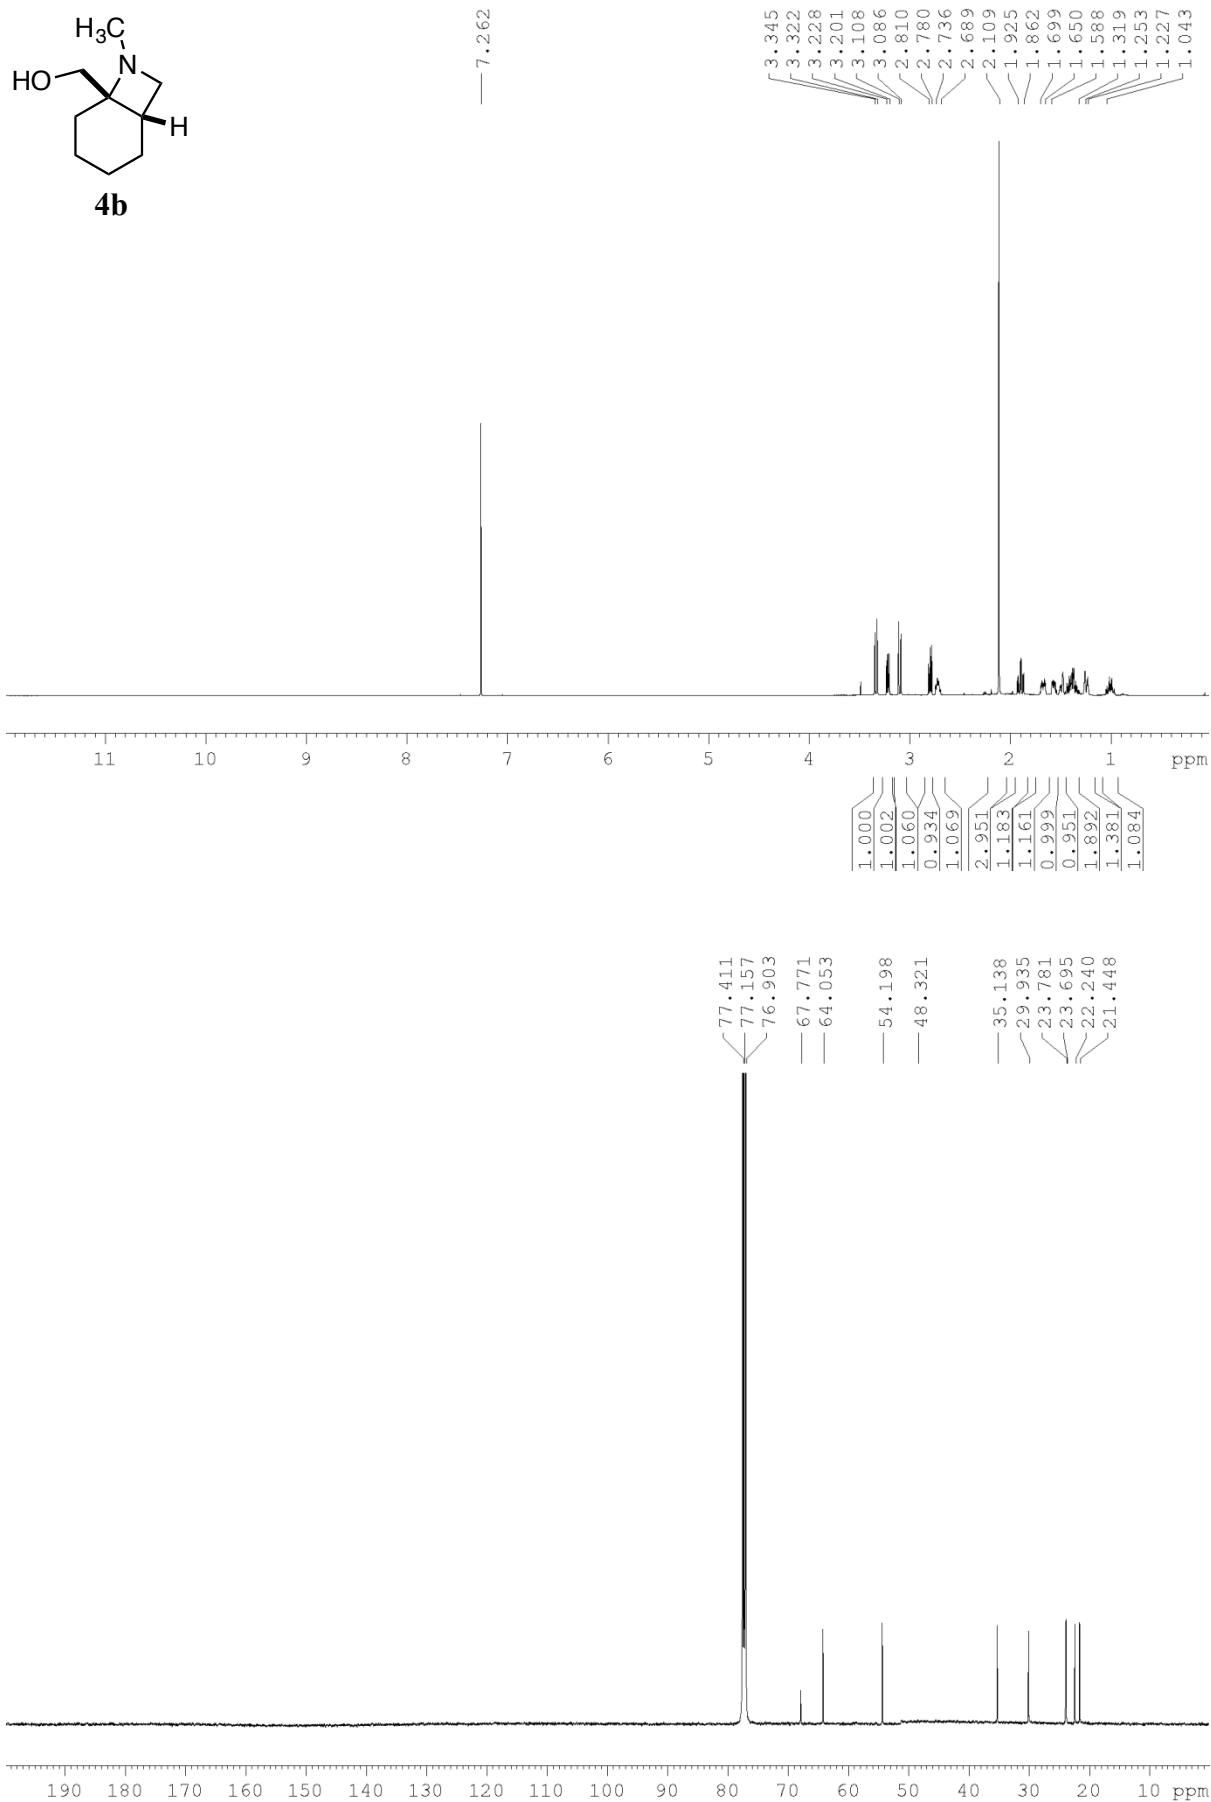

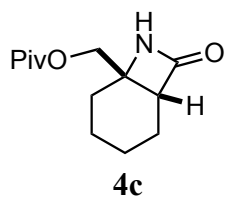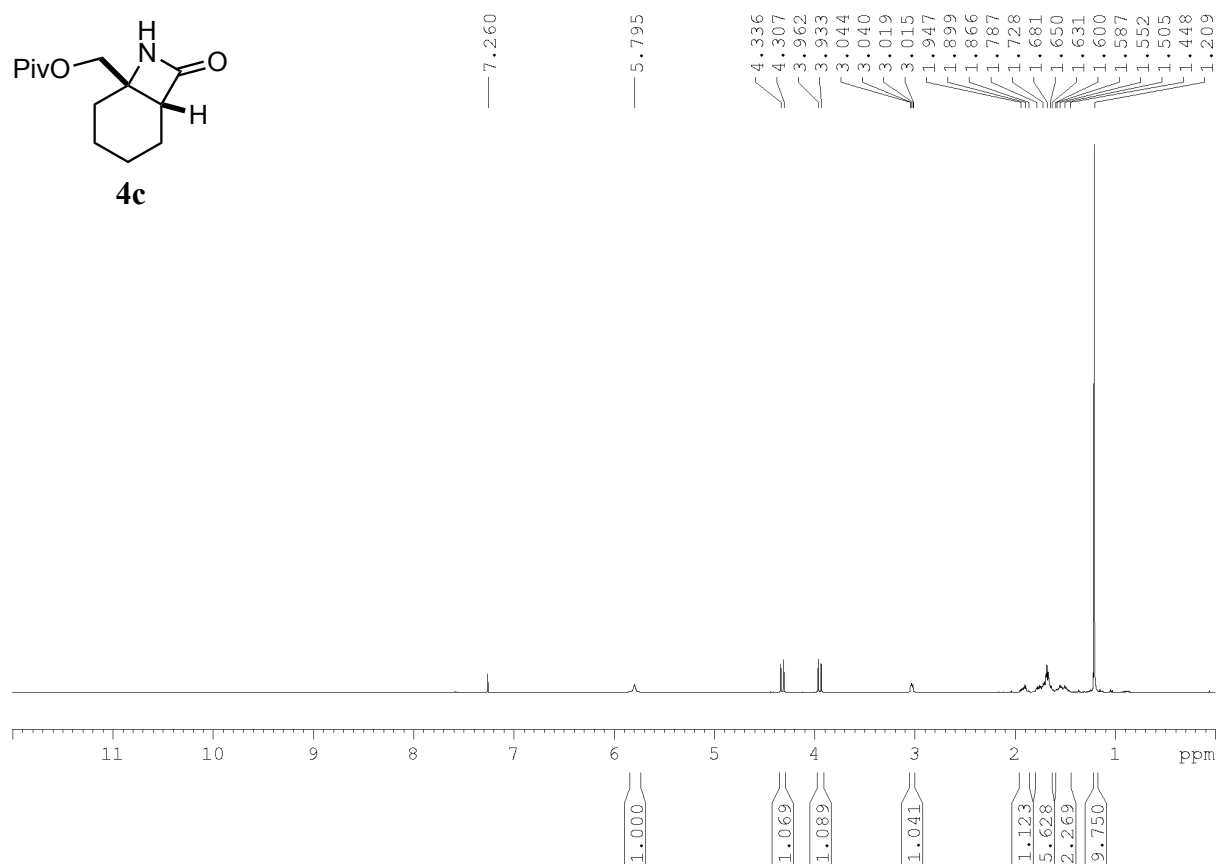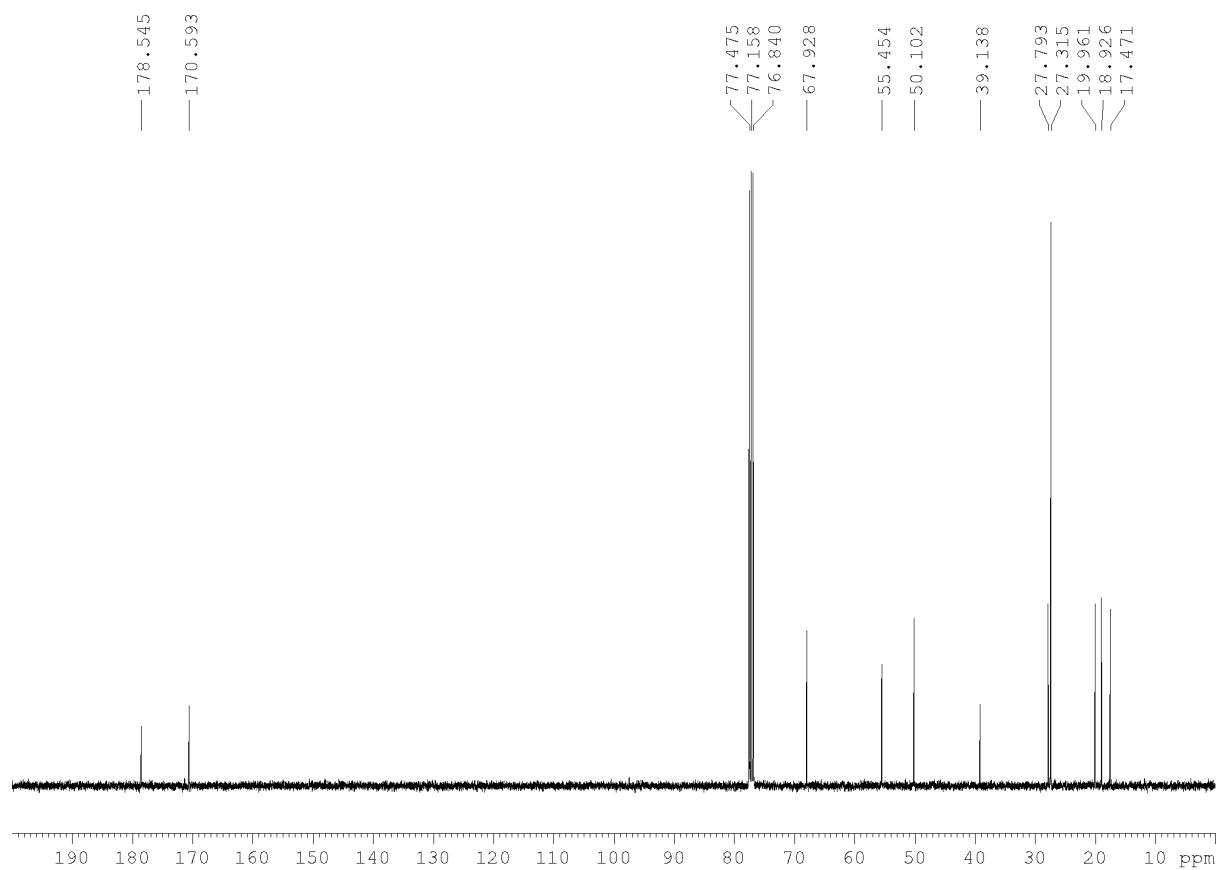

Supplement: c7sc03876c1.pdf [file c7sc03876c1.pdf]
